# Supplementary material for: Comparative Analysis of Acute Kidney Injury Models and Related Fibrogenic Responses: Convergence on Methylation Patterns Regulated by Cold Shock Protein
Source: Cells. 2024 Feb 20;13(5):367. doi: 10.3390/cells13050367 (PMC10930537; doi:10.3390/cells13050367)
Supplement: Supplementary file 1 [file cells-13-00367-s001.zip › Supplementary Table S2.xlsx]

## Sheet: GSE 30122 DEGs
Supplementary Table 2A. DEGs of GSE 30122
ID	adj.P.Val	P.Value	SYMBOL	t	B	logFC	GI	Symbol	SEQUENCE	GB_ACC		logP_value
ILMN_1673639	0.626837	0.0234	ABI3BP	-2.45176	-3.32861	-0.934443	33667043	ABI3BP	AGGTATTGTCCTTTAGGCGGGGAATGGGAATCCTTGCTGCACTGTTGCAG	NM_015429.2		1.63078
ILMN_1775045	0.950052	0.47	ADIPOQ	-0.735526	-5.56622	-0.424867	44890057	ADIPOQ	TTTGACAGACTCTCGTTCTGTGGCCCTGGCTGGAGTTCAGTGGTGTGATC	NM_004797.2		0.327902
ILMN_1736178	0.23875	0.00125	AEBP1	-3.74691	-0.84438	-1.08233	53692188	AEBP1	TCAGCACATGGAAGGCCCCTGGTATGGACACTGAAAGGAAGGGCTGGTCC	NM_001129.3		2.90309
ILMN_2234605	0.873978	0.114	AGRN	1.65405	-4.59832	1.14192	54873612	AGRN	AAGGACTTCCTGGCATTGGCGCTGCTAGATGGCCGCGTGCAGCTCAGGTT	NM_198576.2		0.943095
ILMN_1770454	0.950052	0.602	AGRN	0.530106	-5.68822	0.193553	54873612	AGRN	CCTCCCCACAGCGTCAGTGAAAGTCGTCCTTGTCTCAGAATGACCAGGGG	NM_198576.2		0.220404
ILMN_1794384	0.95493	0.687	AMBN	0.408474	-5.74233	0.0724289	48255960	AMBN	CAGAGCAAGGTTCTAAGGGTCTCAGCATTTGATCATCACTTTTTCTTAGC	NM_016519.4		0.163043
ILMN_1751092	0.992956	0.961	AMBN	0.0489478	-5.82085	0.0156084	48255960	AMBN	CCCAAACTCTCTGCAAACATCCATGCCAGGAAACAAAGCCCAGGAGCCCG	NM_016519.4		0.0172766
ILMN_2397406	0.965439	0.807	AMELX	0.247149	-5.79275	0.124394	6715562	AMELX	GTGATCCCCCAGCAACCAATGATGCCCGTTCCTGGCCAACACTCCATGAC	NM_001142.2		0.0931265
ILMN_3307916	0.855714	0.103	BMPER	1.70739	-4.52378	0.551668	197304753	BMPER	GGAGATTGGTGACCGGCCCTAATGGTGCATGAAAAGCGAGTGATAGGCTG	NM_133468.3		0.987163
ILMN_1702371	0.964933	0.801	BMPER	0.255118	-5.79084	0.0470129	38327519	BMPER	GCCATCTCTGATGGGAGAGGGTGAGGAAATCAGCTGAATGGTTGGCCTGC	NM_133468.2		0.0963675
ILMN_3242325	0.950052	0.344	BSPH1	0.969128	-5.38254	0.161876	194097419	BSPH1	TCCCTTCTGGTACAGACGCTTGATCTACTGGGAGTGTACTGATGATGGGG	NM_001128326.2		0.463442
ILMN_2118621	0.950052	0.367	CDCP2	0.922262	-5.4231	0.206272	72384338	CDCP2	ACATGGTGCTTGTTTTTCCTCACTCAACAGGAAGCCTGGAGCTAGGCAGC	NM_201546.2		0.435334
ILMN_1723847	0.950052	0.29	CILP	-1.0876	-5.27201	-0.339111	51944961	CILP	CCCATGCTACTGATTGGCACGTGGCCCCCACAATGGCACAATAAAGCCCC	NM_003613.2		0.537602
ILMN_2167758	0.951384	0.654	CILP	-0.454345	-5.72353	-0.200061	51944961	CILP	CCCTTTGCATTCGCTTTTGTTCTTGCTAGAAACCCAGTGTAGCCCAGGGC	NM_003613.2		0.184422
ILMN_1684468	0.975727	0.868	CILP2	-0.168463	-5.8084	-0.0558212	145699138	CILP2	TTGATGGTTCCTCTGACGGCTTCTCCAGAGAGATGAAGGCTGATGCCGGC	NM_153221.2		0.0614803
ILMN_1711514	0.955042	0.696	COCH	-0.396027	-5.74709	-0.103022	4758021	COCH	CAACAGCCATTTAGGCAAATAAGCACTCCTTTAAAGCCGCTGCCTTCTGG	NM_004086.1		0.157391
ILMN_2180848	0.956211	0.731	COCH	0.348157	-5.76405	0.092415	4758021	COCH	GAACACAGCTCTTTAACATGGTTCAGGTACACATATTTTGACCCAAGTGG	NM_004086.1		0.136083
ILMN_1695991	0.943889	0.213	COLQ	-1.28534	-5.06296	-0.334596	116805308	COLQ	GGCCTGGGGAGATGTTGTTTTCATGCTGCTTCCACCATCACACTGGGGTT	NM_080544.2		0.67162
ILMN_1728707	0.950052	0.346	COLQ	0.96444	-5.38668	0.27537	18105017	COLQ	CAGCCTCGCTCATCTGCTCATCATTTCAGGACTGCTCTGTTACTCGGCAG	NM_080538.1		0.460924
ILMN_1670872	0.950052	0.596	COLQ	0.539062	-5.6837	0.102383	116805312	COLQ	AGAACTCCTTGCACATTACCAAGACGGCCCCCAGTGCCATGTGGACAAGG	NM_080542.2		0.224754
ILMN_2329114	0.950925	0.64	COLQ	0.474177	-5.7148	0.200038	116805305	COLQ	CGTGCATGTCTGTGAGCTGCCTTTCATCACCATTTTTCCTGAGTAGGGCT	NM_080539.2		0.19382
ILMN_1677636	0.950052	0.274	COMP	-1.12383	-5.23596	-0.716064	40217842	COMP	AGAGGACTATGAGACCCATCAGCTGCGGCAAGCCTAGGGACCAGGGTGAG	NM_000095.2		0.562249
ILMN_1659541	0.950052	0.374	CRELD1	0.909996	-5.43341	0.166387	116875822	CRELD1	CACGGCACCTTAGAACAGACCTTTTTCTTTCTCGCGTGGGGCCTGACTCC	NM_015513.3		0.427128
ILMN_2404548	0.950052	0.573	CRELD1	-0.572447	-5.66619	-0.149586	116734854	CRELD1	AGGCATCAGTCTTACTACCTGTCCCACCACCCCCACCTTAGGGAAATGTC	NM_001077415.1		0.241845
ILMN_1739558	0.950925	0.635	CRELD1	-0.482695	-5.71094	-0.251834	116734858	CRELD1	GGTGGCTGCTAGAGCTTTGGCCCCTGCTTAGGATTAGGTGGTCCTCACAG	NM_001031717.2		0.197226
ILMN_1808613	0.996621	0.982	CRELD1	0.0231009	-5.82175	0.0109555	72534727	CRELD1	GAAGCTACTTTCCCAGGGCTATATGGCAAGCAAGTCGCAAAGCTGGGATC	NM_001031717.1		0.00788851
ILMN_1748707	0.950052	0.572	CRELD2	-0.575179	-5.66471	-0.112922	31543145	CRELD2	TATTCAGAAGGATGTCCCGTGGAAAATGTGGCCCTGAGGATGCCGTCTCC	NM_024324.2		0.242604
ILMN_2146418	0.950052	0.495	CRIM1	0.694271	-5.59375	0.141721	10092638	CRIM1	AACGTGACAGGAAGAGGAGGGAGAGGGTGACGAACACCAGGCATTTCCAG	NM_016441.1		0.305395
ILMN_1753910	0.886496	0.132	CRISPLD1	-1.56824	-4.71454	-0.48727	52694670	CRISPLD1	GGTCCTTACTGCTCCTCCCACAACAGGGAAGCCCGATCAGTTCTGTCAGT	NM_031461.3		0.879426
ILMN_2151522	0.950052	0.323	CRISPLD1	1.01289	-5.34303	0.175596	52694670	CRISPLD1	AGTCTTGTTCATATTGTTTACCTATCTTCTACACAAGGCGTGTCCTTGGG	NM_031461.3		0.490797
ILMN_1790689	0.734807	0.0451	CRISPLD2	2.13619	-3.86696	0.721504	142374443	CRISPLD2	ACGGCGTTCCTGGCTCTCCTGCCCACAGGATGAACATTTTCGGCTTCCTT	NM_031476.2		1.34582
ILMN_2115125	0.988845	0.939	CTGF	0.0776171	-5.81911	0.0132562	98986335	CTGF	TTGCAAAGGGGAGGCATCAGTGTCCTTGGCAGGCTGATTTCTAGGTAGGA	NM_001901.2		0.0273344
ILMN_1725090	0.950052	0.222	CTHRC1	-1.26042	-5.09093	-0.579377	34147546	CTHRC1	AGGACTTTGTGAAGGAATTGGTGCTGGATTAGTGGATGTTGCTATCTGGG	NM_138455.2		0.653647
ILMN_2117508	0.950052	0.55	CTHRC1	-0.608384	-5.64621	-0.120474	34147546	CTHRC1	CAGATTACCCAAAAGGAGATGCTTCTACTGGATGGAATTCAGTTTCTCGC	NM_138455.2		0.259637
ILMN_2188264	0.486616	0.00933	CYR61	2.87398	-2.55476	1.33972	34222286	CYR61	GAAACTGCCAAGGGTGCTGGTGCGGATGGACACTAATGCAGCCACGATTG	NM_001554.3		2.03012
ILMN_2207419	0.950052	0.417	DDX26B	-0.829527	-5.49792	-0.147329	94536742	DDX26B	TCTCTGTGGGAAGGGGCAGGGAGAGTCACCAAACAATCTACCTCCAACTC	NM_182540.3		0.379864
ILMN_2410612	0.929535	0.193	DMBT1	1.34614	-4.9928	0.292776	8923739	DMBT1	GAGAGTTCTGACCTGGATGGCCCATAGACCTGACGTCCCAGAATCCATGC	NM_017579.1		0.714443
ILMN_1681612	0.964899	0.801	DMBT1	0.255783	-5.79068	0.0471067	148539841	DMBT1	AGTCCCAGTCAACGCCCAGGCCAGATACTTGGCTGACCACCAACTTACCG	NM_007329.2		0.0963675
ILMN_2300022	0.950052	0.482	DMP1	0.716315	-5.57923	0.127162	121256627	DMP1	CAGAGAGCTATGAACACGATATCTATCTGGGAACACTGAGAAGGGTGACC	NM_004407.2		0.316953
ILMN_1708107	0.950052	0.363	DPT	0.930716	-5.41592	0.486923	32307171	DPT	CTGGCAGACACCCTGGAACCCTGGGGAGCTACTGGCAAACTCTCCTGGAT	NM_001937.3		0.440093
ILMN_1694839	0.950925	0.647	DSPP	-0.464701	-5.71902	-0.114385	111119006	DSPP	CAGTGACAGTGACAGTGAAGGCAGTGACAGTAACCACTCAACCAGTGATG	NM_014208.3		0.189096
ILMN_1658333	0.950408	0.625	ECM1	0.496716	-5.70444	0.184846	12707564	ECM1	AGTTCCAGCGCTGCTGCCGCCAGGGGAACAATCACACCTGTACATGGAAG	NM_004425.2		0.20412
ILMN_2329735	0.950408	0.627	ECM1	-0.493204	-5.70608	-0.120831	12707571	ECM1	TGAGCCCAAGGAAGAATGAGTCACCCCAGAGCCCTAGAGGGTCAGATGGG	NM_022664.1		0.202732
ILMN_2228938	0.950052	0.246	ECM2	-1.19377	-5.16347	-0.487159	53759132	ECM2	GCACCACTGGTCATAGCATCTATCTCCTTTGCCTTAATTTACTGAAATAC	NM_001393.2		0.609065
ILMN_1746763	0.964782	0.8	ECM2	-0.256673	-5.79046	-0.0971041	53759132	ECM2	CCAGATTGAACGGATCCCTGGCTATGTGTTTGGCCACATGGAACCAGGCC	NM_001393.2		0.09691
ILMN_1689976	0.950052	0.248	EDIL3	-1.19076	-5.16667	-0.262795	31317223	EDIL3	TCTTATTGAGATTTGAAACTGGTGGTAGTTTCCCAGGAAGGCACAGGTGG	NM_005711.3		0.605548
ILMN_1735877	0.919605	0.169	EFEMP1	-1.42541	-4.89736	-0.451999	86787911	EFEMP1	TCCTGGCATCCAGAGTGACAGTGAACTTAAGCAAATTACCCTCCTACCCA	NM_004105.3		0.772113
ILMN_1673880	0.950052	0.224	EFEMP1	1.25388	-5.0982	0.589055	86787911	EFEMP1	CTCTGGCGCTGGTCAAGTCACAGGACACCGAAGAAACCATCACGTACACG	NM_004105.3		0.649752
ILMN_2350634	0.950052	0.434	EFEMP1	0.798099	-5.52161	0.124452	86788014	EFEMP1	ACCGATGTGTTTGCCCAGTCTCAAATGCCATGTGCCGAGAACTGCCCCAG	NM_001039348.1		0.36251
ILMN_1653203	0.822991	0.08	EFEMP2	-1.84339	-4.32612	-0.312928	88703037	EFEMP2	AAACTCCACTCTGGACAGCGCCAGGAGGCCCTGGGTTCCATTCCTAACTC	NM_016938.2		1.09691
ILMN_2384770	0.246592	0.00142	EGFLAM	3.69415	-0.94986	1.90523	33469934	EGFLAM	GAGAGGGCTCGTGGGCTGTATCTCTCACTTCACCCTGTCCACCGATTACC	NM_182799.1		2.84771
ILMN_1759487	0.405412	0.00516	EGFLAM	3.13581	-2.05278	1.59512	33469936	EGFLAM	TCTCCCTGTTCTCTTTCATGCTGGCACCGGGCAGAGTGTGGGAACTACTG	NM_182801.1		2.28735
ILMN_1654109	0.722846	0.0419	EGFLAM	2.17199	-3.80797	1.08792	33469936	EGFLAM	GGCCCTTGGATTGTTCGGATTAACCCCTTCCACTCCTCACTGGCTGGTTC	NM_182801.1		1.37779
ILMN_1711346	0.98391	0.904	EGFLAM	-0.121516	-5.81492	-0.0457545	33469928	EGFLAM	GTGGCCCTGTCTTGGAAACCTGGAGCGAGTGAAGGAAGCGCCCCTATTCA	NM_152403.2		0.0438316
ILMN_2385672	0.822991	0.0798	ELN	-1.8446	-4.32431	-0.98239	126352445	ELN	ACCCAAGCACCTGAAGCCTCAAAGCTGGATTCGCTCTAGCATCCCTCCTC	NM_001081754.1		1.098
ILMN_1757506	0.965182	0.804	ELN	0.250959	-5.79184	0.0983726	126352445	ELN	TAAAGCAGCCAAATATGGAGCAGCAGTGCCTGGGGTCCTTGGAGGGCTCG	NM_001081754.1		0.094744
ILMN_1747499	0.831261	0.0854	EMID1	1.80883	-4.37735	0.939923	50511940	EMID1	ATCTGCTGTCTGAGCATCCAGGCCCAAAGGCACTGAGGGAGTCAGGAGCT	NM_133455.2		1.06854
ILMN_1711439	0.03397	2.2e-05	EMILIN1	-5.4868	2.56954	-2.24471	5901943	EMILIN1	GCCGCCCATGCAGACTTTTGGCCTGGCGCGATCCCCCAAGAACCCCTCCA	NM_007046.1		4.65758
ILMN_1697268	0.950408	0.625	EMILIN2	-0.495705	-5.70491	-0.140168	60498977	EMILIN2	ACTTAACCTGCTCAGGCGGGCCTTCGCCCAGCTGCAAATAGGGATGCGTT	NM_032048.2		0.20412
ILMN_1795266	0.950052	0.242	EMILIN3	-1.20546	-5.15099	-0.299922	45433500	EMILIN3	GGTGATGCCCACTGGAACTCTCCTCACACCTGGCAGCTTCATGGATGTTG	NM_052846.1		0.616185
ILMN_1672536	0.92654	0.189	FBLN1	-1.35826	-4.9785	-0.230322	34734065	FBLN1	TCACCAGGGGAATGGCTGGGATTTCTCGGCACTCTGCATCATCCATCTTT	NM_006486.2		0.723538
ILMN_1700541	0.950052	0.509	FBLN1	0.671683	-5.60819	0.422979	34734061	FBLN1	TCAAGATGGATCTCTCTCGCCACGGCACCGTCAGCTCCTTTGTGGCCAAG	NM_001996.2		0.293282
ILMN_1722713	0.950052	0.545	FBLN1	0.614949	-5.64244	0.240668	34734067	FBLN1	CCGTGGGCTTCCGGCTCTCTGTGGATGGCAGGTCATGTGAAGACATCAAT	NM_006487.2		0.263603
ILMN_1710815	0.955706	0.719	FBLN1	-0.365238	-5.75824	-0.0707572	34734067	FBLN1	CCACTTCCATTTGATGATGGAATGCTGCTGTTCATGACCAACTTTATGGC	NM_006487.2		0.143271
ILMN_1686952	0.960387	0.777	FBLN1	-0.287607	-5.78241	-0.111745	154091330	FBLN1	GCAGACTTGGCTCAGAAGTCACCTCCTCAGTGCAGTTAGCCTGAGCTCCC	NM_006485.3		0.109579
ILMN_1721769	0.900495	0.144	FBLN2	1.52021	-4.77754	0.456587	51873052	FBLN2	CCGGCGACAGTTCTGTGTGAACACCCTGGGATCCTTCTACTGTGTCAACC	NM_001004019.1		0.841638
ILMN_1774602	0.955042	0.701	FBLN2	-0.389726	-5.74944	-0.243782	51873054	FBLN2	CATGTTGGGGCTCTTGGACTCCTCTGGATGACCCGTCCCCAAAGTTGACA	NM_001998.2		0.154282
ILMN_2390919	0.994004	0.97	FBLN2	0.0379129	-5.82131	0.0166662	51873054	FBLN2	CAGAGACACGCGACCATGTTGGGGCTCTTGGACTCCTCTGGATGACCCGT	NM_001998.2		0.0132283
ILMN_2223941	0.925383	0.186	FBLN5	-1.36772	-4.96725	-0.279313	19743802	FBLN5	GCTGGCGGGGAACCCTGGGAGTAGCTAGTTTGCTTTTTGCGTACACAGAG	NM_006329.2		0.730487
ILMN_1664176	0.980477	0.889	FBLN5	-0.141534	-5.8124	-0.0376545	19743802	FBLN5	AGAATGAGAGCGACACAGACGTTAGGCATTTCCTGCTGAACGTTTCCCCG	NM_006329.2		0.0510982
ILMN_1735743	0.998679	0.991	FBLN7	0.0113259	-5.82194	0.00312779	23397470	FBLN7	GCTGGGGAGAGAAAAGGTGGCAATGTGTGTCAGGTGACTATCAGCCCTTC	NM_153214.1		0.00392635
ILMN_1783182	0.714287	0.0408	FBN1	-2.18607	-3.78463	-0.592257	93589095	FBN1	GTTTACCCCTTGGCTTTGTGTTCTTGCATGGATTTGGGGTTGGAGGGGCC	NM_000138.3		1.38934
ILMN_1670899	0.947343	0.217	FBN2	-1.2737	-5.07608	-0.492901	66346694	FBN2	GGCCAAAGCACATGCAGGCTCCTGGTTGTTCCTCTCAAACCTGTGCTGAC	NM_001999.3		0.66354
ILMN_2381945	0.495255	0.01	FGA	2.84283	-2.61351	0.863997	70906433	FGA	GGCCGGAAGTGAAGCCGATCATGAAGGAACACATAGCACCAAGAGAGGCC	NM_021871.2		2
ILMN_1656487	0.831261	0.0865	FGA	1.80227	-4.38699	0.313134	70906433	FGA	TCCTTGGGGGCAGGGCCTTTGTCTGTCTCATCTCTGTATTCCCAAATGCC	NM_021871.2		1.06298
ILMN_2280203	0.950052	0.54	FGA	0.623104	-5.63769	0.11896	70906432	FGA	GTCTTTTGCTATGGAGCAAATCCAGGAAGGCAAGAGAAACATTCTTTCCT	NM_000508.3		0.267606
ILMN_2114972	0.722846	0.0423	FGB	2.16787	-3.8148	0.693295	70906434	FGB	CAAATAAGGAAGAGGGGTCTTTTATCCTTGTCGTAGGAAAACCATGACGG	NM_005141.2		1.37366
ILMN_1678049	0.950052	0.253	FGB	1.1763	-5.18193	0.606854	70906434	FGB	GATGTCATGCAGCCAATCCAAACGGCAGATACTACTGGGGTGGACAGTAC	NM_005141.2		0.596879
ILMN_1703188	0.950052	0.475	FGG	0.728032	-5.57133	0.13038	70906436	FGG	CGTTTCAAAAGAGATTTACTTTTTTAAAGGACTTTATCTGAACAGAGAGA	NM_000509.4		0.323306
ILMN_1737683	0.950052	0.573	FGG	0.572839	-5.66598	0.107814	70906438	FGG	CAGACCAGAGCACCCTGCGGAAACAGAATATGACTCACTTTACCCTGAGG	NM_021870.2		0.241845
ILMN_2315044	0.95755	0.753	FGG	0.319219	-5.77326	0.153807	70906436	FGG	GCTGAACAGGATGGATCTGGTTGGTGGATGAACAAGTGTCACGCTGGCCA	NM_000509.4		0.123205
ILMN_2366192	0.950052	0.259	FGL1	-1.16262	-5.19622	-0.48089	42544201	FGL1	GTCACTCTGCAAACCTGAATGGTGTATACTACAGCGGCCCCTACACGGCT	NM_201553.1		0.5867
ILMN_1672872	0.950052	0.365	FGL1	0.926883	-5.41918	0.156779	42544188	FGL1	TGGCTGGGCAATAAAAATCTTCACTTCTTGACCACTCAAGAAGACTACAC	NM_004467.3		0.437707
ILMN_1682828	0.95494	0.69	FGL1	0.405	-5.74367	0.074866	42544188	FGL1	TTCCCTTGCGGGGAATTTTCATCCTGAGGTGCAGTGGTGGGCTAGTCACC	NM_004467.3		0.161151
ILMN_2326197	0.963347	0.79	FGL1	-0.270251	-5.78704	-0.0752232	42544199	FGL1	CCGGGTCAAACAGCAACAGGTCAAGATCAAGCAGCTTTTGCAGGAGAATG	NM_201552.1		0.102373
ILMN_1693009	0.913199	0.162	FGL2	-1.45218	-4.86413	-0.285515	5730074	FGL2	CCTTCTGGGAACTGTGGGCTGTACTACAGTTCAGGCTGGTGGTTTGATGC	NM_006682.1		0.790485
ILMN_2366463	0.564211	0.0155	FN1	-2.64364	-2.9834	-0.596577	47132548	FN1	TCGGGGCAGGTGGAAGTGTGATCCCGTCGACCAATGCCAGGATTCAGAGA	NM_212474.1		1.80967
ILMN_1778237	0.84445	0.0936	FN1	-1.75987	-4.44877	-0.367967	47132558	FN1	GCAGGTGGAAGTGTGATCCCGTCGACCAATGCCAGGATTCAGAGACTGGG	NM_002026.2		1.02872
ILMN_1675646	0.964933	0.801	FN1	0.255293	-5.7908	0.0416876	47132546	FN1	TCCCAGCTTTTGAGCCAACAACTCTGATTAACTATTCCTATAGCATTTAC	NM_054034.2		0.0963675
ILMN_2163873	0.925383	0.182	FNDC1	-1.38253	-4.94953	-0.60695	66793377	FNDC1	TCCAGGAATAGCATATGCACGCTGTTCTTGCTTCATGGAATGCTACATGC	NM_032532.1		0.739929
ILMN_1734653	0.950052	0.587	FNDC1	-0.55266	-5.67669	-0.399781	148806907	FNDC1	GGCCATTCTGGTCATCTCAGTCTGGAACTCAGTCCCACTTCTTGGCCTGG	NM_032532.2		0.231362
ILMN_1742179	0.961566	0.784	FNDC7	0.278354	-5.78491	0.0503488	27734936	FNDC7	GCTGCCAGGGCAACCTGAGATAACAAACGCCCTCATCGCAAGTTAGGAGC	NM_173532.1		0.105684
ILMN_1682221	0.742303	0.0477	FNDC8	2.10801	-3.91299	0.564566	62234418	FNDC8	CCCAGGACACCCCTCACCTACTTTCAGCTTCAACCCCAGGCCCTCAGAAA	NM_017559.2		1.32148
ILMN_1806667	0.950052	0.563	FRAS1	-0.588458	-5.65743	-0.214704	108773803	FRAS1	GCTTTGCTGCCCTTTTATTGTACCCCAGGCCTCCTAGAGGACTCCTGCAG	NM_025074.4		0.249492
ILMN_1784749	0.952229	0.663	GAS6	0.442603	-5.72853	0.0804081	4557616	GAS6	GCTGAGAGCTGGGCTTTCCTCTGTGACCATCCCGGCCTGTAACATATCTG	NM_000820.1		0.178486
ILMN_1768260	0.95755	0.749	GAS6	0.324924	-5.7715	0.0701714	4557616	GAS6	CGAGGAGGCGCGGGAGGTGTTCGAGAACGACCCCGAGACGGATTATTTTT	NM_000820.1		0.125518
ILMN_1779558	0.993306	0.963	GAS6	0.046366	-5.82097	0.00866111	4557616	GAS6	GCCATGCTGAGAGCTGGGCTTTCCTCTGTGACCATCCCGGCCTGTAACAT	NM_000820.1		0.0163737
ILMN_1704376	0.907372	0.151	GLDN	-1.49266	-4.81298	-1.03259	98986320	GLDN	GATAGGGCTTTGCGTTTTCATCCAGATGCTGTGGCCCTGTGTTTCACAGC	NM_181789.2		0.821023
ILMN_1677308	0.950052	0.343	HMCN1	-0.970425	-5.38139	-0.271721	118572605	HMCN1	CACGTCAATACACTGTACATGGTGGTAATAGACTCTAAGCAATTGCCAAG	NM_031935.2		0.464706
ILMN_1719194	0.950052	0.547	IBSP	0.612579	-5.6438	0.112902	13259536	IBSP	CGGGGAACCTCGTGGGGACAATTACCGAGCCTATGAAGATGAGTACAGCT	NM_004967.2		0.262013
ILMN_2188966	0.95493	0.687	IGFALS	0.408815	-5.7422	0.0747561	4826771	IGFALS	GTGCACTTGCTGGAAGACGCAAGGGCCTGATGGGGTGGAAGGCATGGCGG	NM_004970.1		0.163043
ILMN_2387385	0.42514	0.00599	IGFBP1	3.07026	-2.17968	0.951681	61744448	IGFBP1	ATGGATGGAGAGGCGGGACTCTGCTGGTGCGTCTACCCTTGGAATGGGAA	NM_001013029.1		2.22257
ILMN_1728445	0.950052	0.392	IGFBP1	0.874871	-5.46224	0.152568	61744447	IGFBP1	ACCCTTGGAATGGGAAGAGGATCCCTGGGTCTCCAGAGATCAGGGGAGAC	NM_000596.2		0.406714
ILMN_1725193	0.803797	0.0699	IGFBP2	-1.91398	-4.21944	-0.480027	55925575	IGFBP2	CAAACACCGGCAGAAAACGGAGAGTGCTTGGGTGGTGGGTGCTGGAGGAT	NM_000597.2		1.15552
ILMN_1746085	0.950052	0.286	IGFBP3	-1.09713	-5.26262	-0.559092	62243067	IGFBP3	GATACAACTGTGGCCATGACTGAGGAAAGGAGCTCACGCCCAGAGACTGG	NM_000598.4		0.543634
ILMN_2396875	0.950052	0.435	IGFBP3	0.796234	-5.52298	0.396653	62243247	IGFBP3	CGGAGGCCAAACCCAAGAAGGTCTGGCAAAGTCAGGCTCAGGGAGACTCT	NM_001013398.1		0.361511
ILMN_1665865	0.950052	0.451	IGFBP4	0.768001	-5.54349	0.136248	62243289	IGFBP4	ACCGGGATGAACCTATCCTTCCAGTGGCTCGCTCCCTGTAGCTCTGCCTC	NM_001552.2		0.345823
ILMN_1750324	0.995373	0.976	IGFBP5	0.0299903	-5.82157	0.00515045	46094066	IGFBP5	GCACAGTTGTCAGACAAGATTCCTTCAGATTCCGAGTTGCCTACCGGTTG	NM_000599.2		0.0105502
ILMN_2132982	0.998406	0.99	IGFBP5	-0.0129232	-5.82192	-0.00181754	46094066	IGFBP5	CACCTGAATGCGGAAGAGCTCGGCTCCCGTTTAGCATTTTGTACTTAAGG	NM_000599.2		0.00436481
ILMN_1669362	0.967927	0.821	IGFBP6	0.229819	-5.7967	0.0808728	49574524	IGFBP6	GCAACTCCAGACTGAGGTCTACCGAGGGGCTCAAACACTCTACGTGCCCA	NM_002178.2		0.0856568
ILMN_2062468	0.986156	0.919	IGFBP7	-0.103436	-5.81687	-0.0215833	4504618	IGFBP7	CTATGGAGTTCAAAGGACAGAACTCCTGCCTGGTGACCGGGACAACCTGG	NM_001553.1		0.0366845
ILMN_1677158	0.950052	0.448	IGFBPL1	0.774123	-5.5391	0.148601	56090547	IGFBPL1	GGAGCTGCCTGGGGACCATGTCAATATAGCTGTCCAAGTGCGAGGGGGCC	NM_001007563.1		0.348722
ILMN_1682100	0.950052	0.431	IGSF10	0.804038	-5.51719	0.247919	38490687	IGSF10	GCCAGTTATTCTTACCTATGCACCAGGGACAGTAAAAGGCATCAGTGGAG	NM_178822.3		0.365523
ILMN_1696434	0.950052	0.563	LAMA1	-0.588151	-5.6576	-0.388974	38788415	LAMA1	GGGAACGCAGTTGGCGCTGAAAGTCCACACACCCAGTCTACCTCAGTGGA	NM_005559.2		0.249492
ILMN_1770038	0.950052	0.593	LAMA1	-0.54268	-5.68185	-0.253709	38788415	LAMA1	GCACGTTCGCCTCCAGCGGCCTGATTTACTACATGGCTCATCAGAACCAA	NM_005559.2		0.226945
ILMN_1788019	0.530186	0.0128	LAMA2	-2.72986	-2.82461	-0.671301	119466531	LAMA2	GGCCCCTGCCGATCTGGAACAACCCACCTCCAGCTTCCATGTTGGGACAT	NM_001079823.1		1.89279
ILMN_2339266	0.950052	0.511	LAMA2	0.669226	-5.60973	0.259635	119466530	LAMA2	GCGGGCAGATTCACTGCTGTCTATGATGCTGGGGTTCCAGGGCATTTGTG	NM_000426.3		0.291579
ILMN_1688892	0.937302	0.203	LAMA3	1.315	-5.02906	0.808769	38045909	LAMA3	AGATCCCCTTCCCACCTGCCAGCACTCAAGAGCCACTACACCTTGGAGGT	NM_198129.1		0.692504
ILMN_1704247	0.950052	0.453	LAMA3	0.764871	-5.54572	0.367135	38045907	LAMA3	TCTGGGCTACAGTTCACAGCAGCAAAGGGTGCCATTTCTTCAGCCTCCCG	NM_000227.2		0.343902
ILMN_2406035	0.98391	0.904	LAMA3	-0.122021	-5.81486	-0.0387412	38045909	LAMA3	GCACTCGGTGGCAGTCACCATAAAACAACACATCCTGCACCTGGAACTGG	NM_198129.1		0.0438316
ILMN_2293594	0.994545	0.971	LAMA3	0.03622	-5.82137	0.0108627	38045909	LAMA3	GTGCGCATCCAAGGCCTCTACTTCACAGAGACTCAAAGGCTCACCCTGAG	NM_198129.1		0.0127808
ILMN_1795442	0.660053	0.0304	LAMA4	-2.3285	-3.54364	-1.04869	9845494	LAMA4	CCTTCACAGGCTGCATACGCCACTTTGTGATTGATGGACACCCAGTGAGC	NM_002290.2		1.51713
ILMN_2140059	0.970541	0.842	LAMA4	-0.202216	-5.80241	-0.0530373	9845494	LAMA4	GGAAGCTTTCATCGAGTTGAACAGGACTTAAACGAATCATCAGGGACCGG	NM_002290.2		0.0746879
ILMN_1773567	0.950052	0.304	LAMA5	-1.05516	-5.3034	-0.16374	21264601	LAMA5	CCTTGTGCTCGCCTCATAGGTGTCTATTTGGACTCTAAGCTCTACGGGTG	NM_005560.3		0.517126
ILMN_2214790	0.189427	0.000716	LAMB1	-3.98608	-0.36534	-1.00466	4504950	LAMB1	AGCTCAAGAATTAGCAAGACTGGAAGGAGAAGTCCGTTCACTCCTAAAGG	NM_002291.1		3.14509
ILMN_1658709	0.638612	0.0269	LAMB1	-2.38717	-3.44199	-0.388878	4504950	LAMB1	GAATGTGGAAGAACTTAAGCGGAAAGCTGCCCAAAACTCCGGGGAGGCAG	NM_002291.1		1.57025
ILMN_1752968	0.950052	0.276	LAMB2	-1.11888	-5.24094	-0.180233	119703754	LAMB2	GGAAGGCACCTATGAGGAAAATGAGCGGGCACTGGAGAGTAAGGCAGCCC	NM_002292.3		0.559091
ILMN_1800142	0.95755	0.758	LAMB3	0.312651	-5.77524	0.0929342	62868216	LAMB3	TTCCAAGCTACAAATGTATCTGCTGCTCCAAGTGTCCTAGATCAGGACCC	NM_001017402.1		0.120331
ILMN_1680054	0.969821	0.833	LAMB3	0.213134	-5.80024	0.0877342	62868214	LAMB3	GGGAGACCCCCACATTCAAGAGGAGCTTTCAGGCGATCTGGAGAAAGAAC	NM_000228.2		0.079355
ILMN_1715684	0.985591	0.915	LAMB3	-0.108432	-5.81636	-0.0511645	62868214	LAMB3	ACAGCTTCCAGCCCGTTGCCCCACTCATCTGCCGCCTTTGCTTTTGGTTG	NM_000228.2		0.0385789
ILMN_1810852	0.979317	0.883	LAMC1	0.148561	-5.81142	0.0331844	9845497	LAMC1	TATGTGCCTTCACTTTAGCTGTTTGCCTTACTCTACAGCCTTGCTCTCCG	NM_002293.2		0.0540393
ILMN_1701424	0.890284	0.135	LAMC2	-1.55822	-4.7278	-0.954128	5031846	LAMC2	ACACCAGTGGGAATTGCTGGAGGAACCAGAGGCACTTCCACCTTGGCTGG	NM_005562.1		0.869666
ILMN_1653824	0.950052	0.45	LAMC2	-0.770912	-5.54141	-0.359311	5031846	LAMC2	CGCTGGGGTTACAATCCAAGACACACTCAACACATTAGACGGCCTCCTGC	NM_005562.1		0.346787
ILMN_1706519	0.962627	0.788	LAMC2	0.272802	-5.78638	0.05414	9845499	LAMC2	GGAGCCTGCTCTAAGGCAGTAGAATGGTGGCTGGGAAGATGTGAAGGAAG	NM_018891.1		0.103474
ILMN_1688642	0.822991	0.0807	LAMC3	-1.83871	-4.3331	-0.447869	110611155	LAMC3	AGTGCACACTCTCACCCCTGCACATGCATAAACGGGCACACCCCAGTGTC	NM_006059.3		1.09313
ILMN_2171023	0.950052	0.539	LGI1	0.624439	-5.63691	0.105654	4826815	LGI1	GAGACTGCTAGAACCAAGCACTACCAGTATCTCCATCCTTAACTGTCCAG	NM_005097.1		0.268411
ILMN_1788728	0.950925	0.63	LGI1	0.489497	-5.70781	0.0898654	4826815	LGI1	ATGGGGAGGCTCCTCGTTCCAGGATATTCAGAGGATGCCATCGCGAGGAT	NM_005097.1		0.200659
ILMN_1767900	0.950052	0.579	LGI2	-0.564436	-5.67048	-0.193625	21313637	LGI2	GGGCCTCTCTGGTATGGGCAATAGGCAAGCTCCTGGGGTCTGGTTATGTG	NM_018176.2		0.237321
ILMN_1737162	0.953598	0.674	LGI3	0.426241	-5.73528	0.0815034	45643139	LGI3	TGAGTTACCTGCGAGGGTGCCCAGAGTGGAGCTTGGCCTGAGGGCGTGTT	NM_139278.2		0.17134
ILMN_1716461	0.950052	0.575	LGI4	0.56932	-5.66787	0.220482	21281672	LGI4	TGCAGGCTGGTGCACTGCATGGAGTCGAGGTGGAGGTCACGTGCAGAGCT	NM_139284.1		0.240332
ILMN_1805228	0.999134	0.994	LRG1	-0.0081756	-5.82197	-0.0013938	49574519	LRG1	CACACTGGGGCTGCCTTTCTCTGACTCTGTCTTCCCCAAGTCAGGGGGCT	NM_052972.2		0.00261362
ILMN_1656321	0.778238	0.0604	LTBP1	1.98915	-4.10295	0.847712	46249413	LTBP1	CCCCCAGCAGATACATTCTCAAGTGACTCCTCTTTCTTCCCAGAGTGTGG	NM_206943.1		1.21896
ILMN_1785402	0.950052	0.258	LTBP1	-1.16421	-5.19457	-0.34575	46249411	LTBP1	GGATACTAAGCTGATGTGTTTGTTGTTCTTTTTCTCCCTGCCTCCGCTCC	NM_000627.2		0.58838
ILMN_3248591	0.950052	0.301	LTBP2	-1.06225	-5.2966	-0.312364	46389563	LTBP2	GGTGGTTTGTGGGGAGGGTGACAGGGTGGATAGGTACAGGATTGGGAGAC	NM_000428.2		0.521434
ILMN_1805395	0.924455	0.18	LTBP3	1.38828	-4.94261	0.80998	18497287	LTBP3	TGAGGACAGTTCAGAGGAGGATTCAGACGAGTGTCGCTGCGTGAGTGGCC	NM_021070.2		0.744727
ILMN_1777121	0.950052	0.472	LTBP3	-0.73289	-5.56802	-0.216265	18497287	LTBP3	ACAGTGCATTGCAGACAAACCGGAGGAGAAGAGCCTGTGTTTCCGCCTGG	NM_021070.2		0.326058
ILMN_1737107	0.956211	0.732	LTBP3	-0.347093	-5.7644	-0.210467	18497287	LTBP3	ATGGTGACTGCCTCAACAACCCTGGCTCCTATCGCTGTGTCTGCCCACCT	NM_021070.2		0.135489
ILMN_2352917	0.955042	0.691	LTBP4	0.402612	-5.74459	0.12689	110347411	LTBP4	ATATGGGCCTGAGTTGTACCCACCACCTGCGCTACCCTACGACCCCTACC	NM_003573.2		0.160522
ILMN_1665219	0.970297	0.839	LTBP4	-0.205834	-5.8017	-0.0313275	110347436	LTBP4	TGGACCTGGAGAAGGGACCTACGGACGCCTGGAAGCTGCGACGCCCTGCA	NM_001042545.1		0.076238
ILMN_2061116	0.950925	0.642	MATN1	-0.471936	-5.71581	-0.154698	13518035	MATN1	GAGTGTGAGAGTGATAATGCAGGGGTGAGTGTGAGAGGGACTGCGTTTGC	NM_002379.2		0.192465
ILMN_1694840	0.948448	0.219	MATN2	-1.26968	-5.08059	-0.252603	62548859	MATN2	CTGTGGACACAACTTGCTTCTGCCTCATCCTGCCTTAGTGTGCAATCTCA	NM_002380.3		0.659556
ILMN_1698685	0.961464	0.782	MATN2	0.280663	-5.7843	0.085441	62548859	MATN2	AATCTGAGCCAGTCACCATAAATATCCAAGACCTACTTTCCTGTTCTAAT	NM_002380.3		0.106793
ILMN_1663171	0.929615	0.194	MATN3	1.34433	-4.99492	0.223509	111119013	MATN3	TGGGGCCGCATCCTACCACTGTGATTGCTATCCTGGCTACACCTTAAATG	NM_002381.4		0.712198
ILMN_2370099	0.950052	0.374	MATN4	0.908511	-5.43465	0.17132	13699835	MATN4	TGTTGGCCTGGTCTTCACGGATGGCCGCTCCCAGGATGACATCTCGGTGT	NM_030592.1		0.427128
ILMN_1737503	0.950052	0.448	MATN4	0.772982	-5.53992	0.137484	13699829	MATN4	GCACCACTGCGTCAATTCCCCAGGCTCCTATTTCTGTCACTGCCAAGTTG	NM_003833.2		0.348722
ILMN_1662126	0.950052	0.611	MATN4	0.516593	-5.69491	0.097902	13699835	MATN4	ACAGAGCTTCGGAGCCCATGCGAATGCGAAAGCCTCGTGGAGTTCCAGGG	NM_030592.1		0.213959
ILMN_1786072	0.979348	0.884	MEPE	-0.147722	-5.81154	-0.0553536	110815849	MEPE	CAGTCTGAAGACCTCGTCACCTGTGAGTTGATGTAGAGGAGAGCCACCTG	NM_020203.2		0.0535477
ILMN_1787981	0.950052	0.354	MFAP2	-0.948929	-5.40025	-0.65834	9665258	MFAP2	CCCTTCTCAGCCCGTTTTGAGGACAGACAGTCCCCCGAGGTAGGCTACAT	NM_017459.1		0.450997
ILMN_1659565	0.950052	0.443	MFAP2	0.781997	-5.53341	0.151727	9665258	MFAP2	ACAGTGGCTTAGGCCAGGGTGGGAGCAGTGAACGGAGTCACAAAAGAAAT	NM_017459.1		0.353596
ILMN_2245087	0.953066	0.67	MFAP2	-0.432175	-5.73286	-0.0934102	9665260	MFAP2	CAAGGGGCGGCTCCGGCGGGCGGACTCGGAGCGGGCGGCGGAGTGACCCG	NM_002403.2		0.173925
ILMN_1708782	0.950052	0.32	MFAP3	-1.02	-5.33647	-0.536539	21314642	MFAP3	CCCTCCTGCCCTTTGTGGTCTTAGGTATGGTGCTATAGGTTGCATGCGTC	NM_005927.3		0.49485
ILMN_1766914	0.925383	0.184	MFAP4	-1.37503	-4.95852	-0.328323	23111004	MFAP4	TGGCTCCTCCTTGCTCCCCTGCTGATGGTGTCCTACCCCGAACTCCAAAA	NM_002404.1		0.735182
ILMN_1733415	0.950052	0.534	MFAP5	0.63337	-5.63163	0.457861	46359073	MFAP5	TCACGAACTTGACCCTCCTACTCCACATTGCAACATTTCCATCAGACAGC	NM_003480.2		0.272459
ILMN_1756071	0.984793	0.909	MFGE8	-0.116102	-5.81554	-0.0209708	5174556	MFGE8	GGGCCCTCATGCTGGCTTTTCACCCCAGAGGACACAGGCAGCTTCCAAAA	NM_005928.1		0.0414361
ILMN_2071809	0.950052	0.525	MGP	-0.647198	-5.62332	-0.107241	49574513	MGP	CCGAGAACGCTCTAAGCCTGTCCACGAGCTCAATAGGGAAGCCTGTGATG	NM_000900.2		0.279841
ILMN_1651958	0.973589	0.855	MGP	0.184954	-5.80561	0.0303885	49574513	MGP	GGAGCCTCTCTCCCTACTGCTGCTACACAAGACCCTGAGACTGACCTGCA	NM_000900.2		0.0680339
ILMN_1660114	0.926188	0.188	MMRN1	-1.36111	-4.97511	-0.928063	45269140	MMRN1	CATAGGGCTGAGGCAGGATTTGGAATCAGGCCATGTCTTCTCCAGAGCCC	NM_007351.2		0.725842
ILMN_1715788	0.970225	0.837	MMRN2	0.208214	-5.80123	0.036524	13376090	MMRN2	CCCACATCAAGGGAGAGATCAGGTGGAGGTAATTGGATCTTGGGGGCGGT	NM_024756.1		0.0772745
ILMN_1745817	0.99057	0.947	NELL1	-0.0668916	-5.81986	-0.0430401	45269146	NELL1	TCCACCTGAGGACGGTGTTTGGAGGTTGCCTTTTGGACCTACCACTTTGC	NM_006157.2		0.02365
ILMN_1725417	0.967405	0.816	NELL2	0.236274	-5.79526	0.0738493	5453765	NELL2	CCGTGACATCCTGAACCCTGGATAGAAAGCCTGAGCCCATTGGATCTGTG	NM_006159.1		0.0883098
ILMN_1674719	0.955519	0.715	NID1	0.370226	-5.7565	0.188275	115298673	NID1	CAGCCTCGCTTTGAGGTACCCACCGTCCTGTCAGCTCCTTGACCTATGAG	NM_002508.2		0.145694
ILMN_1698706	0.626953	0.0241	NID2	-2.43874	-3.35159	-0.950297	144953894	NID2	CCTAAACCTTGACAGTTGGAGAAGCCAATGCAGAACTGATGGGAAAGGAC	NM_007361.3		1.61798
ILMN_1787186	0.713577	0.0405	NOV	-2.18957	-3.7788	-0.695666	19923725	NOV	TGAGGCCCAAAGCACTTGCTTACATCCTCTGATAGCTGTTTCAAATGTGC	NM_002514.2		1.39254
ILMN_1735762	0.950052	0.391	NPNT	-0.875968	-5.46136	-0.166127	75709197	NPNT	GAAGGTCTTCTGTCATTTAACCTGGTAAAGGCAGGGCTGGAGGGGGAAAA	NM_001033047.1		0.407823
ILMN_1692927	0.851733	0.0994	NTN1	1.72703	-4.49589	0.93839	148613883	NTN1	CGCCTGCAAGTGTCCCAAAATCAAGCCCCTCAAGAAGTACCTGCTGCTGG	NM_004822.2		1.00261
ILMN_1656040	0.950052	0.347	NTN3	0.963114	-5.38785	0.166718	5453809	NTN3	AAAGAAGTTCTGCAAGAAGGACTATGCGGTGCAGGTGGCGGTGGGTGCGC	NM_006181.1		0.459671
ILMN_3241653	0.962035	0.785	NTN3	-0.276564	-5.78539	-0.116785	5453809	NTN3	TGTGTTAAGACCCCTATCCCTGGACCCACTGAGGACAGCAGCCCTGTGCA	NM_006181.1		0.10513
ILMN_2113490	0.950052	0.24	NTN4	-1.21175	-5.14423	-0.239114	93204870	NTN4	GCGTGAAGTCTCAGCTTTGAGCTGGAGGCTAGATTCCAAGATGACAGCCA	NM_021229.3		0.619789
ILMN_1757019	0.95821	0.762	NTN4	0.306373	-5.77709	0.0536747	24475651	NTN4	GGTGTGTGAGAAAGCCTACTGAAGCAGCTGCACGGCCACTACATGTGGAC	NM_021229.2		0.118045
ILMN_3248035	0.950052	0.533	NTN5	0.633805	-5.63137	0.114392	24308064	NTN5	GCCGGAGCACTAGACGTGAGATGGGGCTGCCTCGAGCACCAACAAAGTAA	NM_145807.1		0.273273
ILMN_1767343	0.999672	0.997	NTN5	-0.00369318	-5.822	-0.00227987	24308064	NTN5	CACTGCAGAGAGCCAATCAGACGTCGCAGAGCCCCGACGACACTATGCTT	NM_145807.1		0.00130484
ILMN_1727778	0.722846	0.0423	NTNG1	2.16762	-3.81521	0.825312	54312077	NTNG1	CCCCCTCTAAAAGCGCAAGCCAGTCATACCCCTGTATATCTTAGCAGCAC	NM_014917.2		1.37366
ILMN_2189371	0.970406	0.84	NTNG1	0.204767	-5.80191	0.0881891	54312077	NTNG1	CACTGTGCAGAGATTTCTCTGTAAGGGCAACGAACGTGCTGGCATCAAAG	NM_014917.2		0.0757207
ILMN_1806448	0.919605	0.169	NTNG2	1.42632	-4.89623	0.863199	19387853	NTNG2	CCTTGGGACTCCGGTCCCCGCGCCTGCGATTTGGTTTCGTTTTTCTTTTG	NM_032536.1		0.772113
ILMN_1693939	0.950052	0.401	OIT3	0.857384	-5.47621	0.147579	22749296	OIT3	GCACTGCTGAACAATGTGGCCTGGGTGGGGTTTCATCTTTCTAGGGTTGA	NM_152635.1		0.396856
ILMN_2259155	0.950052	0.51	OTOL1	0.670978	-5.60863	0.119371	122937272	OTOL1	TTAAAGGCTCCAAGGGTGAGTTGGCTAGAGTGCCCCGGTCGGCTTTCAGC	NM_001080440.1		0.29243
ILMN_1710495	0.950052	0.301	PAPLN	-1.06121	-5.2976	-0.167073	145309327	PAPLN	CCTGGACACAGGAAAGACGGGCATTACAGGGACCAAAGCTCTGAAAGGTG	NM_173462.3		0.521434
ILMN_1707070	0.950052	0.289	PCOLCE	-1.08985	-5.26979	-0.259047	7262388	PCOLCE	GGACCTGCCAACTCCACCCACTGGTGCCTCCCTGAAGTTTTACGTGCCTT	NM_002593.2		0.539102
ILMN_1746888	0.718543	0.0411	PCOLCE2	2.18164	-3.79198	1.32641	16904386	PCOLCE2	CAGAGGAGCAGCTATCTGATTGGAAACCTGCCGACTTAGTGCGGTGATAG	NM_013363.2		1.38616
ILMN_2196328	0.788398	0.0645	POSTN	-1.95594	-4.15477	-0.752479	5453833	POSTN	TCAAATCGAAGAGTTGTGAACTGTTATCCCATTGAAAAGACCGAGCCTTG	NM_006475.1		1.19044
ILMN_1790761	0.891075	0.135	POSTN	-1.55575	-4.73107	-0.473101	5453833	POSTN	CAGGGAGACACACCCGTGAGGAAGTTGCAAGCCAACAAAAAAGTTCAAGG	NM_006475.1		0.869666
ILMN_2363658	0.884509	0.128	PXDN	-1.58695	-4.68959	-0.404178	109150415	PXDN	GTGCGGTCTGGGCCAGTCACAAGGAATTGTGTTGTCTAAGCCAAAGGGGG	NM_012293.1		0.89279
ILMN_1753005	0.950052	0.349	RELN	0.959298	-5.3912	0.193868	27436937	RELN	CTTACAATGTCCCCCTGGAGGCACGGATGAAAGGAGTCTTACTGCGCTGG	NM_005045.2		0.457175
ILMN_1800642	0.950052	0.37	RELN	-0.917596	-5.42704	-0.491237	27436939	RELN	GGCCCTGTAGCTCTGAATGCTATTTGTGTAACTGAAAGGTTGCACTCTAG	NM_173054.1		0.431798
ILMN_1682937	0.865805	0.109	RSPO1	1.67592	-4.56796	0.50307	89276770	RSPO1	TCTGGACTAGGTGCTAGGTTTCCAGGGAGGAGCCAAACACGGGCCTTGCT	NM_001038633.2		0.962574
ILMN_2081645	0.950052	0.344	RSPO2	0.968969	-5.38268	0.168965	40255217	RSPO2	TTTCCCATTTACTAAGTGGGGAGGGGGTCTCCTTATATAGTGCTTCATCG	NM_178565.3		0.463442
ILMN_1695108	0.95668	0.745	RSPO2	0.329571	-5.77005	0.0621335	40255217	RSPO2	GATGGAGAGGAACACTATGGAAACTTCCCAGGTGACTTTCAGAGCAGTTG	NM_178565.3		0.127844
ILMN_1681983	0.950052	0.588	RSPO3	0.551025	-5.67754	0.345501	73915101	RSPO3	GGTCACCTGGAACAGGTCTCCAATCTATGTTAGCACTATGTGGCTCAGCC	NM_032784.3		0.230623
ILMN_2347249	0.971729	0.847	RSPO4	0.195655	-5.80366	0.0704138	90970327	RSPO4	GCTCCCCGGAATCCTCAGAAACGGGATTTGTATTTGCCGTGACTGGTTGG	NM_001040007.1		0.0721166
ILMN_1750625	0.983327	0.901	RSPO4	0.126105	-5.81438	0.0231401	90970327	RSPO4	ATATTACATTCCCGACCCCAAGAGAGCACCCACCCTCAGACCTGCCCTCC	NM_001040007.1		0.0452752
ILMN_2196078	0.518678	0.0117	SLAMF6	-2.77332	-2.74379	-1.34211	38327616	SLAMF6	GGTGGAGGTTCCAGTGAGCCAAAATCATGCCAATGTATTCCAGTCTGGGT	NM_052931.3		1.93181
ILMN_1760109	0.950925	0.651	SLAMF6	-0.459287	-5.72139	-0.301137	38327616	SLAMF6	CTGGCCCACCTCCAGCCTCAGCTAGCATTACCCTTCTGACACTCTCTATG	NM_052931.3		0.186419
ILMN_1756959	0.950052	0.24	SLIT1	1.20998	-5.14614	0.214822	4507060	SLIT1	GCGGAGGAAGTTCACCTTTGAGTGCAGCGATGGGACCTCTTTTGCCGAGG	NM_003061.1		0.619789
ILMN_1676449	0.950052	0.525	SLIT2	0.64655	-5.62372	0.202632	4759145	SLIT2	CTGACGGCTCCTCCTTTGTGGACGAGGTTGAGAAAGTGGTGAAGTGCGGC	NM_004787.1		0.279841
ILMN_1811313	0.449453	0.00723	SLIT3	-2.98727	-2.33923	-1.15861	11321570	SLIT3	CCTCGTTTGTAGAAGAGGTGGAGAGACACTTAGAGTGCGGCTGCCTCGCG	NM_003062.1		2.14086
ILMN_2410938	0.877944	0.119	SMOC1	-1.62792	-4.63419	-0.458939	78190497	SMOC1	GAGGTTATCTCAGGAATGACTGGTGGCCCTGCCCCAACGTGGAAAGGTGG	NM_001034852.1		0.924453
ILMN_1791202	0.950052	0.256	SMOC1	-1.16871	-5.18987	-0.603273	78190497	SMOC1	CAACAGGGAAACTCTTCACCTCCCTGCAAACCTACCAGTGAGGCTCCCAG	NM_001034852.1		0.59176
ILMN_1719641	0.954172	0.676	SMOC2	0.424206	-5.7361	0.180029	24308276	SMOC2	AGGGCACCCAGTGTCTTAAGGAACCATTTGGAGGACAGTCTGAGAGCAGG	NM_022138.1		0.170053
ILMN_1796734	0.68954	0.0354	SPARC	-2.25537	-3.66843	-0.329928	48675809	SPARC	CGCAGCTCCCCAATCACACTAGCAACATTTCAAGTGCTTGAGAGCCATGC	NM_003118.2		1.451
ILMN_1795251	0.950052	0.589	SPARCL1	-0.548311	-5.67895	-0.200791	141803318	SPARCL1	ACTTGCTCCTCTGCGAGCATCTCTGGTGCCCATGGAACACTGCATAACCC	NM_004684.3		0.229885
ILMN_2218208	0.950052	0.606	SPARCL1	-0.524678	-5.69093	-0.1214	21359870	SPARCL1	CCAGCATCCTCCTCTGTTCTAACCACTTCAGAAATATATGCAGCTGTGAT	NM_004684.2		0.217527
ILMN_1791890	0.880604	0.122	SPON1	-1.615	-4.65179	-1.15348	110347422	SPON1	CAAGGACAAGCCACCCTAGTGTCTCATGTTTGTATTTGGTCCCAGTTGGG	NM_006108.2		0.91364
ILMN_1676099	0.950052	0.563	SPON2	-0.587888	-5.65775	-0.382065	6912681	SPON2	GACCATCTCTGCACTGAAGGGCCCTCTGGTGGCCGGCACGGGCATTGGGA	NM_012445.1		0.249492
ILMN_1651354	0.926188	0.189	SPP1	-1.36053	-4.9758	-0.445336	38146097	SPP1	GTCAGCTGGATGACCAGAGTGCTGAAACCCACAGCCACAAGCAGTCCAGA	NM_000582.2		0.723538
ILMN_2374449	0.950052	0.417	SPP1	-0.827803	-5.49924	-0.293497	91206461	SPP1	GGTCACTGATTTTCCCACGGACCTGCCAGCAACCGAAGTTTTCACTCCAG	NM_001040058.1		0.379864
ILMN_1709486	0.959163	0.769	SRPX	0.29772	-5.77959	0.14673	142375835	SRPX	CCGAAATGAGCCAGACCTGTAACACCTGACATGATGGTTCCTCTCTTGGC	NM_006307.3		0.114074
ILMN_1676213	0.912252	0.161	SRPX2	-1.45572	-4.85971	-0.577816	124517647	SRPX2	CCAGCGTCGGGAGCAAAGGGACATATGCGAGTGAACTTGAGCCAGGGCAT	NM_014467.2		0.793174
ILMN_3237755	0.989586	0.943	SSPO	-0.0728758	-5.81945	-0.0462495	134031944	SSPO	GATCATGGGACTCAGCAGCACTGACCACGTCCTTCCACGCTCTCTCACCT	NM_198455.2		0.0254883
ILMN_2112638	0.757924	0.0545	SVEP1	-2.04166	-4.01988	-0.94992	116256360	SVEP1	GCAGGATCATCTCTCCTCGGTAGTGCCTGGGCATCCTGGAACTTATGCAA	NM_153366.2		1.2636
ILMN_1744784	0.933677	0.197	TECTA	1.33568	-5.00506	0.390802	134268639	TECTA	GGCTGGACTGGTGTGAGGACAATGGAGGGTGTGAGCAGATTTGCACGAGC	NM_005422.2		0.705534
ILMN_1731213	0.950052	0.596	TECTB	0.538873	-5.68379	0.0939195	17158034	TECTB	TGCGACAGTGAGAAACTCTCCTGCCCAGTGACCTGCGATAAACGGAAGCG	NM_058222.1		0.224754
ILMN_1663866	0.673567	0.0325	TGFBI	-2.29684	-3.59793	-0.590371	4507466	TGFBI	CCAGCCTCATGGGAAGTCCTGGCACAGTTTTTGTAAAGCCCTTGCACAGC	NM_000358.1		1.48812
ILMN_1686116	0.925383	0.183	THBS1	1.3789	-4.95389	0.334951	40317625	THBS1	CAGTCTAATAAGCTGCTCTGCCCCTTGTGCTCAGAGTGGATGTTATGGGA	NM_003246.2		0.737549
ILMN_1678842	0.828127	0.0837	THBS2	-1.81959	-4.36148	-0.645047	40317627	THBS2	GACTGTCAACAGCGTGCAGGTTTTCTGTTTCTGTGTTGTGGGGTCAACCG	NM_003247.2		1.07727
ILMN_1804663	0.897605	0.142	THBS3	-1.52737	-4.76824	-0.285881	40317629	THBS3	CAAGGGGTATTACTCAGGCACTAACCCCAGGAAAGATGACAGCACATTGC	NM_007112.3		0.847712
ILMN_1736078	0.996621	0.981	THBS4	0.0237646	-5.82173	0.00488511	40549419	THBS4	TCTGGCGTCACCATAGACACCACAATGCGTGGAGGCCGACTTGGCGTTTT	NM_003248.3		0.00833099
ILMN_1726352	0.950052	0.256	THSD4	1.16879	-5.1898	0.346541	13376209	THSD4	CCCAGCACTCAGTTGTTTTGGATGTCTGTTCCTACTTGCCCTTACCCCCA	NM_024817.1		0.59176
ILMN_1810684	0.950052	0.499	TINAG	-0.688775	-5.59731	-0.271097	47271445	TINAG	GCAGTCAAACTCACTGGATGGGGCACACTGAGAGGAGCACAAGGGCAGAA	NM_014464.2		0.301899
ILMN_1807169	0.956262	0.735	TINAGL1	0.342538	-5.7659	0.06598	11545917	TINAGL1	CCTCTGGCGCCCCCACTCAAGACTACCAAAGCCAGGACACCTCAAGTCTC	NM_022164.1		0.133713
ILMN_2145670	0.851094	0.0979	TNC	-1.73554	-4.48374	-0.409009	4504548	TNC	ATGGGAGAGGGGTAGGATGTACAGGGGTAGTTTGTTTTAGAACCAGCCGT	NM_002160.1		1.00922
ILMN_1719759	0.959163	0.771	TNC	0.295353	-5.78026	0.145348	153946394	TNC	CCCTGGGGCCAACGGCAACAGCATGGGCCTCACCTCCTCTGTGATTTCTT	NM_002160.2		0.112946
ILMN_1785732	0.950052	0.357	TNFAIP6	-0.943395	-5.40504	-0.252158	26051242	TNFAIP6	CGATGATGTCCATGGCTTTGTGGGAAGATACTGTGGAGATGAGCTTCCAG	NM_007115.2		0.447332
ILMN_2123217	0.950052	0.549	TNFAIP6	0.610032	-5.64527	0.118024	26051242	TNFAIP6	AACGAGAAAATGAAACCTCTCATAATCCCACTGCATAGAAATAACAAGCG	NM_007115.2		0.260428
ILMN_1753789	0.937141	0.2	TNN	1.32584	-5.01651	0.760571	62988323	TNN	TCTGCAACTCCCATTCATGCCCACCAGGCCTCAGACTCCCTCTTTTCCCC	NM_022093.1		0.69897
ILMN_1806492	0.950052	0.37	TNR	0.916628	-5.42785	0.217184	4507630	TNR	GGATGTCGCAGGAATCCGCTGGCTAACATCTGCTCTTGGTTTCTGCTGCC	NM_003285.1		0.431798
ILMN_1708615	0.950052	0.563	TNXB	0.587703	-5.65785	0.356054	67782335	TNXB	TGAAGAGCCCCGCCTAGGAGTGCTGACCGTGACCGACACAACCCCAGACT	NM_019105.5		0.249492
ILMN_1684614	0.956211	0.731	TNXB	0.347959	-5.76412	0.193537	20665033	TNXB	GATAAAAATGGAGCACCCCATGGCGCCCCTCACTCAGATTCTCCCCTGGG	NM_032470.2		0.136083
ILMN_1801443	0.950052	0.409	TSKU	0.843761	-5.48691	0.163395	55928826	TSKU	CACAGGGCAGTGAGCTCTGTCTTCCCCCACCTGCCTAGCCCATCATCTAT	NM_015516.3		0.388277
ILMN_2111255	0.937141	0.201	VIT	1.32155	-5.0215	0.305085	21359973	VIT	CAGAGCAGGCAGAGCACCAGCAAGTGCTGCTTTACTAACTGACGTGTTGG	NM_053276.2		0.696804
ILMN_1709434	0.970008	0.836	VIT	-0.209519	-5.80097	-0.0975465	21359973	VIT	CACTCACCCCGCCAGAGACCACTCCTTCTTTGTGGACGAGTTTGACAACC	NM_053276.2		0.0777937
ILMN_1691127	0.99958	0.997	VTN	-0.00439725	-5.82199	-0.00150016	88853068	VTN	TGGGAGCCAACAACTATGATGACTACAGGATGGACTGGCTTGTGCCTGCC	NM_000638.3		0.00130484
ILMN_2289576	0.858726	0.105	VWA1	1.69945	-4.53498	0.968975	40068484	VWA1	GTTCCCCTTCGGCCAGCACAGCTCGGGTGAGGCTGCCCAGGATGCGGTGC	NM_022834.3		0.978811
ILMN_1781636	0.959937	0.774	VWA1	0.291089	-5.78145	0.118795	40068484	VWA1	CTGGGAATCAGAGGAATGGGGCAGAGCTGGGCATTCAGGACCTTGAGGAC	NM_022834.3		0.111259
ILMN_1716674	0.950925	0.643	VWA2	-0.47116	-5.71615	-0.201773	38348303	VWA2	CATGACGAGGATGGCAGCTCTTCCCAGCTACTGAGCACTTGCTTCCCAAG	NM_198496.1		0.191789
ILMN_3238344	0.953566	0.672	VWA3A	0.429935	-5.73378	0.116253	218505702	VWA3A	GCAGAGTCACAGTCAGCCCATCCTGGGGGAAGAAGAAACAAGTGAGCCTC	NM_173615.3		0.172631
ILMN_2094786	0.970225	0.838	VWA3B	0.207727	-5.80133	0.0362622	118918434	VWA3B	GACGCCCCACCCCCAGAAGTTTTAACCTGAAGGATGACTGTCACAGGACT	NM_144992.4		0.076756
ILMN_1764769	0.950052	0.356	VWA5A	-0.943772	-5.40471	-0.335515	47498550	VWA5A	GAAGGGTGGGCTTAATGGGAGCTTTGCCTGGGACCTGAACCTGGAGCACT	NM_014622.4		0.44855
ILMN_1682996	0.950052	0.559	VWA5A	-0.593578	-5.65458	-0.17988	47498549	VWA5A	TCTATGGATTTGGCTCTTCCTATGAGGCATGCTTTCCGGAGAGTGTGAAG	NM_198315.2		0.252588
ILMN_3236561	0.950052	0.307	VWA5B1	1.04897	-5.30929	0.826173	210147461	VWA5B1	GAGGGAAGATGCAGTGGAAGCCTGAGCCCTGTCTGGAGGTAGACCACGTG	NM_001039500.2		0.512862
ILMN_1760315	0.950052	0.31	VWCE	-1.04227	-5.31563	-0.543538	114431243	VWCE	TCGTTTCCACTGTCAGCATCCTCCCTGGACCGCGTGGCTGGCTCATCTTT	NM_152718.2		0.508638
ILMN_3240451	0.950052	0.291	VWDE	1.08426	-5.27527	0.220967	209571554	VWDE	TGGTCAAGGTAGAGAGCACCTAGGCTTAAATTTGGCACTGTCTTCCTGTC	NM_001135924.1		0.536107
ILMN_1752755	0.993209	0.962	VWF	-0.0481	-5.82089	-0.0113616	89191867	VWF	AGTGCTGCCAGTCCTCTGCATGTTCTGCTCTTGTGCCCTTCTGAGCCCAC	NM_000552.3		0.0168249
ILMN_1713499	0.883104	0.125	WISP1	1.59837	-4.67427	0.533707	18490998	WISP1	GGGCCTTTTCTGTGCCAGACATTGCTCTCAGTGCTTTGCATGTATTAGCT	NM_003882.2		0.90309
ILMN_1721067	0.97376	0.857	WISP1	0.182269	-5.80608	0.0417807	18490999	WISP1	GGGTCTTGGGGACTAACCCAATGCCTGTGAAGCAGTCAGCCCTTATGGCC	NM_080838.1		0.0670192
ILMN_1812461	0.950052	0.316	WISP2	1.02754	-5.32946	0.560167	18491001	WISP2	AAGGTGTCCAGGGTCCTCTAGCCCACTCCCTGCCTACACACACAGCCTAT	NM_003881.2		0.500313
ILMN_1755631	0.950925	0.636	WISP3	-0.480002	-5.71217	-0.127598	38202240	WISP3	GCTTTGTGTACCCGGAGCAATGAACAAGCGGCGACTTCTCTACCCCTCAG	NM_198239.1		0.196543
ILMN_1663780	0.955042	0.691	WISP3	-0.402893	-5.74448	-0.0763211	18491003	WISP3	TAGGGGCAGAGTGTGCTTGGAGTCAGAGAACAAGGACGCTGGTGTGGCTG	NM_130396.1		0.160522
ILMN_1712360	0.955042	0.709	WISP3	-0.37811	-5.75369	-0.203083	18491002	WISP3	GCTGTGGATTACATCTTGTGTGTGTCAGAGAAACTGCAGAGAACCTGGAG	NM_003880.2		0.149354
ILMN_1654473	0.950052	0.595	ZP1	0.540161	-5.68314	0.0992458	66348147	ZP1	ACGATCCTCAGGTCACCGTAATGACACTGCCAGGCCCCAGGACATCGTGA	NM_207341.2		0.225483
ILMN_1674519	0.926188	0.189	ZP2	1.3602	-4.97619	0.59338	4508044	ZP2	TGCTGTGGCTGCCTTTGCAGGTGTGGTGGCAACTCTAGGCTTCATCTACT	NM_003460.1		0.723538
ILMN_1672378	0.959163	0.77	ZP3	0.29658	-5.77991	0.0632536	38327648	ZP3	TGCGTCTGATGGAGGAGAACTGGAACGCTGAGAAGAGGTCCCCCACCTTC	NM_007155.4		0.113509
ILMN_1779031	0.9777	0.875	ZPLD1	-0.159258	-5.80984	-0.0274557	28372568	ZPLD1	GGAACGGCTGCTGTTTCAGCTGTTGGCCTTTTCAATTCTATACTCCATTT	NM_175056.1		0.0579919
ILMN_1672776	0.92893	0.193	COL10A1	-1.34714	-4.99162	-0.256185	98985802	COL10A1	CCCCTAAAATATTTCTGATGGTGCACTACTCTGAGGCCTGTATGGCCCCT	NM_000493.3		0.714443
ILMN_2286253	0.950052	0.456	COL11A1	0.759739	-5.54936	0.140853	98985809	COL11A1	GGACAGTGGCTACTAAATCAAAGGAAAAATCCAAAAAGTTTACACCCCCC	NM_080629.2		0.341035
ILMN_1789507	0.971729	0.849	COL11A1	0.193276	-5.8041	0.0314364	98985805	COL11A1	GGTGCCACCAACCCATTTTGTGCCACATGCAAGTTTTGAATAAGGATGGT	NM_001854.3		0.0710923
ILMN_1731446	0.993306	0.963	COL11A1	-0.0472241	-5.82093	-0.00950334	18375517	COL11A1	AGTATGGGGAAGCAGAGTATAAAGAGGCTGAAAGTGTAACAGAGGGACCC	NM_001854.2		0.0163737
ILMN_2392803	0.993502	0.966	COL11A1	0.0433398	-5.8211	0.0158434	98985809	COL11A1	TCTGGAAGACTTTTGGAAGCACACTCTGATCAACTCTTCTCTGCCGACAG	NM_080629.2		0.0150229
ILMN_1748166	0.950052	0.501	COL11A2	0.685784	-5.59923	0.131003	111118969	COL11A2	CACCTATGGCTATGGGGATGATTATCGTGAGGAGACAGAGCTTGGCCCTG	NM_080680.2		0.300162
ILMN_1721178	0.986216	0.92	COL11A2	0.101984	-5.81701	0.0208528	18201918	COL11A2	ACTGAGTATGTTCATTGCCACCCCTGTCCTCCCCTGGGCACCCCTCACTT	NM_080681.1		0.0362122
ILMN_2311456	0.99214	0.958	COL11A2	-0.0535343	-5.82063	-0.0109605	111118971	COL11A2	ACTGCCTGCTACTTGAGGGCCAGGATGCTCCCCCAGGGAAGAAACGGAAT	NM_080681.2		0.0186345
ILMN_1733756	0.950052	0.434	COL12A1	-0.799025	-5.52092	-0.329246	93141048	COL12A1	GAGAGAACATGCCGTGTGCCTTTAGTTAGCACAGCGGGCAGCCTCAGTGA	NM_080645.2		0.36251
ILMN_1741695	0.950052	0.588	COL12A1	0.55097	-5.67757	0.0920265	93141046	COL12A1	CACCCTACGGGGGATGACAGAAGACTGGGGGAGTTAGTGGTTGGACCCTA	NM_004370.5		0.230623
ILMN_2370624	0.885937	0.129	COL13A1	-1.58189	-4.69637	-0.785862	22027588	COL13A1	AAATTATTGTGTCCTGGTGCCAAAGGGGGCCAGCCAGAACTGAGGTGCTG	NM_080805.2		0.88941
ILMN_2311052	0.950052	0.466	COL13A1	-0.742822	-5.56119	-0.193144	22027608	COL13A1	TTAATAAATTATTGTGTCCTGGTGCCAAAGGGGGCCAGCCAGAACTGAGG	NM_080815.2		0.331614
ILMN_1786598	0.958563	0.764	COL14A1	-0.303724	-5.77786	-0.0454388	55743095	COL14A1	CTACTTTTGGGGGGCAGGGCTCATTTCAGCAGCCTAAATCTCCTCCTTGG	NM_021110.1		0.116907
ILMN_1768940	0.950052	0.549	COL15A1	-0.609885	-5.64535	-0.230632	116008151	COL15A1	CTGCAGGAAACCCCAGCAGTGTGAACGCATCCCAACATAGGTTAAGAGCA	NM_001855.3		0.260428
ILMN_1684554	0.360591	0.00389	COL16A1	-3.25923	-1.81199	-1.07073	100913219	COL16A1	CCATGCCGATGGAGCAGCAGTACCCACCCATGAAAACCATGAAGGGGCCT	NM_001856.3		2.41005
ILMN_1799105	0.950052	0.336	COL17A1	0.984671	-5.36869	0.188436	119829186	COL17A1	GCGCCTTCCTGGAGGTGACACTTGATGGGGGTGTGTTCTGGTTACTGTTC	NM_000494.3		0.473661
ILMN_1651282	0.950052	0.522	COL17A1	-0.652065	-5.62036	-0.210555	119829186	COL17A1	GCTGGGGACACAGCATCAGCTCAAGACGTCACCCTCCATTCTGCACTCAG	NM_000494.3		0.282329
ILMN_1806733	0.33868	0.00317	COL18A1	-3.3483	-1.63693	-0.527131	110611232	COL18A1	AGTCATTCGTTCTGTGGAGGGACAAGTGGACTCAGGGCAGCGCCAGGCTG	NM_130445.2		2.49894
ILMN_1701937	0.95755	0.753	COL18A1	-0.319597	-5.77314	-0.188986	110611232	COL18A1	GAGGCAGCATCCCGCGGCGCTGACGGTCCTGGGGAGAGCATGGCGCCGAG	NM_130445.2		0.123205
ILMN_1795843	0.950052	0.374	COL19A1	0.90992	-5.43348	0.357078	61698136	COL19A1	GCGTGTTCAGATCCAATAGTGAGTGATGTGGTACAACTGGAGGAGTTAGC	NM_001858.4		0.427128
ILMN_2116605	0.989356	0.942	COL19A1	0.0738127	-5.81939	0.0131127	61698136	COL19A1	CAAAATCCCACATGGGCATAATGCTTTGAGGCCTTGATTCCTACATGTTC	NM_001858.4		0.0259491
ILMN_1701308	0.543281	0.0136	COL1A1	-2.70303	-2.87424	-0.853112	110349771	COL1A1	TCCCTCCTAGTCTGTCCTGCGTCCTCTGTCCCCGGGTTTCAGAGACAACT	NM_000088.3		1.86646
ILMN_2104356	0.918673	0.168	COL1A2	-1.42841	-4.89366	-0.433575	48762933	COL1A2	GATCCACATTGTTAGGTGCTGACCTAGACAGAGATGAACTGAGGTCCTTG	NM_000089.3		0.774691
ILMN_1785272	0.957964	0.76	COL1A2	-0.309294	-5.77623	-0.0903797	48762933	COL1A2	GCGAAACCTGTATCCGGGCCCAACCTGAAAACATCCCAGCCAAGAACTGG	NM_000089.3		0.119186
ILMN_1753182	0.985534	0.912	COL20A1	0.111319	-5.81606	0.0235049	112734844	COL20A1	CTTCCTCCCTGGGTTTGTCTGGACACCGAGAGCGACCACATCCTGGAGAA	NM_020882.2		0.0400052
ILMN_1784532	0.950052	0.249	COL22A1	-1.18757	-5.17005	-0.702164	40805822	COL22A1	GCCAGGGCACTGACCAGAGCTGGGAAATTTGTATCTCCAAGGCGGCTCTG	NM_152888.1		0.603801
ILMN_1666665	0.950052	0.335	COL23A1	0.987321	-5.36631	0.171716	29725623	COL23A1	GGATGGAGGGGCCCAGCCTGGACTGACTGTACTTCCTGTCTCTGTTTCCA	NM_173465.2		0.474955
ILMN_1810996	0.967879	0.82	COL24A1	0.230664	-5.79652	0.121264	32964828	COL24A1	GCCGGTGATACACTACCTCTTACGTGTTGCCTCTTTGTGTTGCTTGGTGC	NM_152890.4		0.0861861
ILMN_1666523	0.950052	0.38	COL25A1	0.897935	-5.44343	0.15792	38570074	COL25A1	TGGATGGGCTGGATGCCCCTTGCCAATTGGGGCCAGATGGCTTACCCATG	NM_198721.1		0.420216
ILMN_1791112	0.970749	0.843	COL25A1	0.201072	-5.80263	0.0657821	38570072	COL25A1	ACCTCTCCATCCCAGCATGTACCTTGTTTGATTCTTCTCCTGCTGTCTGC	NM_032518.2		0.0741724
ILMN_2399933	0.977166	0.872	COL25A1	0.162886	-5.80928	0.0383839	38570074	COL25A1	GGAGAAAGAGGTGAAAAAGGAGCTATGGGAGAGCCTGGACCAAGAGGGCC	NM_198721.1		0.0594835
ILMN_1788377	0.950052	0.542	COL27A1	0.620338	-5.63931	0.365478	32140759	COL27A1	GCTCCGAGGTGACCCAGCACATCACCATCCACTGCCTTAACATGACCGTG	NM_032888.2		0.266001
ILMN_3240788	0.950052	0.4	COL28A1	-0.860126	-5.47404	-0.350766	154759254	COL28A1	CAGGTCAACTCTTGTGCCCGATTTTGGTTCAGTGGCTGTAATGGCTCAGG	NM_001037763.2		0.39794
ILMN_1742840	0.950052	0.581	COL2A1	0.56122	-5.67219	0.0961338	111118975	COL2A1	AGGAGGCTGGCAGCTGTGTGCAGGATGGGCAGAGGTATAATGATAAGGAT	NM_001844.4		0.235824
ILMN_1674785	0.996621	0.981	COL2A1	-0.0242112	-5.82172	-0.00805856	15149477	COL2A1	GACCTGATGTCCATTCATCCCACCCTCTCACAGTTCGGACTTTTCTCCCC	NM_001844.3		0.00833099
ILMN_1773079	0.135993	0.000332	COL3A1	-4.31393	0.29061	-1.40015	110224482	COL3A1	TCAACTGCTTGTAAAGGTGCTCCTCTTTTTTCTTGTCATTGCTGGTCAAG	NM_000090.3		3.47886
ILMN_1653028	0.948942	0.219	COL4A1	-1.26872	-5.08167	-0.357328	148536824	COL4A1	CATCGCATGGACCGCAGGAGGGCAGATTCGGACCACTAGGCCTGAAATGA	NM_001845.4		0.659556
ILMN_1724994	0.920218	0.174	COL4A2	-1.40962	-4.91673	-0.351448	116256353	COL4A2	TTCAACTCCCTTCTCGGGGTGGGACAGACGAGACAACAGCACACAGGCAG	NM_001846.2		0.759451
ILMN_1662731	0.950052	0.435	COL4A3	0.796967	-5.52244	0.353622	89142734	COL4A3	CCACTGGCCTCCACTCAGGCCTCCATCTTCTCATGCCCTCTTACCAGTAT	NM_031365.2		0.361511
ILMN_2272270	0.967879	0.819	COL4A3	0.231271	-5.79638	0.13904	89142729	COL4A3	TTCACAAGTGCAGGTTCTGAGGGCACCGGGCAAGCACTGGCCTCCCCTGG	NM_000091.3		0.0867161
ILMN_1778308	0.471178	0.00854	COL4A4	-2.91351	-2.47987	-0.578802	116256355	COL4A4	CCTGTTCATCTTGAACTTGGCCTGAGAACATTTTCTGGGAAGAGGTAAGG	NM_000092.4		2.06854
ILMN_2375360	0.950052	0.271	COL4A5	1.13207	-5.22762	0.557763	15890085	COL4A5	AGCTCCAGCTGTGGTGATCGCAGTTCACAGTCAGACGATCCAGATTCCCC	NM_033380.1		0.567031
ILMN_1742534	0.950052	0.365	COL4A5	-0.92769	-5.4185	-0.432516	15890084	COL4A5	AGAATCCTCCTGTGGCCTCTGCTTGTACAGAACTGGGAAACAACACTTGG	NM_000495.3		0.437707
ILMN_1813021	0.94297	0.211	COL4A6	-1.29211	-5.05527	-0.651614	16357500	COL4A6	GTCGGTGCTCCCTGGGCTGCTGGTCTTCTTTACCTTCCAGCTGCTCACAG	NM_001847.1		0.675718
ILMN_1675857	0.950052	0.445	COL4A6	-0.779296	-5.53537	-0.451221	148536822	COL4A6	CAGATGTGTGCAATGTGGCAAACTGAAGCTGCACAGTGTTGGTTTCCTTG	NM_001847.2		0.35164
ILMN_1811289	0.950052	0.505	COL4A6	0.678175	-5.60409	0.312305	16357502	COL4A6	GAGTAAGGAAACAGCCTCCAAGCATCAGCAGAGCCCAGATGAGCACGGGC	NM_033641.1		0.296709
ILMN_1706505	0.371242	0.0042	COL5A1	-3.226	-1.87705	-0.908044	89276750	COL5A1	GTTCCAAGGTAAGCCTCGTAAAGGTCATCCCACCATCACCAAAGCCTCCG	NM_000093.3		2.37675
ILMN_1729117	0.950052	0.402	COL5A2	-0.855901	-5.47738	-0.41397	89363016	COL5A2	GAGCATCGTTCCAATGCTTGTTCACTGTTCCTCTGTCATACTGTATCTGG	NM_000393.3		0.395774
ILMN_1796288	0.950052	0.508	COL5A3	-0.673704	-5.60691	-0.282497	110735434	COL5A3	GGGACTTCCCTTGACTGGGTTGTGTTTCTTTTCCTGCCTCAGCCCAGCTC	NM_015719.3		0.294136
ILMN_1732151	0.980477	0.889	COL6A1	-0.140879	-5.81249	-0.0228476	87196338	COL6A1	CGCAGGGGCGCTGGCTGCACTCAAGACCCTCGAGATTAACGGTGCTAACC	NM_001848.2		0.0510982
ILMN_1765017	0.950052	0.296	COL6A2	1.07313	-5.28611	0.441789	115527069	COL6A2	TTTCCTCTACCGACTCGCCAGCCCAAATGCCGCTCTTCACTCTGGCCTCG	NM_058175.2		0.528708
ILMN_1783909	0.950052	0.404	COL6A2	0.852521	-5.48005	0.412534	115527061	COL6A2	TGTTCCACGAGAAGGACTATGACAGCCTGGCGCAACCCGGCTTCTTCGAC	NM_001849.3		0.393619
ILMN_1809928	0.980477	0.889	COL6A2	-0.141855	-5.81236	-0.0770916	115527061	COL6A2	CTCTGCCCGGACCCTCAGATCGTGTGCCCAGACCTTCCCTGCCAAACAGA	NM_001849.3		0.0510982
ILMN_2307861	0.5105	0.011	COL6A3	-2.79816	-2.69737	-1.0341	55743097	COL6A3	CCTATCAATCCAAATTCCCTCTGGAGTTTCATGTTATGCCTGTTGCAGGC	NM_004369.2		1.95861
ILMN_1706643	0.876479	0.116	COL6A3	-1.64256	-4.61414	-0.515455	55743101	COL6A3	GCCTGTGTATCGTGGAGAAACAAGAGACCAACTTTTTCATTCCCTGCCCC	NM_057165.2		0.935542
ILMN_3237932	0.950052	0.586	COL6A6	-0.553564	-5.67622	-0.152948	156616289	COL6A6	CACCCAATGTTCAGACCTTACCTCAGTCTAAGAGCTGGCTCCACAGTTGG	NM_001102608.1		0.232102
ILMN_1751161	0.477205	0.00875	COL7A1	-2.90222	-2.5013	-1.18072	17738300	COL7A1	TGCACGTCCGTTATTTCAGTGACTTGGTCCCGTGGGTCTAGCCTTCCCCC	NM_000094.2		2.05799
ILMN_1685433	0.410396	0.00551	COL8A1	-3.10758	-2.10753	-1.14659	32895367	COL8A1	GAGACCGGGTGTTCCTCCAGATGCCCTCAGAACAGGCTGCAGGACTGTAT	NM_020351.2		2.25885
ILMN_2402392	0.69312	0.036	COL8A1	-2.24716	-3.6823	-0.767637	32895367	COL8A1	CCGTGATGTACACGTACGACGAGTACAAAAAGGGCTTCCTGGACCAGGCA	NM_020351.2		1.4437
ILMN_2246563	0.93684	0.199	COL8A1	-1.32828	-5.01368	-0.352863	32895369	COL8A1	GGAGCTCACACGTTCACCAACTCACCCTTGAAGTCATCTCAAGAACAAAA	NM_001850.3		0.701147
ILMN_2102330	0.950052	0.35	COL8A2	0.956702	-5.39347	0.168735	32964829	COL8A2	AGCTTCTGCCAAATTTCATTCCTCAAACCTTTCAGGAGGGGTGGTTGGCG	NM_005202.1		0.455932
ILMN_1674050	0.950052	0.473	COL8A2	0.731424	-5.56902	0.173941	32964829	COL8A2	GGACTCTCAAACCATACCTGGTGGGGGTTCTTCGCTCAACCTCTTCTTCC	NM_005202.1		0.325139
ILMN_1814701	0.879472	0.12	COL9A1	-1.62301	-4.6409	-0.529324	73486665	COL9A1	TCTCATCGATGTGCTGTCTCTGGAGTGATAAGAAAGGGCTACATCTCCCG	NM_001851.3		0.920819
ILMN_2390099	0.924455	0.179	COL9A1	1.39062	-4.93979	0.240893	73486665	COL9A1	CTAAAGGTGACTTGGGAGAAAAGGGGGAGCGTGGCCCTCCAGGAAGAGGT	NM_001851.3		0.747147
ILMN_1665374	0.950052	0.557	COL9A1	0.597162	-5.65258	0.118581	73486663	COL9A1	CCACCTATGCTAGTGGCGGGTCTGGAAGCCTAGAGGGGAACCAGGCTGCA	NM_078485.2		0.254145
ILMN_2284647	0.955042	0.703	COL9A1	0.386503	-5.75064	0.0665365	73486665	COL9A1	GAGAAACTTGCCATGAGCTGCCAGCCAGAATAACGCCCAGCCAGACCACC	NM_001851.3		0.153045
ILMN_1685122	0.976374	0.87	COL9A2	-0.165687	-5.80884	-0.109971	31083125	COL9A2	GCCAGTTCCTGATCCCATCTCACTCTCTGGACCTACCAGGTGACTGCTGC	NM_001852.3		0.0604807
ILMN_1740155	0.950925	0.647	COL9A3	-0.464637	-5.71905	-0.12798	119508425	COL9A3	AGAGGAAACCAGGGTGACAGAGGAGACAAAGGCGCGGCAGGAGCAGGGCT	NM_001853.3		0.189096
ILMN_1693148	0.881071	0.122	ACAN	1.61336	-4.654	0.579267	126090891	ACAN	CCCCCGCCAGGTCCTGTGCAGAGGAGCCCTGTGGAGCTGGGACCTGCAAG	NM_013227.2		0.91364
ILMN_2168166	0.845054	0.0937	ASPN	-1.75894	-4.45012	-0.443875	41350213	ASPN	GGACTGGATAACTCTGAGAAACACATCTAGTATAACTGAATAAGCAGAGC	NM_017680.3		1.02826
ILMN_1732154	0.950052	0.559	BCAN	0.594704	-5.65396	0.109045	38372934	BCAN	CTTCCATCAGGGCCGGAGTAAATCCCTAAGTGCCTCAACTGCCCTCTCCC	NM_021948.3		0.252588
ILMN_1680300	0.95493	0.685	BCAN	0.411213	-5.74126	0.0718911	38372934	BCAN	TGGTTGAGGCAAGAGAGGTGGGGGAGGCAACTGGTGGTCCTGAGCTATCT	NM_021948.3		0.164309
ILMN_2246131	0.971729	0.847	BCAN	-0.195853	-5.80362	-0.0763235	38372930	BCAN	CCGGAGTCCAGGAGAACCCGTACCCCCACAGAGCCTTAAGCAACTACTTC	NM_198427.1		0.0721166
ILMN_2206746	0.831261	0.0872	BGN	-1.79756	-4.39391	-0.315426	34304351	BGN	TCCAGCGCAAGGAGGGGCTGCTTCTGAGGTCGGTGGCTGTCTTTCCATTA	NM_001711.3		1.05948
ILMN_1700652	0.950052	0.375	CHAD	0.90747	-5.43552	0.445069	153251228	CHAD	GTTTTAAAGCCCATGCCCCAACTCTGCCAGCCCCCACCTGCCAGGACGTT	NM_001267.2		0.425969
ILMN_3238072	0.968321	0.824	CHADL	0.225893	-5.79756	0.0940975	194440718	CHADL	AGGCCCAGTGCCAGGAGAACCCCCATCAAAGGAAGACAGTGTGGAGCAGA	NM_138481.1		0.0840728
ILMN_1768227	0.950052	0.545	DCN	-0.61513	-5.64233	-0.136148	47419926	DCN	GCTTTGGGAGCAGAGAAGAGGGAGAAAGCAGCATCTTGCCTGGATGAGCC	NM_133503.2		0.263603
ILMN_1683194	0.950925	0.638	DCN	0.478273	-5.71295	0.132655	47419925	DCN	TCAACCTAGTCACAGAGCAGCACCTACCCCCTCCTCCTTTCCACACCTGC	NM_001920.3		0.195179
ILMN_2347145	0.986156	0.919	DCN	0.103322	-5.81688	0.0155372	47419923	DCN	CAGCCATCCACCTTCAGATGTGTCTACGTGCGCTCTGCCATTCAACTCGG	NM_133505.2		0.0366845
ILMN_1677567	0.950052	0.467	EPYC	0.742037	-5.56174	0.133183	68800359	EPYC	CCACATCCCTCTGCCACTCCCAGAAAATCTACGAGCCCTTCACCTCCAGA	NM_004950.3		0.330683
ILMN_2212878	0.955042	0.703	ESM1	0.386888	-5.75049	0.122975	88758588	ESM1	CTGCTGATGTAGTTCCCGGGTTACCTGTATCTGAAGGACGGTTCTGGGGC	NM_007036.3		0.153045
ILMN_1773262	0.991441	0.953	ESM1	0.0602046	-5.82026	0.0311247	13259505	ESM1	GGCCAACAGAGTTGTGAATGTGTGTGGAAGGCCTTTGAATGTAAAGCTGC	NM_007036.2		0.0209071
ILMN_1789639	0.857539	0.104	FMOD	-1.70264	-4.53049	-0.762929	71040110	FMOD	GGGGCAAGGACTGTTGGAGGAGAGTTAGCCCAAGTATAGGCTCTGCCCAG	NM_002023.3		0.982967
ILMN_2210519	0.950052	0.504	HAPLN1	0.679701	-5.60312	0.129704	40254458	HAPLN1	AGCTCTATGTAAGGAGACTTAGAGCCAAACTGTTTAAGCTGTATCATCCC	NM_001884.2		0.297569
ILMN_1678812	0.95755	0.752	HAPLN1	-0.320584	-5.77284	-0.0881105	40254458	HAPLN1	AAATTCTCGGATATGACCGCTGTGATGCGGGCTGGTTGGCGGATGGCAGC	NM_001884.2		0.123782
ILMN_1678788	0.950052	0.26	HAPLN2	1.15816	-5.20085	0.200513	46852179	HAPLN2	AAGAAGCTTGGGAGTCGTGGCGGGGGTCTCTCGCCACCCCTTTCCGGAGA	NM_021817.2		0.585027
ILMN_1654319	0.965102	0.803	HAPLN3	-0.252725	-5.79142	-0.113608	32455240	HAPLN3	TCCGGAGCTGGGCTTTGGGCCTCTCCTGCCCACCTCTACTTCTCTGTGAA	NM_178232.2		0.0952845
ILMN_2165463	0.956072	0.724	HAPLN4	0.35775	-5.76082	0.0684443	30794471	HAPLN4	GTCCCCCTGGGGCCCTCTTTACTGTCACGTCATCTCTAGGAAACCTATCT	NM_023002.1		0.140261
ILMN_1787548	0.886496	0.132	HSPG2	-1.56999	-4.71221	-0.93142	140972288	HSPG2	TCCCTGGCTTCTCTGGCCCACGCTGCCAACAAGGCTCTGGACATGGCATA	NM_005529.5		0.879426
ILMN_2226973	0.950052	0.457	IMPG1	0.758516	-5.55022	0.139445	6631089	IMPG1	CGCAGGGAGATGCAGGTCTCTCTAAACGCATGAATGTATGTAGTGTGTAG	NM_001563.2		0.340084
ILMN_1722369	0.955042	0.692	IMPG1	0.40221	-5.74474	0.0751156	6631089	IMPG1	GGTCCTCCAGGGAAAGGGAGCTCCATGCAGGTTGCCAGATCACTCTGAAA	NM_001563.2		0.159894
ILMN_1679690	0.959488	0.772	IMPG2	-0.293781	-5.7807	-0.0575654	57242792	IMPG2	GCTTCTGAATCACTGGGGGTGTCTCCTAAGAACTGTGCCTCGGGTTTTTC	NM_016247.2		0.112383
ILMN_2151304	0.950052	0.346	KERA	0.964848	-5.38632	0.156618	62865891	KERA	GCTGTTGGTGGTACAAGTTTGATATTTAGCTTGAGAATGGGTATGGAATG	NM_007035.3		0.460924
ILMN_1732678	0.950052	0.411	KERA	0.839708	-5.49006	0.153861	62865891	KERA	GGACACAAGTCATATTCCCCATTGCTCTCGGCCACCATTTTCATTTGTGC	NM_007035.3		0.386158
ILMN_2167805	0.342738	0.00338	LUM	-3.32079	-1.69109	-0.896443	61742794	LUM	CTGTCAAATGATGTGCAAAACCTTTTACTGGTTGCATGGAAATCAGCCAA	NM_002345.3		2.47108
ILMN_1790529	0.925383	0.186	LUM	-1.36767	-4.96731	-0.329781	61742794	LUM	GCGTTTGGATGGCAATCGCATCTCAGAAACCAGTCTTCCACCGGATATGT	NM_002345.3		0.730487
ILMN_1683211	0.950052	0.441	NCAN	0.78519	-5.53109	0.14351	118600982	NCAN	TTTTTGGGGGGTCTTGGTTTATGCTCCCTGCCCTTGAGCCCCTCAGCCGT	NM_004386.2		0.355561
ILMN_1782274	0.969892	0.834	NYX	0.211776	-5.80052	0.0815923	12007645	NYX	AAGACAAAGGGTGGCGGTGGTTCCTGGGGTCTGAGATGTGTTAGGAGGCG	NM_022567.1		0.0788339
ILMN_1790098	0.950925	0.641	OGN	-0.473819	-5.71496	-0.15728	126273526	OGN	GGTGCCAGAGTAAAGTTTCTAAAATAACATTCCTCTCACTTGTACCCCAC	NM_014057.3		0.193142
ILMN_1688838	0.952793	0.665	OGN	0.43879	-5.73013	0.0834484	126273524	OGN	AACTTAAAATTATCAATCTTTCTTGAATTTCTGATAGAGAAGTAAAACTA	NM_033014.2		0.177178
ILMN_2387105	0.980477	0.889	OGN	0.141671	-5.81238	0.0911247	126273526	OGN	AATGACACCAGTTACATCCGGGACCGCATTGAAGAGATACGCCTGGAGGG	NM_014057.3		0.0510982
ILMN_1749846	0.950052	0.295	OMD	1.07501	-5.28429	0.353342	4826875	OMD	GATCTCACCATTATGACATCCATCCCCCTAGCTCACCACATAGCACATAG	NM_005014.1		0.530178
ILMN_1781459	0.956072	0.729	OPTC	0.351844	-5.76282	0.0622997	57863308	OPTC	CGCCTGGATGGCAACCCCATCAACCTCAGCCTCTTCCCCAGCGCCTACTT	NM_014359.3		0.137272
ILMN_1770800	0.950052	0.568	PODN	0.580064	-5.66205	0.192453	45505136	PODN	GACCCAGCTGCACCTAGGAGACACCTTTGTTCTTCAGGCCTGTGGGGGAA	NM_153703.3		0.245652
ILMN_1803220	0.950052	0.554	PODNL1	0.602059	-5.64981	0.117597	40254970	PODNL1	CCTGCCCTGCCACGTCCCAAACATTCTAGTTAGCTGGTAAAGCAATCAGA	NM_024825.2		0.25649
ILMN_1707380	0.95471	0.681	PRELP	-0.416431	-5.73921	-0.19591	41349452	PRELP	GGGAAGGTTGGTTGCAAAAGTGGGATTCATGACCCTCCCAGGCTACACCA	NM_002725.3		0.166853
ILMN_2395156	0.956677	0.743	PRELP	-0.332292	-5.7692	-0.156908	41349453	PRELP	GACGCCCTCGCTGCTCCTACCTGGCTACTAAACATCGACTTCGGTTCACT	NM_201348.1		0.129011
ILMN_1729314	0.973309	0.854	PRG2	-0.186145	-5.8054	-0.0515513	46276888	PRG2	CAGGATCACAGGCTCGGGTCGCTGCAGACGCTTTCAGTGGGTTGACGGCA	NM_002728.4		0.0685421
ILMN_1659645	0.95755	0.752	PRG3	0.319691	-5.77311	0.0591513	10092602	PRG3	GGCCCTATGCACCAAAGGAGGTTATTGGCGACGAGCTCAATGCGACAAGC	NM_006093.2		0.123782
ILMN_3304072	0.950052	0.34	PRG4	-0.977043	-5.37551	-0.229412	189181721	PRG4	CCACCATCTCCAGCTCGCAGAATTACTGAAGTTTGGGGTATTCCTTCCCC	NM_001127709.1		0.468521
ILMN_3221432	0.955042	0.691	PRG4	0.403712	-5.74417	0.176645	189163478	PRG4	GTAGATGGACTGACTACTTTGCGCAATGGGACATTAGTTGCATTCCGAGG	NM_005807.3		0.160522
ILMN_1746013	0.548497	0.0141	SPOCK1	2.68599	-2.90567	0.94877	82659117	SPOCK1	GTCTGTCCAGGTCTGTCCCCCTGCTCATCCCAGGATGCCACTCACATTTT	NM_004598.3		1.85078
ILMN_1656287	0.743129	0.0485	SPOCK2	2.10011	-3.92582	0.631503	7662035	SPOCK2	GCCTCCACTTGGGGACCCTGCCTCGTGTCGTCTTTATCTGCCTATTACTC	NM_014767.1		1.31426
ILMN_2342559	0.927123	0.191	SPOCK3	1.35237	-4.98546	0.309725	93141000	SPOCK3	GCATCTTGCTAGACCTAGTTGAGTCAGGATAACAGAGAGATACCACATGG	NM_016950.2		0.718967
ILMN_2169152	0.461647	0.00783	SRGN	2.95204	-2.40656	1.00665	45935370	SRGN	GTACCAATGGGTGCGCTGCAATCCAGACAGTAATTCTGCAAACTGCCTTG	NM_002727.2		2.10624
ILMN_1760347	0.66949	0.032	SRGN	2.30403	-3.58564	0.462875	45935370	SRGN	CCTTAGGTCTCTTGACAGGAATCTGCCCTCAGACAGCCAGGACTTGGGTC	NM_002727.2		1.49485
ILMN_1687301	0.471178	0.00849	VCAN	-2.91604	-2.47506	-1.84703	21361115	VCAN	CAGCCATAGGTGCAGTTTGCTTCTACATGATGCTAAAGGCTGCGAATGGG	NM_004385.2		2.07109
ILMN_2184184	0.950925	0.646	ANXA1	-0.466307	-5.71831	-0.164113	4502100	ANXA1	CCTGGTGGCTCTTTGTGGAGGAAACTAAACATTCCCTTGATGGTCTCAAG	NM_000700.1		0.189767
ILMN_1699421	0.950052	0.253	ANXA10	-1.17613	-5.18211	-0.213804	48762936	ANXA10	ACTGCTTGCCATCTGTGCTGGTGATGCTGAGGACTACTAAAATGAAGAGG	NM_007193.3		0.596879
ILMN_1685170	0.950052	0.332	ANXA11	0.994986	-5.35939	0.163032	22165429	ANXA11	GGTAGCCTGTGCATCTGGTGAGTGTGTCACGAGCTTTGTTACTGCCAAAC	NM_001157.2		0.478862
ILMN_2380494	0.950052	0.605	ANXA11	0.524959	-5.69079	0.13096	22165429	ANXA11	GCCAAAACTTGTTTCCACATTAAGAGTCAGCCAGCTCTGGAATGGTCTGG	NM_001157.2		0.218245
ILMN_1807003	0.967879	0.819	ANXA11	0.231548	-5.79632	0.120335	22165432	ANXA11	TCACAGTTCTGGAGGCTGAGAAGATCGTGAGGCTGCATCTGGCAAGGGCC	NM_145869.1		0.0867161
ILMN_1799243	0.886496	0.13	ANXA13	1.5786	-4.70076	0.704817	51895794	ANXA13	GAGTCCCGGATTACTTTCTTGGCAGCTTAAGTGGCGCAGCCAGGCCAAGC	NM_004306.2		0.886057
ILMN_2412490	0.964189	0.794	ANXA13	-0.264432	-5.78853	-0.0966928	51895794	ANXA13	CAGGGCAATAGGAACACAGGGTGGAACCGCCTTTGTCAAGAGCACATTCC	NM_004306.2		0.100179
ILMN_1737612	0.984871	0.909	ANXA13	0.115267	-5.81563	0.0401373	51896028	ANXA13	TCGACAGTCGTGCAGCCTCTCAGCCACCCATCACGGAATGGAGAGCCAGA	NM_001003954.1		0.0414361
ILMN_2409167	0.950052	0.236	ANXA2	1.2218	-5.13337	0.430787	50845387	ANXA2	TGTGGTGGAGATGACTGAAGCCCGACACGGCCTGAGCGTCCAGAAATGGT	NM_001002858.1		0.627088
ILMN_1755937	0.950052	0.307	ANXA2	-1.04824	-5.30998	-0.308462	50845385	ANXA2	CGTGCTTGGGGTTCAGCTGGTGAGGCTGTCCCTGTAGGAAGAAAGCTCTG	NM_001002857.1		0.512862
ILMN_1711899	0.981389	0.895	ANXA2	0.133036	-5.81352	0.0627209	50845385	ANXA2	TCACTCTACCCGGAGAGTTTCCCGCTTGGTTGAACACATTGGCCTCAGGA	NM_001002857.1		0.048177
ILMN_1694548	0.804947	0.0709	ANXA3	-1.9068	-4.23042	-0.511818	96304463	ANXA3	GGTGGAGATGACTGAACCAAGAAGATAATCTCCAAAGGTCCACGATGGGC	NM_005139.2		1.14935
ILMN_1711408	0.989832	0.944	ANXA4	-0.0713738	-5.81956	-0.0199964	4809272	ANXA4	CCGGTCAGTAAGAATGCCCATCCAGTTTTCTATATTTCATAGTCAAAGCC	NM_001153.2		0.025028
ILMN_1741003	0.963709	0.791	ANXA5	0.268571	-5.78747	0.132236	4809273	ANXA5	GTGCCTGCACCACCCCACTGCCTTCCTTCAGCACCTTTAGCTGCATTTGT	NM_001154.2		0.101824
ILMN_2326591	0.832291	0.0879	ANXA6	1.79362	-4.39969	1.08125	71773414	ANXA6	CCATCCATTTCACCACCCATCTCCATCCAGGCCGCGCTAGAGTACTGGAC	NM_004033.2		1.05601
ILMN_1678612	0.965439	0.806	ANXA6	0.248188	-5.79251	0.088341	71773328	ANXA6	GCCTGGGTTCAAATCTGCATCTGCCATGCACTTGTTTCTGACCTTAGGCC	NM_001155.3		0.093665
ILMN_1662322	0.950052	0.406	ANXA7	0.848069	-5.48354	0.15869	4809278	ANXA7	TTTTCTTCCTATCCTGTTTTCTCTCCTGTTTCTTTGGATTATAGCAGTGA	NM_004034.1		0.391474
ILMN_1703791	0.950052	0.601	ANXA7	-0.531246	-5.68765	-0.128768	4809278	ANXA7	ACTGAAAGCTCTGCCTTCCGGAATCCCTCTAAGTCTGCTTGATAGAGTGG	NM_004034.1		0.221126
ILMN_2095610	0.950052	0.458	ANXA8	0.755969	-5.55202	0.136504	91823261	ANXA8	GGCCCTTATGTACCCGCCATACAGATACGAAGCCAAGGAGCTGCATGACG	NM_001040084.1		0.339135
ILMN_2217601	0.713577	0.0405	ANXA9	2.18938	-3.77912	0.927047	4502102	ANXA9	CGCTGTACTTTGCTGACAAACTTCATCAAGCCCTCCAGGAAACTGAGCCC	NM_003568.1		1.39254
ILMN_1737918	0.942548	0.21	C1QA	-1.29495	-5.05205	-0.473917	7705752	C1QA	ACCAACAAGGGGCTCTTCCAGGTGGTGTCAGGGGGCATGGTGCTTCAGCT	NM_015991.1		0.677781
ILMN_1796409	0.942548	0.21	C1QB	-1.29434	-5.05274	-0.707237	87298827	C1QB	CAGGCCACCGACAAGAACTCACTACTGGGCATGGAGGGTGCCAACAGCAT	NM_000491.3		0.677781
ILMN_1785902	0.950052	0.338	C1QC	-0.981772	-5.37129	-0.594365	56786154	C1QC	ATGGTGGGCATCCAGGGCTCTGACAGCGTCTTCTCCGGCTTCCTGCTCTT	NM_172369.2		0.471083
ILMN_1716957	0.950052	0.411	C1QL1	0.838852	-5.49072	0.148291	34222385	C1QL1	TACAATAGGACTGTTTACTGCCCACCTCCGCCTGCCAGCCCACCCCAGCC	NM_006688.3		0.386158
ILMN_1756236	0.950052	0.357	C1QL2	0.942483	-5.40582	0.29412	141802463	C1QL2	TTGGAAAAGACAAATCCCTGCGTCCTCCCTGCCCCGCTCCTGGCCTCAGT	NM_182528.2		0.447332
ILMN_2050970	0.950052	0.329	C1QL3	1.00077	-5.35413	0.17713	58801558	C1QL3	GTCCATTCATAGTGTGGGGAAGAATGATTTTTGCCCTGCAGGAGAAGGTC	NM_001010908.1		0.482804
ILMN_1776576	0.954624	0.681	C1QL3	0.417328	-5.73885	0.0689898	58801558	C1QL3	GTTTGAACACTGGATTCGTATGGCTAACGTCAGTGAATCAAGGATCCCAG	NM_001010908.1		0.166853
ILMN_1808117	0.950052	0.375	C1QL4	-0.907301	-5.43566	-0.646605	56606141	C1QL4	TAAAACAGGGTAGTGCAGGTTCTCCGTCACAACTTTCTCTCGCCACCCTC	NM_001008223.1		0.425969
ILMN_2380237	0.950052	0.437	C1QTNF1	-0.793695	-5.52486	-0.47682	38372912	C1QTNF1	CCCTAAGTCCCTCTCTTTAAAGAACTTCTGCGGGTCAGACTCTGAAGCCG	NM_198594.1		0.359519
ILMN_1694608	0.953655	0.675	C1QTNF1	-0.425822	-5.73545	-0.192853	38372916	C1QTNF1	ATAGCCCCTCTCCACCTCACCCCATGTTGATGCCCAGGGTCACTCTTGCT	NM_198593.1		0.170696
ILMN_1701459	0.957056	0.746	C1QTNF1	0.328434	-5.77041	0.0737682	38372916	C1QTNF1	AAGCGCCCCGAAGGCCCGATGCCTGACGGCTCATGCGGCCTCCTTGTTTG	NM_198593.1		0.127261
ILMN_1813307	0.950052	0.567	C1QTNF2	0.58241	-5.66077	0.0931725	94818737	C1QTNF2	GGCCAAGGTAAGAACTGAGAAGGGAGGCATGAGGCGTGAGGCTGGAAGAT	NM_031908.4		0.246417
ILMN_1768925	0.950052	0.238	C1QTNF3	1.21507	-5.14066	0.61844	62739184	C1QTNF3	GATGATGTGAACAGCCATGTGAATAGGTGACTTGGGCACACAGCAGGGTC	NM_030945.2		0.623423
ILMN_1804604	0.958786	0.767	C1QTNF3	-0.30093	-5.77867	-0.127955	62739182	C1QTNF3	CTTCTACAGACCTAAAATCCCTGAGACCAGATGAGCTACCGCACCCCGAG	NM_181435.4		0.115205
ILMN_2195462	0.95755	0.758	C1QTNF4	-0.312659	-5.77524	-0.0556393	13994272	C1QTNF4	ACCGAGTTCGTCAACATTGGCGGCGACTTCGACGCGGCGGCCGGCGTGTT	NM_031909.1		0.120331
ILMN_1744487	0.903023	0.146	C1QTNF5	-1.51292	-4.78696	-0.95668	49472831	C1QTNF5	GTCCTGCTGCTGGCAAGGAATGGGAACAGTGGCTGTCTGCGATCAGGTCT	NM_015645.2		0.835647
ILMN_1729288	0.461847	0.00791	C1QTNF6	-2.9474	-2.4154	-1.32321	32967293	C1QTNF6	CCAAGTGCCAGGAAGACCTGTGCTATAAACCACCCTGCCTGATCCTGCCC	NM_031910.3		2.10182
ILMN_1689102	0.956211	0.732	C1QTNF6	0.347195	-5.76437	0.116054	32967293	C1QTNF6	GGGGTGAAGTGGCCCCCGAAGAATGGAACCCACACCCATAGCTCTCCCCA	NM_031910.3		0.135489
ILMN_2361181	0.960536	0.777	C1QTNF6	-0.286775	-5.78264	-0.190376	32967299	C1QTNF6	ATCTGAACTTCCGTTTCCCCAGGGCCTCCAGCTGCCCTCAGACACTGATG	NM_182486.1		0.109579
ILMN_1662935	0.950052	0.408	C1QTNF7	0.844433	-5.48638	0.227001	34222147	C1QTNF7	GGAGACAGCAAAGGTGGTTTGAGGTAGTCACCTGCTTACAGATAACAGCC	NM_031911.3		0.38934
ILMN_1684558	0.970225	0.837	C1QTNF9	-0.208303	-5.80121	-0.0592516	65301114	C1QTNF9	GCTTTAAGCTGGTGATGCTGTCATACTCCAGAAAGCTGTAGACACTGCTC	NM_178540.3		0.0772745
ILMN_1654875	0.950052	0.406	CLC	0.849361	-5.48253	0.155801	20357558	CLC	CATGAACAGCCGTGAGTATGGGGCCTGGAAGCAGCAGGTGGAATCCAAGA	NM_001828.4		0.391474
ILMN_1653166	0.617522	0.0222	CLEC10A	-2.47826	-3.28168	-1.28785	53832015	CLEC10A	ATAGATAACATTGCCATCGCCCCCACCAGTCCCCTCATGCCTCTGGGCAG	NM_006344.2		1.65365
ILMN_2415303	0.626953	0.0245	CLEC10A	-2.43088	-3.36543	-1.56028	53832015	CLEC10A	CCAGGCCAGTGATCTACTTCTTTTTCACTATTTATTGGCCTTGCCTCTTC	NM_006344.2		1.61083
ILMN_1704797	0.950052	0.616	CLEC10A	0.509319	-5.69844	0.224723	53832017	CLEC10A	GCTCCAGGAACACACTACGCAGAAGGCACACCTAGGCCACTGTCCCCACT	NM_182906.2		0.210419
ILMN_1807359	0.90091	0.145	CLEC11A	-1.51681	-4.78194	-0.354563	37595568	CLEC11A	ACCACGACTGCCAGCGGCGTCTCTACTACGTCTGCGAGTTCCCCTTCTAG	NM_002975.2		0.838632
ILMN_2292178	0.918673	0.168	CLEC12A	-1.42888	-4.89309	-1.06625	94557289	CLEC12A	CCCTCTCATGTATGGCGTCCAGCAGCCTTGTTTCTGACTCTTCTGTGCCT	NM_138337.4		0.774691
ILMN_1663142	0.950052	0.35	CLEC12A	-0.956126	-5.39398	-0.463575	94557292	CLEC12A	GGTGGCATGGCTCCCCATCTCGGGTCCATCCTATACTTCCATGGGACTCC	NM_201623.2		0.455932
ILMN_2403228	0.980477	0.889	CLEC12A	-0.141717	-5.81237	-0.0282895	94557289	CLEC12A	GAACCCTGGAGGAAGAGGAAGTCCATTCAGATAGTTGTGGGGGGCCTTCG	NM_138337.4		0.0510982
ILMN_1657527	0.950052	0.358	CLEC12B	0.940558	-5.40748	0.162016	45504360	CLEC12B	GGTGTTGCTACTAGACTGAGGGTTTCCAGGAGTAGTACTATGACATCATG	NM_205852.1		0.446117
ILMN_2142185	0.537238	0.0133	CLEC14A	-2.71319	-2.85547	-0.492302	28269706	CLEC14A	AGTGGAAGTGCCTTTAGGATGGTGATACTGGGGGACCGGGTAGTGCTGGG	NM_175060.1		1.87615
ILMN_1691339	0.950052	0.444	CLEC1A	0.780729	-5.53433	0.209121	37577102	CLEC1A	CCATCAGTAAAGACCCCATCTGCCTTGTCCATGCCGTTTCCCAACAGGGA	NM_016511.2		0.352617
ILMN_1745103	0.950052	0.287	CLEC1B	1.09275	-5.26694	0.195219	153252028	CLEC1B	CAGAAGTCGAATGAGGTCTGGAAGTGGGAGGATGGCTCGGTTATCTCAGA	NM_016509.3		0.542118
ILMN_3250023	0.883135	0.127	CLEC2D	-1.59209	-4.68271	-0.737675	112382217	CLEC2D	CTGCAAGCCCAGTAGACTTTGTCCCAGGCCATTTATGTGATCTTCACCCC	NM_013269.3		0.896196
ILMN_1711702	0.950052	0.362	CLEC2D	-0.932738	-5.41419	-0.561456	112382217	CLEC2D	CTTGAGACAAGAACAGTATGGGGCTCCCTGGTGTGATTCCGTCCTGCGCG	NM_013269.3		0.441291
ILMN_1670101	0.950052	0.365	CLEC2D	-0.926765	-5.41928	-0.335201	112382218	CLEC2D	GCCAACTTGTATGTTGCAAAGGTTTCACAAGTTCCTCGAATGAATCCAAG	NM_001004419.2		0.437707
ILMN_3250902	0.953598	0.674	CLEC2D	-0.426171	-5.73531	-0.0638135	112382218	CLEC2D	GTGATTTGACAGGTGGAACTAAAGAAGACTCGAGGTCTCTCTGACCTCCT	NM_001004419.2		0.17134
ILMN_2220735	0.950052	0.605	CLEC3A	0.525985	-5.69028	0.0924705	62751806	CLEC3A	AGCATCCTTACTCTCACCTTTTATGAGATTGAGAGTGGACTTACATTTCC	NM_005752.2		0.218245
ILMN_2220729	0.994004	0.97	CLEC3A	-0.0376343	-5.82132	-0.00969457	62751806	CLEC3A	CTCCTGGTGGGACTTGTATCTTGTCTGCCATATCAGAACACAAACCCCTG	NM_005752.2		0.0132283
ILMN_1682176	0.950052	0.277	CLEC3B	1.11676	-5.24307	0.456006	4507556	CLEC3B	CCCGCATCGCCTACAAGAACTGGGAGACTGAGATCACCGCGCAACCCGAT	NM_003278.1		0.55752
ILMN_1808979	0.950052	0.547	CLEC4D	0.613017	-5.64355	0.108297	37577120	CLEC4D	GACTTAGAGATGAGAATGCCAAAGGTCAGTGGCGTTGGGTGGACCAGACG	NM_080387.4		0.262013
ILMN_1771664	0.994984	0.974	CLEC4E	0.0329414	-5.82148	0.00560895	90577173	CLEC4E	GGCTGTAACCAAGTCCACCCATCCCTGGGGCTTCCTTTGCTCTGCCTTAT	NM_014358.2		0.011441
ILMN_1723115	0.886496	0.132	CLEC4F	-1.56785	-4.71506	-1.24613	47778939	CLEC4F	AGCCTCTGAGCTCTGCTTGTTCTCTGGGACCTTCCGTTGGCCTTGTGGAC	NM_173535.2		0.879426
ILMN_2193817	0.960387	0.777	CLEC4G	0.287702	-5.78239	0.24925	38348295	CLEC4G	TCTGGGACCTCCATGCCGACCTCATCCTAACTCCACTCACGCAGACCCAA	NM_198492.1		0.109579
ILMN_1780465	0.738383	0.0472	CLEC5A	-2.11382	-3.90352	-0.706473	31747574	CLEC5A	CTAGGTCAGCCAACCCCCATCCAACCCTTAGACTCACGAACAAATCCACC	NM_013252.2		1.32606
ILMN_2323992	0.950052	0.283	CLEC7A	1.10239	-5.25741	0.434863	88999594	CLEC7A	GACTCAGAGATTCTCTTTTGTCCACAGACAGTCATCTCAGGAGCAGAAAG	NM_197950.2		0.548214
ILMN_1700610	0.950052	0.618	CLEC7A	0.506458	-5.69981	0.086728	88999592	CLEC7A	CCTAGCCCACATGATTTGACTCAGAGATTCTCTTTTGTCCACAGACAGTC	NM_197948.2		0.209012
ILMN_1654504	0.991274	0.952	CLEC7A	0.0610083	-5.82022	0.0226898	88999595	CLEC7A	AACAAGCGGAGCTGAAGAAGAAAGTACAATATGGTGCTGTCTTCCTAATG	NM_197954.2		0.0213631
ILMN_1673238	0.897605	0.142	CLEC9A	1.52727	-4.76836	0.352546	141803213	CLEC9A	GAAGCTATGATTACTGGGTGGGGTTGTCTCAGGATGGACACAGCGGACGC	NM_207345.2		0.847712
ILMN_2068274	0.956262	0.738	CLEC9A	-0.338584	-5.76718	-0.147779	46409325	CLEC9A	CTGGCCTGTTGCCAGCAGAGAGATCCCAGTCAGCTAACCAAGTCTGTGGA	NM_207345.1		0.131944
ILMN_1662962	0.929615	0.194	COLEC10	-1.34441	-4.99483	-0.625697	18105033	COLEC10	GTAGGTGCTTTGAACCCCTTTCTGTAGGCTCACACCTTAATCTCAGGCCC	NM_006438.2		0.712198
ILMN_2298189	0.950052	0.468	COLEC11	0.740299	-5.56294	0.242667	40548419	COLEC11	ACAGCCAGTCGTGACAGCTTCTGACATCTCCAAAAGGAAGTGCACCTCGT	NM_199235.1		0.329754
ILMN_2414268	0.950052	0.484	COLEC11	0.713061	-5.5814	0.364699	40548419	COLEC11	AAGATCTACCTGCTGGTGAAGGAGGAGAAGCGCTACGCGGACGCCCAGCT	NM_199235.1		0.315155
ILMN_1735192	0.950052	0.555	COLEC11	-0.599687	-5.65115	-0.149406	40548418	COLEC11	GAGCTGTCCCTCTGTGAAGGGTGGAGGCTCACTGAGTAGAGGGCTGTTGT	NM_024027.3		0.255707
ILMN_1689088	0.950052	0.348	COLEC12	0.960571	-5.39008	0.18247	18641359	COLEC12	GTGCACATGGACTGAATCACATAGATTCTCCTCCGTCAGTAACCGTGCGA	NM_130386.1		0.458421
ILMN_1679049	0.992667	0.96	COLEC12	0.0502109	-5.82079	0.0191687	18641357	COLEC12	GTTCCTGGGTTCCGTATGATTCCAGACTGACGCTGAACATCTGTGCCTGC	NM_030781.2		0.0177288
ILMN_1666894	0.926932	0.19	CSPG4	-1.35691	-4.98009	-0.295976	126091140	CSPG4	ACTAGGGCAGGCAGCTGGGGGCACTTGGTTCCATGGAGCCTGGATAAACA	NM_001897.4		0.721246
ILMN_1688184	0.950052	0.473	CSPG5	-0.732057	-5.56859	-0.210909	139394620	CSPG5	CGCCCAAACTTGAGGGTGGCAAAGGTGACCAGGCTGACTTGGATGTGAAC	NM_006574.3		0.325139
ILMN_3247713	0.734807	0.0455	ELFN1	2.13155	-3.87457	0.383805	191252815	ELFN1	TTTAAAAAGACATAAAATGCCATCCGTGGGGGGTGTGGCCGGCGTGGCCA	NM_001128636.1		1.34199
ILMN_1658685	0.969061	0.827	ELFN2	-0.221109	-5.79858	-0.0482124	146149115	ELFN2	AGTCCCCAAGTTGGCTGTGGTTGGGCACCTGGTTTGGGTCCTGCAGAGCT	NM_052906.3		0.0824945
ILMN_1685917	0.950052	0.593	EMCN	0.542631	-5.68188	0.170233	20070283	EMCN	GCTGGAAGGCAGATCCGGGCACACCAGAAAATGGAAATGATCAACCTCAG	NM_016242.2		0.226945
ILMN_1715452	0.927123	0.191	FREM1	1.35422	-4.98327	0.518943	122056682	FREM1	GCCACTGGGAGTGGATCGGTGGTGAACCTGTTGCCTTCACCAATGGGAGA	NM_144966.4		0.718967
ILMN_2091978	0.950052	0.391	FREM2	-0.876041	-5.4613	-0.457647	120431610	FREM2	CCACCACCAAGAGCCGGAAGAAGAGAGAGATCAGGAGCACACCCTCACTG	NM_207361.4		0.407823
ILMN_1801516	0.950052	0.602	GPC1	-0.530031	-5.68826	-0.193387	4504080	GPC1	GGATCAGGAGCCCCCAACACAGGCAAGTCCACCCCATAATAACCCTGCCA	NM_002081.1		0.220404
ILMN_1651642	0.950052	0.537	GPC2	0.628752	-5.63437	0.193857	22749458	GPC2	CAGGGGACTGAGGGTGCTTGAGTAGGATGTGAGACTTCATGGGCCTGGGT	NM_152742.1		0.270026
ILMN_2051972	0.615133	0.0218	GPC3	2.48542	-3.26893	0.926553	5360213	GPC3	GGCAACTCCGAAGGACAACGAGATAAGCACCTTTCACAACCTCGGGAACG	NM_004484.2		1.66154
ILMN_1789502	0.955042	0.71	GPC4	-0.377352	-5.75396	-0.126742	21614524	GPC4	GTCCCAGGCCAAAGACTAACAACTGCCTTGGGAATCCCTTCCTTGTGTCC	NM_001448.2		0.148742
ILMN_1688886	0.964933	0.801	GPC5	-0.255065	-5.79085	-0.161387	34106705	GPC5	TGCATCTTTGGTATTGTGCCTCTGCTCCCATCTCTCTCTTTGCCTCATAG	NM_004466.3		0.0963675
ILMN_1805216	0.970633	0.842	GPC6	-0.201909	-5.80247	-0.037887	8051601	GPC6	ACCGGGTGCCAGACTGAACTGCTTCCTCTTTCCTTCAGCTATCTGTGGGG	NM_005708.2		0.0746879
ILMN_2124585	0.95493	0.687	GREM1	0.408831	-5.74219	0.108572	71164890	GREM1	CGGCAAAGAATTATATAGACTATGAGGTACCTTGCTGTGTAGGAGGATGA	NM_013372.5		0.163043
ILMN_1752965	0.964294	0.795	GREM1	0.263054	-5.78887	0.0884268	71164890	GREM1	GGGGAAACAAAATCTTGACCCAGCTGAACATGTCTTCCTGAGTCAGTGCC	NM_013372.5		0.0996329
ILMN_1668593	0.950052	0.252	HPX	-1.18052	-5.17749	-0.65762	11321560	HPX	TATCCTGGACTCTGTGGATGCGGCCTTTATCTGCCCTGGGTCTTCTCGGC	NM_000613.1		0.598599
ILMN_2165993	0.950052	0.238	ITLN1	1.21644	-5.13917	0.393504	31542985	ITLN1	ACGCCTTGTGTGCTGGAATGAGGGTCACCGGATGTAACACTGAGCACCAC	NM_017625.2		0.623423
ILMN_1723978	0.950052	0.276	LGALS1	1.11916	-5.24066	0.238616	85815826	LGALS1	AGACAGCAACAACCTGTGCCTGCACTTCAACCCTCGCTTCAACGCCCACG	NM_002305.3		0.559091
ILMN_1776283	0.990665	0.948	LGALS12	0.0659618	-5.81992	0.0286236	20127658	LGALS12	GGCCCCACTCTCCTCCCCTCATTAAACCATCCACCTGACACCAGCACATC	NM_033101.2		0.0231917
ILMN_1687306	0.950408	0.627	LGALS2	-0.493166	-5.7061	-0.113358	51173752	LGALS2	CATTGGACGGCAGCAACTGGGGGCAAGAACAACGGGAAGATCACCTGTGC	NM_006498.2		0.202732
ILMN_1803788	0.882581	0.125	LGALS3	-1.60125	-4.67038	-0.323945	4504982	LGALS3	CCTCACCAGTGCTTCATATACCATGATATAATCTGAAAGGGGCAGATTAA	NM_002306.1		0.90309
ILMN_1694034	0.950925	0.638	LGALS4	0.477313	-5.71339	0.0913905	6006017	LGALS4	CCTCAGGGGACATAGCTCTGCACATTAATCCCCGCATGGGCAACGGTACC	NM_006149.2		0.195179
ILMN_1661708	0.950052	0.427	LGALS7	0.810448	-5.5124	0.169939	4504984	LGALS7	ATCTTCTGAGCAGAAGCCCAGGCGGCCCGGGGCCTTGGCTGGCAAATAAA	NM_002307.1		0.369572
ILMN_2356654	0.950052	0.472	LGALS8	0.733264	-5.56777	0.11723	42544192	LGALS8	GAAAGTGTACGCCAACTAAGGGACCCACAAAGCAGGCAGAGGTAATGCAG	NM_201545.1		0.326058
ILMN_2266214	0.97376	0.858	LGALS8	-0.180758	-5.80634	-0.0349873	42544192	LGALS8	GGAAGATAATCGGAAGAGGTAGAAGACACCGTCCATGACACTTCCTGGGG	NM_201545.1		0.0665127
ILMN_2353358	0.975238	0.863	LGALS8	-0.174622	-5.80739	-0.0548942	42544184	LGALS8	CCCATGAAATCACCAATCAAGGCCTCCGTTCTTCTAAAGATTAGTCCATC	NM_006499.3		0.0639892
ILMN_1669930	0.986749	0.928	LGALS8	0.0920637	-5.81794	0.043516	42544190	LGALS8	CAAGGCTCCAGAGGCTGTGCAGGAGGCCGAGCTGGGTGGCGATCAGCGGC	NM_201544.1		0.032452
ILMN_1715760	0.626953	0.0238	LGALS9	-2.44528	-3.34005	-1.36832	102469529	LGALS9	TCCAGCTGCTGGAATCCTACCATCCCAGGAGGCAGGCACAGCCAGGGAGA	NM_009587.2		1.62342
ILMN_2412214	0.955042	0.704	LGALS9	0.385823	-5.75088	0.239093	102469529	LGALS9	GAGAATGCTGTGGTCCGCAACACCCAGATCGACAACTCCTGGGGGTCTGA	NM_009587.2		0.152427
ILMN_1715814	0.959007	0.768	LMAN1	0.298425	-5.77939	0.0635725	10862689	LMAN1	AACCTGCCACTACATTCTGGTTTACATTAGTTACTTCATGCTGGCTGGGG	NM_005570.2		0.114639
ILMN_1783566	0.950052	0.424	LMAN1L	0.816907	-5.50753	0.149689	75677362	LMAN1L	CATCACTGGGAAGCAGGCAGTGTCTTGGGTGGGGGCTTGGTCAGTATCCT	NM_021819.2		0.372634
ILMN_1762464	0.950052	0.53	MBL2	0.638856	-5.62836	0.115171	4557738	MBL2	TGAAGTGCTCCAGTCAGGCCTATCTAAACTGGATTCACAGCTCTGTCACT	NM_000242.1		0.275724
ILMN_1756992	0.569071	0.016	MUC1	-2.62967	-3.00893	-0.714473	113206025	MUC1	TAGCGGGGATCCTGAACTGGACTGAATAAAACGTGGTCTCCCACTGCGCC	NM_001044391.1		1.79588
ILMN_1677314	0.813478	0.0749	MUC1	-1.87829	-4.27372	-0.587157	65301116	MUC1	TCTACTGGGGTCTCTTTCTTTTTCCTGTCTTTTCACATTTCAAACCTCCA	NM_002456.4		1.12552
ILMN_2371911	0.849467	0.0958	MUC1	-1.74726	-4.46693	-0.777973	113206023	MUC1	CCCACCAATTTCTCGGACACTTCTCAGTGTGTGGAAGCTCATGTGGGCCC	NM_001044390.1		1.01863
ILMN_1651568	0.967742	0.818	MUC13	0.2325	-5.79611	0.196581	51593089	MUC13	AAACTGTCTGGCAAAGGGTGCGAGAGGGAGCTTGTGCTCAGGAGTCCAGC	NM_033049.2		0.0872467
ILMN_1793537	0.929535	0.193	MUC15	-1.34585	-4.99314	-0.586006	40255097	MUC15	GAAGCTGACAATGACTGCATTCAACGGGGCCATGGCAGGAAAGCTGACCC	NM_145650.2		0.714443
ILMN_2125346	0.950052	0.457	MUC16	0.75829	-5.55038	0.130178	83367076	MUC16	ACCTGGAGGATCTGCAATGACTGGAACTTGCCGGTGCCTGGGGTGCCTTT	NM_024690.2		0.340084
ILMN_2205622	0.950052	0.515	MUC2	0.662969	-5.61364	0.123344	116284391	MUC2	TGCTCCTGCTGCAAAGAGGAGAAAACCAGCCAGCGTGAGGTGGTCCTGAG	NM_002457.2		0.288193
ILMN_1653278	0.950052	0.237	MUC20	-1.21923	-5.13616	-0.585999	149193326	MUC20	GCTGCGTTACTGTGCTGAGAGGTACCCAGAAGGTTCCCATGAAGGGCAGC	NM_001098516.1		0.625252
ILMN_1727314	0.950052	0.36	MUC4	0.936667	-5.41083	0.170208	112382234	MUC4	GGGAGCCAGGGGGACTTTTGCCGCAGCCATGAAGGGGGCACGCTGGAGGA	NM_018406.3		0.443697
ILMN_1792039	0.950052	0.59	MUC4	0.548194	-5.67901	0.0982642	112382234	MUC4	GCCGTGGAGCTTCCCCAGGGAGCCAGGGGGACTTTTGCCGCAGCCATGAA	NM_018406.3		0.229148
ILMN_2246555	0.950925	0.65	MUC4	0.460323	-5.72094	0.0859465	112382234	MUC4	GCAGTGCTACCTCAGCTTCCACAGTATCCTCGGACTCCCCTCTGAAGATG	NM_018406.3		0.187087
ILMN_2321153	0.978092	0.879	MUC4	-0.154279	-5.81059	-0.0310034	112382234	MUC4	GCGCCATTGCTTTTGGGAGACTGGAAAAGGGAAGGTGACTGAAGGCTGTC	NM_018406.3		0.0560111
ILMN_1810978	0.950052	0.59	MUCL1	-0.547807	-5.67921	-0.232572	109948298	MUCL1	CACTGCTGCTCCTACCACTGCAACCACCGCTGCTTCTACCACTGCTCGTA	NM_058173.2		0.229148
ILMN_1734542	0.975238	0.863	OVGP1	-0.174531	-5.8074	-0.0413821	58386719	OVGP1	CTTCTCATCCCGGGGCAAAGCAGGCATCAAAACCAGAATAGGCCAATCTC	NM_002557.3		0.0639892
ILMN_1656560	0.998387	0.99	PARM1	0.0133191	-5.82192	0.00285803	54400757	PARM1	GCCCTTCATCTTGCTTGCAAGTGTGCATGGTTCAATCCCTCACATCCAGG	NM_015393.2		0.00436481
ILMN_1815568	0.976374	0.87	PLXDC1	0.165779	-5.80883	0.0284691	21361852	PLXDC1	GGTAGAATTCAAAGATCTGGGGACTGAGGGCACCCAGCCTTCTAAAACAC	NM_020405.3		0.0604807
ILMN_1753312	0.968066	0.821	PLXDC2	-0.229082	-5.79687	-0.0384986	40255004	PLXDC2	AGCTGCTGTAGCCTGAAGAAGACAAGATTTCTGGACAAGCTCAGCCCAGG	NM_032812.7		0.0856568
ILMN_1791569	0.950052	0.283	PLXNA1	-1.10391	-5.2559	-0.347957	49355817	PLXNA1	TAGCTGTCCTTTAACACCGCAGAACCCCCTCCCAGAAGAAGAGCGATCCC	NM_032242.2		0.548214
ILMN_1680617	0.950052	0.352	PLXNA2	0.953338	-5.39641	0.167451	113722115	PLXNA2	TGGGAGTCTCAGATGGAAGGACAAGTGATGGGGATCAGGCCCCAGAGCTT	NM_025179.3		0.453457
ILMN_1719972	0.950052	0.401	PLXNA3	-0.857124	-5.47641	-0.412748	59710103	PLXNA3	TCCTCCTGAGCCTACTGCCAAACGTCCTCAGTGTTGTCTGCACCTGCTCC	NM_017514.2		0.396856
ILMN_3223471	0.820228	0.0772	PLXNA4	1.86194	-4.29835	0.346632	157738642	PLXNA4	GGGCCAGAAGCGGAAAATGAAATCCCTGGATGAGTCGGCCCTGTGCATCT	NM_181775.3		1.11238
ILMN_3231841	0.971729	0.848	PLXNA4	-0.194335	-5.80391	-0.0467904	157738646	PLXNA4	CGTCCCAGGAGTTCCATGTGAAACTGGCTCTGTGTGCATTGAAGCATGGC	NM_001105543.1		0.0716041
ILMN_3231596	0.972067	0.851	PLXNA4	0.190463	-5.80462	0.0483089	157738642	PLXNA4	TCCTTCGGCACAGGTCCACAAGGGGGAATCACCCAGGAGTGGATTGGAGT	NM_181775.3		0.0700704
ILMN_1742330	0.325346	0.00284	PLXNB1	-3.39653	-1.54173	-0.789419	41152087	PLXNB1	AGAGTTGAACGCCTCTCCTAGGCCACTACAAACTGACCCCTCAGCAGGGC	NM_002673.3		2.54668
ILMN_1686313	0.965439	0.807	PLXNB3	0.247528	-5.79266	0.063295	10864080	PLXNB3	GGTCGCCGCCCTGGTGGAAAACAAAGTGACTGACCTGTGAGCTCTGGCTC	NM_005393.1		0.0931265
ILMN_2117623	0.950052	0.557	PLXNC1	-0.597921	-5.65215	-0.193601	5032222	PLXNC1	GGTTCCACTTTGGGCACTGTCTTTTTAAGAGACCAAGGCACATGCACAGC	NM_005761.1		0.254145
ILMN_1675222	0.958786	0.767	PLXND1	0.299971	-5.77895	0.0573344	28933450	PLXND1	CCATGGGGGCTGGAGGGGGGCAGCTGGGACTCTGGAATCTTCTTTATAAT	NM_015103.1		0.115205
ILMN_1729476	0.9777	0.875	PROL1	-0.159279	-5.80984	-0.0697588	116805343	PROL1	CTCGCCAACCGTCCTCACACAGTATTGCTCAATGCCACTGTCCAAGTTAC	NM_021225.4		0.0579919
ILMN_1757504	0.950052	0.559	REG3A	0.593906	-5.6544	0.112243	21070994	REG3A	CCTGGGAGGGCTCGGGGATGGGAGAGTACACAGATTCACAACTCATTCAG	NM_138938.1		0.252588
ILMN_2382679	0.992994	0.962	REG3A	0.0487381	-5.82086	0.00936958	21070992	REG3A	CCTCCCCGCTGTCATTTCAGTCTCTTCATTTTGTCATACGGCCTAAGGCT	NM_138937.1		0.0168249
ILMN_1685062	0.649925	0.0286	REG3G	-2.35823	-3.4923	-1.20692	56699412	REG3G	ATTCTCCCCAAACTGCCCTACCTGACTACCTTGTCATGATCCTCCTTCTT	NM_001008387.1		1.54363
ILMN_1676795	0.950052	0.354	REG3G	-0.94903	-5.40016	-0.347882	56699412	REG3G	CTGTGTGTCCTCCCGCTGACCACACTTCCTTTAGTGACCCGATTGCCTCC	NM_001008387.1		0.450997
ILMN_2169383	0.950052	0.4	REG4	0.8604	-5.47382	0.178333	36054181	REG4	GGTCTGGCAAGTCCATGGGTGGGAACAAGCACTGTGCTGAGATGAGCTCC	NM_032044.2		0.39794
ILMN_1800038	0.950052	0.224	SDC1	1.25328	-5.09886	0.668572	55749479	SDC1	GACCACAGCTCCCGAAAGCGACGTTCGGCCACCGGAGGAGCGGGAGCCAA	NM_001006946.1		0.649752
ILMN_1815308	0.950052	0.486	SDC1	-0.709627	-5.58368	-0.108851	55749479	SDC1	ACTGCGACTTTCTGCCTGGAGTGTATGACTGCACATGACTCGGGGGTGGG	NM_001006946.1		0.313364
ILMN_1768953	0.950052	0.564	SDC1	0.585999	-5.65879	0.113811	55925657	SDC1	GGGGGGCCAGTTTTTGCAACGGCTAAGGAAGGGCCTGTGGGTTTATTATA	NM_002997.4		0.248721
ILMN_1784553	0.955706	0.718	SDC2	-0.365734	-5.75807	-0.186384	55925658	SDC2	AGCTTTCTAAAGCCACGCTGTGTCCCTCAATTACAGAGGGTAGGAATGGG	NM_002998.3		0.143876
ILMN_1753523	0.950925	0.65	SDC3	-0.460015	-5.72107	-0.311351	88947642	SDC3	ACCCACAGAGGTGGCTCAGACCCCAACTCCAGAGACCTTCCTGACCACAA	XM_944729.1		0.187087
ILMN_1802418	0.97959	0.885	SDC3	0.146295	-5.81174	0.075414	57222246	SDC3	AGAAAAAGGATGAGGGCAGCTACACGCTGGAGGAACCCAAGCAGGCGAGC	NM_014654.2		0.0530567
ILMN_1663042	0.950052	0.383	SDC4	0.891876	-5.44842	0.440685	38201674	SDC4	ACTGGCTTAACGAGTCACAGCCTCAGCTGTGCTGGGACGACCCTTGTCTC	NM_002999.2		0.416801
ILMN_1765641	0.970008	0.836	SEMA3A	0.209839	-5.80091	0.1422	100913215	SEMA3A	AACAGGAGGACCCACGAATTTGAGAGGGCACCCAGGAGTGTCTGAGCTGC	NM_006080.2		0.0777937
ILMN_2406299	0.882088	0.124	SEMA3B	1.60436	-4.66618	1.09286	54607088	SEMA3B	AGTCACTGCCCCTGGAGTCGCGGAGAAAGGGCCGTAACCGGAGGACCCAC	NM_001005914.1		0.906578
ILMN_1653501	0.950052	0.369	SEMA3B	-0.918465	-5.42631	-0.371073	54607088	SEMA3B	CTGGGAGACAGACCCCACCTCCTTGGGTAGTGAGCAGTGAGCAGAAAGCT	NM_001005914.1		0.432974
ILMN_1695475	0.950052	0.415	SEMA3C	-0.83186	-5.49612	-0.247195	32307182	SEMA3C	GTCACAGTTCCCTTTATTTCACATAAGCCCAAACTGATAGACAGTAACGG	NM_006379.2		0.381952
ILMN_2099773	0.956262	0.736	SEMA3D	0.341605	-5.7662	0.0985372	41406085	SEMA3D	GGGTTTGAGATAGATGATTTTTGGGAAAGGGCAAAATGTGTCAGATGCCC	NM_152754.2		0.133122
ILMN_1651547	0.885937	0.13	SEMA3E	1.57994	-4.69897	0.379523	6912649	SEMA3E	TCTAAGAGGCACCTCCATCGAGGGCCGGTCTCCTGCTTCTTTAGACCTCT	NM_012431.1		0.886057
ILMN_2154322	0.979375	0.884	SEMA3E	0.147416	-5.81158	0.026872	6912649	SEMA3E	AGCAGCTGTTGTCCTTAAAAATGAATTGACCTGGCCGGGCGCGGTGGCTC	NM_012431.1		0.0535477
ILMN_1761540	0.925383	0.185	SEMA3F	-1.37389	-4.95989	-0.463781	31377801	SEMA3F	GCAGGGCCACCCCACTCTACCTCCTTAGCTTTCCCTGTGCCACTTTGACT	NM_004186.2		0.732828
ILMN_1676067	0.950052	0.573	SEMA3G	-0.572858	-5.66597	-0.176506	9910361	SEMA3G	GGCTCCAGGCAGGGTCCTCTGGGAAGTTACTCTAGAAAACGAAGGGAGGA	NM_020163.1		0.241845
ILMN_1702787	0.750397	0.0516	SEMA4A	2.06901	-3.97607	0.865863	21361913	SEMA4A	TGCCGCTTTGGACACCAACACTCCCTTCTCCCAGGGTCATGCAGGGATCT	NM_022367.2		1.28735
ILMN_1672589	0.763764	0.0564	SEMA4B	-2.02421	-4.04764	-0.950713	39777609	SEMA4B	TGCCTTCCTCCGTTGTTGCGTGAGAACCCGTGTGCCCCTTCCCACCATAT	NM_198925.1		1.24872
ILMN_1781814	0.950052	0.574	SEMA4B	-0.571149	-5.66689	-0.131797	39777607	SEMA4B	CCGGCCTGGCAAGGGGGACGAGTCAGTGGACACTCCAGGAAGAGCGGCCC	NM_020210.2		0.241088
ILMN_2115669	0.95755	0.753	SEMA4C	0.318545	-5.77346	0.0522298	40804743	SEMA4C	AAAGGCTGTGTGAGGGGAGAGAAGGGAGAGGGTGGGCCTGCTGTGGACAA	NM_017789.3		0.123205
ILMN_1687533	0.920218	0.174	SEMA4D	-1.40766	-4.91911	-0.335137	33942063	SEMA4D	GGCGCTGTTCCTGCCACTGTCCTGAAGATGTGAATGGGTGGTACGATTTC	NM_006378.2		0.759451
ILMN_1805007	0.950408	0.628	SEMA4F	-0.492543	-5.70639	-0.308814	141802438	SEMA4F	TCGCACATGGCTCTAGGCTTCTCCTGCTGAGTCCTGGTCTTGGCCTGTGA	NM_004263.3		0.20204
ILMN_1676248	0.950052	0.31	SEMA4G	1.04191	-5.31597	0.390292	28872813	SEMA4G	CACGGGTTTTTACTGCCCTTCACCCAACCTCTCCCACCTCCACCCCACAA	NM_017893.2		0.508638
ILMN_1656927	0.950052	0.564	SEMA5A	0.586815	-5.65834	0.105846	4506880	SEMA5A	GTGGGAGTCAAAGCCTATTTTGCTGAGTGTTCCCACTGGATCCTCTGTAG	NM_003966.1		0.248721
ILMN_1794370	0.950925	0.63	SEMA5B	-0.489288	-5.7079	-0.0866387	91982766	SEMA5B	CCTCAGCCTTGCCCTCAATGCACGAAAGGTGGCCCAGGAGAGAGGATCAA	NM_001031702.2		0.200659
ILMN_1713529	0.950052	0.504	SEMA6A	0.680082	-5.60287	0.242663	145553983	SEMA6A	GGTCCATAAACCCGAGTGTGCCTTTGCTTTCCACCCTTGCTAGACACTGG	NM_020796.3		0.297569
ILMN_1712914	0.703675	0.0383	SEMA6B	-2.21646	-3.73393	-0.693791	19718779	SEMA6B	TTGCCTCCCCCAGCCCCCTCCCCATCAATAAAACTCTGTTTACAACCACC	NM_032108.2		1.4168
ILMN_2360988	0.950052	0.281	SEMA6B	1.10786	-5.25197	0.267973	19718781	SEMA6B	GACATCCTCAACTTTGTCAAGACCCACCCTCTGATGGACGAGGCGGTGCC	NM_133327.1		0.551294
ILMN_1689020	0.950052	0.411	SEMA6B	0.839092	-5.49054	0.156841	19718779	SEMA6B	ACAGCTGCAGACCTAAGCCCTCCCCCACCCCTGGAAAGGTCCCTCCCCAA	NM_032108.2		0.386158
ILMN_1813503	0.950052	0.514	SEMA6C	-0.66436	-5.61277	-0.134665	48255896	SEMA6C	CCTAAAGGAGACGAGCGAATTAACGGTGTCGAGGTGAGCCAGGGCCAGGG	NM_030913.3		0.289037
ILMN_1814494	0.509064	0.0109	SEMA6D	2.803	-2.68831	0.810472	24234743	SEMA6D	CTCTGTCATTCATCAAATCTCATCCCCTGATGGACTCTGCCGTTCCACCC	NM_153619.1		1.96257
ILMN_1753251	0.682898	0.0342	SEMA6D	2.27112	-3.64174	0.773998	24234740	SEMA6D	CACACCTAAAGTGATTGATACCTGGAGACCTAAACTGACAAGCTCTCGGA	NM_153618.1		1.46597
ILMN_1806407	0.950052	0.519	SEMA6D	0.656831	-5.61743	0.104707	24234731	SEMA6D	CCGAGCCTGCTAGGGCGAGGGGGGTGAATGGTTGATGAGTTTAAAAATAA	NM_024966.2		0.284833
ILMN_2317493	0.991107	0.951	SEMA6D	-0.0622042	-5.82015	-0.0108329	24234731	SEMA6D	CCAGTCCTTTCTCTTTGAACGACAGCGTATTACTGGAAGAGATTGAAGCC	NM_024966.2		0.0218195
ILMN_1654540	0.993306	0.964	SEMA6D	0.0454012	-5.82101	0.0325198	24234743	SEMA6D	CCCACCGCCCACCCGGCTCCCGGTGTCTCCTCCCGGCCGCTCTACCCAGC	NM_153619.1		0.015923
ILMN_1756312	0.950052	0.284	SEMA7A	1.0998	-5.25998	0.264499	142365656	SEMA7A	CCTGGGTCCCACAGGACAGCCGCCTTGCATGTTTATTGAAGGATGTTTGC	NM_003612.2		0.546682
ILMN_1703864	0.950925	0.641	SFTA2	0.473453	-5.71513	0.15175	122056695	SFTA2	CCCTTCAGGGACCAGCGTCACCCTCCACCATGCAAGATCTCAACACCATG	NM_205854.2		0.193142
ILMN_1727017	0.950052	0.451	SFTPB	0.769273	-5.54258	0.133314	38504666	SFTPB	CCCACCTAGCCCAGGAGAGAGCTACGGCAGGGTGTGTGTTTTGACACTGA	NM_198843.1		0.345823
ILMN_2359835	0.950052	0.616	SFTPB	0.509123	-5.69853	0.306207	33943098	SFTPB	CCTCTCCAGTGTATCCACAGCCCCGACCTTTGATGAGAACTCAGCTGTCC	NM_000542.2		0.210419
ILMN_2206949	0.950052	0.503	SFTPC	0.681898	-5.60172	0.122578	42476334	SFTPC	AAACGCCCCGGGCAAAGGGTCTTTTGCAGCTTTTGCAGACGGGCAAGAAG	NM_003018.2		0.298432
ILMN_1768575	0.950052	0.311	SFTPD	-1.03894	-5.31878	-0.488824	61699225	SFTPD	GGGCTTGTGGAGAAAAGCGTCTTGTGGTCTGCGAGTTCTGAGCCAACTGG	NM_003019.4		0.50724
ILMN_1745607	0.950052	0.351	A2M	-0.954304	-5.39557	-0.224591	66932946	A2M	CTTGGAAATGCTTGAAGACCACAAGGCTGAAAAGTGCTTTGCTGGAGTCC	NM_000014.4		0.454693
ILMN_2148360	0.950052	0.235	ADAM10	-1.22341	-5.13163	-0.520876	73747882	ADAM10	CTGGACATAGCAGCACATACTACTTCAGAGTTCATGATGTAGATGTCTGG	NM_001110.2		0.628932
ILMN_1718946	0.950925	0.646	ADAM10	0.466379	-5.71828	0.10462	73747882	ADAM10	GAATGGTGGTATTCAGTGGTCCAGGATTCTGTAATGCTTTACACAGGCAG	NM_001110.2		0.189767
ILMN_1711374	0.964782	0.799	ADAM11	-0.257521	-5.79025	-0.0831579	93141025	ADAM11	GGAACATGAGACTTCCTGTGACCAGTCCACCCTGGCTCCCAGCTGTCTGT	NM_002390.4		0.0974532
ILMN_1726266	0.868488	0.111	ADAM12	1.66506	-4.58308	0.700003	73747886	ADAM12	CAGGTTTGAGGGTTTGCAGAAAGCCAGGGAACCCACAGAGTCACCAACCC	NM_021641.2		0.954677
ILMN_1785393	0.955042	0.711	ADAM12	-0.37522	-5.75473	-0.130577	73747884	ADAM12	CTCTGGGGACCAGGTGCTAAACCTGCCCCTGGGATCTGCTTTGAGAGAGT	NM_003474.3		0.14813
ILMN_1705689	0.999883	0.999	ADAM12	0.00065366	-5.822	0.00012065	73747884	ADAM12	CCAATAACCAGGGTGTTTTGTGGTTGGGGGAGGCACGGGGTGGAGTATTC	NM_003474.3		0.000434512
ILMN_1756920	0.950052	0.291	ADAM15	-1.08531	-5.27425	-0.205136	46909595	ADAM15	CGGGATTGAGGAAGGTCCGCACAGCCTGTCTCTGCTCAGTTGCAATAAAC	NM_207195.1		0.536107
ILMN_2384544	0.950052	0.57	ADAM15	0.577101	-5.66367	0.317169	46909589	ADAM15	GGCTTCAAGAGGCGGGCGTGCCCTCTGGAGTCCCCTACCATGACTGAAGG	NM_003815.3		0.244125
ILMN_1751500	0.956211	0.73	ADAM15	-0.35035	-5.76332	-0.239554	46909595	ADAM15	CGCCTGCACCAGCGACTCTGCCAGCTCAAGGGACCCACCTGCCAGTACAG	NM_207195.1		0.136677
ILMN_1765779	0.967574	0.818	ADAM17	0.233593	-5.79587	0.0651248	73747888	ADAM17	CCAAAACTGGACCACCAGAGAATGGACACCATCCAGGAAGACCCCAGCAC	NM_003183.4		0.0872467
ILMN_2121068	0.985799	0.917	ADAM17	0.10495	-5.81672	0.0196477	73747888	ADAM17	CCTGTAATCCCAGCACTTGGAGAGGCTGAGGTTGCGCCACTACACTCCAG	NM_003183.4		0.0376307
ILMN_2201386	0.950052	0.309	ADAM18	1.0445	-5.31352	0.19422	7656860	ADAM18	TCAGATGGAACAGACAATGCCTATGTGGCTGATGGCACCATGTGTGGTCC	NM_014237.1		0.510042
ILMN_1788481	0.881921	0.124	ADAM19	1.60651	-4.66329	0.497904	73747890	ADAM19	AAATTGCATCGTTTCCCAGGACTTCTCCAGGCCTCGGCCGCCCCAGAAGG	NM_033274.2		0.906578
ILMN_1713751	0.950052	0.236	ADAM19	-1.22172	-5.13346	-0.637799	73747890	ADAM19	TCCAAGCCCACATTTCCAAAGTCACCCCCAACGCGTCCTCTCACACCGTC	NM_033274.2		0.627088
ILMN_1682225	0.950052	0.313	ADAM19	1.03465	-5.32281	0.192233	73747891	ADAM19	GTACCAGAGGGCTCCAGGGGGGCAGGTGTAGAGTTGAGAAAACAAAGCAA	NM_023038.3		0.504456
ILMN_1662675	0.950052	0.471	ADAM2	0.734478	-5.56694	0.130241	55743079	ADAM2	ACGCTATTTCTGTTGGTTAGTAGACACTAATTCTGTCAGTAGGGGCATGG	NM_001464.3		0.326979
ILMN_1737629	0.950052	0.579	ADAM20	0.564393	-5.67051	0.114251	50845381	ADAM20	CTGTCACTGCAACCATGAATGGGCACCCCCATACTGCAAGGACAAAGGCT	NM_003814.4		0.237321
ILMN_1812112	0.950052	0.298	ADAM21	1.06723	-5.29181	0.192459	15812182	ADAM21	GGCTATGGGGGCAGTATTGACAGTGGCCCAGCATCTGCAAAGAGAGGAGT	NM_003813.2		0.525784
ILMN_1675210	0.875018	0.114	ADAM22	-1.65005	-4.60384	-0.315875	21536387	ADAM22	CTGTGAAAATGGGCGACCTCGAAGTAACTCTTGGCAAGGTAACCTGGGAG	NM_021723.2		0.943095
ILMN_2351754	0.950052	0.599	ADAM22	0.533844	-5.68634	0.0875406	21536384	ADAM22	GGGACGGAGAAGGGTAACTGTGGGAAAGACAAAGACACATGGATACAGTG	NM_021721.2		0.222573
ILMN_1706302	0.969427	0.831	ADAM22	0.216793	-5.79949	0.0362909	21536385	ADAM22	ACCCATGGTTCAAAAGAGACTATAATGTAGCTAAGTGGGTAGAAGATGTG	NM_021722.2		0.080399
ILMN_2060086	0.950052	0.514	ADAM23	0.664176	-5.61289	0.217514	73765550	ADAM23	AGCTGCGCTGGATGGACACCGCCTTGCACTGTTGGATTCTGGGTATGACA	NM_003812.2		0.289037
ILMN_1664236	0.950052	0.432	ADAM28	0.80126	-5.51926	0.14222	98985829	ADAM28	AGTGTTTAACCATGGTCAAAGGACCATTCTGTCCTATCCTTCTTAGAAGC	NM_021777.3		0.364516
ILMN_1664631	0.950052	0.445	ADAM28	-0.779016	-5.53557	-0.503235	98985829	ADAM28	TGCTTGATGGGGACATGCCCCACACTGCAGGAGCAGTGCACAGAGCTGTG	NM_021777.3		0.35164
ILMN_1802100	0.978346	0.88	ADAM28	-0.152402	-5.81087	-0.0552627	98985827	ADAM28	GGCACCAGGCCACACAAACAGAAGAGGAAACCCCAGATGGTAAAGGCTGT	NM_014265.4		0.0555173
ILMN_2194158	0.950052	0.296	ADAM29	1.07259	-5.28663	0.237398	73765551	ADAM29	CCCAGAGTCAACCTCCTGTGACACCCTCCCAGAGGCAACCTCAGTTGATG	NM_014269.3		0.528708
ILMN_2100871	0.950052	0.404	ADAM30	0.852388	-5.48015	0.160303	31881769	ADAM30	ACCAGTGCATTCTACTTCTCGAGTGTTCACTTGCCCCTCAGTTTGTGACC	NM_021794.2		0.393619
ILMN_2293012	0.950052	0.268	ADAM32	1.13892	-5.22063	0.21264	40316951	ADAM32	GCCAAGGAAGAGGAATTCCCAAGTAGCGAATCTAAATCGGAAGGTAGCAC	NM_145004.4		0.571865
ILMN_1798045	0.961288	0.781	ADAM32	0.28216	-5.7839	0.050544	148664237	ADAM32	AGTGCCATTGTTCGCCAGGCTATAAGCCTCCAAACTGCCAAATACGTTCC	NM_145004.5		0.107349
ILMN_1806841	0.964782	0.799	ADAM32	0.257538	-5.79024	0.0831486	148664237	ADAM32	CCAGCCAATCCAGCTCAGAAGGCAGCACTCAGACATATGCCAGCCAAACC	NM_145004.5		0.0974532
ILMN_1651657	0.69554	0.0363	ADAM33	2.24285	-3.68958	1.58168	24041037	ADAM33	AGGAAGAATGCCTTCCAGGAGCTTCAGCGCTGCCTGACTGCCTGCCACAG	NM_025220.2		1.44009
ILMN_1671297	0.950052	0.32	ADAM33	1.01937	-5.33705	0.180176	24041039	ADAM33	CCCCCATTCTGTGTGTGTCGGGGGGACAGAGGGAACCATTTAAGAAAAGA	NM_153202.1		0.49485
ILMN_1750294	0.966195	0.809	ADAM7	0.245132	-5.79323	0.0481569	114326452	ADAM7	TGGCCGTGCAAGCTTAGGCTGGGGATTCTGGATGCAACGTCTTTACAACC	NM_003817.2		0.0920515
ILMN_1708348	0.950052	0.434	ADAM8	-0.798578	-5.52125	-0.391441	89363018	ADAM8	GCATCCCCAGAAAGACTCCATCCCAGGACCAGGTTCCCCTGCGTGCTCTT	NM_001109.3		0.36251
ILMN_1727524	0.958435	0.764	ADAM9	0.304357	-5.77768	0.0692995	54292119	ADAM9	GTGCTCCCTCCTGTGGTAATAAGTTGGTGGACGCTGGGGAAGAGTGTGAC	NM_003816.2		0.116907
ILMN_2103107	0.950052	0.368	ADAMDEC1	0.92131	-5.42391	0.188872	16753219	ADAMDEC1	CAGGTTTTATGTTATTCCTCTGTGTTCACTTCGCCTTGCTCTTGAAAGTG	NM_014479.2		0.434152
ILMN_1716909	0.986809	0.928	ADAMDEC1	-0.0912806	-5.81801	-0.0178674	16753219	ADAMDEC1	GCCCTAACGTGTAAACTGAAGCCTGGAACTGATTGCGGAGGAGATGCTCC	NM_014479.2		0.032452
ILMN_1673566	0.950052	0.222	ADAMTS1	1.2603	-5.09106	0.349107	50845383	ADAMTS1	GCCGGAACAAAAATGAGGTGTGTAGAACAGGGTCCCACAGGTTTGGGGAC	NM_006988.3		0.653647
ILMN_1751168	0.975314	0.864	ADAMTS10	0.173672	-5.80755	0.029948	56121814	ADAMTS10	TCGGAATATGTACTGTGAAGAGTAGGGGTGGGGAGGTGGTCTGCCGGTGC	NM_030957.2		0.0634863
ILMN_1660970	0.985633	0.916	ADAMTS12	-0.106504	-5.81656	-0.0281891	51558723	ADAMTS12	CCTGTGGAGGTGGCTTTCAGAAGAGGACTGTCCAATGTGTGCCCTCAGAG	NM_030955.2		0.0381045
ILMN_2286570	0.950052	0.49	ADAMTS13	0.702457	-5.58841	0.129115	73695933	ADAMTS13	CCCACGAAGAAGCCGCTGCTCCAGGACGGACCACAGCCACCCCTGCTGGT	NM_139025.2		0.309804
ILMN_2413732	0.966272	0.81	ADAMTS13	-0.243987	-5.79349	-0.0434149	73695935	ADAMTS13	ATGTCCAAAAGGCTAGGGGGTTGGAGGTGGGGACTCTGGAAAAGCAGCCC	NM_139027.2		0.091515
ILMN_1787386	0.986169	0.919	ADAMTS13	-0.102726	-5.81694	-0.0188898	73695935	ADAMTS13	CCATGGGGAGGACGATGGTGAGGAGATCCTGTTGGACACCCAGTGCCAGG	NM_139027.2		0.0366845
ILMN_2358134	0.950052	0.369	ADAMTS14	0.919236	-5.42566	0.167405	110611166	ADAMTS14	CTGGAGGAACATGAGTAGTGGGCCCCTGGCCTGCAACCCCTTTGGAGAGT	NM_139155.2		0.432974
ILMN_1676452	0.950052	0.452	ADAMTS14	0.766826	-5.54433	0.132834	110611168	ADAMTS14	GAGCCTCCTGGAAAGCCAACGGGATCAGAGGACCATCAGCATGGCCGAGC	NM_080722.3		0.344862
ILMN_1683781	0.950052	0.396	ADAMTS15	-0.866737	-5.46877	-0.269163	21265057	ADAMTS15	TGCTCCAAGAGCTGCGGCCGGGGATTTCAGAGGCGCTCACTCAAGTGTGT	NM_139055.1		0.402305
ILMN_1726247	0.950052	0.369	ADAMTS16	-0.918871	-5.42596	-0.192028	21265060	ADAMTS16	TGGTCCCAGGTAGGTGCACTGGTCTCGCGGGAGCGAGGTTGACTAGCTCT	NM_139056.1		0.432974
ILMN_1682989	0.950052	0.248	ADAMTS17	1.18932	-5.16819	0.585463	110611169	ADAMTS17	AACGCCAACACCATCACCTCCCCCCGCCTTGCTGCTCTGACCTACAAATG	NM_139057.2		0.605548
ILMN_1739872	0.950052	0.572	ADAMTS18	0.575219	-5.66469	0.130292	149158721	ADAMTS18	CTGGTCTCAGTGTTCCAAGACCTGTGGACGAGGGGTGAGGAAGCGTGAAC	NM_199355.2		0.242604
ILMN_1770152	0.990775	0.949	ADAMTS18	-0.0652327	-5.81996	-0.0205094	149158721	ADAMTS18	GCTCTGTACATACTACCAGAGCTGCTTGGAAAATTAAAGGCCACTTGTGG	NM_199355.2		0.0227338
ILMN_1656171	0.950052	0.401	ADAMTS19	0.857828	-5.47586	0.167414	73695938	ADAMTS19	GAGTGAACTGCCTTGGAAGATAGTATGTCTCTTGGGAGCAAAGGGCAAAC	NM_133638.2		0.396856
ILMN_1811765	0.950408	0.624	ADAMTS2	0.497182	-5.70422	0.303758	11038658	ADAMTS2	TGAACGAGCAATGCCGCTTTGACTTCGGCCTGGGCTACATGATGTGCACG	NM_021599.1		0.204815
ILMN_1796628	0.99862	0.991	ADAMTS2	0.0119002	-5.82193	0.00673257	110825973	ADAMTS2	TACAACAACCTCACCAACGTGGAGGGCAGGATAGAGCCACCGCCTGGGAA	NM_014244.2		0.00392635
ILMN_1787908	0.95493	0.689	ADAMTS20	0.40649	-5.7431	0.0763977	124430556	ADAMTS20	CAGTGTCATATGCATGCTTGCCCTGCTGATGTGTCATGGCATCAGGAACC	NM_025003.3		0.161781
ILMN_1651717	0.961443	0.781	ADAMTS20	0.281911	-5.78396	0.0544668	124430556	ADAMTS20	GTGGAGGGTACTGTGGAAAGTGTCTTCCTCACATGACTACTGGTCTCCCA	NM_025003.3		0.107349
ILMN_1703803	0.958786	0.765	ADAMTS3	0.302976	-5.77808	0.0580264	21265036	ADAMTS3	GTGCATACATCTCATCCACAGGGGAAGATAAAGATGGTCACACAAACAGT	NM_014243.1		0.116339
ILMN_2092933	0.275464	0.00185	ADAMTS4	3.58041	-1.17681	0.950908	41327755	ADAMTS4	GGCGTGAGCCACCGTGCCTGGCCACGCCCAACTAATTTTTGTATTTTTAG	NM_005099.3		2.73283
ILMN_1681886	0.980477	0.889	ADAMTS5	0.141077	-5.81246	0.0422592	73765553	ADAMTS5	CACTCAGGCACAACGTAAACCTTGATGGCTCATCTTGCTACAATTACGAG	NM_007038.2		0.0510982
ILMN_1767362	0.960387	0.777	ADAMTS6	0.287566	-5.78243	0.12197	64276807	ADAMTS6	GGGAAACTGGTACCCTACACCTGGGAGCAGTATCTGCCACTGGGATAAAG	NM_197941.2		0.109579
ILMN_3251322	0.903835	0.147	ADAMTS7	1.50821	-4.79303	0.336963	133925806	ADAMTS7	TGGTGGAGTACCACGGACAGCCGCAGGTTGAGAGCTATGTGCTGACCATC	NM_014272.3		0.832683
ILMN_2211790	0.913858	0.163	ADAMTS7	1.44719	-4.87037	0.332352	38683826	ADAMTS7	TGGTGGTGTCCAGCGGCGCCTGGTCAAGTGTGTCAACACCCAGACAGGGC	NM_014272.2		0.787812
ILMN_1672403	0.950408	0.625	ADAMTS8	0.496152	-5.7047	0.0877854	73808263	ADAMTS8	CAAGAGAGGCGTGGGGCAGGGAGTCAATGGTGAATGTCAAAGCAGGCTCC	NM_007037.3		0.20412
ILMN_1805543	0.950925	0.639	ADAMTS9	-0.47668	-5.71367	-0.090992	33624895	ADAMTS9	AGCCATGGTCTTTCTGCCCCTCCAAGCTGATGAAGGGAAGCCTTTGCCAA	NM_182920.1		0.194499
ILMN_1727084	0.828127	0.0841	ADAMTSL1	1.81681	-4.36558	0.822884	154275766	ADAMTSL1	CGTGGCCTGAGTTTAGGAGCAAGGGTGGCCAGAGTCCCTTACCCACAGAT	NM_001040272.4		1.0752
ILMN_1706992	0.828127	0.0842	ADAMTSL1	1.81664	-4.36584	0.510041	21327694	ADAMTSL1	GTGCCCTCCGCCTCAGAAATGACAAAAGACTCTTCACTGAGCCCTGTGGC	NM_139264.1		1.07469
ILMN_1722621	0.950052	0.413	ADAMTSL1	-0.835463	-5.49335	-0.362331	154275764	ADAMTSL1	CACCCCTAAGATGCCCATCGCGCAGCCCTGCAACATTTTTGACTGCCCTA	NM_052866.3		0.38405
ILMN_1705250	0.950052	0.464	ADAMTSL1	0.747223	-5.55814	0.315751	154275764	ADAMTSL1	GCAGTGTCTCACTGGTTGTAGCTTTCATGGGTTCTGAACTAAGTGTAATC	NM_052866.3		0.333482
ILMN_1684919	0.950052	0.479	ADAMTSL1	0.721865	-5.5755	0.137293	21327692	ADAMTSL1	TCCCTGCCCAGCAAGAAGCAGTATCGACTCAGCATGGAACGCCTGCAACG	NM_139238.1		0.319664
ILMN_1721495	0.988231	0.933	ADAMTSL2	-0.0845044	-5.81858	-0.0136441	41281449	ADAMTSL2	CTCGGCCCCCGCCCCTGCAGTCAGCGTCAGTGCTCATCTACGTTAATAAA	NM_014694.2		0.0301184
ILMN_1798690	0.950052	0.354	ADAMTSL3	-0.948338	-5.40076	-0.139436	145275197	ADAMTSL3	GTGATTGGGAATGGATGGGGGACAGTGAGGAGGACACACCAGCCCATTAG	NM_207517.2		0.450997
ILMN_1777683	0.950052	0.561	ADAMTSL4	0.591655	-5.65566	0.139951	83281433	ADAMTSL4	TACCCCTACTACACAGCCACCTGTTGCCGCTCTTGCGCACATGTCCTGGA	NM_019032.4		0.251037
ILMN_1762294	0.950052	0.572	ADAMTSL4	0.575178	-5.66471	0.191513	83281434	ADAMTSL4	GGGTAACCACGCCCAGGACACCTCAGCCTTTCCAGCATAGCTCAATAAAC	NM_025008.3		0.242604
ILMN_1687035	0.996621	0.981	ADAMTSL4	-0.0234901	-5.82174	-0.00729668	83281434	ADAMTSL4	CAGCAGAGAGGCCTGTGACATGGGGCCCTGTACTACTGCCTGGTTCCACA	NM_025008.3		0.00833099
ILMN_1793040	0.975606	0.866	ADAMTSL5	0.171359	-5.80793	0.0445454	47106072	ADAMTSL5	GGCACTGTAACGTACCAACGTACCAATTTCCCCTTTTCCCCTGGCTACCA	NM_213604.1		0.0624821
ILMN_1813530	0.897329	0.141	AGT	1.53088	-4.76366	0.610627	73622269	AGT	TCAGCGATGTGTCACCCCCAGTCTCCCACCTTTTCTTCTAATGAGTCGAC	NM_000029.2		0.850781
ILMN_1695446	0.950052	0.311	AMBP	1.03952	-5.31823	0.188243	31541901	AMBP	GCTACCCCAAGAAGAGGAAGGATCAGGGGGTGGGCAACTGGTAACTGAAG	NM_001633.2		0.50724
ILMN_1728055	0.927123	0.191	ASTL	1.35216	-4.9857	0.245494	66392153	ASTL	CTGTCCAGGGAAGCCCAGCTCTGCCAGGGGGCTGTGTACCTAGAAATCAT	NM_001002036.2		0.718967
ILMN_1758542	0.950052	0.378	BMP1	-0.900533	-5.44128	-0.284294	5902812	BMP1	GGCCCCCACCCAGTACCGCATCTCCCTGCAGTTTGACTTCTTTGAGACAG	NM_006131.1		0.422508
ILMN_2295290	0.950052	0.442	BMP1	-0.783905	-5.53202	-0.153118	5902807	BMP1	CCCACCGAGGAGACCCTAAGCCAAGAAGGAGAAGAAAGAGCCTGAAGACC	NM_006128.1		0.354578
ILMN_1800412	0.950052	0.523	BMP1	-0.650182	-5.62151	-0.377181	5902809	BMP1	AGGGAATGTCAGCAGGACCCCATCGCCATCCCTGTGTCTCTACACGCTGT	NM_006129.2		0.281498
ILMN_1789994	0.986639	0.923	BMP1	0.0978786	-5.81741	0.0269024	5902807	BMP1	ACATTGCCCCATCGCACAAGAAACCTGCAGAGGACCCCCACTGGGGGCAT	NM_006128.1		0.0347983
ILMN_1680364	0.950052	0.268	CD109	1.13961	-5.21993	0.557562	115529483	CD109	GGCATTGGCCAGGGATCCTGTGGAACCTCTTCTAGTTCAGGGGTGTGAGC	NM_133493.2		0.571865
ILMN_1749515	0.950052	0.582	CELA3B	0.559245	-5.67324	0.097076	58331212	CELA3B	GCCCAGTCAGCCCCCTTTGCTTACCTTCTGCCCTATATTAGAGCCCCAGG	NM_007352.2		0.235077
ILMN_2357334	0.936659	0.199	CPN2	1.32933	-5.01246	0.436056	122937469	CPN2	CTCTGAAGTCTGCTGAGAGCTTCCCCTGCACAATAAAACTTGGCCTCCAC	NM_001080513.1		0.701147
ILMN_1781013	0.950052	0.285	CPN2	1.09759	-5.26217	0.477788	113415388	CPN2	CACCCCCGCTGCTTCGAGTTGTCCTGCCTTTCTGAACTCAACCAATGTAT	XM_942072.2		0.545155
ILMN_1697370	0.950925	0.643	CST11	0.470498	-5.71645	0.0870724	18644731	CST11	GGCAGTAGAAAACTATGCGAAGGACAGCTTGCAGTGGATCACCGACCAGT	NM_080830.2		0.191789
ILMN_1653748	0.966702	0.812	CST11	-0.240524	-5.7943	-0.0668324	19882248	CST11	TGCCAAAAGCCAGAGACCACGAACTGTGTCCCCCAGGAAAGGGAGCTTCA	NM_130794.1		0.090444
ILMN_1800354	0.955159	0.714	CST3	-0.371582	-5.75602	-0.0710736	19882253	CST3	GCCTTGGCAGGGCACAATGACCTTGTCGAAATCCACCTGTCAGGACGCCT	NM_000099.2		0.146302
ILMN_1697733	0.971729	0.847	CST6	0.195661	-5.80366	0.0400063	113422960	CST6	CAGCAGGAGAAGCTGCGCTGTGACTTTGAGGTCCTTGTGGTTCCCTGGCA	XM_001129442.1		0.0721166
ILMN_1698666	0.977807	0.876	CST6	-0.158115	-5.81002	-0.0378924	20302137	CST6	GGGCAGCAACAGCATCTACTACTTCCGAGACACGCACATCATCAAGGCGC	NM_001323.2		0.0574959
ILMN_1679826	0.910426	0.156	CST7	-1.47187	-4.8394	-0.715804	20302138	CST7	TCACTGACCCCCGCCTCTTCAGCAAGACCACAGCCATGACAAACACCAGG	NM_003650.2		0.806875
ILMN_1765103	0.950052	0.327	CST8	1.00415	-5.35105	0.191184	19882257	CST8	AGCAATGGCAGGTGGGAGGCTCTTCCCAATGTGCTTTCTTCATGCATGCC	NM_005492.2		0.485452
ILMN_1702372	0.959163	0.77	CST9	0.296931	-5.77981	0.0539896	57165420	CST9	CAAACCCCGCCCTACTGTCTCTTCCTGTTTGTTCCCTCGGACCTTCAGCT	NM_001008693.1		0.113509
ILMN_1761797	0.87535	0.115	CSTB	1.64925	-4.60494	0.272487	20357564	CSTB	CTGTGTTTAAGGCCGTGTCATTCAAGAGCCAGGTGGTCGCGGGGACAAAC	NM_000100.2		0.939302
ILMN_1726328	0.983724	0.902	CSTL1	-0.124367	-5.81459	-0.0400033	19882258	CSTL1	CAGCTCTGGAACAATTCCTGTCTGGAGGCCGAGCATGTGGGCAGAAACCT	NM_138283.1		0.0447935
ILMN_1719286	0.950052	0.505	CTSA	0.679333	-5.60335	0.150003	119395728	CTSA	CAAGCAGCCATACTGATGACCACAGCAACCAGCTCCACGGCCTGATGCAG	NM_000308.2		0.296709
ILMN_1696360	0.42194	0.00583	CTSB	3.08245	-2.15615	0.770615	66346647	CTSB	TCCACTGTCCTGCCAAGGTACACCTCAGTACTCCCCTTCCCAACTGAAGT	NM_147780.2		2.23433
ILMN_2359742	0.989586	0.942	CTSB	0.0731452	-5.81944	0.013744	66346646	CTSB	GTGCACTCCAGCCTCGGTGACAGCGCAAGGCTCCGTCTCAATAATTAAAA	NM_001908.3		0.0259491
ILMN_1792885	0.886496	0.132	CTSC	1.57088	-4.71103	0.693612	22538438	CTSC	ACACACCTGCCAACTGCACCTATCTTGACCTGCTGGGCACCTGGGTCTTC	NM_001814.2		0.879426
ILMN_2242463	0.941687	0.207	CTSC	1.30354	-5.04224	0.224265	22538438	CTSC	TCCGCAGAGGAACTGATGAGTGTGCAATTGAGAGCATAGCAGTGGCAGCC	NM_001814.2		0.68403
ILMN_1696347	0.950052	0.5	CTSC	0.687408	-5.59819	0.141022	22538438	CTSC	CAGCCTCTGGGATGGATTACTGGATTGTTAAAAACAGCTGGGGCACCGGC	NM_001814.2		0.30103
ILMN_1689086	0.950052	0.576	CTSC	-0.569023	-5.66803	-0.127071	68509901	CTSC	CCTCTGGCATAAATGGGTTAATACCTAGGTGATGAGTTGATAGGTGCAGG	NM_148170.2		0.239578
ILMN_1674038	0.977807	0.877	CTSD	-0.156744	-5.81023	-0.029717	23110949	CTSD	CCTGTCTGTCTCTCCATCTGTTTGGTGGGGGTAGAGCTGATCCAGAGCAC	NM_001909.3		0.0570004
ILMN_1799887	0.950052	0.234	CTSE	-1.22623	-5.12856	-0.267489	23110950	CTSE	TGCTGGTGCCTCTCTATTGGTAATGTTAAGACTGCTGGGTGGGTTTGGAG	NM_001910.2		0.630784
ILMN_2387224	0.954965	0.69	CTSE	0.404106	-5.74402	0.074483	23110951	CTSE	CAGTTTTACTCAGTCTTTGACCGTGGGAATAACCGTGTGGGACTGGCCCC	NM_148964.1		0.161151
ILMN_1693738	0.974521	0.861	CTSE	0.177177	-5.80696	0.049665	23110950	CTSE	CTGGCCCTTCCGACAAGATTAAGCAGCTGCAAAACGCCATTGGGGCAGCC	NM_001910.2		0.0649968
ILMN_1804955	0.950052	0.233	CTSF	1.23026	-5.12417	0.452817	6042195	CTSF	CTGCTTCCCTGCACCCCATTCCCACCCTGAAGTTCTGCACCTGCACCTTT	NM_003793.2		0.632644
ILMN_1680424	0.828127	0.083	CTSG	-1.82426	-4.35456	-1.29693	23110953	CTSG	CACAGGCCAGCTCCACAGTGTTGCCAGAGCCTTAATAAACGTCCACAGAG	NM_001911.2		1.08092
ILMN_1752451	0.764921	0.0567	CTSH	-2.0215	-4.05193	-0.579909	148536857	CTSH	TGGGCCTGGGTGGAAATCCTGCCCTGGAGGAAGTTGTGGGGAGATCCACT	NM_004390.3		1.24642
ILMN_2390853	0.967112	0.814	CTSH	0.237928	-5.79489	0.0685236	23110954	CTSH	CAAAGATCACCAGCCATGTGCCTTAGTGTCCTTCTTAACAGACTCAAACC	NM_004390.2		0.0893756
ILMN_1758895	0.950408	0.626	CTSK	-0.49544	-5.70504	-0.262326	23110958	CTSK	AGGCTAAGAGATGTGACTACAGCCTGCCCCTGACTGTGTTGTCCCAGGGC	NM_000396.2		0.203426
ILMN_1769633	0.971729	0.848	CTSO	-0.193784	-5.80401	-0.0511389	38327639	CTSO	CGCCAGTCAGAACCAATCCGAAAAGAATGTGTGTTGACTCAGGTTTGGAG	NM_001334.2		0.0716041
ILMN_1743032	0.734807	0.0447	CTSS	-2.14089	-3.85926	-0.779173	23110961	CTSS	GACTGTCATGTAAGAGGTGCTCTCCTGGCACCCAGAGAAAAGGAGCATCC	NM_004079.3		1.34969
ILMN_1794364	0.734807	0.0458	CTSW	-2.12805	-3.88029	-0.878439	119395730	CTSW	CTCCTTGCCAGCCCCACCCCCAGGTTTTTGCCCATCCTCCCAATCTCAAT	NM_001335.3		1.33913
ILMN_1666269	0.956015	0.721	CTSZ	0.361764	-5.75945	0.056404	22538441	CTSZ	GACACTTGCACAGCATGGCTCTGCCTCACAATGATGCAGTCAGCCACCTG	NM_001336.2		0.142065
ILMN_1749892	0.834527	0.0891	EGLN1	1.78599	-4.41083	0.839755	13489072	EGLN1	CATGAGCAGCATGGACGACCTGATACGCCACTGTAACGGGAAGCTGGGCA	NM_022051.1		1.05012
ILMN_2354391	0.378006	0.0044	EGLN2	-3.20578	-1.91656	-0.630695	18141577	EGLN2	TGCCACTGCTTGGGCAGAGTAAAAGGTGCCAGGAGGAGCATGGGTGTGGA	NM_080732.1		2.35655
ILMN_1768773	0.942497	0.209	EGLN2	-1.29796	-5.04861	-0.452237	18141576	EGLN2	GAGGAGGCATTGTCACTTCCCACCAGGATGCAGGACTTGGGGTTGAGGTG	NM_053046.2		0.679854
ILMN_1815686	0.950052	0.372	EGLN2	0.912434	-5.43137	0.166288	8922129	EGLN2	ATTCACTTTGAGAGCCCGAGGGGTGGGAGGGAGTGATGCAGGCAGACGCT	NM_017555.1		0.429457
ILMN_1667626	0.722846	0.0421	EGLN3	2.17015	-3.81102	0.664959	130509310	EGLN3	GCAACATACTCTCAGCACCTAAAATAGTGCCGGGAACATAGTAAGGGCTC	NM_022073.3		1.37572
ILMN_1706635	0.950052	0.428	ELANE	-0.808523	-5.51384	-0.428359	58530849	ELANE	GTCACCTCAGCTGCCCACACCCACACTCTCCAGCATCTGGCACAATAAAC	NM_001972.2		0.368556
ILMN_1670708	0.950052	0.446	F10	-0.777924	-5.53636	-0.504568	89142731	F10	GCACGTCACCCGCTTCAAGGACACCTACTTCGTGACAGGCATCGTCAGCT	NM_000504.3		0.350665
ILMN_1671766	0.950052	0.25	F12	-1.18497	-5.1728	-0.395933	145275212	F12	CTCCTTGGTGATTCCGCAGTGAGAGAGTGGCTGGGGCATGGAAGGCAAGA	NM_000505.3		0.60206
ILMN_1717163	0.950052	0.467	F13A1	0.741644	-5.56201	0.349957	119395708	F13A1	GCTGGCGGATCTAGTGACCAGATATATAGAAGGACTGCAGCCACTGATTC	NM_000129.3		0.330683
ILMN_1735489	0.950925	0.644	F13B	0.46951	-5.71689	0.0829159	110611236	F13B	CGTTGCGAACAAGGAAAATGGTCATCCCCACCTGTTTGCTTGGAACCATG	NM_001994.2		0.191114
ILMN_3249291	0.955042	0.713	F2	0.373033	-5.7555	0.0687258	169808403	F2	CAAGCCTGATGAAGGGAAACGAGGGGATGCCTGTGAAGGTGACAGTGGGG	NM_000506.3		0.14691
ILMN_1740559	0.942548	0.21	F7	1.29496	-5.05203	0.354957	116805320	F7	GCCGGGCTGCACAGACTATTCCCCACCTGCTTCCCAGCTTCACAATAAAC	NM_000131.3		0.677781
ILMN_2358265	0.950052	0.542	F7	0.620527	-5.6392	0.150022	116805320	F7	ACCAGCAACCCACCTCGGGGGCACTCAGGCATCATCTACTTCAGAGCAGA	NM_000131.3		0.266001
ILMN_2267025	0.950052	0.549	F7	0.609197	-5.64575	0.105322	116805320	F7	AAGGCCTCAGGAGGAGAAACACGGGACATGCCGTGGAAGCCGGGGCCTCA	NM_000131.3		0.260428
ILMN_1810651	0.950052	0.289	F9	1.08955	-5.27009	0.18759	10518507	F9	TCAGCAGTGTTCAGAGCCAAGCAAGAAGTTGAAGTTGCCTAGACCAGAGG	NM_000133.2		0.539102
ILMN_1812091	0.975727	0.866	FAM20A	-0.170407	-5.80808	-0.0871043	42476034	FAM20A	GCTGGCAGAGTCCAGTTTCAGAAAATACGCCTGGAGCCAGAGCAGTCGAC	NM_017565.2		0.0624821
ILMN_1811373	0.973048	0.853	FAM20B	0.187185	-5.80521	0.0531191	41281529	FAM20B	CCCTTCAATTCCTCAAGTCTGGGTGGTGACAAGGTAGGGGCTAGGTACTG	NM_014864.2		0.069051
ILMN_1712684	0.931252	0.194	FAM20C	1.3422	-4.99742	0.717664	116174741	FAM20C	CTCAAGGCCAAGCTCACCCCTCAAGTGCTCTCACACTCGGGACCTAATTC	NM_020223.2		0.712198
ILMN_1703009	0.950052	0.339	FAM20C	0.980371	-5.37254	0.445193	116174741	FAM20C	ATCAACCGGTACGAGCTGTACTCCAGACACAACCCGGCCATCGAGGCCCT	NM_020223.2		0.4698
ILMN_1683165	0.950052	0.457	FAM20C	0.758357	-5.55034	0.295718	116174741	FAM20C	GGAGGCGGCCGTGGACTCCTATCCCAACTGGCTCAAGTTCCACATTGGTA	NM_020223.2		0.340084
ILMN_1737041	0.950052	0.358	HABP2	-0.941452	-5.40671	-0.367737	20302151	HABP2	CCCTGACCCTTTCTGCGAATGTAACGAGCAAGCAGTCAGCACAGCCTGGG	NM_004132.2		0.446117
ILMN_2092850	0.950052	0.554	HPSE	0.602084	-5.6498	0.112272	94721346	HPSE	GGGCACCAAGGTGTTAATGGCAAGCGTGCAAGGTTCAAAGAGAAGGAAGC	NM_006665.3		0.25649
ILMN_1732035	0.950052	0.593	HPSE2	0.543522	-5.68142	0.0989704	90403585	HPSE2	TCTGTTTTCAGACATCCTAGCAACCAGCCCCTGCTGCCCCATCCTGCTGG	NM_021828.3		0.226945
ILMN_2193936	0.950052	0.544	HRG	0.616821	-5.64135	0.283076	13518024	HRG	GGCCTGAGAAGAGAGATCAAATGGAAAGGAGAGGAAAGAACTCAGTGCTG	NM_000412.2		0.264401
ILMN_1807339	0.950052	0.607	HRG	0.522254	-5.69213	0.267051	13518024	HRG	TCCTGAGGCCAATTTTCCCAGCTTCCCATTGCCGCACCACAAACATCCTC	NM_000412.2		0.216811
ILMN_1676563	0.950052	0.302	HTRA1	1.05921	-5.29952	0.528983	73747816	HTRA1	ACAATGCGTAGATAGAAGAAGCCCCACGGGAGCCAGGATGGGACTGGTCG	NM_002775.3		0.519993
ILMN_1812669	0.950052	0.598	HTRA3	0.535371	-5.68557	0.0916272	24475740	HTRA3	GGAGCACGTGGAAAGTTGGCTGCTGCCTGGGGAAGTTTTTCCTCCCCAAG	NM_053044.2		0.223299
ILMN_1675584	0.950052	0.431	HTRA4	0.803516	-5.51758	0.139405	30410026	HTRA4	GTCAGCACCAAACAGCGAGGGGGCAAAGAACTGGGGATGAAGGATTCAGA	NM_153692.2		0.365523
ILMN_2099277	0.950052	0.558	HTRA4	-0.596221	-5.65311	-0.179496	30410026	HTRA4	CCCTTTCCATGGCTGTTCTTCGGGGAAAAGATAATTTGCTCCTGACAGTC	NM_153692.2		0.253366
ILMN_1693230	0.831261	0.086	HYAL1	1.80499	-4.38299	1.12751	24497563	HYAL1	GACAAAGAACACTCCCTGAGCACAAGACACGAAAGAACCCGGTCTCCAGT	NM_153281.1		1.0655
ILMN_2314417	0.937141	0.202	HYAL1	1.3186	-5.02491	0.352833	24497567	HYAL1	CCACTGTCACAGGCATATTCCCTGCACACACATGCATACTTACAGACTGG	NM_153283.1		0.694649
ILMN_1712620	0.995624	0.978	HYAL1	0.0282726	-5.82162	0.0127063	24497560	HYAL1	CAGCCCTGAGCAGTGGGGGAATCGGAGACTTTGCAACCTGTTCTCAGCTC	NM_007312.3		0.00966115
ILMN_1739813	0.998101	0.988	HYAL1	0.0150898	-5.82189	0.00239094	24497565	HYAL1	GGTAACCAGCCCTGCACGACCCCTGAATCTGCTGAGAGGCACCAGTCCAG	NM_153282.1		0.00524306
ILMN_1713840	0.942408	0.209	HYAL2	1.29812	-5.04844	0.514	15022800	HYAL2	TCACCCCAGGTAAGGAGGGAGGCCACCGACCTACTGGGCCGACGGACTCC	NM_003773.2		0.679854
ILMN_1668283	0.950052	0.319	HYAL2	1.02178	-5.33481	0.5845	15022800	HYAL2	CATTGACCACCTGCAGACACACTTCCGCTGCCAGTGCTACTTGGGCTGGA	NM_003773.2		0.496209
ILMN_1665916	0.969408	0.829	HYAL2	0.218491	-5.79913	0.115645	34304376	HYAL2	TGGGCTGGGCCCGGGATGGCGGTGGCCCTGGCGCCGGTCCCGGTGGCGCC	NM_033158.2		0.0814455
ILMN_1667432	0.660053	0.0304	HYAL3	-2.32896	-3.54285	-0.828601	15208650	HYAL3	GGCAAGGAAGCAGTTCCAGGGAGAGTCAGGTTCCAGCTAGTTAGGGCTGC	NM_003549.2		1.51713
ILMN_1704598	0.925383	0.187	HYAL4	1.36689	-4.96824	0.250907	6912427	HYAL4	AGACGGCTGATGGCTGCTCTGGGGTTTCCCCTTCTCCTGGTTCACTAATG	NM_012269.1		0.728158
ILMN_1755251	0.955042	0.708	ITIH1	-0.3801	-5.75297	-0.0706556	4504780	ITIH1	CATGGGGCCGAGGTGTCCTGCTGGTTCATTCACAACAATGGGGCTGGACT	NM_002215.1		0.149967
ILMN_1808494	0.99214	0.956	ITIH2	0.0556432	-5.82052	0.0164161	70778917	ITIH2	AGGAAAGGACCCTGAGAAGCCAGAGGCCAGCATGGAAGTGAAGGGGCAGA	NM_002216.2		0.0195421
ILMN_1757461	0.959163	0.77	ITIH3	0.296845	-5.77984	0.0529637	133925808	ITIH3	CTGGAACATGGGCACAGAGAGGGGCCTGTGGGAGGGGCTGGGAAAATAAA	NM_002217.3		0.113509
ILMN_1718525	0.950052	0.386	ITIH4	0.885843	-5.45335	0.462094	40288189	ITIH4	GTGGCCAAATCCTAGGGCCTCAACCTCGCATCCTGAACCTTAGCATCGTG	NM_002218.3		0.413413
ILMN_1731862	0.212707	0.000992	ITIH5	3.84697	-0.64409	1.69222	153945779	ITIH5	GGGACACCAACCACATCGAGCGTCTCTGGAGCTACCTCACCACAAAGGAG	NM_030569.4		3.00349
ILMN_2335557	0.615133	0.0213	ITIH5	2.49693	-3.24845	0.655952	49355768	ITIH5	AGGAGGACGCAGGCTCGCAGCTCATCGGGTTCTACGATGAAATCAGGACC	NM_030569.3		1.67162
ILMN_2235707	0.763898	0.0564	ITIH5	-2.02375	-4.04837	-0.467239	49355777	ITIH5	GATTGCACCATTGCACTCCAGCCTGGGTGACAGAGTGAACCTCCGTCTCA	NM_001001851.1		1.24872
ILMN_1793695	0.912122	0.161	ITIH5	-1.45667	-4.85852	-0.506818	49355777	ITIH5	CAGATGAGCTAGACAGTTGTCCTCTATCTCCATGGGTCCCGCATCCCAAG	NM_001001851.1		0.793174
ILMN_1663213	0.967405	0.816	ITIH5	0.236067	-5.79531	0.116094	153945710	ITIH5	GACGTGTTCGCTTTGCGTTTGCCTTCTGCGTGATTGTAAGTTTCCCGAGG	NM_032817.3		0.0883098
ILMN_1684755	0.745525	0.05	KAZALD1	-2.08456	-3.951	-0.696342	34147508	KAZALD1	CCTAAGCCCCAGTTGCACCTACTAACTGCAGTCCCTTTTGCTGTCTGCCG	NM_030929.3		1.30103
ILMN_1753729	0.950052	0.479	KNG1	-0.722027	-5.57539	-0.206879	38455404	KNG1	GCAGAATCTTCACTCCAGGCACATAGCCCCAACCACCTCTGCCAGCAACC	NM_000893.2		0.319664
ILMN_1748178	0.615133	0.0213	KY	2.49559	-3.25084	0.743666	148806931	KY	GCCACAGGAGCTGTGATCTTTGTGTTCTGAAGGCTTCACTCAGGTGTGGC	NM_178554.4		1.67162
ILMN_1664294	0.953066	0.67	LEPRE1	0.432389	-5.73277	0.237591	21361917	LEPRE1	TACATCTGCCACTCAGCCGAGGGGACCCTGCTCACAGCCTTCTACATGGT	NM_022356.2		0.173925
ILMN_1657373	0.956262	0.737	LEPREL1	-0.341134	-5.76636	-0.0735592	27764881	LEPREL1	CCATGGCCAGGTTGCCTAGGAGTGGGGTCCACTGATGAAAAGAGGTGTTT	NM_018192.2		0.132533
ILMN_1705682	0.950052	0.323	LEPREL2	-1.01361	-5.34237	-0.350846	28466982	LEPREL2	CATCTTGGGGACCTACAAGGGCCTGGACTCAGAGGACAGTGCACAGGCTA	NM_014262.2		0.490797
ILMN_1695880	0.950052	0.455	LOX	0.762177	-5.54763	0.426011	21264603	LOX	CGCTGTGACATTCGCTACACAGGACATCATGCGTATGCCTCAGGCTGCAC	NM_002317.3		0.341989
ILMN_1734950	0.938058	0.204	LOXL1	-1.31338	-5.03093	-0.697848	67782345	LOXL1	CCAGTGGATCGACATAACCGACGTGCAGCCTGGGAACTACATCCTCAAGG	NM_005576.2		0.69037
ILMN_1708363	0.950052	0.489	LOXL1	-0.705264	-5.58656	-0.386573	67782345	LOXL1	CACAGTCTGTACAGCGAGGGCACCCCCGGCTTCGAGCAGGCCTACCCTGA	NM_005576.2		0.310691
ILMN_1656802	0.855076	0.103	LOXL2	1.70909	-4.52138	0.460204	67782347	LOXL2	TGGTTTTCTCCGGTGGACATGGGTCCTCAGATCCCCTCCAGCCCAGTGTG	NM_002318.2		0.987163
ILMN_1733515	0.963406	0.79	LOXL3	-0.269958	-5.78711	-0.111806	22095373	LOXL3	ATCTAAGTGCCACTGCCCTCTGCAAACCACCACTGGCCCCTAATGGCAGG	NM_032603.2		0.102373
ILMN_2179083	0.156719	0.000501	LOXL4	-4.13801	-0.061	-0.802278	67782348	LOXL4	AGGCCACCATTCCTGCTTGATGGGGCTCTGATTTGCTCTTGCTCAAGTGG	NM_032211.6		3.30016
ILMN_2240866	0.342738	0.00344	MASP1	-3.31301	-1.70641	-0.759288	73623025	MASP1	CCATGTGGCCTCAGGCTGACCAGATCAAAGTGGTTTCTAATCCATTCTAC	NM_001031849.1		2.46344
ILMN_1809537	0.950052	0.445	MASP1	0.778374	-5.53604	0.343026	73623024	MASP1	CTCCATCAGAGCAAGGCAGCCAGAGAAGCCCCTGAGAGGGAATGATTGGG	NM_139125.2		0.35164
ILMN_1801996	0.950052	0.47	MASP1	-0.735553	-5.5662	-0.19583	73623025	MASP1	CCACAACACCCCCGTGCCCCTTTCCATGTGGATTAGAATGGGTGCTGAAC	NM_001031849.1		0.327902
ILMN_1724300	0.95755	0.758	MASP1	-0.312503	-5.77528	-0.124804	73623023	MASP1	TCCCAGGCTGTGGTGGCTCCTGTGGGAACTACCTAGATGAAGAGAGTATC	NM_001879.4		0.120331
ILMN_1785892	0.959937	0.774	MASP1	-0.291266	-5.7814	-0.125569	73623024	MASP1	AGTGCCCAGAGCTACAGCCTCCTGTCCATGGGAAAATCGAGCCCTCCCAA	NM_139125.2		0.111259
ILMN_1709408	0.950925	0.644	MASP2	0.469515	-5.71689	0.161165	21264362	MASP2	GCCTGTGAAGACCTTGGCAGCGACGTGGCTCGAGAAGCATTCATCATTAC	NM_006610.2		0.191114
ILMN_1735260	0.97376	0.857	MASP2	-0.182935	-5.80596	-0.0655845	21264362	MASP2	AACGAGAAGCCGTTCACGGGGTTCGAGGCCTTCTATGCAGCCGAGGACAT	NM_006610.2		0.0670192
ILMN_1727723	0.999529	0.996	MASP2	-0.00483928	-5.82199	-0.00086103	21264360	MASP2	GCTGAGATGGCTGTGCCCCAACTCCCATTCACCCACCATGGACCCAATAA	NM_139208.1		0.00174066
ILMN_1659984	0.950052	0.61	MEP1A	0.518611	-5.69392	0.0884023	153070261	MEP1A	GTGCTGGCCCCAGTGCCTAGATGCATGGCTGGCACATTGTTGGCACTCAA	NM_005588.2		0.21467
ILMN_1734694	0.999672	0.998	MEP1B	0.00257602	-5.822	0.00056752	153070263	MEP1B	GGTGGTACATGGGAGAAAGGTGTGAAAAGAGAGGCTCCACCCGAGACACC	NM_005925.2		0.000869459
ILMN_1741847	0.950052	0.36	MMP10	0.937551	-5.41007	0.155229	4505204	MMP10	CAGTGGATCATCACAGTTTGAGTTTGACCCCAATGCCAGGATGGTGACAC	NM_002425.1		0.443697
ILMN_1655915	0.613529	0.0205	MMP11	-2.51506	-3.21607	-1.309	58331147	MMP11	CAGGTCTTGGTAGGTGCCTGCATCTGTCTGCCTTCTGGCTGACAATCCTG	NM_005940.3		1.68825
ILMN_2073758	0.950052	0.224	MMP12	-1.2555	-5.0964	-0.386772	73858571	MMP12	TCTATTTGAAGCATGCTCTGTAAGTTGCTTCCTAACATCCTTGGACTGAG	NM_002426.2		0.649752
ILMN_1768035	0.950052	0.536	MMP12	0.629431	-5.63397	0.104628	73858571	MMP12	TGGCCAACCTTGCCATCTGGCATTGAAGCTGCTTATGAAATTGAAGCCAG	NM_002426.2		0.270835
ILMN_1663873	0.950052	0.371	MMP13	0.914087	-5.42999	0.161738	13027796	MMP13	GCACTGAGGATATTCAGATGTATGTGCCCTTCTTCACACAGACACTAACG	NM_002427.2		0.430626
ILMN_1774739	0.950052	0.489	MMP14	0.704232	-5.58724	0.126762	13027797	MMP14	TCTCGCTCCCCCACCCAGCCCACCCATTGAAGTCTCCTTGGGCCACCAAA	NM_004995.2		0.310691
ILMN_1718646	0.950052	0.223	MMP15	-1.2569	-5.09485	-0.788318	45594662	MMP15	GATAGGCCAGCCGCGCATCAGACTGTGAACCCCACGAAGGAGCCCATTGT	NM_002428.2		0.651695
ILMN_1791796	0.877944	0.119	MMP16	1.62918	-4.63248	0.655755	13027799	MMP16	AAATGACAGGCCAAAACCTCCTCGGCCTCCAACCGGCAGACCCTCCTATC	NM_022564.1		0.924453
ILMN_1718331	0.886496	0.133	MMP16	1.56435	-4.7197	0.33588	149999366	MMP16	GGTGGGAGATTTGGAATACACATGCAGGACGTTAGACTGTTGGGACAGCC	NM_005941.4		0.876148
ILMN_1702361	0.950052	0.262	MMP16	1.15373	-5.20543	0.248983	149999364	MMP16	GGCAGTCAGTGCCTGTGCTCTCAAGACAAACTGAAAAGCACAAGACCTAT	NM_022564.3		0.581699
ILMN_1801146	0.950052	0.607	MMP17	0.522829	-5.69184	0.0985666	112382269	MMP17	TGGAGTGGCTAAGCAGGTTCGGTTACCTGCCCCCGGCTGACCCCACAACA	NM_016155.4		0.216811
ILMN_1711062	0.107312	0.000195	MMP19	4.54051	0.74115	1.81143	75905804	MMP19	GCTCCCCCAAGGCTCCCAGAAATCTCAGGTCAGAGGCACGGACAGCCTCT	NM_002429.4		3.70997
ILMN_1782953	0.107312	0.000213	MMP19	4.50308	0.66696	2.25132	75905805	MMP19	GCACTGCTCCCCCAAGGCTCCCAGAAATCTCAGGTCAGAGGCACGGACAG	NM_001032360.1		3.67162
ILMN_1762106	0.950052	0.306	MMP2	-1.04929	-5.30898	-0.619018	75905807	MMP2	GTTTTAGCAGAGCCTAGACAAGGGCCACAGACCCAGCCAGAAGCGGAAAC	NM_004530.2		0.514279
ILMN_1803714	0.107312	0.000195	MMP20	4.54035	0.74083	1.10134	45359864	MMP20	GCTGTCTACCTCAGGGAGCCACAGAAGACCCTTTTCTTTGTGGGAGATGA	NM_004771.3		3.70997
ILMN_2178116	0.955042	0.698	MMP20	0.393964	-5.74786	0.0739561	45359864	MMP20	GGATCTTAAGGACTAAAGCAGAATGTAGGAGAGGGATTCTTCCAAAGGCC	NM_004771.3		0.156145
ILMN_2160015	0.972053	0.851	MMP21	0.190522	-5.80461	0.0364418	22218340	MMP21	CTGGAAGGTAGTTAATGACAAGGACAAACAACAGAATTCCTGGCTTCCTG	NM_147191.1		0.0700704
ILMN_1687950	0.991274	0.952	MMP21	-0.0609708	-5.82022	-0.0156178	22218340	MMP21	GGGGACCCTATCCAAATCCTCACTGGCTGGCCTGGAATCCCAACACACAA	NM_147191.1		0.0213631
ILMN_1778333	0.584047	0.0172	MMP24	2.59474	-3.0725	1.35779	73620939	MMP24	CCTGGTCCCTGTCCACTCCTCAGGTTGGTGCTCTCACTTCTTGAAAGCTC	NM_006690.3		1.76447
ILMN_1717207	0.950052	0.574	MMP25	0.570762	-5.6671	0.157282	73620940	MMP25	GCGAGGGGTTGCCCCAGTTGCTCATACAAACAGATCAGCATGAGGACAGA	NM_022468.4		0.241088
ILMN_1699607	0.950052	0.611	MMP25	0.516679	-5.69487	0.0991946	73620940	MMP25	AGTCTCCTCAGGGTCTGAGACCCCGGCGCTGCCACCGGAACCCGCCTTCA	NM_022468.4		0.213959
ILMN_1679694	0.970225	0.838	MMP27	0.207372	-5.8014	0.0373539	73808267	MMP27	GGGCATTTGGTGCTGGAGGTTTGATGAAATGACCCAAACCATGGACAAAG	NM_022122.2		0.076756
ILMN_1752952	0.931547	0.195	MMP28	1.33895	-5.00123	0.687454	73808269	MMP28	GTACGGATACCTCAATGAACAGGTCCCCAAAGCTCCCACCTCCACTCGAT	NM_024302.3		0.709965
ILMN_1791508	0.936659	0.199	MMP28	1.32934	-5.01245	0.245666	73808269	MMP28	AACGGTGTCATATTTAGTCAGAGGCCCCACCCCCAGGAAGCATGGATGGG	NM_024302.3		0.701147
ILMN_2399016	0.97785	0.877	MMP28	-0.156208	-5.81031	-0.104766	73808270	MMP28	CGGCCTGGGCTGAGAGGATCAGTGACTTGTTTGCTAGACACCGGACCAAA	NM_001032278.1		0.0570004
ILMN_1784459	0.950195	0.62	MMP3	0.503059	-5.70144	0.0856	73808272	MMP3	CCTTGTCACATAGAGTGATCTTTCCCAAGAGAAGGGGAAGCACTCGTGTG	NM_002422.3		0.207608
ILMN_2192072	0.359087	0.00383	MMP7	-3.26658	-1.79759	-1.65884	75709180	MMP7	GCAACTCATGAACTTGGCCATTCTTTGGGTATGGGACATTCCTCTGATCC	NM_002423.3		2.4168
ILMN_1685403	0.495255	0.01	MMP7	-2.84194	-2.6152	-1.46829	75709180	MMP7	GCTCACTTCGATGAGGATGAACGCTGGACGGATGGTAGCAGTCTAGGGAT	NM_002423.3		2
ILMN_1736026	0.950052	0.591	MMP8	0.545841	-5.68023	0.103138	4505220	MMP8	GAAGTTCTAACCCCAGGTACCCATGAATGTGAGCTTACCAGGGTCTTTGC	NM_002424.1		0.228413
ILMN_1796316	0.980477	0.891	MMP9	0.138612	-5.81279	0.107686	74272286	MMP9	GCTTCTACTGGCGCGTGAGTTCCCGGAGTGAGTTGAACCAGGTGGACCAA	NM_004994.2		0.0501223
ILMN_1728779	0.668611	0.0317	NGLY1	-2.30864	-3.57773	-0.395669	21314689	NGLY1	GGAAGCAGAATTAAGCAGAGGAGATGGTGATGTCGCTTGGCAACACACCC	NM_018297.2		1.49894
ILMN_1653834	0.907482	0.151	OGFOD1	1.4909	-4.81523	0.609617	94536835	OGFOD1	CGGACGCTGTTACGGAAGAAACCTTGAAAAAGCAGGTGGCTGAGGCCTGG	NM_018233.3		0.821023
ILMN_1772690	0.950052	0.358	OGFOD1	0.941052	-5.40706	0.161325	94536835	OGFOD1	GTTGTCCAGCCATCACCATCATCCATCTCCAGAAGTTTTCCATCTTCCCA	NM_018233.3		0.446117
ILMN_1677953	0.996621	0.983	OGFOD1	0.0213528	-5.82178	0.0114321	94536835	OGFOD1	GACACAGTGAGTCATCACATTTCCTCCCACTGCCTGTGGCCTTGTTCCAC	NM_018233.3		0.00744648
ILMN_1704019	0.966989	0.814	OGFOD2	0.238451	-5.79477	0.0434217	13375845	OGFOD2	GGCTCCTGGATGAGGGGGCCAGAGAGGAGTGAATAACTTCCCAGACACTT	NM_024623.1		0.0893756
ILMN_1747442	0.449195	0.00713	P4HA1	2.99378	-2.32676	0.715505	63252887	P4HA1	CACCATTTCAAACCCAATAACAGGAGACTTGGAGACGGTACATTACAGAA	NM_001017962.1		2.14691
ILMN_1693334	0.950052	0.551	P4HA1	0.606579	-5.64724	0.176947	63252885	P4HA1	CCTGCATAACAACACTGGGCCTTCTTAACTAAAATGCTCACCACTTAGCC	NM_000917.2		0.258848
ILMN_2280135	0.584775	0.0173	P4HA2	2.5924	-3.07675	0.943573	63252892	P4HA2	GCTGACCGGGCGACGCCGCGGGAGGTTCTGGAAACGCCGGGAGCTGCGAG	NM_001017974.1		1.76195
ILMN_2381697	0.757924	0.0544	P4HA2	2.04215	-4.01909	1.05547	63252892	P4HA2	TTCCATTCAGCCTGTGCCATCCCTGGCCCCAAGGCTAGGATCAAAGTGGC	NM_001017974.1		1.2644
ILMN_1795778	0.950052	0.373	P4HA2	0.910474	-5.43301	0.457599	63252890	P4HA2	CTGCCCTGTGCTTGTGGGCTGCAAGTGGGTCTCCAATAAGTGGTTCCATG	NM_001017973.1		0.428291
ILMN_1690121	0.955042	0.698	P4HA3	0.394261	-5.74775	0.0694581	54792078	P4HA3	ACGGAAGTCAGAGTAGGATGCACAGTACAAAGGAGGGGGGAGTGGAGGCC	NM_182904.3		0.156145
ILMN_3300313	0.950052	0.33	P4HTM	0.997981	-5.35667	0.52145	64085082	P4HTM	TCGCCAGTTGCCCAAGATCAGGGGTCCGGCTGTCCTTCTGTCCTGCTGCA	NM_177938.2		0.481486
ILMN_1672122	0.950052	0.39	P4HTM	-0.879147	-5.45879	-0.196436	64085082	P4HTM	CTCCATCTGCCCCGTCAAATAAAAAACCACAAGGTTCGAGCCGCCGGGCC	NM_177938.2		0.408935
ILMN_2372136	0.950052	0.574	P4HTM	0.571299	-5.66681	0.0888417	64085082	P4HTM	TTGCCCCACCCCGCCAGCCGCGATACGGCGCAGTTCCTATATTCATGTTA	NM_177938.2		0.241088
ILMN_1658356	0.965102	0.803	PAMR1	0.252711	-5.79142	0.186968	50659097	PAMR1	CCAGGGCAGCAGAGCTGGGATGTGGTGCATGCCTTTGTGTACATGGCCAC	NM_015430.2		0.0952845
ILMN_1788410	0.969877	0.834	PAMR1	-0.212545	-5.80036	-0.0606141	50659097	PAMR1	TCTGGAGGCTGGGAAGTCCAAGATCAAGGCGTCAGAAGATTCATTGTCTG	NM_015430.2		0.0788339
ILMN_1721770	0.746542	0.0506	PAPPA	-2.07897	-3.96002	-0.62237	38045914	PAPPA	CACAATTCCAATCCTTTTTCTGTACCTCACGCGCATAAATTTGCTGCTCC	NM_002581.3		1.29585
ILMN_1708529	0.317219	0.00268	PAPPA2	-3.42118	-1.493	-1.28132	116174737	PAPPA2	AAGGAGACAGTGCCATCCATGGAAACGGGAGACCTCTGTGCCGACACCGC	NM_020318.2		2.57187
ILMN_1792002	0.951441	0.655	PAPPA2	-0.454244	-5.72358	-0.179048	116174737	PAPPA2	GGAGACTGCTGCTCTTCCACACTCTCCTCCAAGAAGGTCATTCCATTTGC	NM_020318.2		0.183759
ILMN_1767934	0.818921	0.0767	PCSK5	-1.86551	-4.29298	-0.421672	20336245	PCSK5	ATGGGAGCCATTTGCAAGGATGCAACGGAAGAGTCCTGGGCGGAAGGAGG	NM_006200.2		1.1152
ILMN_1676595	0.670534	0.0321	PCSK6	2.30182	-3.58942	0.69198	20336181	PCSK6	TCGCCTTGGCTCTAGAAGCAAACAGCCAGTTAACCTGGAGGGACGTCCAG	NM_138320.1		1.49349
ILMN_1676384	0.950052	0.256	PCSK6	1.16882	-5.18977	0.71493	20336187	PCSK6	ATGAGCGAAAAATCGTCACCACGGATCTGCGTCAGCGCTGTACCGATGGC	NM_138323.1		0.59176
ILMN_2292592	0.950052	0.349	PCSK6	0.958806	-5.39163	0.451622	61636061	PCSK6	CACAGTGACATTACGGAAGAACCCTCAGGTCACAAGAGTCTGGGGTCTCC	NM_138322.2		0.457175
ILMN_1710070	0.956072	0.725	PCSK6	0.356388	-5.76129	0.210481	20336181	PCSK6	GCTCTAGAAGCAAACAGCCAGTTAACCTGGAGGGACGTCCAGCACCTGCT	NM_138320.1		0.139662
ILMN_1768577	0.993306	0.964	PCSK6	0.0455183	-5.82101	0.0165174	27894284	PCSK6	CCACACTCTCGATTCTGTTCCATTGGTCTGTATATCTATCTTGGAGTCAG	NM_138325.2		0.015923
ILMN_1738742	0.811276	0.0742	PLAT	1.88266	-4.2671	0.289922	14702165	PLAT	CATGCCACCCTGTTTTCAGCTAAAGCCCAACCTCCTGACCTGTCACCGTG	NM_000930.2		1.1296
ILMN_1656057	0.737183	0.0467	PLAU	-2.11849	-3.89591	-1.24668	53729348	PLAU	GTGGTCTTTCTGGAGAGGTTATAGGTCACTCCTGGGGCCTCTTGGGTCCC	NM_002658.2		1.33068
ILMN_1714446	0.994624	0.972	PLG	-0.0349066	-5.82142	-0.0194405	4505880	PLG	TGGAAGAGTCCAATCCACCGAACTCTGTGCTGGGCATTTGGCCGGAGGCA	NM_000301.1		0.0123337
ILMN_1684391	0.960712	0.779	PLOD1	-0.284123	-5.78337	-0.0524746	32307143	PLOD1	CCTGTCCTGGATGCCTCTGAAGAGAGGGACAGACCGTCAGAAACTGGAGA	NM_000302.2		0.108463
ILMN_2410924	0.920218	0.171	PLOD2	-1.41977	-4.90429	-0.379922	62739165	PLOD2	GGATGAATGACTGGCATGAACACGTCTTTGAAGTTGTGGCTGAGAAGATG	NM_000935.2		0.767004
ILMN_1799139	0.950052	0.31	PLOD2	-1.04181	-5.31607	-0.28547	62739164	PLOD2	GGGAAAAAGACTCCCCTACTCCGGAAACATTCCAAATGCTCAGCCCCCCA	NM_182943.2		0.508638
ILMN_1771599	0.950052	0.615	PLOD2	-0.510409	-5.69791	-0.184939	62739165	PLOD2	ACAAAGTTGTTGAGCCTTGCTTCTTCCGTTTTGCCCTTTGTCTCGCTCCT	NM_000935.2		0.211125
ILMN_1774836	0.825427	0.0821	PLOD3	-1.82989	-4.34621	-0.377783	62739167	PLOD3	ACTGAATATGTCACCTTGCTCCCAAGACACGGCCCTCTCAGGAAGCTCCC	NM_001084.4		1.08566
ILMN_1734773	0.950052	0.438	PRSS1	-0.790765	-5.52701	-0.476044	21071011	PRSS1	ATGTTAATCAAGCTCTCCTCACGTGCAGTAATCAACGCCCGCGTGTCCAC	NM_002769.2		0.358526
ILMN_1672720	0.950052	0.314	PRSS12	1.03168	-5.32559	0.181897	21327713	PRSS12	CCTCCTGGGGGTATGGCTGTGGAGTCAAGGATTCTCCTGGTGTTTATACC	NM_003619.2		0.50307
ILMN_1750234	0.950052	0.545	PRSS2	-0.615038	-5.64238	-0.206402	21071012	PRSS2	TGGCACCGAGTCCCTCATCTCCGGCTGGGGCAACACTCTGAGTTCTGGTG	NM_002770.2		0.263603
ILMN_1685699	0.884509	0.128	PRSS3	1.58619	-4.69062	0.51093	21536451	PRSS3	TGAGCTTTGGTGCTGACTACCCAGACGAGCTGAAGTGCCTGGATGCTCCG	NM_002771.2		0.89279
ILMN_1708183	0.950052	0.331	PZP	0.996425	-5.35808	0.40836	4506354	PZP	CTGTGGTTGCTGAGTATATCGCCCCCTGCAGCACAGATACAGAGCATGGA	NM_002864.1		0.480172
ILMN_1793628	0.950052	0.414	SERPINA10	0.833341	-5.49498	0.15526	154759289	SERPINA10	GTGACTCATGGGCGAGGAGCATAGACAGTGTGGAGACATTGGGCAAGGGG	NM_016186.2		0.383
ILMN_2316955	0.950052	0.354	SERPINA11	0.948042	-5.40102	0.179937	122937296	SERPINA11	CCAAGGTGTCACACAAGGCGATGGTGGACATGAGTGAGAAGGGGACCGAG	NM_001080451.1		0.450997
ILMN_1791095	0.95493	0.688	SERPINA11	0.407323	-5.74277	0.0744975	122937296	SERPINA11	GTCAGACCCACATGCCCACTTCAACAGGCCTTTCCTCTTGCTCCTTTGGG	NM_001080451.1		0.162412
ILMN_1670669	0.950052	0.463	SERPINA12	0.747568	-5.5579	0.135305	31341191	SERPINA12	CCAGACTCCACATGACGGGCACCTTCGACCTGAAGAAGACTCTCTCCTAC	NM_173850.2		0.334419
ILMN_1759910	0.572615	0.0163	SERPINA5	-2.61953	-3.02743	-0.549247	34147643	SERPINA5	GTTATAATCTGATGGGCCTGGCTGGGAGTGGAAGAAGGGAAGCCTTTTGC	NM_000624.3		1.78781
ILMN_2215418	0.778238	0.0604	SERPINA6	1.98908	-4.10306	1.3742	73858563	SERPINA6	GGACGAGACAACTGTGGTGAAGGTGCCCATGATGTTGCAGTCGAGCACCA	NM_001756.3		1.21896
ILMN_1705243	0.95755	0.756	SERPINA7	0.315424	-5.77441	0.0621683	67010034	SERPINA7	CCCTGGCTGAACTTTGTTGGCTGTGGAAGAGGCCAATCCTATGGCAGAGC	NM_000354.3		0.121478
ILMN_2377385	0.950052	0.224	SERPINA9	-1.25467	-5.09732	-0.311918	110225348	SERPINA9	CAGGGACCCCAGTCACAAGCCAACACCCATTAACCCCAGTCAGTGCCCTT	NM_001042518.1		0.649752
ILMN_1683933	0.973734	0.856	SERPINA9	-0.184118	-5.80576	-0.0497133	31343337	SERPINA9	GGAGCCACTCACTCCAGAAAAGGTGGATAGAGGTGTTCATCCCCAGATTT	NM_175739.2		0.0675262
ILMN_2147424	0.950052	0.413	SERPINB10	0.836163	-5.4928	0.138945	4826901	SERPINB10	TCAAGTCAACCCTGAGCAGTATGGGGATGAGTGATGCCTTCAGCCAAAGC	NM_005024.1		0.38405
ILMN_1694917	0.950052	0.358	SERPINB11	0.940039	-5.40793	0.167136	17978302	SERPINB11	CAAAAGCCATCCACAAGTCATACCTGGATGTCAGCGAAGAGGGCACGGAG	NM_080475.1		0.446117
ILMN_2234517	0.955626	0.717	SERPINB12	0.368249	-5.75719	0.0668155	17998550	SERPINB12	CGTGCTGCTGCCATCTCACTCTAAAGATAACCTGAAGGGTCTGGAAGAGC	NM_080474.1		0.144481
ILMN_1769759	0.950052	0.36	SERPINB13	0.936583	-5.4109	0.189573	19923400	SERPINB13	CTAGGTTCACCAGTTGAGGGACATTTGGATTGTTCCCACTTCTTGGGCTG	NM_012397.2		0.443697
ILMN_2150851	0.951695	0.661	SERPINB2	0.445136	-5.72746	0.0798256	4505594	SERPINB2	GGTGTTATGACAGGGAGAACTGGACATGGAGGCCCACAGTTTGTGGCAGA	NM_002575.1		0.179799
ILMN_2150856	0.999752	0.998	SERPINB2	-0.00221377	-5.822	-0.00059209	4505594	SERPINB2	GAGATGTTTTCTACATATTTCTGCTCTTCTGAACAACTTCTGCTACCCAC	NM_002575.1		0.000869459
ILMN_1793888	0.947556	0.218	SERPINB5	1.27246	-5.07747	0.235126	142377273	SERPINB5	CATCTGGTCATGTGGTTGGCACTAGACTGGTGGCAGGGGCTTCTAGCTGA	NM_002639.3		0.661544
ILMN_2395139	0.950052	0.616	SERPINB7	0.509169	-5.69851	0.124998	92859646	SERPINB7	CCCCCATGACCCGTCTGGAAATTATGGAGAGTGCTCAACTGGTAAGGAGA	NM_003784.2		0.210419
ILMN_1767685	0.956243	0.733	SERPINB7	0.346112	-5.76473	0.0699001	92859646	SERPINB7	GTCTTTCTTCCCACGCTCATTTCTATCATTCTCCCCCATGACCCGTCTGG	NM_003784.2		0.134896
ILMN_2397028	0.972045	0.851	SERPINB8	0.19065	-5.80458	0.120991	38504672	SERPINB8	AGGAGCTGAGCATGGTCATTCTGCTTCCCGATGACAACACGGACCTCGCC	NM_002640.3		0.0700704
ILMN_1718960	0.988845	0.937	SERPINB8	0.0797378	-5.81895	0.0522394	38504668	SERPINB8	AGCTGAGCATGGTCATTCTGCTTCCCGATGACAACACGGACCTCGCCGTG	NM_198833.1		0.0282604
ILMN_1742052	0.903916	0.148	SERPINB9	1.50622	-4.79559	0.594969	34147494	SERPINB9	CAGACAAACTGTTTTCCACAGCAGTTGAACCATTCCACATTCCCACCAGC	NM_004155.3		0.829738
ILMN_2184250	0.979317	0.884	SERPINB9	0.14832	-5.81146	0.0637429	34147494	SERPINB9	CCACATTGGCCGTGTTGGTCTTGAACTCCTGGCCTCAAGCAATCCGCCTA	NM_004155.3		0.0535477
ILMN_1762605	0.920218	0.172	SERPINC1	1.41585	-4.9091	0.685042	50541941	SERPINC1	TGCTGGCCGTTCGCTAAACCCCAACAGGGTGACTTTCAAGGCCAACAGGC	NM_000488.2		0.764472
ILMN_1707975	0.950052	0.477	SERPIND1	0.724862	-5.57348	0.438386	73858565	SERPIND1	TCCTTGCACACCTGACTCTGTCACTCAAGCCTTTCTCCACCAGGCCCCTC	NM_000185.3		0.321482
ILMN_1744381	0.012025	2.15e-06	SERPINE1	6.54027	4.45468	2.14568	10835158	SERPINE1	GGAGCAGAAATGCAAGGGGCTGCATGACCTACCAGGACAGAACTTTCCCC	NM_000602.1		5.66756
ILMN_1655595	0.950052	0.371	SERPINE2	-0.914457	-5.42968	-0.213255	34147323	SERPINE2	GTCTTGCTAGACAAGGTTGCTGTTGTGCAGTGTGCCTGTCACTACTGGTC	NM_006216.2		0.430626
ILMN_3242398	0.799619	0.0683	SERPINE3	1.92591	-4.20115	0.373218	157674355	SERPINE3	CCACAAGGCCAAGATTGAAGTTTTGGAGGAAGGCACCAAGGCATCTGGAG	NM_001101320.1		1.16558
ILMN_2141482	0.877944	0.119	SERPINF1	-1.62699	-4.63547	-0.322558	54792142	SERPINF1	CCCTAGAAGAAAACCCGAGGGACAGCAGATTCCACAGGACACGAAGGCTG	NM_002615.4		0.924453
ILMN_1740005	0.958786	0.767	SERPINF2	-0.300435	-5.77881	-0.0716003	124053441	SERPINF2	TAACCTGCCGAGAGTCCATCAGCCTCCATCCTACCCCCTGTGCCTTGTCA	NM_000934.3		0.115205
ILMN_1711272	0.871088	0.112	SERPING1	1.66045	-4.58946	0.402415	73858567	SERPING1	TGACCCTGGGGGACTCTCTACTCAGTCTGCACTGGAGCTGCCTGGTGACC	NM_000062.2		0.950782
ILMN_1670305	0.950052	0.411	SERPING1	-0.840311	-5.48959	-0.215692	73858569	SERPING1	TGGGACCAGCAGCACAAGTTCCCTGTCTTCATGGGGCGAGTATATGACCC	NM_001032295.1		0.386158
ILMN_1751028	0.734807	0.0458	SERPINH1	-2.12869	-3.87925	-0.436108	32454740	SERPINH1	GCTGCCTCCCCAGCTCTATCCCAACCTCTCCCAACTATAAAACTAGGTGC	NM_001235.2		1.33913
ILMN_1814333	0.950052	0.263	SERPINI1	1.15067	-5.20859	0.462881	141803350	SERPINI1	GCTGGTGCTGTCCAGACAGGAAGTTCCTCTTGCTACTCTGGAGCCATTAG	NM_005025.3		0.580044
ILMN_2207988	0.950052	0.272	SERPINI1	-1.12966	-5.23006	-0.317562	54262134	SERPINI1	GGGACGAGTCATGCATCCTGAAACAATGAACACAAGTGGACATGATTTCG	NM_005025.2		0.565431
ILMN_1726225	0.927123	0.191	SERPINI2	1.35442	-4.98304	0.297306	59814587	SERPINI2	AGCTGCAACATCAACTGGCATACACATCCCTGTGATCATGAGTCTGGCTC	NM_006217.3		0.718967
ILMN_2114720	0.309648	0.00254	SLPI	-3.44396	-1.4479	-1.81596	15834622	SLPI	GGATCCTGTTGACACCCCAAACCCAACAAGGAGGAAGCCTGGGAAGTGCC	NM_003064.2		2.59517
ILMN_1661251	0.950052	0.402	SPAM1	0.856406	-5.47698	0.152255	23510416	SPAM1	TATCCTTAACCTTTTTGACATCATGGAGGCTTTGGGAATCTGATGAAGCC	NM_003117.3		0.395774
ILMN_1754438	0.950052	0.459	SPAM1	0.754502	-5.55305	0.122221	23510417	SPAM1	CATTTCTTCTGTAGCGAGTTTGTAATTGCGCAGGTTAGCTGAAATGAACA	NM_153189.1		0.338187
ILMN_1699887	0.950052	0.231	ST14	1.23544	-5.11851	0.405661	21264629	ST14	CACCAGCGCCCCCAGAACATACACTGTGAACTCAATCTCCAGGGCTCCAA	NM_021978.2		0.636388
ILMN_1702363	0.955042	0.703	SULF1	0.38703	-5.75044	0.165923	29789063	SULF1	CCTCACTGAGTCATCAGTACCCTCCTATTCAGCTCCCCAAGATGATGTGT	NM_015170.1		0.153045
ILMN_1686981	0.822991	0.0807	SULF2	1.83867	-4.33316	0.454729	38327656	SULF2	GTTTCAGCGTCGAAAGTGGCCAGAAATGAAGAGACCTTCTTCCAAATCAC	NM_018837.2		1.09313
ILMN_2345142	0.941718	0.208	SULF2	1.2995	-5.04685	0.637222	38327656	SULF2	ATCCCTCGCAGTTGTGGACATTTCTGTTCCTGTCCAGATACCATTTCTCC	NM_018837.2		0.681937
ILMN_1667460	0.950052	0.271	SULF2	1.13173	-5.22796	0.503019	38327656	SULF2	CAGGACAGAGGCAACGTGGAGAGGCTGAAAACAGTGCAGAGACGTTTGAC	NM_018837.2		0.567031
ILMN_1721134	0.950052	0.42	TGM1	0.823195	-5.50276	0.25503	110611244	TGM1	GAGCAATGGGACTGGAGTCAGATGAGCAAGGACATTGCCCCAAGATAGGG	NM_000359.2		0.376751
ILMN_1705750	0.950052	0.232	TGM2	-1.23253	-5.1217	-0.66064	39777596	TGM2	CTCCTGCTCTTTCTACATGACTGGGCCTCCCTTGGGCTGGAAGAATTGGG	NM_004613.2		0.634512
ILMN_1679267	0.964933	0.802	TGM2	-0.254018	-5.79111	-0.0672261	39777598	TGM2	GCCCTGTGTTCCTGGAGCATTTGTTGACCGCCAACTGACAACATGCTAGG	NM_198951.1		0.0958256
ILMN_1797236	0.985633	0.917	TGM2	0.105875	-5.81663	0.0469139	39777598	TGM2	AAGGGCGAACCACCTGAACAAACTGGCCGAGAAGGAGGAGACAGGGATGG	NM_198951.1		0.0376307
ILMN_1786847	0.96594	0.808	TGM3	0.245718	-5.79309	0.103444	39777600	TGM3	TGATCCCCAACCTGCACGGGGCATTCCTGCTTCTCTCTCAGGCCACCACA	NM_003245.2		0.0925886
ILMN_1669363	0.950052	0.532	TGM4	0.636466	-5.62979	0.115083	142351608	TGM4	CCATGGGTTCACCAGCCCTGAAGGCACCTGTCAACTGGAGTGCTCTCTCA	NM_003241.2		0.274088
ILMN_2345564	0.950052	0.546	TGM5	0.614335	-5.64279	0.105308	94981555	TGM5	ACCTACCCCTGCAAAATCTCCTATTCCCAGTACAGCCAGTACCTGTCAAC	NM_201631.2		0.262807
ILMN_1699925	0.950925	0.652	TGM5	0.458386	-5.72178	0.0811344	94981554	TGM5	CTCTCGGAGCAGGTTGAGGACTGTGTGCTGACTGTGGAAGGAAGTGGCCT	NM_004245.2		0.185752
ILMN_2259966	0.959163	0.771	TGM5	0.295257	-5.78028	0.0547663	94981555	TGM5	TGACGGCCTACCAGCTAGGGGAGTTCATCCTGCTTTTCAATCCCTGGTGC	NM_201631.2		0.112946
ILMN_1776214	0.950052	0.617	TGM6	0.507918	-5.69911	0.0920453	148664231	TGM6	GTCAACCCCCTCATAGAGAGAGTGAAGGACTGTGCGCTGATGGTGGAGGG	NM_198994.2		0.209715
ILMN_1691164	0.950052	0.61	TGM7	0.518316	-5.69406	0.0879852	16445034	TGM7	ATTGAGGTGTCTGAGAGGGCTGAGGTGGGCAAGGCGCTGAGAGTCCATGT	NM_052955.1		0.21467
ILMN_1711566	0.896357	0.139	TIMP1	-1.54037	-4.75127	-0.369518	73858576	TIMP1	AGTCCCTGCGGTCCCAGATAGCCTGAATCCTGCCCGGAGTGGAAGCTGAA	NM_003254.2		0.856985
ILMN_1721876	0.920218	0.174	TIMP2	-1.40999	-4.91627	-0.22897	73858577	TIMP2	GAAGAGCCGGGTGGCAGCTGACAGAGGAAGCCGCTCAAATACCTTCACAA	NM_003255.4		0.759451
ILMN_1749078	0.950925	0.649	TIMP2	-0.462558	-5.71996	-0.0669853	73858577	TIMP2	TGCAGCTGCTCCCCGGTGCACCCGCAACAGGCGTTTTGCAATGCAGATGT	NM_003255.4		0.187755
ILMN_1701461	0.601178	0.0186	TIMP3	2.56	-3.13535	0.360881	75905820	TIMP3	CCCCTCGTTCCAGACCTGCCTCATGGTGGCAACATGGTTCTTGAACAATT	NM_000362.4		1.73049
ILMN_1663399	0.950052	0.285	TIMP4	1.09781	-5.26195	0.463434	48255910	TIMP4	CTCCTTCCCTGCAGAGCTTTGGCCATTACCACCTGACCTCTTGCTGCCAG	NM_003256.2		0.545155
ILMN_1699814	0.950052	0.385	TLL1	-0.887318	-5.45215	-0.277248	22547220	TLL1	CTGATTGACATCTTATTAGGCCATAGTGAGCTATGCTCTGCACAACTGAG	NM_012464.3		0.414539
ILMN_2206307	0.950052	0.474	TLL2	0.730435	-5.5697	0.143931	22547222	TLL2	CCCAGGGAAGCCAAAAGATGGGACACCCCTGCTGTAAAGTTTCATATCAC	NM_012465.2		0.324222
ILMN_1660995	0.950052	0.296	AMH	1.07268	-5.28654	0.247071	6138973	AMH	CTCATCAGCCTGTCGGAGGAACGCATCAGCGCGCACCACGTGCCCAACAT	NM_000479.2		0.528708
ILMN_2086890	0.950052	0.345	ANGPT1	-0.967595	-5.3839	-0.255251	21328452	ANGPT1	GGGCCTCCTCTCATAAAAGAGACAGTTGTTGGCAAGGTAGCAATACCAGT	NM_001146.3		0.462181
ILMN_1677723	0.950052	0.529	ANGPT1	-0.63988	-5.62774	-0.131514	21328452	ANGPT1	ATTCTTGGTGGCTTCTTCATAGCAGGTAAGCCTCTCCTTCTAAAAACTTC	NM_001146.3		0.276544
ILMN_3250067	0.882581	0.125	ANGPT2	-1.60087	-4.67089	-0.804285	169646753	ANGPT2	TTGGACTGCATTCCTCACTACTTTTTGCACAATGGTCTCACGTTCTCACA	NM_001118888.1		0.90309
ILMN_1774207	0.951635	0.657	ANGPT2	0.450691	-5.7251	0.250371	4557314	ANGPT2	ACAGAGGGCGTGTGCTCGGTGCTGACGGGACCCACATGCTCCAGATTAGA	NM_001147.1		0.182435
ILMN_3250879	0.96062	0.778	ANGPT2	-0.285957	-5.78287	-0.157516	169646748	ANGPT2	GACACAGCAAAAAGTGATACACTCCGCAGATCTGAAATAGATGTGTTCTC	NM_001118887.1		0.10902
ILMN_1758443	0.978238	0.88	ANGPT4	-0.152948	-5.81079	-0.0936678	21328453	ANGPT4	CACACAGGAGAAGCTCGGACTTGGCACTCCTGGACAACCTGGACCCAGAT	NM_015985.2		0.0555173
ILMN_1669773	0.950052	0.524	ANGPTL1	-0.649024	-5.62221	-0.246486	38327520	ANGPTL1	CTGTTTTCCCGATACTGAGAATTCAACAGCTCCAGAGCAGAAGCCACAGG	NM_004673.3		0.280669
ILMN_2145501	0.950052	0.598	ANGPTL1	0.535949	-5.68528	0.11547	38327520	ANGPTL1	GTTTTACCTGTGGTCATCTTAAACTGGTTTTTCAGTCCCTCTCCACTTCC	NM_004673.3		0.223299
ILMN_1772612	0.965017	0.803	ANGPTL2	-0.253391	-5.79126	-0.156942	34577067	ANGPTL2	CGTGGGCCAGGCTGTGTGAGATGTTGGATGTTTGGTACTGTCCATGTCTG	NM_012098.2		0.0952845
ILMN_1695193	0.950052	0.305	ANGPTL3	-1.05281	-5.30564	-0.462778	41327750	ANGPTL3	CTGTCCAGAGGGTTATTCAGGAGGCTGGTGGTGGCATGATGAGTGTGGAG	NM_014495.2		0.5157
ILMN_2143220	0.956262	0.734	ANGPTL3	0.344419	-5.76528	0.0577508	41327750	ANGPTL3	GGAGATGACTACTAAGTCACATTGACTTTAACATGAGGTATCACTATACC	NM_014495.2		0.134304
ILMN_1707727	0.223923	0.00112	ANGPTL4	3.79497	-0.74821	1.31266	21536397	ANGPTL4	GGGACACAAGCAGGCGCCAATGGTATCTGGGCGGAGCTCACAGAGTTCTT	NM_139314.1		2.95078
ILMN_2386444	0.92383	0.178	ANGPTL4	1.39434	-4.93529	0.22216	89264695	ANGPTL4	GACAGAGAAGAAGACCACGACTGGAGAAGCCCCCTTTCTGAGTGCAGGGG	NM_001039667.1		0.74958
ILMN_1674376	0.950052	0.364	ANGPTL4	0.92842	-5.41787	0.163628	21536397	ANGPTL4	TGGGCAGGGGCTCCAAGGAGGGGCCATCTGGAAACTTGTGGACAGAGAAG	NM_139314.1		0.438899
ILMN_1725518	0.950052	0.287	ANGPTL6	1.09451	-5.2652	0.241511	29893554	ANGPTL6	TGGCACAATGACAAGCCCTTCAGCACCGTGGATAGGGACCGAGACTCCTA	NM_031917.2		0.542118
ILMN_1813361	0.95755	0.754	ANGPTL7	0.31705	-5.77392	0.104604	20127595	ANGPTL7	CCCCTGCTCGCCTTGGTCATGTACAGCACTGAAAGGAATGAAGCACCAGC	NM_021146.2		0.122629
ILMN_1804421	0.950052	0.467	AREG	0.741967	-5.56178	0.131868	22035683	AREG	AGTGTATTTATTTTACAGCTCATTAAACTTTTTTAACCAAACAGAAAAAA	NM_001657.2		0.330683
ILMN_1773295	0.92654	0.189	ARTN	1.35835	-4.97839	0.480063	16950644	ARTN	TGCCCGGCCTGATCTCAGCCCGAGGACAGCCCCTCCTTGAGGTCCTTCCT	NM_057160.1		0.723538
ILMN_1803691	0.950052	0.335	ARTN	-0.988691	-5.36507	-0.507095	16950642	ARTN	TCCCAGCCTAAAAGACACCAGAGACCTCAGCTATGGAGCCCTTCGGACCC	NM_057091.1		0.474955
ILMN_1762952	0.950052	0.574	ARTN	0.571892	-5.66649	0.101316	16950642	ARTN	AGCACTGGTCCCCGGAAAGGTGCCTAGAAGAACAAGGTGCAGGACCCCGT	NM_057091.1		0.241088
ILMN_1727040	0.961479	0.783	ARTN	0.279007	-5.78474	0.0559602	16950639	ARTN	CTGCTGGGTTGAGTCTAGCTGTGTAGGCCCCTTGTTCCTCACCTGGAGAA	NM_003976.2		0.106238
ILMN_1761910	0.950052	0.282	BDNF	1.10431	-5.2555	0.197104	34106711	BDNF	CCCTCCACCTCCTGCTCGGGGGGCTTTAATGAGACACCCACCGCTGCTGT	NM_001709.3		0.549751
ILMN_1751276	0.950052	0.362	BDNF	-0.933423	-5.41361	-0.509587	34106711	BDNF	CTTGCTGTGGTCTCTTTGTGGCAGAAGTGTTTCATGCATGGCAGCAGGCC	NM_001709.3		0.441291
ILMN_1809543	0.950052	0.4	BDNF	0.859908	-5.47421	0.143413	34106708	BDNF	AATAATAGAGTGTGGGAGTTTTGGGGCCGAAGTCTTTCCCGGAGCAGCTG	NM_170733.2		0.39794
ILMN_1719820	0.950052	0.549	BDNF	0.609697	-5.64546	0.108644	60218884	BDNF	GCTCGCTGAAGTTGGCTTCCTAGCGGTGTAGGCTGGAATAGACTCTTGGC	NM_170732.3		0.260428
ILMN_1706644	0.950052	0.608	BDNF	0.520409	-5.69304	0.094122	34106709	BDNF	ATGTACGTGGGGGATTCTTGACTCGGGTTAGTCTCTGGGGATGCAGAGCC	NM_170734.2		0.216096
ILMN_1712712	0.950052	0.616	BDNF	0.509719	-5.69824	0.0911589	60218885	BDNF	TCAGACCCCTCAGGCCACTGCTGTTCCTGTCACACATTCCTGCAAAGGAC	NM_170735.4		0.210419
ILMN_1793988	0.950925	0.645	BDNF	0.467241	-5.7179	0.0818318	60218883	BDNF	TGGGGAGACGAGATTTTAAGACACTTGAGTCTCCAGGACAGCAAAGGCAC	NM_170731.3		0.19044
ILMN_1791688	0.950925	0.645	BMP10	0.46762	-5.71773	0.0906201	7656927	BMP10	CCGTGGTGTTTGTAACTACCCCCTGGCAGAGCATCTCACACCCACAAAGC	NM_014482.1		0.19044
ILMN_1702755	0.918673	0.168	BMP15	1.42996	-4.89175	0.328391	4885096	BMP15	GGAACTTGTCTCCGAGTACTACGCGATGGTCTCAATTCCCCCAATCACGC	NM_005448.1		0.774691
ILMN_1722718	0.148179	0.000409	BMP2	4.22484	0.11269	1.2278	80861484	BMP2	TTGTGGCTCCCCCGGGGTATCACGCCTTTTACTGCCACGGAGAATGCCCT	NM_001200.2		3.38828
ILMN_1682661	0.548497	0.0144	BMP3	2.67813	-2.92013	0.524587	126507086	BMP3	AGTGAGAGCTGTGGGGGTCGTTCCTGGGATTCCTGAGCCTTGCTGTGTAC	NM_001201.2		1.84164
ILMN_1740900	0.71192	0.0402	BMP4	-2.19318	-3.7728	-0.751529	19528651	BMP4	AGTAGAGGGATGTGGGTGCCGCTGAGATCAGGCAGTCCTTGAGGATAGAC	NM_130851.1		1.39577
ILMN_1693749	0.841691	0.0926	BMP4	1.7657	-4.44033	0.58384	19528651	BMP4	GAGACGCAGACGCAGAGGTCGAGCGCAGGCCGAAAGCTGTTCACCGTTTT	NM_130851.1		1.03339
ILMN_1709734	0.986749	0.927	BMP4	0.093016	-5.81785	0.0187796	19528648	BMP4	ACGCCGCTGCTGCTCCGGCTGAGTATCTAGCTTGTCTCCCCGATGGGATT	NM_001202.2		0.0329203
ILMN_1660552	0.950052	0.368	BMP5	-0.921566	-5.42369	-0.425872	24797149	BMP5	CGGGATCTGGGATGGCAGGACTGGATTATAGCACCAGAAGGATACGCTGC	NM_021073.2		0.434152
ILMN_1747650	0.959163	0.769	BMP6	-0.297253	-5.77972	-0.0687948	133930782	BMP6	AATGAGGGTGCCCAGCTTATAAGAATGGTGTTAGGGGGATGAGCATGCTG	NM_001718.4		0.114074
ILMN_1741566	0.93572	0.198	BMP7	1.33157	-5.00985	0.239675	4502426	BMP7	TGGCAAGGGGTGGGCACATTGGTGTCTGTGCGAAAGGAAAATTGACCCGG	NM_001719.1		0.703335
ILMN_1761264	0.950052	0.528	BMP8A	0.642801	-5.62598	0.116894	145611427	BMP8A	CACCTGATGAAGCCAAACGCAGTCCCCAAGGCGTGCTGTGCACCCACCAA	NM_181809.3		0.277366
ILMN_2123415	0.953066	0.669	BMP8B	-0.433819	-5.73219	-0.21956	50962825	BMP8B	TGCAGTGAGCAGAGATCACAACATTGCACTTCAGCCTGGTGACATGAGCA	NM_001720.3		0.174574
ILMN_2081070	0.956045	0.723	BTC	-0.359697	-5.76016	-0.14259	4502460	BTC	CTTCGTGGTGGCCGAGCAGACGCCCTCCTGTGTCTGTGATGAAGGCTACA	NM_001729.1		0.140862
ILMN_1712461	0.950052	0.554	CBLN1	0.601088	-5.65036	0.207743	4757921	CBLN1	ATCCTCGGCTGCTTGTTAGCAGAGAAAGGACTCACCTTAGTGGTGACTGG	NM_004352.1		0.25649
ILMN_1796069	0.950052	0.603	CBLN2	0.529038	-5.68876	0.0932046	40255263	CBLN2	TCCGGATCCTCTTTTGATCTGCCCAGGAAAGGGATGCATTGACACTCTCC	NM_182511.2		0.219683
ILMN_2053829	0.668378	0.0313	CBLN3	-2.31415	-3.56829	-1.05294	126722638	CBLN3	AGGAGAAGATGCCTCTGGAGTTTGGATCGGGTGTTACAGGTACAAGTAGG	NM_001039771.2		1.50446
ILMN_1699768	0.950052	0.227	CBLN4	1.24572	-5.10721	0.483632	50593529	CBLN4	GTGCTCAATCCCTGAGCCTCAGCAAAACAGCTCCCCTCCGAGGGAAATCT	NM_080617.4		0.643974
ILMN_1813528	0.950052	0.329	CCBE1	1.0007	-5.3542	0.385422	39930510	CCBE1	TGTGGATTCAGAAGCACCAGGAGCAAGAGACCAGAAGGATGATCTGCTCC	NM_133459.1		0.482804
ILMN_2122511	0.962165	0.786	CCBE1	-0.275647	-5.78563	-0.0513473	39930510	CCBE1	GGAGGCTGAGGCGGGGAGATCACAAGGTCAGGAGATCGAGACCAGCCTGA	NM_133459.1		0.104577
ILMN_2086965	0.950052	0.322	CCL1	1.0157	-5.34044	0.169956	4506832	CCL1	GGCCGGAAGATGTGGACAGCAAGAGCATGCAGGTACCCTTCTCCAGATGT	NM_002981.1		0.492144
ILMN_1725519	0.950052	0.298	CCL11	-1.06886	-5.29024	-0.500609	22538399	CCL11	TCTTTACCCCCTGGGAGCCCCAATTCGATCCCCTGTCACGTGTGGGCAAT	NM_002986.2		0.525784
ILMN_1710186	0.955626	0.717	CCL17	0.366999	-5.75763	0.102493	22538801	CCL17	GGAGTACTTCAAGGGAGCCATTCCCCTTAGAAAGCTGAAGACGTGGTACC	NM_002987.2		0.144481
ILMN_1769129	0.342738	0.00337	CCL19	-3.3214	-1.68991	-2.53085	22165424	CCL19	GGACCTCAGCCAAGATGAAGCGCCGCAGCAGTTAACCTATGACCGTGCAG	NM_006274.2		2.47237
ILMN_1720048	0.642191	0.0273	CCL2	2.37942	-3.4555	0.518423	56119169	CCL2	CAGGATTCCATGGACCACCTGGACAAGCAAACCCAAACTCCGAAGACTTG	NM_002982.3		1.56384
ILMN_1657234	0.950052	0.535	CCL20	-0.631196	-5.63292	-0.229943	4759075	CCL20	CCTTGCTGGGGTTGGAGGTTTCACTTGCACATCATGGAGGGTTTAGTGCT	NM_004591.1		0.271646
ILMN_2160476	0.950052	0.39	CCL22	-0.877769	-5.45991	-0.372755	22538803	CCL22	GAACCTGTGGAATTGGAGGAGGCCATTTCACTCCCTGAACCCAGCCTGAC	NM_002990.3		0.408935
ILMN_1653766	0.965439	0.807	CCL24	0.247515	-5.79266	0.123717	22165426	CCL24	CAGCAGTTCTGTGGCGACCCCAAGCAGGAGTGGGTCCAGAGGTACATGAA	NM_002991.2		0.0931265
ILMN_1737817	0.950052	0.253	CCL25	1.1766	-5.18162	0.333851	22538795	CCL25	GTGTGTCCCTCTGGGTCCCTCCAAAACTCTGGTCAGTTCAAGGATGCCCC	NM_005624.2		0.596879
ILMN_1782596	0.950052	0.6	CCL25	0.53304	-5.68675	0.090473	22538795	CCL25	AGGTGTGTGGGAACCCCAAAAGCAGGGAGGTGCAGAGAGCCATGAAGCTC	NM_005624.2		0.221849
ILMN_1659601	0.950052	0.395	CCL26	-0.869111	-5.46687	-0.347675	51944958	CCL26	TCCAAGACCTGCTGCTTCCAATACAGCCACAAGCCCCTTCCCTGGACCTG	NM_006072.4		0.403403
ILMN_2228845	0.967734	0.818	CCL28	-0.232659	-5.79608	-0.0793566	90970326	CCL28	CAAGAGGAACAGTAACAGGGCACATCAGGGGAAACACGAAACATACGGCC	NM_148672.2		0.0872467
ILMN_1671509	0.046285	4.13e-05	CCL3	5.20991	2.04569	2.22188	4506842	CCL3	CCTCTGCACCATGGCTCTCTGCAACCAGTTCTCTGCATCACTTGCTGCTG	NM_002983.1		4.38405
ILMN_2098126	0.785059	0.0626	CCL5	-1.97107	-4.13123	-0.593643	22538813	CCL5	CCGCCGTCTCAACCCCTCACAGGAGCTTACTGGCAAACATGAAAAATCGG	NM_002985.2		1.20343
ILMN_1773352	0.937141	0.199	CCL5	-1.32762	-5.01445	-0.632105	22538813	CCL5	ATTTGCCTGTTTCTGCTTGCTCTTGTCCTAGCTTGGGAGGCTTCCCCTCA	NM_002985.2		0.701147
ILMN_1683456	0.950052	0.495	CCL7	0.695445	-5.59299	0.125417	13435401	CCL7	TCTGTGCTGACCCCACACAGAAGTGGGTCCAGGACTTTATGAAGCACCTG	NM_006273.2		0.305395
ILMN_1772964	0.950052	0.496	CCL8	0.692754	-5.59474	0.265362	22538815	CCL8	GTCATTGTTCTCCCTCCTACCTGTCTGTAGTGTTGTGGGGTCCTCCCATG	NM_005623.2		0.304518
ILMN_2110094	0.950052	0.56	CFC1	0.59304	-5.65489	0.104142	24234758	CFC1	TTATTGGGTAATAAATATTTTCATGAAAGCGCCTTTGGCTCCAGATCCTT	NM_032545.2		0.251812
ILMN_1795582	0.950052	0.358	CHRD	-0.939805	-5.40813	-0.250668	30089979	CHRD	ACCCTCGGCCTCTGTCCTGGAAGCCCCACCCCTTTCCTCCTGTACATAAT	NM_003741.2		0.446117
ILMN_2184231	0.678365	0.0331	CHRDL1	2.28722	-3.61434	0.659353	34147714	CHRDL1	GCTAGCCAAGATTCTACGTTACTTTTCCCTTGACTGGATCCCAAGTAGCT	NM_145234.2		1.48017
ILMN_1678233	0.950052	0.27	CHRDL1	1.13324	-5.22642	0.410375	34147714	CHRDL1	TGTGCCCAGGAGAGTAAATAACTGTGAACAAGAGGCTCTGCCCTTAGGTC	NM_145234.2		0.568636
ILMN_1682737	0.958643	0.765	CHRDL2	0.30337	-5.77797	0.154913	40353768	CHRDL2	GAAGCAAGACTTCCAGAAAGAGGCACAGCACTTCCGACTGCTCGCTGGCC	NM_015424.3		0.116339
ILMN_1661197	0.493255	0.00987	CLCF1	2.84865	-2.60255	1.47677	50726992	CLCF1	CCAGTATTACGGTGCCTCTTCTCTGCCCCCTTTCCCAGGGTATCTGTGGG	NM_013246.2		2.00568
ILMN_1773113	0.950052	0.299	CNTF	1.06556	-5.29342	0.575117	25952136	CNTF	ACCCAGCTGACTTGTTTCCTGGGACAGTTGAGTTAAGGGATGGCTTTCAC	NM_000614.2		0.524329
ILMN_2223561	0.851733	0.1	CRHBP	1.72198	-4.50308	0.398285	47080098	CRHBP	GTGCTACAAACCTGAAACTGGTAAGACAAGCACAAAGCAACGTGCAATAC	NM_001882.3		1
ILMN_1761312	0.978921	0.882	CRHBP	-0.15014	-5.8112	-0.0261741	47080098	CRHBP	AAAGCCTTTCATACCAGTCAGTATTCCCAGCCTTGAGCGCACGCGCGCAC	NM_001882.3		0.0545314
ILMN_1681515	0.950052	0.513	CRLF1	0.665746	-5.61191	0.115574	21361081	CRLF1	AACCCAAACTGGGGCCACCTCTGTACCCTCACTTCAGGGCACCTGAGCCA	NM_004750.2		0.289883
ILMN_1660579	0.955042	0.706	CRLF3	0.382361	-5.75215	0.109393	27764872	CRLF3	GGGTGCTTGGCTTTGGTTTTCAGGGTCTAACGTAGCTGTCCTCAGCCCAG	NM_015986.2		0.151195
ILMN_2155228	0.993698	0.969	CRLF3	-0.0394866	-5.82125	-0.0116135	27764872	CRLF3	GCACGTGTGTATCCAATCTGCCTGTGACATGCATTTTACTCTTTGCAGAG	NM_015986.2		0.0136762
ILMN_1727220	0.980665	0.891	CRNN	0.138179	-5.81285	0.0319064	7706634	CRNN	ACCTGCTTTGCGGTGCAGACCCTCTCAGGAGCAGGAAGACTCAGAGCAAG	NM_016190.1		0.0501223
ILMN_1733402	0.950052	0.303	CSF1	1.05638	-5.30223	0.598638	27262666	CSF1	GGAGCCATCAAGAGCCTCAGAGAGCGGATTCTCCCTTGGAGCAACCAGAG	NM_172212.1		0.518557
ILMN_1805930	0.964841	0.8	CSF1	-0.256141	-5.79059	-0.150607	27262666	CSF1	GTCATCTCCGTAGCCCTCCCAGTTGTGCCTCCTGCACATTGATGAGTGCC	NM_172212.1		0.09691
ILMN_2302947	0.996621	0.983	CSF1	-0.0216445	-5.82178	-0.0126049	27262660	CSF1	GCCCCCTGACTCAGGATGACAGACAGGTGGAACTGCCAGTGTAGAGGGAA	NM_000757.3		0.00744648
ILMN_1661861	0.950052	0.371	CSF2	0.915156	-5.42909	0.182579	27437029	CSF2	TGGACCTGCCCTGGGCCACACTGACCCTGATACAGGCATGGCAGAAGAAT	NM_000758.2		0.430626
ILMN_1697069	0.876602	0.118	CSF3	1.63486	-4.62471	0.654164	27437047	CSF3	AAACAGCAGTGTTCCCCATCTGGGTCCTTGCACCCCTCACTCTGGCCTCA	NM_000759.2		0.928118
ILMN_1706852	0.950052	0.399	CSF3	0.862092	-5.47247	0.162247	27437050	CSF3	TAAAGGCACCCAGTGTCCCCGAGAGGGCCTCAGGTGGTAGGGAACAGCAT	NM_172220.1		0.399027
ILMN_2322768	0.950052	0.508	CSF3	0.674725	-5.60627	0.124675	27437047	CSF3	TTGGCTGTGAGGCCCCTGGACAAGCAGAGGTGGCCAGAGCTGGGAGGCAT	NM_000759.2		0.294136
ILMN_1661804	0.950052	0.247	CTF1	1.19279	-5.16452	0.72218	40788012	CTF1	ATCTCAGCCACCTTCCTCAGGCTCACTCCACCTACATCCCCAGTCTGCCA	NM_001330.2		0.607303
ILMN_1654072	0.950052	0.301	CX3CL1	1.06071	-5.29808	0.549801	54111253	CX3CL1	TTTGTGAGGAAGCCGCTGGGGCCAGTTGGTCCCCCTTCCATGGACTTTGT	NM_002996.3		0.521434
ILMN_1787897	0.735409	0.0462	CXCL1	-2.12466	-3.88584	-0.466192	4504152	CXCL1	GGCTGGCGGATCCAAGCAAATGGCCAATGAGATCATTGTGAAGGCAGGGG	NM_001511.1		1.33536
ILMN_1791759	0.950052	0.349	CXCL10	-0.958286	-5.39209	-0.511166	149999381	CXCL10	GACTTCCACTGCCATCCTCCCAAGGGGCCCAAATTCTTTCAGTGGCTACC	NM_001565.2		0.457175
ILMN_2067890	0.950052	0.326	CXCL11	1.00587	-5.34947	0.244794	14790145	CXCL11	GGGATACTGGCAACAGTGCACATATTTCATAACCAAATTAGCAGCACCGG	NM_005409.3		0.486782
ILMN_2067895	0.950052	0.378	CXCL11	0.902117	-5.43997	0.171215	14790145	CXCL11	TGTTTTTCAACTTTTATTCATTGAGATGTTTTGAAGCAATTAGGATATGT	NM_005409.3		0.422508
ILMN_1689111	0.950052	0.321	CXCL12	1.0167	-5.33952	0.228134	76563934	CXCL12	CAGCCTGAGCTACAGATGCCCATGCCGATTCTTCGAAAGCCATGTTGCCA	NM_000609.4		0.493495
ILMN_1803825	0.950408	0.626	CXCL12	-0.494881	-5.7053	-0.23422	76563934	CXCL12	CCCTGACTGGGAGTTGATCGCCTTTCCCAGGTGCTACACCCTTTTCCAGC	NM_000609.4		0.203426
ILMN_1791447	0.983907	0.904	CXCL12	0.122441	-5.81481	0.0643112	76563931	CXCL12	CAGTGAATAAACCATCATCTTGCCACTACCCCCTCCTGAAGCCACAGCAG	NM_199168.2		0.0438316
ILMN_1718552	0.956262	0.737	CXCL13	0.340159	-5.76667	0.114153	5453576	CXCL13	TGCCTGGGAGGCAGATGGAACTTGAGCCTGTCAAGAGGCAAAGGAATCCA	NM_006419.1		0.132533
ILMN_1748323	0.950052	0.284	CXCL14	-1.10032	-5.25947	-0.204897	23199988	CXCL14	CCTCTGTACATATACCCTTAAGAACGCCCCCTCCACACACTGCCCCCCAG	NM_004887.3		0.546682
ILMN_1682636	0.107312	0.0002	CXCL2	4.53071	0.72174	2.14663	148298657	CXCL2	TCGTGATGACATATCACATGTCAGCCACTGTGATAGAGGCTGAGGAATCC	NM_002089.3		3.69897
ILMN_1709350	0.950052	0.377	CXCL3	0.902877	-5.43934	0.154572	54144649	CXCL3	CCTTGATAAATGACAGGGTGGGGAACTGGAGGGTGGGGGGATTGAAATGC	NM_002090.2		0.423659
ILMN_2171384	0.950052	0.302	CXCL5	1.06023	-5.29855	0.22381	41872613	CXCL5	AAGAGAAAATGTGACACTTGTGAAAAGGCTTGTAGGAAAGCTCCTCCCTT	NM_002994.3		0.519993
ILMN_1745356	0.950052	0.248	CXCL9	1.18971	-5.16778	0.334106	4505186	CXCL9	TGATTGGTGCCCAGTTAGCCTCTGCAGGATGTGGAAACCTCCTTCCAGGG	NM_002416.1		0.605548
ILMN_1799996	0.963406	0.79	DHH	0.270071	-5.78708	0.0487699	23346635	DHH	ATGGGGCTATGCCTGGCTTAGGGGCAACCTCGTACTGAGAGGAGGTGATA	NM_021044.2		0.102373
ILMN_1802653	0.969061	0.828	EBI3	0.220587	-5.79869	0.125059	14577916	EBI3	GAGCTGCCGGGCAACCTCAGATGACCGACTTTTCCCTTTGAGCCTCAGTT	NM_005755.2		0.0819697
ILMN_1791250	0.950052	0.609	EDA	0.519205	-5.69363	0.349812	54112100	EDA	CCATCACCAGTCACCTTGGGCAGCCGTCACCTAAGCAGCAGCCATTGGAA	NM_001005609.1		0.215383
ILMN_2381655	0.950925	0.642	EDA	0.471844	-5.71585	0.306467	54112102	EDA	AGTCACCTTGGGCAGCCGTCACCTAAGCAGCAGCCATTGGAACCGGGAGA	NM_001005610.1		0.192465
ILMN_1684000	0.955042	0.693	EDA	-0.401093	-5.74517	-0.0779487	54112108	EDA	TCTTATGGCCTACAAGGTTTCTGCTGAGAAATCCACTGATATTCTAATGG	NM_001005613.1		0.159267
ILMN_1671633	0.978092	0.879	EDA	0.154256	-5.8106	0.0267553	54112110	EDA	TCCCAGAAGGAAAATTTGAGATGTAAGACAGAAGAACAAGCAAAGATTGT	NM_001005614.1		0.0560111
ILMN_1709975	0.992667	0.96	EDA	-0.050835	-5.82076	-0.0257753	54112104	EDA	GCTTGGCCCTTCTGCTCGTGATGAGGTTCTCTGCCCGCGGTGCTTGTTTT	NM_001005611.1		0.0177288
ILMN_1690733	0.918673	0.168	EGF	1.42836	-4.89372	0.643459	6031163	EGF	GCAGCCCCAGAAGAAATTAGGGGTTAAAGCAGACAGTCACACTGGTTTGG	NM_001963.2		0.774691
ILMN_2057479	0.912023	0.161	EGFL6	1.45698	-4.85813	0.473078	13124887	EGFL6	CATCAAAGATAGACTTTTGCCTAAGTGGCTTAGCTGGGTCTTTCATAGCC	NM_015507.2		0.793174
ILMN_1716309	0.950052	0.352	EGFL6	0.951755	-5.39779	0.175323	13124887	EGFL6	CCCTGGCATGGGAGAAGACCACGAGTGAGGATGAAAAGTGGAAGACAGGG	NM_015507.2		0.453457
ILMN_2381730	0.969427	0.83	EGFL7	0.217638	-5.79931	0.0926885	41393581	EGFL7	CAACCCGACAGGAGTGGACAGTGCAATGAAGGAAGAAGTGCAGAGGCTGC	NM_016215.3		0.0809219
ILMN_1669898	0.975727	0.868	EGFL7	0.168687	-5.80836	0.0916425	41393582	EGFL7	TGCTCCTGCAAGAAAGACTCGTGACTGCCCAGCGCCCCAGGCTGGACTGA	NM_201446.1		0.0614803
ILMN_1693515	0.950052	0.594	EGFL8	0.541036	-5.68269	0.0989597	77681597	EGFL8	GGGCCAAGGGTGGATCCCTCAGAGAGAGTCAGGGAGTCTGCTCCAAGCAG	NM_030652.2		0.226214
ILMN_1815313	0.950052	0.345	EPGN	0.966994	-5.38443	0.154321	61806621	EPGN	TGAGGAGGACAGCAGGCCCCAAGAAAGTAGGGACTAAGTATGTCTTGTTC	NM_001013442.1		0.462181
ILMN_1665671	0.95755	0.754	EPO	-0.317142	-5.77389	-0.114926	62240996	EPO	ACTTAGGTGGCAAGCTGTGACTTCTCCAGGTCTCACGGGCATGGGCACTC	NM_000799.2		0.122629
ILMN_1657248	0.950052	0.46	EREG	0.752727	-5.55429	0.138436	119703747	EREG	CATCTGTGCCCGATTTTAGTATGTGCAGGGGGGCGATCTGGGAATCAGTC	NM_001432.2		0.337242
ILMN_1662949	0.950052	0.602	FAM132A	-0.52917	-5.68869	-0.282726	121949745	FAM132A	CGGGACGTGGTGTGTGTTCTCATCTGTATTGAGTCCCTGTGCCAGCGCCA	NM_001014980.1		0.220404
ILMN_1753322	0.642191	0.0273	FGF1	2.37938	-3.45557	0.956822	15055546	FGF1	TGATTCAGTGGGTTGGGGGCAGAGTTTCTGCAGTTCCATCAGGTCCCCCC	NM_000800.2		1.56384
ILMN_2349982	0.778215	0.0603	FGF1	1.99005	-4.10154	0.779863	15055540	FGF1	CGACGCCCCGAACCTCACCTGACCTCAACTAACCCTTAAAAATGCACACC	NM_033136.1		1.21968
ILMN_1699735	0.954856	0.682	FGF1	0.415187	-5.7397	0.0744296	15055546	FGF1	CAGTGCGGAAAGCGTGGGGGAGGTGTATATAAAGAGTACCGAGACTGGCC	NM_000800.2		0.166216
ILMN_2110110	0.980477	0.889	FGF10	0.141187	-5.81245	0.0326554	4758359	FGF10	CAAGATTGAGAAGAACGGGAAGGTCAGCGGGACCAAGAAGGAGAACTGCC	NM_004465.1		0.0510982
ILMN_1719938	0.950052	0.223	FGF11	1.25622	-5.0956	0.807834	38683846	FGF11	AGGAGTAGATGCCCCCTCACCCACACAAACCCCACTCAGTCTCCACCCAA	NM_004112.2		0.651695
ILMN_1677680	0.950052	0.333	FGF12	0.992286	-5.36183	0.385098	21614509	FGF12	GCAGCTATGACTCCAACAGACAGGATTGTGTGAGCAGCTGAAAGGAGCAA	NM_021032.2		0.477556
ILMN_1672229	0.954198	0.678	FGF12	-0.420925	-5.73742	-0.262689	21614510	FGF12	GGCCCACATCTTCCGGCCAACTTCCATTGAACTTCCCAGCACTCGAAAGG	NM_004113.3		0.16877
ILMN_1810283	0.956262	0.74	FGF12	0.337065	-5.76767	0.0855388	21614509	FGF12	TGTGCGAGAGGCACGTCCTCGGGGTGTTCAGCAAAGTGCGCTTCTGCAGC	NM_021032.2		0.130768
ILMN_1671777	0.950052	0.469	FGF13	-0.738233	-5.56436	-0.197596	16306544	FGF13	GTTGTGGCTTCTTGTGTAAAGACAGGAACTGTGGAACTGTGATGTTGTCT	NM_004114.2		0.328827
ILMN_1690984	0.955042	0.709	FGF13	0.378549	-5.75353	0.0757098	16306544	FGF13	GCGAAGATGCGAGGCCATTACCTGTTTGATCCCTGTCGGAAACCTGGCAC	NM_004114.2		0.149354
ILMN_1653826	0.981389	0.895	FGF13	-0.133461	-5.81346	-0.0298972	16306542	FGF13	CTCTGTGTCTGCTCCAAATGTAGACAGCAATTGTCTGGGTAGGACCAGCT	NM_033642.1		0.048177
ILMN_1732976	0.95755	0.758	FGF14	-0.31239	-5.77532	-0.11767	28872754	FGF14	CGGGCTCTGCAACGGCAACCTGGTGGATATCTTCTCCAAAGTGCGCATCT	NM_004115.2		0.120331
ILMN_1751495	0.961464	0.782	FGF14	0.280565	-5.78432	0.115805	28872755	FGF14	CAACCACAAGGATCTCTTCTTTCTCAGGGTGTCTAAGCTGCTGGATTGCT	NM_175929.1		0.106793
ILMN_1785564	0.950923	0.629	FGF16	-0.490253	-5.70746	-0.107241	4503690	FGF16	CGTGGCCCTGAACAAAGATGGCTCACCCCGGGAGGGATACAGGACTAAAC	NM_003868.1		0.201349
ILMN_1781390	0.950052	0.32	FGF17	-1.02059	-5.33592	-0.631047	61743927	FGF17	GGAGGTGGCTGTCCTCAAAATCTGCTTCTCGGATCTCCCTCAGTCTGCCC	NM_003867.2		0.49485
ILMN_1693483	0.925383	0.184	FGF18	1.37723	-4.95589	0.398852	4503694	FGF18	AGGTCGCCCTGGCCACACTCACACTCCCAGAAAACTGCATCAGAGGAATA	NM_003862.1		0.735182
ILMN_1797030	0.950052	0.479	FGF18	0.721099	-5.57602	0.129667	4503694	FGF18	GTGTTTAAAAGAAGACAAAAACTGAACCAAAACTCTTGGGGGGAGGGGTG	NM_003862.1		0.319664
ILMN_1744693	0.950052	0.293	FGF2	-1.0799	-5.27953	-0.230423	153285460	FGF2	CGTGGCACCAGTGGATAGTGTGAGAGAATTAGGCTGTAGAACAAATGGCC	NM_002006.4		0.533132
ILMN_2105919	0.996685	0.984	FGF2	-0.0199708	-5.82181	-0.00295573	41352694	FGF2	TTGGGGGAGCTGGTAACTGATGAAATCTTTTCCCACCTTTTCTCTTCAGG	NM_002006.3		0.0070049
ILMN_1788232	0.950052	0.53	FGF20	-0.639638	-5.62789	-0.167819	9789946	FGF20	GAATTCATCAGTGTGGCAGTGGGACTGGTCAGTATTAGAGGTGTGGACAG	NM_019851.1		0.275724
ILMN_2153061	0.950052	0.598	FGF20	-0.535205	-5.68566	-0.171286	9789946	FGF20	TCAGTGTGGCAGTGGGACTGGTCAGTATTAGAGGTGTGGACAGTGGTCTC	NM_019851.1		0.223299
ILMN_2056569	0.950052	0.399	FGF21	0.861764	-5.47274	0.151398	68215584	FGF21	ATACAATGTTTACCAGTCCGAAGCCCACGGCCTCCCGCTGCACCTGCCAG	NM_019113.2		0.399027
ILMN_1772789	0.950195	0.621	FGF21	0.50229	-5.7018	0.0965891	68215584	FGF21	CGCTGCTGACCAGAGCCCCGAAAGTCTCCTGCAGCTGAAAGCCTTGAAGC	NM_019113.2		0.206908
ILMN_2095633	0.950408	0.626	FGF22	0.495067	-5.70521	0.0880159	10190671	FGF22	AGGTTCCGGGAGCGCATCGAAGAGAACGGCCACAACACCTACGCCTCACA	NM_020637.1		0.203426
ILMN_1696488	0.950052	0.342	FGF23	0.973388	-5.37876	0.182529	15055547	FGF23	CTTACCCCATTACTGCGGTTCTTCCTGTAAGGGGGCTCCATTTTCCTCCC	NM_020638.2		0.465974
ILMN_2071316	0.950052	0.55	FGF23	0.607495	-5.64672	0.115466	15055547	FGF23	CTCAACACTACCATCAGGGGTTTTCTTTATGGCAAAGCCAAAATAGCTCC	NM_020638.2		0.259637
ILMN_1723227	0.950052	0.42	FGF3	0.82311	-5.50282	0.148468	15451899	FGF3	TTGAGCCCTTGCCCCTGCGTCCCGCGTCTGGGTTCTCAGCTATTTCCAGA	NM_005247.2		0.376751
ILMN_1677456	0.950052	0.406	FGF4	0.849605	-5.48234	0.150027	4503700	FGF4	ATGGGAAGACCAAGAAGGGGAACCGAGTGTCGCCCACCATGAAGGTCACC	NM_002007.1		0.391474
ILMN_1740871	0.950052	0.52	FGF5	-0.654263	-5.61901	-0.304765	73486654	FGF5	GCTGTGTCTCAGGGGATTGTAGGAATACGAGGAGTTTTCAGCAACAAATT	NM_004464.3		0.283997
ILMN_2399100	0.965402	0.805	FGF5	0.249565	-5.79218	0.0387114	73486656	FGF5	GTCTCAGGGGAGAAAAGGGAACAAGATGCTGATCCAACCTGAGTGGAGTC	NM_033143.2		0.0942041
ILMN_2188091	0.950052	0.491	FGF6	0.701027	-5.58935	0.125785	10337586	FGF6	AATACGGACGGGTAAAGCGGGGCAGCAAGGTGTCCCCGATCATGACTGTC	NM_020996.1		0.308919
ILMN_1764605	0.950052	0.527	FGF6	0.643001	-5.62586	0.124661	10337586	FGF6	TAGCTGGAGAGATTGCCGGGGTGAACTGGGAAAGTGGCTATTTGGTGGGG	NM_020996.1		0.278189
ILMN_1731240	0.997591	0.987	FGF7	0.0166336	-5.82187	0.0070358	15147344	FGF7	CGCAGCTGGGTAGATATACAGCTGTCACAAGAGTCTAGATCAGTTAGCAC	NM_002009.2		0.00568285
ILMN_2345749	0.950052	0.37	FGF8	0.917675	-5.42697	0.174349	15147351	FGF8	GGAGAACAACTACACAGCGCTGCAGAATGCCAAGTACGAGGGCTGGTACA	NM_006119.2		0.431798
ILMN_1812517	0.950925	0.649	FGF8	0.461542	-5.72041	0.0806197	15147347	FGF8	GCCAGACCGCAGAGAGGCTCATCCTGTAGGGCACCCAAAACTCAAGCAAG	NM_033164.1		0.187755
ILMN_1762531	0.950052	0.343	FGF9	-0.971505	-5.38044	-0.439606	4503706	FGF9	AGCTGCCATACTTCGACTTATCAGGATTCTGGCTGGTGGCCTGCGCGAGG	NM_002010.1		0.464706
ILMN_1785404	0.950052	0.359	FGFBP1	-0.938809	-5.40899	-0.389519	49574208	FGFBP1	CGATGTTCAGAGGCTGTTTCCTGCAGCATGTATTTCCATGGCCCACACAG	NM_005130.3		0.444906
ILMN_1686961	0.955042	0.699	FGFBP3	0.392813	-5.7483	0.103557	142373878	FGFBP3	TCCTCCCCACCTTCCTCCCATCCATTGTTGAATCTGTGGATGCAGAGCCC	NM_152429.3		0.155523
ILMN_1707612	0.950052	0.36	FIGF	0.9369	-5.41063	0.172855	19924297	FIGF	CAGATGCCTCTGCGCACCAAGGAATGGAGAGGAGGGGACCCATGTAATCC	NM_004469.2		0.443697
ILMN_2134130	0.950052	0.274	FLG	1.12475	-5.23503	0.203616	60097901	FLG	CCAAAGTGGCTATATCAACATCAGGGCTAGCACATCTTTCTCTATTATCC	NM_002016.1		0.562249
ILMN_1743715	0.950052	0.288	FLG2	1.09128	-5.26839	0.186992	148539589	FLG2	GAGGCTCTGAGGCCAGCGGTTACCATACAAAGGAAAGAACAGGCTCTGGT	NM_001014342.2		0.540608
ILMN_2233229	0.950052	0.57	FLG2	0.578172	-5.66309	0.105133	62122916	FLG2	GACAAATCTATCCAAGGAGCTAAATGACGTGGTTTAGGAGCCAAAACGTC	NM_001014342.1		0.244125
ILMN_1716246	0.950052	0.434	FRZB	-0.798476	-5.52133	-0.261495	38455387	FRZB	GCCTGATTGAGAAGCACAACTGAAACCAGTAGCCGCTGGGGTGTTAATGG	NM_001463.2		0.36251
ILMN_1712896	0.950052	0.411	FST	0.840333	-5.48957	0.158933	7242223	FST	TGGCTGTATCAGAGGGCTTTGAAAACATACACTGAGCTGCTTCTGCGCTG	NM_006350.2		0.386158
ILMN_1700081	0.950052	0.517	FST	-0.660235	-5.61533	-0.347067	7242221	FST	AGAGGCCGGTGTTCCCTCTGTGATGAGCTGTGCCCTGACAGTAAGTCGGA	NM_013409.1		0.286509
ILMN_2201678	0.950052	0.463	FSTL1	-0.747877	-5.55768	-0.400728	34304366	FSTL1	ACTAGGTTTGGTTCCTTCAGCCCTCTAAAAGCATAGGGCTTAGCCTGCAG	NM_007085.3		0.334419
ILMN_1730670	0.950052	0.45	FSTL3	-0.769899	-5.54213	-0.372903	95104789	FSTL3	GTGCCTGCGTGTAAACCACAGCCTCAGACCAGCTATGGGGAGAGGACAAC	NM_005860.2		0.346787
ILMN_1685319	0.950052	0.555	GDF1	0.599692	-5.65115	0.112414	110349791	GDF1	CGGGGCCCGAGCCCATGCCGAGCTACGCGCAGCTAGTGCAGCGCGGCTGG	NM_001492.4		0.255707
ILMN_1662280	0.950925	0.642	GDF1	0.471705	-5.71591	0.0818163	110349791	GDF1	CCCTCCGGGGACACCGGCCCCGCCCTCAGCCCACTGGTCCCGGGCCGCCG	NM_001492.4		0.192465
ILMN_1728642	0.97554	0.865	GDF1	0.17261	-5.80772	0.0315088	110349791	GDF1	ACCGCCCTGCGCTCCGCGGCCACTGCGCGCCTCTTTCGGCCCCTGGCGAA	NM_001492.4		0.0629839
ILMN_1678191	0.955042	0.71	GDF10	0.376748	-5.75418	0.067845	11641417	GDF10	GGGCGCTCGCTCCCTGCACACGGAAAGAACTCTGTTTAAATGCTCAGTTC	NM_004962.2		0.148742
ILMN_1745132	0.962929	0.788	GDF11	0.272048	-5.78657	0.0605884	11641418	GDF11	ATGGTGGTGGATCGCTGTGGCTGCTCTTAAGGTGGGGGATAGAGGATGCC	NM_005811.2		0.103474
ILMN_2188862	0.886496	0.131	GDF15	1.57551	-4.70487	0.980607	4758935	GDF15	CCGGGGTGTCGCTCCAGACCTATGATGACTTGTTAGCCAAAGACTGCCAC	NM_004864.1		0.882729
ILMN_1760363	0.950052	0.346	GDF2	0.96421	-5.38688	0.145611	7705307	GDF2	CACTGCAGAGACTGATGGAAGTTAGAGAGGTGGAGGAGGCCAGCTCGCTC	NM_016204.1		0.460924
ILMN_2210111	0.974276	0.86	GDF3	-0.178301	-5.80677	-0.0329924	10190669	GDF3	TTTCATGCAAGCCCTGATGCATGCCGTTGACCCAGAGATCCCCCAGGCTG	NM_020634.1		0.0655015
ILMN_1796471	0.950052	0.446	GDF5	-0.777169	-5.53691	-0.365084	5123452	GDF5	AGACTCAGCCCACCATTTCTCCTCACCTGGGCCTTCTCAGCCTCTGGACT	NM_000557.2		0.350665
ILMN_2150175	0.956262	0.734	GDF6	-0.344977	-5.7651	-0.0749907	48475061	GDF6	AGGTGACTGAAAGTGCAAAGAGGAAATGGACAGCATGCAATTCATCCTAA	NM_001001557.1		0.134304
ILMN_1757441	0.95755	0.753	GDF6	0.318943	-5.77334	0.0594063	48475061	GDF6	TGCTTGTTTGGTTCAGAGAACTACAAACTGTCAAAGAAAGGGTGGGGATG	NM_001001557.1		0.123205
ILMN_1803881	0.950052	0.559	GDF7	0.59445	-5.6541	0.409869	61835231	GDF7	AACCATGCCATCATTCAGACGCTGCTCAACTCCATGGCACCAGACGCGGC	NM_182828.2		0.252588
ILMN_1738783	0.950052	0.335	GDF9	0.987814	-5.36586	0.181839	98985826	GDF9	GTGGCTCCGCACAGGTACAACCCTCGATACTGTAAAGGGGACTGTCCAAG	NM_005260.3		0.474955
ILMN_1674882	0.950052	0.333	GDNF	0.990861	-5.36312	0.48324	40549410	GDNF	CGGGCCAAAAGTCTCCAAGTCCCTGCTAACTTCTTGCTCTCGCAACAGAA	NM_199231.1		0.477556
ILMN_1705019	0.950052	0.335	GDNF	0.988088	-5.36562	0.182181	40549412	GDNF	GATAACCTGGTTTACCATATTCTAAGAAAGCATTCCGCTAAAAGGTGTGG	NM_199234.1		0.474955
ILMN_1662492	0.965017	0.802	GDNF	-0.253551	-5.79122	-0.0573227	40549401	GDNF	GGATGGGTCTCCTGGCTGGGACTTGGGGCACCTGGAGTTAATGTCCAACC	NM_000514.2		0.0958256
ILMN_2121408	0.615133	0.0214	HBEGF	2.49512	-3.25167	1.47567	4503412	HBEGF	CTGGTGCTACTCCATGCAGGGGTCAGTGCAGCAGAGGACAGTCTGGAGAA	NM_001945.1		1.66959
ILMN_1732705	0.974252	0.86	HCFC1	-0.178479	-5.80674	-0.0534421	98986456	HCFC1	TGTTTCTGAGGAGAGTACACCGTTCACTATTGTAGAGTAACCCCTGTGAC	NM_005334.2		0.0655015
ILMN_1674297	0.955042	0.7	HCFC2	-0.39082	-5.74904	-0.0951662	7019404	HCFC2	GGACCAGCTACACAAGTTCGGTGGCTTCAAGGTAACAATAAGAAAGCACC	NM_013320.1		0.154902
ILMN_1801586	0.950052	0.392	HGF	-0.87408	-5.46288	-0.24724	58533168	HGF	ACAAGGGAACAGTATCTATCACTAAGAGTGGCATCAAATGTCAGCCCTGG	NM_000601.4		0.406714
ILMN_1790149	0.950052	0.499	HGF	-0.688144	-5.59771	-0.274659	58533169	HGF	ATCCGCCAGCCCGTCCAGCAGCACCATGTGGGTGACCAAACTCCTGCCAG	NM_001010932.1		0.301899
ILMN_1757838	0.950052	0.519	HGF	0.65655	-5.61761	0.110313	58533166	HGF	TTGTTAGGATTTTGGAGTATTTGGGGAGGGGGACTACTGGAATGCTGTCC	NM_001010934.1		0.284833
ILMN_1701468	0.626953	0.0244	HGFAC	2.43337	-3.36105	0.595099	32455241	HGFAC	CCTGGCCTGCGAGAAGAACGGCGTGGCTTACCTCTACGGCATCATCAGCT	NM_001528.2		1.61261
ILMN_1675453	0.605711	0.019	HHIP	-2.55091	-3.15173	-0.712068	20143972	HHIP	CCTCAATGTGAACAAGTGGACAGAAACATCCGCAGAGTGACCAGGGCAGG	NM_022475.1		1.72125
ILMN_2204215	0.95755	0.755	HHIP	-0.31612	-5.7742	-0.0723309	20143972	HHIP	CCAGTTACAGAATGCTACACACTTACCTTTTTATTGGCTGAGAAATCTGG	NM_022475.1		0.122053
ILMN_1687510	0.950052	0.448	HRNR	0.773973	-5.53921	0.149608	57864581	HRNR	GTGGCCGACATGGGTCTGGCTCAGGTCAGTCTTCTGGATTTGGTCACCAC	NM_001009931.1		0.348722
ILMN_1688663	0.951635	0.657	IFNA1	0.450796	-5.72506	0.086814	13128949	IFNA1	AACGTCATGTGCACCTTTACACTGTGGTTAGTGTAATAAAACATGTTCCT	NM_024013.1		0.182435
ILMN_2193942	0.950052	0.52	IFNA13	0.654801	-5.61868	0.127703	13128965	IFNA13	ATCAACAAACTTGCAAGAAAGATTAAGGAGGAAGGAATAACACCTGGTCC	NM_006900.2		0.283997
ILMN_2129202	0.950052	0.269	IFNA14	1.13635	-5.22326	0.209052	4504590	IFNA14	TTACCTGTGCAGGCACTAGTCCTTTACAGATGACCATTCTGATGTCTCCT	NM_002172.1		0.570248
ILMN_1733136	0.950925	0.649	IFNA16	0.462688	-5.7199	0.0817889	141802732	IFNA16	GTGCAGGCACTAGTCCTTTACAGATGACCATGCTGATGTCTCTATTCATC	NM_002173.2		0.187755
ILMN_1698186	0.996621	0.983	IFNA2	-0.0219686	-5.82177	-0.00707621	11067750	IFNA2	CAGCTCTTAAGGCACTAGTCCCTTACAGAGGACCATGCTGACTGATCCAT	NM_000605.2		0.00744648
ILMN_2202096	0.950052	0.575	IFNA4	0.569713	-5.66766	0.0999512	10835102	IFNA4	GTTTTCAGCAGTGTGAAGAAGCTTGGTGTATACCTTGCAGGCACTAGTCC	NM_021068.1		0.240332
ILMN_1660195	0.931416	0.195	IFNA5	1.33983	-5.00021	0.273365	4504596	IFNA5	GCCTGTATGATGCAGGAGGTTGGAGTGGAAGACACTCCTCTGATGAATGT	NM_002169.1		0.709965
ILMN_1684538	0.950052	0.438	IFNA6	0.791421	-5.52653	0.150692	11128014	IFNA6	CTCATCTGTTGCTTGGGATGAGAGGCTTCTAGACAAACTCTATACTGAAC	NM_021002.1		0.358526
ILMN_2186745	0.953688	0.675	IFNA7	0.425487	-5.73559	0.0789508	71143134	IFNA7	GGAGGTTGGGGTGGAAGAGACTCCCCTGATGAATGAGGACTTCATCCTGG	NM_021057.2		0.170696
ILMN_1682245	0.950052	0.531	IFNB1	0.63706	-5.62943	0.117702	50593016	IFNB1	GGTTACCTCCGAAACTGAAGATCTCCTAGCCTGTGCCTCTGGGACTGGAC	NM_002176.2		0.274905
ILMN_3245702	0.950052	0.306	IFNE	-1.05066	-5.30769	-0.362738	219555683	IFNE	CTACAGAGTTTAGAAGCCCGAGGTAGGTGGAGGGACTAGAGGACTTCTCC	NM_176891.4		0.514279
ILMN_2207291	0.965439	0.807	IFNG	-0.247972	-5.79256	-0.0675866	56786137	IFNG	CTATCCAGTTACTGCCGGTTTGAAAATATGCCTGCAATCTGAGCCAGTGC	NM_000619.2		0.0931265
ILMN_1676704	0.956677	0.744	IFNK	0.330541	-5.76975	0.0560902	112789563	IFNK	CAGTGACTGTGCCTGGGAGATTGTCCGAGTGGAAATCAGAAGATGTTTGT	NM_020124.2		0.128427
ILMN_1709613	0.950052	0.365	IGF1	0.925888	-5.42003	0.38354	19923111	IGF1	GAGGCCCAGGGGATTTTTGAAGCTGTCTTTATTCTGCCCCCATCCCAACC	NM_000618.2		0.437707
ILMN_2056087	0.950052	0.517	IGF1	-0.658953	-5.61612	-0.241622	19923111	IGF1	TCCCCTGCTACTTTGAAACCAGAAAATAATGACTGGCCATTCGTTACATC	NM_000618.2		0.286509
ILMN_2413956	0.950052	0.29	IGF2	1.08725	-5.27234	0.408017	109148515	IGF2	AGACACCAATGGGAATCCCAATGGGGAAGTCGATGCTGGTGCTTCTCACC	NM_001007139.3		0.537602
ILMN_2298035	0.950052	0.564	IGF2	0.587093	-5.65819	0.106738	109148515	IGF2	GGCCAGAGAGCCCAGTCCTGAGGTGAGCTGCTGTGGCCTGTGGCCCAGGC	NM_001007139.3		0.248721
ILMN_1801953	0.950052	0.6	IHH	-0.532062	-5.68724	-0.275598	119392085	IHH	GCTCACAAAGCATGGGACACTGGTGGTGGAGGATGTGGTGGCATCCTGCT	NM_002181.2		0.221849
ILMN_2073307	0.364115	0.00404	IL10	-3.24281	-1.84416	-1.52838	24430216	IL10	GGAAGTTGCAGTGAGCTGATATCATGCCCCTGTACTCCAGCCTGGGTGAC	NM_000572.2		2.39362
ILMN_1674167	0.950052	0.444	IL10	0.781525	-5.53375	0.161021	24430216	IL10	GGAAGAGAAACCAGGGAGCCCCTTTGATGATTAATTCACCTTCCAGTGTC	NM_000572.2		0.352617
ILMN_1788107	0.950052	0.518	IL11	-0.658682	-5.61629	-0.231399	24430217	IL11	GAGCAGGGACTGTCATTCAGGGAGGCTAAGGAGAGAGGCTTGCTTGGGAT	NM_000641.2		0.28567
ILMN_1671353	0.950052	0.56	IL12A	0.592503	-5.65519	0.108579	24430218	IL12A	GAGCTATCTGAATGCTTCCTAAAAAGCGAGGTCCCTCCAAACCGTTGTCA	NM_000882.2		0.251812
ILMN_1681132	0.966283	0.811	IL12B	0.242808	-5.79377	0.0470324	24497437	IL12B	GGACAAGTAGTTATGGCTAAGGACATGAAATTGTCAGAATGGCAGGTGGC	NM_002187.2		0.0909791
ILMN_2052511	0.950052	0.413	IL13	0.835794	-5.49309	0.152483	26787977	IL13	CAAGGGTTCAGAGACTCAGGGCCCCAGCACTAAAGCAGTGGACACCAGGA	NM_002188.2		0.38405
ILMN_2369221	0.950052	0.499	IL15	-0.688437	-5.59752	-0.235864	26787983	IL15	GGCCATGTGGCTCTTTGGAGCAATGTTCCATCATGTTCCATGCTGCTGAC	NM_172174.1		0.301899
ILMN_2273053	0.950052	0.512	IL15	-0.666801	-5.61125	-0.246756	26787983	IL15	GCCCTGAGGGCTGAGTTCTGCACCCAGTCAAGCTCAGGAAGGCCAAGAAA	NM_172174.1		0.29073
ILMN_1724181	0.965439	0.806	IL15	0.249226	-5.79226	0.0738314	26787979	IL15	TTGGTGGGGCTGGGTACCAATGCTGCAGGTCAACAGCTATGCTGGTAGGC	NM_000585.2		0.093665
ILMN_2290628	0.960512	0.777	IL16	0.287156	-5.78254	0.140716	27262656	IL16	CAAGCAAGCTCCCAAGGGATGGTGCCCTGTTCTCTACCAAGCTATCCTGG	NM_172217.1		0.109579
ILMN_1813572	0.978118	0.879	IL16	0.153844	-5.81066	0.0266332	148833503	IL16	GCCCAAGGGAAAGAAAAGGAAGGCTCTTCTCCCCAGAGTTCCCCATGCAG	NM_172217.2		0.0560111
ILMN_1774983	0.950052	0.459	IL17A	0.754864	-5.5528	0.129315	27477085	IL17A	TCCAAGTTCTCGATTTCACATGCCTTCAAGACTGAACACCGACTAAGGTT	NM_002190.2		0.338187
ILMN_1766707	0.950052	0.537	IL17B	0.627397	-5.63517	0.244846	27477077	IL17B	GGAGACCATCGCTGTGGGCTGCACCTGCATCTTCTGAATCACCTGGCCCA	NM_014443.2		0.270026
ILMN_1788109	0.99416	0.971	IL17C	-0.0371895	-5.82134	-0.0161377	27477078	IL17C	TGCCTGTACCTTGGCTCCCTGTCCTGCTCCCGGCTTCCCTTACCCTATCA	NM_013278.3		0.0127808
ILMN_1753823	0.995373	0.976	IL17D	0.0301662	-5.82157	0.0133077	19923714	IL17D	CTGCAGAGATCAATCTGGAGGCTTCTGTTTCTGCATTCTGCCACGAGAGC	NM_138284.1		0.0105502
ILMN_2188247	0.950052	0.444	IL17F	0.780648	-5.53439	0.145989	57863305	IL17F	TCTCCATGAATTCCGTTCCCATCCAGCAAGAGACCCTGGTCGTCCGGAGG	NM_052872.3		0.352617
ILMN_1778457	0.950052	0.553	IL18	-0.604003	-5.64871	-0.155764	27502389	IL18	TGTGGTGAGCCGAGATTGCACCATTGCGCTCTAGCCTGGGCAACAACAGC	NM_001562.2		0.257275
ILMN_1799575	0.904949	0.148	IL19	-1.50326	-4.79939	-0.279211	30795207	IL19	CCTGCAGGCCATCCTGGGAGTAAAGGGCTGCCTTCCCATCTAATTTATTG	NM_013371.2		0.829738
ILMN_1682592	0.950052	0.614	IL19	-0.51286	-5.69672	-0.156305	30795207	IL19	GAGAGCACTGAGAGGAGACACAAGGAGCAGCCCGCAAGCACCAAGTGAGA	NM_013371.2		0.211832
ILMN_1658483	0.950052	0.612	IL1A	0.515733	-5.69533	0.096568	27894329	IL1A	CAGGGCATTTTGGTCCAAGTTGTGCTTATCCCATAGCCAGGAAACTCTGC	NM_000575.3		0.213249
ILMN_1775501	0.738359	0.0471	IL1B	2.11483	-3.90189	1.46107	27894305	IL1B	CTCACCTCTCCTACTCACTTAAAGCCCGCCTGACAGAAACCACGGCCACA	NM_000576.2		1.32698
ILMN_1790556	0.95755	0.748	IL1F10	-0.325567	-5.77131	-0.147362	27894303	IL1F10	GAACAGAGCTGGTAGGGAGACAGGAAACTGCGTTTTAGCCTTGTGCCCCC	NM_032556.4		0.126098
ILMN_2359733	0.994422	0.971	IL1F10	0.0367359	-5.82135	0.00697852	27894306	IL1F10	CTCCGGAAGGAACACAGCTCTTGACACATGGATTTCAGCTCAGTGACACC	NM_173161.1		0.0127808
ILMN_1804901	0.950052	0.309	IL1F5	-1.04288	-5.31506	-0.551568	27894309	IL1F5	ATGATCCCTGTCTCCTCGTGTTTACATTCTGTGTGTGTCCCCTCCCACAA	NM_173170.1		0.510042
ILMN_1759141	0.950052	0.433	IL1F5	0.800024	-5.52018	0.150318	27894308	IL1F5	TCCTCCTCAGGTCCTGGCAGTTTCAGGGCCCCTCCCTAGGCCTTACTTAA	NM_012275.2		0.363512
ILMN_1704000	0.950052	0.266	IL1F6	1.14377	-5.21568	0.232043	7657091	IL1F6	CGCTCATAGCAGTCCCGAGGAAGGACCGTATGTCTCCAGTCACTATTGCC	NM_014440.1		0.575118
ILMN_1754002	0.950052	0.351	IL1F8	0.954017	-5.39582	0.167013	27894312	IL1F8	CCTAGGCTGTGGGTGGCTGGTTCCAGGATAGAGAATCAAGCTGTCAGAGT	NM_173178.1		0.454693
ILMN_1799519	0.955042	0.705	IL1F8	0.384319	-5.75144	0.0716749	27894311	IL1F8	AGATCTCTGTCTCTTCTGTGCAGAAATTCAGGGCAAGCCTACTTTGCAGC	NM_014438.3		0.151811
ILMN_1761927	0.969097	0.828	IL1F8	-0.220209	-5.79877	-0.0668167	27894311	IL1F8	CAGACAACATTGCTCCTGAATTCCCACAGAGCAGCAAGCTACTAGAGCTC	NM_014438.3		0.0819697
ILMN_2158713	0.950052	0.563	IL1F9	0.588822	-5.65723	0.0990589	27894314	IL1F9	GAGCTGGGTGGTATAAGGCTGTCCTCTCAAGCTGGTGCTGTGTAGGCCAC	NM_019618.2		0.249492
ILMN_1774874	0.705772	0.0389	IL1RN	2.20916	-3.74614	0.564389	27894320	IL1RN	GGCACTTGGAGACTTGTATGAAAGATGGCTGTGCCTCTGCCTGTCTCCCC	NM_173843.1		1.41005
ILMN_1806249	0.950052	0.503	IL1RN	0.682358	-5.60142	0.126968	27894320	IL1RN	GCTAACCCATAAACTGCTGGGGCAAAAATCATCTTGGAAGGCTCTGAACC	NM_173843.1		0.298432
ILMN_1689734	0.950052	0.601	IL1RN	0.530843	-5.68785	0.196965	27894318	IL1RN	CAGAGGCCTCCGCAGTCACCTAATCACTCTCCTCCTCTTCCTGTTCCATT	NM_173842.1		0.221126
ILMN_1704321	0.952793	0.665	IL2	0.439021	-5.73003	0.0863529	125661059	IL2	CCAGGATGCTCACATTTAAGTTTTACATGCCCAAGAAGGCCACAGAACTG	NM_000586.3		0.177178
ILMN_3248857	0.950052	0.54	IL20	0.623242	-5.63761	0.115335	50845426	IL20	CCTGCAGAGGAGGCATGACCCCAAACCACCATCTCTTTACTGTACTAGTC	NM_018724.3		0.267606
ILMN_2100046	0.950052	0.522	IL22	0.652261	-5.62024	0.107549	41393566	IL22	GGCCAGGCTCAGCAACAGGCTAAGCACATGTCATATTGAAGGTGATGACC	NM_020525.4		0.282329
ILMN_1735208	0.95493	0.685	IL22	0.411766	-5.74104	0.0743929	41393566	IL22	AGTGCTGTTCCCTCAATCTGATAGGTTCCAGCCTTATATGCAGGAGGTGG	NM_020525.4		0.164309
ILMN_1715603	0.969427	0.83	IL23A	-0.216854	-5.79947	-0.125282	28144902	IL23A	GAGTCCCTAAAGGCAGCAGCTCAAGGATGGCACTCAGATCTCCATGGCCC	NM_016584.2		0.0809219
ILMN_1774685	0.950052	0.566	IL24	-0.584268	-5.65975	-0.476808	31317247	IL24	CCACTTGAGTGTCAAGCTGACCTTGCTGATGGTGACATTGCACCTGGATG	NM_006850.2		0.247184
ILMN_2407799	0.966817	0.813	IL24	0.23963	-5.7945	0.045819	31317245	IL24	GCATGAAAATCACACTGTCTTCTGATATCTGCAGGGACAGAGCATTGGGG	NM_181339.1		0.0899095
ILMN_1725814	0.970297	0.839	IL24	0.205742	-5.80172	0.0386136	31317247	IL24	CAAAGCCTGTGGACTTTAGCCAGACCCTTCTGCCCTCCTTTGCTGGCGAC	NM_006850.2		0.076238
ILMN_1720243	0.950052	0.404	IL25	0.851758	-5.48065	0.158599	27477079	IL25	CCAGGGGGAGGGTGCAGATGAGGGAGCGACCCAGATTAGGTGAGGACAGT	NM_022789.2		0.393619
ILMN_2401884	0.950195	0.621	IL25	0.502661	-5.70162	0.0928481	27477080	IL25	CGGGACAGGATGGGGGGCTTTGGGGAAAGCCTGCACTTCTGCACATTTTG	NM_172314.1		0.206908
ILMN_2401883	0.995645	0.978	IL25	0.0282026	-5.82162	0.00793961	27477080	IL25	CTTAGGGCCGCCGGAAGCTGGTGTCCTGTCATTTTCTCTCAGGAAAGGTT	NM_172314.1		0.00966115
ILMN_1766320	0.950052	0.516	IL3	0.661636	-5.61446	0.114278	28416914	IL3	GAGCCTCGCGATCTTTTGAGTCCAACGTCCAGCTCGTTCTCTGGGCCTTC	NM_000588.3		0.28735
ILMN_1713686	0.219766	0.00106	IL34	-3.82076	-0.69658	-1.65171	22748956	IL34	ACAGCAGGGCTCAGCTTCCTGCCTTCCATAGCTGTCATGGCCTCACCTGG	NM_152456.1		2.97469
ILMN_1669174	0.950052	0.527	IL4	0.644255	-5.62511	0.114457	27477091	IL4	GCACAGCAGTTCCACAGGCACAAGCAGCTGATCCGATTCCTGAAACGGCT	NM_172348.1		0.278189
ILMN_2389080	0.950408	0.628	IL4	0.492223	-5.70654	0.0862808	27477090	IL4	CTCCTGGAAGAGAGGTGCTGATTGGCCCCAAGTGACTGACAATCTGGTGT	NM_000589.2		0.20204
ILMN_2207190	0.979702	0.886	IL5	-0.145394	-5.81187	-0.0348335	28559032	IL5	GTGGAGAAGAAAGACGGAGAGTAAACCAATTCCTAGACTACCTGCAAGAG	NM_000879.2		0.0525663
ILMN_1709300	0.999529	0.996	IL5	-0.00496314	-5.82199	-0.00130353	28559032	IL5	CAGGGAATAGGCACACTGGAGAGTCAAACTGTGCAAGGGGGTACTGTGGA	NM_000879.2		0.00174066
ILMN_1699651	0.006505	6.65e-07	IL6	7.09941	5.37868	2.48055	10834983	IL6	TGCAGTCCAGCCTGAGGGCTCTTCGGCAAATGTAGCATGGGCACCTCAGA	NM_000600.1		6.17718
ILMN_1705769	0.956211	0.731	IL7	-0.348544	-5.76392	-0.127561	28610152	IL7	GGCCAGGTTAAAGGAAGAAAACCAGCTGCCCTGGGTGAAGCCCAACCAAC	NM_000880.2		0.136083
ILMN_2059744	0.964742	0.797	IL7	-0.260354	-5.78955	-0.0458865	28610152	IL7	GAGAGTCATAAACCTTAAGTAAGCAACAGCATAACAAGGTCCAAGATACC	NM_000880.2		0.0985417
ILMN_1653704	0.924455	0.179	IL9	1.39196	-4.93816	0.302618	10834979	IL9	TCAAGATGCTTCTGGCCATGGTCCTTACCTCTGCCCTGCTCCTGTGCTCC	NM_000590.1		0.747147
ILMN_2151676	0.950052	0.543	IL9	0.619177	-5.63998	0.109219	10834979	IL9	GGCATTCCCTCTGACAACTGCACCAGACCATGCTTCAGTGAGAGACTGTC	NM_000590.1		0.2652
ILMN_1756443	0.955042	0.709	INHA	-0.378898	-5.75341	-0.0804602	9257223	INHA	GCCACGCCCCCACCATCATCAGCTGGGAGGAAAGGCAGAGTTGGGAAATA	NM_002191.2		0.149354
ILMN_1719547	0.8046	0.0704	INHBA	-1.91003	-4.22548	-0.441871	62953137	INHBA	GGCTCAGAGATGAAGCAGTGAAAGAGACAGGAATTGGGAGGGAAAGGGAG	NM_002192.2		1.15243
ILMN_1685714	0.950052	0.242	INHBB	1.20425	-5.15229	0.345224	9257224	INHBB	CCGCCCGCATAGCACTTGCAGACCTGCCTGAACGCACATGACATAGCACT	NM_002193.1		0.616185
ILMN_1765986	0.99369	0.968	INHBC	-0.0408342	-5.8212	-0.0129916	15718678	INHBC	CTACTCAATGGTCCCCACTCCAAGATGAGTTGACACAACCCCTTCCCCCA	NM_005538.2		0.0141246
ILMN_1811767	0.99814	0.988	INHBE	-0.014745	-5.8219	-0.00260272	37622353	INHBE	CTTCAAGTGTACTCTGTAGGCTTCTGGGAGGTCCCTTTTCAGGGGTGTCC	NM_031479.3		0.00524306
ILMN_2226271	0.989586	0.943	INSL3	0.0724615	-5.81948	0.012037	38327534	INSL3	TGGGATGGGTGCTCACTATCTACCCCAGACCAATGCCACCTGCAGCCTGT	NM_005543.2		0.0254883
ILMN_2060578	0.956045	0.723	INSL5	-0.359288	-5.7603	-0.062438	38569232	INSL5	GGGGAAGACCGTCTTTGGGGTGGACAGATGCCCACTGAAGAGCTTTGGAA	NM_005478.3		0.140862
ILMN_2081673	0.950052	0.537	INSL6	0.628689	-5.63441	0.118029	38569395	INSL6	AAGGTCGAAGCCTACAGCCCATACCAGTTCGAAAGCCCGCAAACCGCTTC	NM_007179.2		0.270026
ILMN_1724254	0.950925	0.647	INSL6	-0.465007	-5.71888	-0.146764	38569395	INSL6	CGGTTGATTGCACAGGCCTCGGAGAAGGTCGAAGCCTACAGCCCATACCA	NM_007179.2		0.189096
ILMN_3239288	0.950052	0.347	ISM1	0.96189	-5.38892	0.194399	153791191	ISM1	CACCCGGATCCAGAGTTTCAAAGAGAGGCAAAGGGGGAAAGAGACTGAGG	NM_080826.1		0.459671
ILMN_3269849	0.950052	0.259	ISM2	-1.16121	-5.19769	-0.612958	218777843	ISM2	CACAAGAGCCACCAAAAGTTAGGGGACTTCAGTCCTAGCCCCCAGATGGC	NM_182509.3		0.5867
ILMN_1660317	0.950052	0.323	LEFTY1	1.01365	-5.34234	0.507806	27436943	LEFTY1	CAGGAGAGCTGGCGATGACTGAACTGCTGATGGACAAATGCTCTGTGCTC	NM_020997.2		0.490797
ILMN_1781256	0.950052	0.372	LEFTY2	0.912493	-5.43132	0.199357	27436880	LEFTY2	CCTACCCCTGCCCACTCCTCTGGAGACTGAGCCTTGCCCGTGCATATTTA	NM_003240.2		0.429457
ILMN_2207505	0.523205	0.012	LEP	-2.75878	-2.77088	-0.841885	4557714	LEP	CGGGAGGCTGAGACAGGAGAATCGCTTAAACCTGGGAGGCGGAGAGTACA	NM_000230.1		1.92082
ILMN_2207504	0.883104	0.126	LEP	1.59689	-4.67626	0.777042	4557714	LEP	GCCTGCAGAGAGAAGCCTGTTTTGTTGGAAGGTTTGGTGTGTGGAGATGC	NM_000230.1		0.899629
ILMN_1738725	0.803797	0.0701	LIF	1.91265	-4.22148	0.700946	6006018	LIF	ATCGTCCCCATCGTCCTCCTTGTCCCTGACTTGGGGCACTTCCACCCTGA	NM_002309.2		1.15428
ILMN_1795464	0.851733	0.1	LTA	-1.72281	-4.50191	-0.930784	6806892	LTA	AGAGCCCCACACGGAGGCATCTGCACCCTCGATGAAGCCCAATAAACCTC	NM_000595.2		1
ILMN_2376205	0.336254	0.00309	LTB	-3.35923	-1.61537	-1.49866	4505034	LTB	CCCGGACGCCCAGGACCCCATGGCAGTGGGAAAAATGTAGGAGACTGTTT	NM_002341.1		2.51004
ILMN_2376204	0.950052	0.263	LTB	-1.15142	-5.20781	-0.41831	4505034	LTB	TCCGGAGGGGCGAGAGGGTGTACGTCAACATCAGTCACCCCGATATGGTG	NM_002341.1		0.580044
ILMN_2349393	0.950052	0.241	MDK	-1.20696	-5.14939	-0.633071	59894791	MDK	AAAGGACTAGACGCCAAGCCTGGATGCCAAGGAGCCCCTGGTGTCACATG	NM_001012334.1		0.617983
ILMN_1706440	0.950052	0.415	MDK	0.831835	-5.49614	0.161218	59894794	MDK	AGACCGGTTCTGGAGACAAAAGGGGCCGCGGCGGCCGGAGCGGGACGGGC	NM_002391.3		0.381952
ILMN_2261876	0.950052	0.604	MDK	-0.527382	-5.68958	-0.357654	59894791	MDK	CACTGGGCGACCGCACCCGTGGCTTTCTCTGGGCGACCGGGTCCCAGACT	NM_001012334.1		0.218963
ILMN_1659142	0.956072	0.726	MDK	0.355072	-5.76173	0.0612574	59894795	MDK	GTCTGAGCTGCGTCCTGGGCTCGAGGCGTCCCCCGGGGAGTCGCCTCTTA	NM_001012333.1		0.139063
ILMN_1723087	0.980477	0.888	MDK	-0.142198	-5.81231	-0.0273481	59894791	MDK	CCACCCCTAAGTGCCCAAAGTGGGGAGGGACAAGGGATTCTGGGAAGCTT	NM_001012334.1		0.051587
ILMN_1652306	0.948353	0.218	MEGF10	1.27027	-5.07993	0.202245	14192942	MEGF10	GGACTCCAAGGGGCCACTGCCATCCCTTCCTGTGTGCTCTTTTTGACAAG	NM_032446.1		0.661544
ILMN_2146389	0.996621	0.984	MEGF10	0.0208825	-5.82179	0.00381165	14192942	MEGF10	ACTGCCCGTTTAGAGTCCTGTTAATATTGATGTCCTAACACTGGGTCTGC	NM_032446.1		0.0070049
ILMN_1787179	0.876257	0.115	MEGF11	-1.64731	-4.60761	-0.591406	14192940	MEGF11	GGCAGAGGGTGTGATTATGGTGACAATAGCTGCCTTCCCCTATCGAACAG	NM_032445.1		0.939302
ILMN_3241441	0.950052	0.605	MEGF6	0.525303	-5.69062	0.264645	110347456	MEGF6	CCCGCTCAGTGAAGACACAGTGTTCAGCTACGGAAGCCATAAGGCAGGCC	NM_001409.3		0.218245
ILMN_2059996	0.950052	0.297	MEGF8	-1.07153	-5.28766	-0.271198	46195706	MEGF8	ATCAAGTGTGAGGAGATGAGGCTGGGGATAGTCAGGGGCTGGATCACCCA	NM_001410.1		0.527244
ILMN_1714181	0.953566	0.673	MEGF8	-0.427901	-5.73461	-0.0810118	145701024	MEGF8	TGTTGTGGGGGAGCCTCAGAGGGGACAAAACCTCTGCCTGAGATCCCACC	NM_001410.2		0.171985
ILMN_1658798	0.872727	0.113	MEGF9	1.65798	-4.59289	0.84796	122937439	MEGF9	GGCTCTGTCAGCCATGTGACTGTAGTCCACATGGAGCTCTCAGCATACCG	NM_001080497.1		0.946922
ILMN_2290118	0.975727	0.868	MEGF9	-0.168319	-5.80842	-0.0668809	122937439	MEGF9	GCAGCCCTAGAAAGTAAGCCCAGGGCTTCAGATCTAAGTTAGTCCAAAAG	NM_001080497.1		0.0614803
ILMN_1780516	0.956072	0.729	MSTN	0.351936	-5.76279	0.153266	149408158	MSTN	CCATGCCAACGGTGCTAATACGATAGGCTGAATGTCTGAGGCTACCAGGT	NM_005259.2		0.137272
ILMN_1716608	0.856688	0.104	NGF	1.70462	-4.52768	0.351668	70995318	NGF	GTACCACGACTCACACCTTTGTCAAGGCGCTGACCATGGATGGCAAGCAG	NM_002506.2		0.982967
ILMN_1712537	0.950052	0.231	NODAL	1.23599	-5.11791	0.261448	38176152	NODAL	GCTTTCATGTATTCTCCAAAGTAGTCTGTGTGTGACCTGTCCCCCTCCCC	NM_018055.3		0.636388
ILMN_1737252	0.950052	0.225	NRG1	-1.25209	-5.10018	-0.527657	116006966	NRG1	CTACATCCACCACTGGGACAAGCCATCTTGTAAAATGTGCGGAGAAGGAG	NM_013962.2		0.647817
ILMN_1731788	0.950052	0.322	NRG1	1.0149	-5.34118	0.603289	116006960	NRG1	CCTTCACCCACCCGGAACCCTGAGGTGAGAACGCCCAAGTCAGCAACTCA	NM_013959.2		0.492144
ILMN_1811954	0.950052	0.465	NRG1	0.744551	-5.55999	0.135384	116006961	NRG1	CAAGGCACACAGATCCAAATGCATGCAGATCCAGCTATCAGCAACTCATC	NM_013960.2		0.332547
ILMN_2298888	0.950052	0.494	NRG1	0.696212	-5.59249	0.134113	116006966	NRG1	CGCGCCGCGGTGGTGATCGAGGGAAAGGTGCACCCGCAGCGGCGGCAGCA	NM_013962.2		0.306273
ILMN_1657607	0.950052	0.558	NRG1	0.596111	-5.65317	0.104712	4758525	NRG1	GTGATCACCTGCCAAATGAATAAGACAACAAAGAGAAGCAGAAGGGCAAG	NM_004495.1		0.253366
ILMN_2337880	0.910426	0.155	NRG2	-1.47642	-4.83363	-0.712651	7669531	NRG2	AGGACTTACTACTCACTGGACAGCCACAGCACGCGGGCCAGCAGCAGACA	NM_013983.1		0.809668
ILMN_1742151	0.95755	0.756	NRG2	0.3147	-5.77462	0.0597511	7669535	NRG2	CGTCAATGGAGGCGTCTGCTACTACATCGAGGGCATCAACCAGCTCTCCT	NM_013985.1		0.121478
ILMN_1774945	0.950052	0.485	NRG3	-0.710869	-5.58286	-0.372722	66730480	NRG3	ACACAGCCTTTCTCCCCCTGAGTCCCACAGCCAAATCAGAACGAGAGGCG	NM_001010848.2		0.314258
ILMN_1804662	0.951635	0.658	NRG4	-0.449203	-5.72574	-0.266127	141801772	NRG4	CAACCTGGTAGAGACGAGCAGTACCAGTGCCCACCACAGTCATGAACAAC	NM_138573.2		0.181774
ILMN_1665319	0.950052	0.422	NRTN	0.819348	-5.50568	0.434238	46255055	NRTN	TACGAGGACGAGGTGTCCTTCCTGGACGCGCACAGCCGCTACCACACGGT	NM_004558.2		0.374688
ILMN_1809364	0.955159	0.714	NTF3	0.37168	-5.75598	0.170775	45359869	NTF3	CAGAGAACAATAAACTCGTGGGCTGGCGGTGGATACGGATAGACACGTCC	NM_002527.3		0.146302
ILMN_1737208	0.950052	0.405	NTF5	0.849815	-5.48217	0.154386	34328933	NTF5	GCCTGAGACCCATGCCCAGGAAAATAACAGAGCTGGATGCTGAGAGACCT	NM_006179.3		0.392545
ILMN_1780546	0.950052	0.495	OSM	0.695752	-5.59279	0.219147	28178862	OSM	GCTGCTCCCCCTGGTGGTGGATCCTGGAATTTTCTCACGCAGGAGCCATT	NM_020530.3		0.305395
ILMN_2342695	0.937141	0.202	PDGFA	-1.31903	-5.02442	-0.532029	77695918	PDGFA	GTGCGGTCTTTGTTCTCCTCCGTGAAAAACTGTGTCCGAGAACACTCGGG	NM_033023.3		0.694649
ILMN_1685982	0.950052	0.585	PDGFA	-0.554634	-5.67566	-0.297958	77695918	PDGFA	CTAAGGGATGGTACTGAATTTCGCCGCCACAGGAGACCGGCTGGAGCGCC	NM_033023.3		0.232844
ILMN_2394305	0.688695	0.0353	PDGFB	2.25661	-3.66634	1.03602	15451785	PDGFB	GGGACCTGCTCATCATATTCCAACCCAGCCACGACTGCCATGTAAGGTTG	NM_033016.1		1.45223
ILMN_1737695	0.868084	0.11	PDGFB	1.67064	-4.57532	1.09324	4505680	PDGFB	ATGAATCGCTGCTGGGCGCTCTTCCTGTCTCTCTGCTGCTACCTGCGTCT	NM_002608.1		0.958607
ILMN_1775822	0.950052	0.354	PDGFB	0.949679	-5.39959	0.417598	4505680	PDGFB	GGGAGGCAACACTGCTGTCCACATGACCTCCATTTCCCAAAGTCCTCTGC	NM_002608.1		0.450997
ILMN_1683023	0.950052	0.451	PDGFC	0.769397	-5.54249	0.175301	9994186	PDGFC	GATCCAGCCATTACTAACCTATTCCTTTTTTGGGGAAATCTGAGCCTAGC	NM_016205.1		0.345823
ILMN_1803094	0.950052	0.425	PDGFD	0.814189	-5.50958	0.308274	78190476	PDGFD	CCTTCCAGGCTGCAATAACCAGCAAGGTTTTCAGTTAAAGCCCTATCTGC	NM_033135.3		0.371611
ILMN_2376859	0.986749	0.927	PDGFD	0.0922025	-5.81793	0.052784	78190489	PDGFD	ACCAGTTTGGGTGACAGGGCTGGTAAAGTCCCAGTGTTAGATGAGTGACC	NM_025208.4		0.0329203
ILMN_1767037	0.956072	0.729	PF4	0.351717	-5.76286	0.0675212	4505732	PF4	AACTGTGAAAGAAACTTCTGATATTTGTGTTATCCTTATGATTTTAAATA	NM_002619.1		0.137272
ILMN_1809813	0.99024	0.947	PGF	0.067942	-5.81979	0.0430069	56676307	PGF	TAAGAGACACATACAGAGTGGGCCCCGGGCTGGAGAAAGAGCTGCCTGGA	NM_002632.4		0.02365
ILMN_1719986	0.951635	0.66	PIK3IP1	-0.447118	-5.72662	-0.192403	51317357	PIK3IP1	GCTCCTAGCCATAGAGCTTCCTTTCCAGAACCCTTCCACTGCCCAATGTG	NM_052880.3		0.180456
ILMN_1767281	0.950052	0.517	PPBP	0.659946	-5.61551	0.121533	41872408	PPBP	GAACCCATTGCAACCAAGTCGAAGTGATAGCCACACTGAAGGATGGGAGG	NM_002704.2		0.286509
ILMN_1809352	0.945288	0.214	PRL	1.28237	-5.06632	0.295887	141802236	PRL	TGAGATCTACCCTGTCTGGTCGGGACTTCCATCCCTGCAGATGGCTGATG	NM_000948.3		0.669586
ILMN_1789887	0.92732	0.192	PSPN	1.35006	-4.98818	0.515292	21614546	PSPN	TGTCTGGTCCATGCCAGCTGTGGAGCCTGACCCTGTCCGTGGCAGAGCTA	NM_004158.2		0.716699
ILMN_1813753	0.782467	0.0621	PTN	-1.97496	-4.12517	-0.396634	42476152	PTN	TGTAGTCAGCAAAATGGGGGTGGGGAAGCAGAGCATGTCCTAGTTCAATG	NM_002825.5		1.20691
ILMN_1653494	0.988845	0.938	S100A1	0.0790741	-5.819	0.0457482	5454031	S100A1	CTCTTCCCCCTGCTTCCACCTCACCCCACTTATCCCTCTCCATAACCCCA	NM_006271.1		0.0277972
ILMN_2046730	0.950052	0.423	S100A10	-0.818364	-5.50643	-0.222496	115298655	S100A10	GAGCAGTTCGCTCCTCCCTGATAAGAGTTGTCCCAAAGGGTCGCTTAAGG	NM_002966.2		0.37366
ILMN_1796712	0.985591	0.914	S100A10	-0.10888	-5.81632	-0.0208212	4506760	S100A10	GGCAGAAATGAGCAGTTCGCTCCTCCCTGATAAGAGTTGTCCAAAGGGTC	NM_002966.1		0.0390538
ILMN_1750101	0.950052	0.535	S100A11	-0.630636	-5.63326	-0.104678	5032056	S100A11	CTGTCATCATCTCCACAGCCCACCCATCCCCTGAGCACACTAACCACCTC	NM_005620.1		0.271646
ILMN_2407168	0.876479	0.117	S100A13	-1.63724	-4.62145	-0.334509	66737369	S100A13	AAGACCTGAAGATCAGGAAGAAGTAAAGCCGCCTGGCTGAGATGGGGTGG	NM_001024211.1		0.931814
ILMN_1814799	0.950052	0.26	S100A13	1.1581	-5.20091	0.533902	66737371	S100A13	AGGATCTGTGGGGTCCTGGGTTCAGCACTCTGCCCTGCTGCCGCTGAGGA	NM_001024212.1		0.585027
ILMN_1738707	0.950052	0.301	S100A13	-1.06253	-5.29633	-0.631036	66737366	S100A13	AGGGACACTGGATGTCTTACCCCAAGCTGGGCCTTGCAGTACCTGTGGCT	NM_005979.2		0.521434
ILMN_1667138	0.950408	0.627	S100A13	0.492889	-5.70623	0.25527	66737367	S100A13	GAACAGTCTTCACGTCTCCACCCACTTCCAGATCCCAGAGGAGACAGACA	NM_001024210.1		0.202732
ILMN_1765459	0.95755	0.755	S100A13	-0.316637	-5.77404	-0.147655	66737369	S100A13	CAGCGTCAACGAGTTCAAAGAGCTGGTTACCCAGCAGTTGCCCCATCTGC	NM_001024211.1		0.122053
ILMN_1782142	0.964933	0.802	S100A13	-0.254061	-5.7911	-0.107104	66737373	S100A13	GGATGCGAGTGGCCGGAGACCAGGGCCCAACATAAACAAGCTTTGGAGAC	NM_001024213.1		0.0958256
ILMN_1783287	0.950052	0.229	S100A14	-1.24097	-5.11244	-0.196693	10190711	S100A14	GCCAAAGAATTGGTAGTAGGGGGAGAACAGAGAGGAGCTGGGCTATGGGA	NM_020672.1		0.640165
ILMN_1728049	0.615133	0.0213	S100A16	2.49619	-3.24976	0.524281	17933771	S100A16	GCTGTCTGGGGACCCTAAGAGTTTTCTCACCTGTTCAGTCTCATCTAACC	NM_080388.1		1.67162
ILMN_1725852	0.998406	0.99	S100A2	0.0126809	-5.82192	0.00825769	45269153	S100A2	CTCAGCTGGAGTGCTGGGAGATGAGGGCCTCCTGGATCCTGCTCCCTTCT	NM_005978.3		0.00436481
ILMN_1712545	0.950052	0.486	S100A3	-0.710082	-5.58338	-0.290022	4506762	S100A3	GCAGAGCGTGCACCAATGAGACCACGATGGGAAAGGGCCTATTTAACTCC	NM_002960.1		0.313364
ILMN_1684306	0.980269	0.888	S100A4	0.142594	-5.81225	0.0588009	115430249	S100A4	ATCCTGACTGCTGTCATGGCGTGCCCTCTGGAGAAGGCCCTGGATGTGAT	NM_019554.2		0.051587
ILMN_1688780	0.989626	0.943	S100A4	0.0723705	-5.81949	0.0438817	115430249	S100A4	TTCTTCCCCTCTCTACAACCCTCTCTCCTCAGCGCTTCTTCTTTCTTGGT	NM_019554.2		0.0254883
ILMN_1810857	0.950408	0.624	S100A5	0.497823	-5.70392	0.0922859	4506766	S100A5	GGGGAGAGAGGGTAGCAAACTGACCCTGAGTAGGAAGGAACTCAAGGAGC	NM_002962.1		0.204815
ILMN_1713636	0.446623	0.00689	S100A6	-3.00873	-2.29809	-0.626439	52352807	S100A6	GGAGTATGTCACCTTCCTGGGGGCCTTGGCTTTGATCTACAATGAAGCCC	NM_014624.3		2.16178
ILMN_1673191	0.950052	0.527	S100A7A	0.644475	-5.62497	0.135277	126116577	S100A7A	AGAGTTCTGACCAGCACCAGATAAGCTTCAGTGCTCTCCTTTCTTTGGCC	NM_176823.3		0.278189
ILMN_1729801	0.958258	0.763	S100A8	0.305099	-5.77746	0.0700511	21614543	S100A8	TAACTTCCAGGAGTTCCTCATTCTGGTGATAAAGATGGGCGTGGCAGCCC	NM_002964.3		0.117475
ILMN_1750974	0.950052	0.326	S100A9	1.00668	-5.34874	0.481459	9845520	S100A9	CATCATGGAGGACCTGGACACAAATGCAGACAAGCAGCTGAGCTTCGAGG	NM_002965.2		0.486782
ILMN_1771710	0.950052	0.463	S100B	0.748607	-5.55717	0.135828	5454033	S100B	GCTGGCAGCGTCCTGGAAAAAGCAACTCCATCAGAACTCGCAATCCGAGC	NM_006272.1		0.334419
ILMN_1715695	0.975511	0.864	S100G	0.173232	-5.80762	0.0313446	112382245	S100G	TGCAGCCAAAGAAGGTGATCCAGACCAGTTGTCAAAGGATGAACTGAAGC	NM_004057.2		0.0634863
ILMN_2054707	0.950052	0.483	S100Z	0.71467	-5.58033	0.129905	18640743	S100Z	TACTTTGTAGAACAATTGAAGAAGAAAGGAAAATAAAGGTAAGTAATAAG	NM_130772.1		0.316053
ILMN_1795139	0.968846	0.825	S100Z	-0.223371	-5.7981	-0.0432617	150010677	S100Z	GCAGCGAGAGCTCACGGAATTCCTCTCGTGCCAAAAGGAAACCCAGTTGG	NM_130772.3		0.0835461
ILMN_1739714	0.950052	0.473	SCUBE1	0.730787	-5.56946	0.224796	120587028	SCUBE1	GCCCAGGAATCCAAGGAGATGTTCCCACGGTCCTTCATCAAACTGCTGCG	NM_173050.2		0.325139
ILMN_1779416	0.963331	0.79	SCUBE2	0.270312	-5.78702	0.180894	10190747	SCUBE2	TGGGAGGACTCAGTTTCTCCACAGCCTTCTCCAGCCTGTGTGATACAAGT	NM_020974.1		0.102373
ILMN_1659359	0.988845	0.936	SCUBE3	-0.0808087	-5.81887	-0.0255296	31377567	SCUBE3	GTCCATGCCCAAGCCCAAAGCCTGCACACATTCTGCCCTTAATCCAAGTG	NM_152753.2		0.0287242
ILMN_2149164	0.943731	0.212	SFRP1	-1.2882	-5.05972	-0.471535	56117837	SFRP1	CACTTGGCTCTTGGTACCTGTGGGTTAGCATCAAGTTCTCCCCAGGGTAG	NM_003012.3		0.673664
ILMN_1722898	0.973734	0.856	SFRP2	-0.183833	-5.80581	-0.0748271	52630413	SFRP2	GGCCCAAACTTGTGGGTCACAAACCCTGTTGAGATAAAGCTGGCTGTTAT	NM_003013.2		0.0675262
ILMN_1810172	0.950052	0.28	SFRP4	1.10906	-5.25078	0.504322	8400733	SFRP4	GTTCAGGACAAGAAGAAAACAGCCGGGCGCACCAGTCGTAGTAATCCCCC	NM_003014.2		0.552842
ILMN_2185728	0.956262	0.733	SFRP4	0.345752	-5.76485	0.0617002	8400733	SFRP4	GCACAACGCCCAAAGGAAATAAAATCCTATCTAATCCTACTCTCCACTAC	NM_003014.2		0.134896
ILMN_1790026	0.968066	0.821	SFRP5	0.228825	-5.79692	0.126337	8400734	SFRP5	CATCCTAGCCCCCCTTAGGAAAGGAGTTAGGGTCTCAGTGCCTCCAGCCA	NM_003015.2		0.0856568
ILMN_1652693	0.903835	0.147	SHH	-1.50902	-4.792	-0.949939	21071042	SHH	ACCATTCTCATCAACCGGGTGCTGGCCTCGTGCTACGCGGTCATCGAGGA	NM_000193.2		0.832683
ILMN_1675808	0.953066	0.667	TCHHL1	0.436348	-5.73114	0.0959963	56606113	TCHHL1	GACTCTGCTCATGTTCAGGTGCAGCTGAATCTATCGCCATGGATTCATTC	NM_001008536.1		0.175874
ILMN_2132379	0.950052	0.411	TDGF1	-0.83951	-5.49021	-0.14955	4507424	TDGF1	AGGGCAAGTTTCCATCATCTATAGAAAGCTATATAAGACAAGAACTCCCC	NM_003212.1		0.386158
ILMN_2083946	0.950052	0.505	TGFA	-0.678085	-5.60414	-0.306525	4507460	TGFA	CCTGTTCTCTCTAGCCATTGATTTACCAGGCTTTCTGAAAGATCTAGTGG	NM_003236.1		0.296709
ILMN_1805175	0.976069	0.869	TGFA	-0.16721	-5.8086	-0.0827219	153791413	TGFA	ACCCCTGCCCTCTAGTTGGTTCTGGGCTTTGATCTCTTCCAACCTGCCCA	NM_001099691.1		0.0609802
ILMN_2129668	0.884958	0.129	TGFB1	-1.58393	-4.69364	-0.684876	63025221	TGFB1	AAAGATGGAGAGAGGACTGCGGATCTCTGTGTCATTGGGCGCCTGCCTGG	NM_000660.3		0.88941
ILMN_1812526	0.975187	0.863	TGFB2	0.17493	-5.80734	0.0661026	4507462	TGFB2	CACGAACCCAAAGGGTACAATGCCAACTTCTGTGCTGGAGCATGCCCGTA	NM_003238.1		0.0639892
ILMN_1687652	0.877944	0.119	TGFB3	1.62945	-4.63211	0.908022	4507464	TGFB3	GTCTTCCCCCACTTCCCCTCCAAGACCCTGTGTTCATTTGGTGTTCCTGG	NM_003239.1		0.924453
ILMN_1737943	0.950925	0.635	THPO	-0.481926	-5.71129	-0.182867	40805871	THPO	GCCTTCCAACGCCCCCATCCCCTTTACTATCATTCTCAGTGGGACTCTGA	NM_000460.2		0.197226
ILMN_1728106	0.969061	0.827	TNF	-0.220903	-5.79863	-0.0416166	25952110	TNF	CCGTGAAAACGGAGCTGAACAATAGGCTGTTCCCATGTAGCCCCCTGGCC	NM_000594.2		0.0824945
ILMN_1801307	0.964782	0.8	TNFSF10	0.256765	-5.79043	0.0907479	23510439	TNFSF10	GTAGTGTATCACAGTAGTAGCCTCCAGGTTTCCTTAAGGGACAACATCCT	NM_003810.2		0.09691
ILMN_1695900	0.950052	0.327	TNFSF11	1.00448	-5.35075	0.454394	14790148	TNFSF11	CTGGGGCTGGGCCAGGTTGTCTGCAGCGTCGCCCTGTTCTTCTATTTCAG	NM_003701.2		0.485452
ILMN_1673175	0.950052	0.502	TNFSF11	0.683663	-5.60059	0.147467	14790148	TNFSF11	CTGGTGCACTTTGTAAATTCCCTGGGGAAAACTTGCAGCTAAGGAGGGGA	NM_003701.2		0.299296
ILMN_1658713	0.955042	0.692	TNFSF11	0.402442	-5.74465	0.0977229	21536432	TNFSF11	CGCCTGGCCTATTGAAGGTTTTTAATCTTCAGAGTTTCGACTTTATCAAC	NM_033012.2		0.159894
ILMN_1683700	0.950052	0.302	TNFSF12	1.05981	-5.29895	0.412316	23510442	TNFSF12	CACTGTACTCTGTGGGCAAGGATGGGTCCAGAAGACCCCACTTCAGGCAC	NM_003809.2		0.519993
ILMN_2399190	0.950052	0.395	TNFSF13	0.868991	-5.46697	0.485725	26051245	TNFSF13	GTGGCTTGTGCCATGGCTCTGCTGACCCAACAAACAGAGCTGCAGAGCCT	NM_172087.1		0.403403
ILMN_1784264	0.985412	0.912	TNFSF13	0.111872	-5.816	0.0189359	26051247	TNFSF13	CTCTCTCCACATGGAACCTTCCTGGGACTTTGATTTTACGGATATCTTGC	NM_172088.1		0.0400052
ILMN_1758418	0.98137	0.895	TNFSF13B	-0.133727	-5.81343	-0.0898455	23510443	TNFSF13B	GGCAACTCCAGTCAGAACAGCAGAAATAAGCGTGCCGTTCAGGGTCCAGA	NM_006573.3		0.048177
ILMN_2066858	0.985591	0.914	TNFSF13B	-0.109075	-5.8163	-0.0201492	23510443	TNFSF13B	CTACGCCATGGGACATCTAATTCAGAGGAAGAAGGTCCATGTCTTTGGGG	NM_006573.3		0.0390538
ILMN_1661343	0.585985	0.0175	TNFSF14	2.58874	-3.08337	0.97299	25952143	TNFSF14	CAAGGCTGGTTCCTCCTGCAGCTGCACTGGCGTCTAGGAGAGATGGTCAC	NM_003807.2		1.75696
ILMN_2363392	0.613276	0.0204	TNFSF14	-2.51601	-3.21437	-0.850918	25952146	TNFSF14	CCGAGATCACACCACTGCACTCCAACCTGGGAAACGCAGTGAGACTGTGC	NM_172014.1		1.69037
ILMN_1655414	0.950052	0.615	TNFSF14	0.510934	-5.69766	0.152311	25952143	TNFSF14	GGGTCTGACACGTGGAGAACTCAGAGGGTGCCTCAGGGGAAAGAAAACTC	NM_003807.2		0.211125
ILMN_2106380	0.950052	0.23	TNFSF15	-1.23855	-5.1151	-0.723365	23510444	TNFSF15	ACTCTAAAGAATAACTCCAAGTCTTGGCCAGGCGCAGTGGCTCACACCTG	NM_005118.2		0.638272
ILMN_1759501	0.950052	0.331	TNFSF15	-0.995733	-5.35871	-0.160802	23510444	TNFSF15	TTTCTTGGGGCCGGGAGTAGGGGGCATTCCACAGGGACAACGGTTTAGCT	NM_005118.2		0.480172
ILMN_1738335	0.950052	0.307	TNFSF18	1.04736	-5.31082	0.179699	40354198	TNFSF18	GGCATCTTCTGAACCTCCTTGCGTGAATAAGGTGTCTGACTGGAAGCTGG	NM_005092.2		0.512862
ILMN_1746175	0.941718	0.208	TNFSF4	-1.30045	-5.04577	-0.694641	23510446	TNFSF4	GGCCTCTGCAACCACACAGGGATATTTCTGCTATGCACCAGCCTCACTCC	NM_003326.2		0.681937
ILMN_2089875	0.98664	0.923	TNFSF4	0.0973296	-5.81746	0.0392486	23510446	TNFSF4	CTGGACAAGCTTACATCTTCCTCAGCCATCTTTGTGAGTCCTTCAAGAGC	NM_003326.2		0.0347983
ILMN_1761778	0.956211	0.733	TNFSF8	0.346505	-5.7646	0.074152	24119162	TNFSF8	GGTCTGTCTGAAGGAAGCAACAGAGAAGTGGGGAATCCAGTCTGCTAGGC	NM_001244.2		0.134896
ILMN_1751464	0.892347	0.137	TNFSF9	1.54873	-4.74031	0.491069	24119163	TNFSF9	GTGTATTGAGCATCTGTAATGTGCCAGCATTGTGCCCAGGCTAGGGGGCT	NM_003811.2		0.863279
ILMN_2357155	0.941571	0.206	TPO	1.30599	-5.03943	0.284327	28558983	TPO	GCTGATCGGAGGCTTCGCAGGTCTCACCTCGACGGTGATTTGCAGGTGGA	NM_175719.1		0.686133
ILMN_2355423	0.950925	0.634	TPO	0.482828	-5.71088	0.121955	28558985	TPO	CTGGCCTTTTCTTGTAAACATTGCCTGATTTGTTCCTTCTGGGGCTTTGC	NM_175720.1		0.197911
ILMN_1693060	0.920218	0.172	VEGFA	1.41554	-4.90948	0.838253	71051575	VEGFA	GTACGTTGGTGCCCGCTGCTGTCTAATGCCCTGGAGCCTCCCTGGCCCCC	NM_001025366.1		0.764472
ILMN_1803882	0.946472	0.216	VEGFA	1.27621	-5.07326	0.673179	71051578	VEGFA	ATTTAATTTTGCTAACACTCAGCTCTGCCCTCCCCGATCCCCTGGCTCCC	NM_001025367.1		0.665546
ILMN_2375879	0.950408	0.628	VEGFA	-0.491625	-5.70682	-0.17401	71051577	VEGFA	CCCTGGCTCCCCAGCACACATTCCTTTGAAATAAGGTTTCAATATACATC	NM_003376.4		0.20204
ILMN_1726981	0.899391	0.143	VEGFB	-1.52349	-4.77327	-0.261884	39725673	VEGFB	GCATAATGGGATTTGGGCTTTGGTACAAGAACTGTGACCCCCAACCCTGA	NM_003377.3		0.844664
ILMN_1722855	0.924455	0.179	VEGFB	-1.39295	-4.93698	-0.204309	39725673	VEGFB	GGACAGAGTTGGAAGAGGAGACTGGGAGGCAGCAAGAGGGGTCACATACC	NM_003377.3		0.747147
ILMN_1801814	0.950925	0.647	VEGFB	0.46481	-5.71897	0.216409	39725673	VEGFB	GGACTCTGCCCCCGGAGCACCCTCCCCAGCTGACATCACCCATCCCACTC	NM_003377.3		0.189096
ILMN_1701204	0.986216	0.92	VEGFC	0.101631	-5.81705	0.0508344	19924300	VEGFC	CTGTTACAGACGGCCATGTACGAACCGCCAGAAGGCTTGTGAGCCAGGAT	NM_005429.2		0.0362122
ILMN_1736448	0.937141	0.203	VWC2	1.31564	-5.02833	0.397344	142366129	VWC2	GCCACTGTACTTATGAGGAAGGCACATGGAGAATCGAGCGGCAGGCCATG	NM_198570.2		0.692504
ILMN_1809601	0.950052	0.401	WFIKKN1	0.858413	-5.47539	0.164531	51873056	WFIKKN1	TCGAGGACGTGCTCAAGGATGACAAGATGGGCCTCAAGTTCTTGGGCACC	NM_053284.2		0.396856
ILMN_1662837	0.955042	0.696	WFIKKN2	-0.396713	-5.74683	-0.179813	140161536	WFIKKN2	CTAGAGAGAGGATTGGGAAACCCCACTGTCAGCTCTGCATCTGCCCCCAC	NM_175575.5		0.157391
ILMN_1721541	0.950052	0.421	WIF1	0.82109	-5.50436	0.1926	18379354	WIF1	GGACTAGAGGGAGAGCAGTGTGAAATCAGCAAATGCCCACAACCCTGTCG	NM_007191.2		0.375718
ILMN_1814443	0.950925	0.648	WNT1	-0.463938	-5.71935	-0.132814	16936523	WNT1	GGGAACCAGCAGAAATGCCCCCATTCTCCCAGTCTCTGTCGTGGAGCCAT	NM_005430.2		0.188425
ILMN_1658426	0.668378	0.0314	WNT10A	-2.3133	-3.56976	-1.60145	16936519	WNT10A	CCACACCCTAAAACAAGCCTCAGCCAGGCAACCCGTCAGTCTGTCTCCAT	NM_025216.2		1.50307
ILMN_1712283	0.955626	0.717	WNT10B	-0.36771	-5.75738	-0.135247	16936521	WNT10B	CTGCAGCCTGGGCTCCCTCTTGTGGGATAATGGGAGACAGTGGTAGAGAG	NM_003394.2		0.144481
ILMN_1662188	0.953566	0.673	WNT11	0.427784	-5.73465	0.135215	17017973	WNT11	GCTGTATGAAATAAATGCTGAGTGAGCCCCAGCCCGCCCCTGCAGTTCCC	NM_004626.2		0.171985
ILMN_1679215	0.950052	0.279	WNT16	1.11221	-5.24763	0.210908	17402913	WNT16	CCACTTGCCTCAGGGAGACCCTCTTCACAGGGGCTTCTCAAAAGACCTCC	NM_016087.2		0.554396
ILMN_1731964	0.988845	0.938	WNT16	0.0783086	-5.81906	0.0151365	17402915	WNT16	GGACACAAGGCAGAGAATGCAACCGTACATCAGAGGGTGCAGATGGCTGC	NM_057168.1		0.0277972
ILMN_1694011	0.950052	0.587	WNT2	0.552594	-5.67672	0.0923678	4507926	WNT2	TCTGATGTAACAAGGTGGGGACGTGTGTCCTTTGGTACTATGGTGTGTTG	NM_003391.1		0.231362
ILMN_1740269	0.914375	0.163	WNT2B	-1.44632	-4.87146	-0.64412	13518020	WNT2B	GGACAGCACTGCCTCTTTTGCTTACTTGCTGCCTGTTCAAACTGAGGTGG	NM_024494.1		0.787812
ILMN_1651492	0.986749	0.925	WNT2B	0.0954697	-5.81763	0.0187986	13518020	WNT2B	AGTCTTCGGGGAGCTATGCTGAGACCGGGTGGTGCGGAGGAAGCTGCGCA	NM_024494.1		0.0338583
ILMN_1803593	0.950052	0.464	WNT3	0.745694	-5.5592	0.332971	21536426	WNT3	ACGCGTGGTAAATGACCCAGACCCAACTCGCCTGTGGACGGGGAGGCTCT	NM_030753.3		0.333482
ILMN_1815700	0.69312	0.036	WNT3A	2.24721	-3.68221	0.664643	17017978	WNT3A	GCCCCAAGAGCCCAAAAGAGGGCACACCGCCATCCTCTGCCTCAAATTCT	NM_033131.2		1.4437
ILMN_1666392	0.950052	0.416	WNT4	-0.831259	-5.49659	-0.171373	45439371	WNT4	CCTGCGCCGGCAACCACCTAGTGGCCCAGGGAAGGCCGATAATTTAAACA	NM_030761.3		0.380907
ILMN_1800317	0.950052	0.455	WNT5A	-0.762042	-5.54773	-0.290459	40806204	WNT5A	CTCCAAGAGATCGTTAGCAGCATCAGTCCACAAACACTTAGTGGCCCACA	NM_003392.3		0.341989
ILMN_1772824	0.950052	0.513	WNT5B	0.666689	-5.61132	0.12179	17402920	WNT5B	TCTTCATCCTCCACGGTTCACTAGCTCCTACCTGAAGAGGAAAGGGGGCC	NM_032642.2		0.289883
ILMN_1661788	0.967405	0.816	WNT5B	-0.235188	-5.79551	-0.129339	17402918	WNT5B	AGCAGAAGGTTGACAGCTTCAGTAAGATCTCAAGAGAGCGAGAAGACTGG	NM_030775.2		0.0883098
ILMN_1795706	0.892107	0.137	WNT6	1.54965	-4.73911	0.3155	53729353	WNT6	GCTCTGGAAATGGTGAGGCGAGGGGCTTGAGAGGAACGCCCACCCACGAA	NM_006522.3		0.863279
ILMN_1778575	0.950052	0.545	WNT7A	-0.615562	-5.64208	-0.363198	34328912	WNT7A	CAGAGCCCTCAACTATTCTGTTCCACACCCAATGCTGCTCCACCCTCCCC	NM_004625.3		0.263603
ILMN_2153495	0.950052	0.609	WNT7B	-0.520182	-5.69315	-0.152989	17505192	WNT7B	CACATAGCCAGTCCTAACTCCGTACTCTGTGTCAGCCCATCCCCTAGACA	NM_058238.1		0.215383
ILMN_1727252	0.950052	0.449	WNT8A	0.771526	-5.54097	0.122404	89111138	WNT8A	GAGTGTGGGCTGCAGGTGGAAGAGAGGAAAACTGAGGTCATAAGCAGCTG	NM_058244.2		0.347754
ILMN_1663997	0.95755	0.753	WNT8A	-0.318738	-5.7734	-0.102093	89111138	WNT8A	GGAACCTGGGCCTCCTGACTTTGGCAGACCCCCATTTCATCTTTCCTGCA	NM_058244.2		0.123205
ILMN_1749675	0.851733	0.0997	WNT8B	1.72565	-4.49785	0.405198	110735436	WNT8B	CCCGAGGGACTCCAGATACATACCCCGAAGGTCTAGGAAATACGTTAAGG	NM_003393.3		1.0013
ILMN_3307767	0.950052	0.387	WNT9A	0.883474	-5.45528	0.149982	208022676	WNT9A	GCAAGCATCTGAAGCACAAGTATGAGACGGCACTCAAGGTGGGCAGCACC	NM_003395.2		0.412289
ILMN_1766729	0.99498	0.974	WNT9A	-0.0330411	-5.82148	-0.0111142	15082260	WNT9A	TCAGTCCTAGCTGCATGGGGTGCAGGCATTGCACAGAGCATGAATGGGCC	NM_003395.1		0.011441
ILMN_1703459	0.879472	0.121	WNT9B	-1.62113	-4.64345	-0.361194	17017975	WNT9B	CCCAACCTTGTTGAGGACTTGGAGAGGAGGGCAGAGTGAGAAAGACATGG	NM_003396.1		0.917215
ILMN_2224955	0.950052	0.495	XCL1	0.694351	-5.5937	0.121968	4506852	XCL1	CCAGTCTTCACTGGGTTCCCATTCTGAGGGTCCACTACTCAAAAATTTGC	NM_002995.1		0.305395
ILMN_1718792	0.978422	0.881	XCL1	0.15131	-5.81103	0.0277438	4506852	XCL1	GGTAACCATAATGGAAGAGATTCTGGCTAGTGTCTATCAGAGGTGAAAGC	NM_002995.1		0.0550241

## Sheet: GSE 30122 matrisome
Supplementary Table 2B. Differentially expression of matrisome defining genes in GSE 30122
ID	adj.P.Val	P.Value	SYMBOL	t	B	logFC	Gene.symbol	Gene.title
220518_at	0.816	0.651	ABI3BP	0.458324	-6.52338	0.0478198	ABI3BP	ABI family member 3 binding protein
207175_at	0.925	0.84	ADIPOQ	-0.204129	-6.60928	-0.0162794	ADIPOQ	adiponectin, C1Q and collagen domain containing
201792_at	0.0792	0.0141	AEBP1	2.65917	-3.4784	0.549749	AEBP1	AE binding protein 1
212283_at	0.0989	0.0198	AGRN	2.50485	-3.79324	0.36262	AGRN	agrin
217419_x_at	0.451	0.224	AGRN	-1.24988	-5.8559	-0.269647	AGRN	agrin
212285_s_at	0.659	0.438	AGRN	-0.789286	-6.31541	-0.196425	AGRN	agrin
217410_at	0.836	0.684	AGRN	-0.412536	-6.54366	-0.0866864	AGRN	agrin
221114_at	0.995	0.986	AMBN	0.017521	-6.63048	0.0017042	AMBN	ameloblastin
208410_x_at	0.685	0.471	AMELX	0.733539	-6.35786	0.0592881	AMELX	amelogenin, X-linked
206227_at	0.0441	0.00578	CILP	3.04468	-2.65233	0.370085	CILP	cartilage intermediate layer protein
205229_s_at	0.603	0.373	COCH	0.907963	-6.21531	0.251924	COCH	cochlin
206073_at	0.97	0.927	COLQ	0.092908	-6.62621	0.0105918	COLQ	collagen like tail subunit of asymmetric acetylcholinesterase
205713_s_at	0.0408	0.00512	COMP	3.09665	-2.53726	0.821527	COMP	cartilage oligomeric matrix protein
203368_at	0.0176	0.00149	CRELD1	-3.60948	-1.36619	-0.586418	CRELD1	cysteine rich with EGF like domains 1
218358_at	0.728	0.527	CRELD2	0.6423	-6.42092	0.11385	CRELD2	cysteine rich with EGF like domains 2
221541_at	0.662	0.442	CRISPLD2	0.782926	-6.3204	0.26661	CRISPLD2	cysteine rich secretory protein LCCL domain containing 2
209101_at	0.000849	2.17e-05	CTGF	-5.31898	2.72589	-1.98966	CTGF	connective tissue growth factor
210764_s_at	0.675	0.456	CYR61	0.757519	-6.33996	0.249507	CYR61	cysteine rich angiogenic inducer 61
201289_at	0.959	0.907	CYR61	-0.118237	-6.62346	-0.0464218	CYR61	cysteine rich angiogenic inducer 61
208250_s_at	0.72	0.515	DMBT1	0.662134	-6.4079	0.0969801	DMBT1	deleted in malignant brain tumors 1
217067_s_at	0.372	0.163	DMP1	1.44331	-5.60875	0.103737	DMP1	dentin matrix acidic phosphoprotein 1
208175_s_at	0.879	0.756	DMP1	0.315077	-6.57982	0.017788	DMP1	dentin matrix acidic phosphoprotein 1
213068_at	0.113	0.0243	DPT	2.41212	-3.97734	0.184146	DPT	dermatopontin
213071_at	0.269	0.0955	DPT	1.73883	-5.17563	0.177888	DPT	dermatopontin
207977_s_at	0.58	0.348	DPT	0.958358	-6.16886	0.0915774	DPT	dermatopontin
221681_s_at	0.399	0.182	DSPP	1.37681	-5.69711	0.184284	DSPP	dentin sialophosphoprotein
209365_s_at	0.094	0.0183	ECM1	-2.5415	-3.71938	-0.923807	ECM1	extracellular matrix protein 1
206101_at	0.0457	0.00607	ECM2	-3.02414	-2.69759	-0.709345	ECM2	extracellular matrix protein 2
207379_at	0.678	0.462	EDIL3	0.748954	-6.34642	0.0982584	EDIL3	EGF like repeats and discoidin domains 3
201842_s_at	9.03e-06	2.68e-08	EFEMP1	-8.24727	9.2365	-1.12007	EFEMP1	EGF containing fibulin like extracellular matrix protein 1
201843_s_at	0.000875	2.33e-05	EFEMP1	-5.29022	2.65721	-1.03462	EFEMP1	EGF containing fibulin like extracellular matrix protein 1
206580_s_at	0.0387	0.00474	EFEMP2	-3.12928	-2.46461	-0.608347	EFEMP2	EGF containing fibulin like extracellular matrix protein 2
209356_x_at	0.144	0.0355	EFEMP2	-2.23505	-4.31731	-0.61332	EFEMP2	EGF containing fibulin like extracellular matrix protein 2
212670_at	0.386	0.172	ELN	1.40862	-5.65528	0.200969	ELN	elastin
216269_s_at	0.404	0.185	ELN	1.3656	-5.71166	0.158312	ELN	elastin
213779_at	0.356	0.151	EMID1	-1.48729	-5.5484	-0.251061	EMID1	EMI domain containing 1
204163_at	0.577	0.345	EMILIN1	0.964792	-6.16277	0.163537	EMILIN1	elastin microfibril interfacer 1
221980_at	0.598	0.368	EMILIN2	-0.91878	-6.20553	-0.0692211	EMILIN2	elastin microfibril interfacer 2
202994_s_at	0.000493	1.05e-05	FBLN1	5.6188	3.43824	1.12772	FBLN1	fibulin 1				4.97881
202995_s_at	0.000875	2.32e-05	FBLN1	5.29227	2.66212	0.67828	FBLN1	fibulin 1
201787_at	0.0579	0.00863	FBLN1	2.87327	-3.02598	0.506091	FBLN1	fibulin 1
207835_at	0.145	0.036	FBLN1	2.22889	-4.32885	0.391735	FBLN1	fibulin 1
207834_at	0.838	0.689	FBLN1	0.405225	-6.5467	0.063421	FBLN1	fibulin 1
203886_s_at	0.412	0.192	FBLN2	1.345	-5.73814	0.227405	FBLN2	fibulin 2
203088_at	0.0362	0.00431	FBLN5	3.16921	-2.37534	0.743718	FBLN5	fibulin 5
202766_s_at	0.0513	0.00715	FBN1	2.95424	-2.85064	0.820807	FBN1	fibrillin 1
202765_s_at	0.819	0.656	FBN1	0.450815	-6.52685	0.0664368	FBN1	fibrillin 1
203184_at	0.205	0.0618	FBN2	1.96375	-4.80527	0.295023	FBN2	fibrillin 2
215717_s_at	0.383	0.171	FBN2	1.41425	-5.6478	0.167709	FBN2	fibrillin 2
205649_s_at	0.639	0.414	FGA	-0.832282	-6.28066	-0.17271	FGA	fibrinogen alpha chain
205650_s_at	0.979	0.948	FGA	-0.065971	-6.6284	-0.0178257	FGA	fibrinogen alpha chain
216238_s_at	0.216	0.0669	FGB	1.92381	-4.87342	0.638082	FGB	fibrinogen beta chain
204988_at	0.448	0.221	FGB	1.25777	-5.84643	0.989641	FGB	fibrinogen beta chain
219612_s_at	0.102	0.021	FGG	2.47987	-3.84323	0.777689	FGG	fibrinogen gamma chain
205305_at	0.574	0.341	FGL1	0.971489	-6.15638	0.098104	FGL1	fibrinogen like 1
204834_at	0.876	0.75	FGL2	-0.323116	-6.5772	-0.0923389	FGL2	fibrinogen like 2
210495_x_at	0.000144	1.86e-06	FN1	6.34226	5.12234	1.54031	FN1	fibronectin 1				5.73049
212464_s_at	0.000193	2.76e-06	FN1	6.17481	4.7376	1.66476	FN1	fibronectin 1				5.55909
216442_x_at	0.000286	4.89e-06	FN1	5.93391	4.17854	1.49157	FN1	fibronectin 1				5.31069
211719_x_at	0.000301	5.36e-06	FN1	5.89594	4.08984	1.6439	FN1	fibronectin 1				5.27084
214701_s_at	0.431	0.207	FN1	1.29845	-5.7967	0.141426	FN1	fibronectin 1
214702_at	0.75	0.556	FN1	-0.598214	-6.4485	-0.0376151	FN1	fibronectin 1
220499_at	0.867	0.735	FNDC8	-0.342916	-6.57047	-0.0411138	FNDC8	fibronectin type III domain containing 8
220910_at	0.186	0.0528	FRAS1	2.04258	-4.66788	0.249094	FRAS1	Fraser extracellular matrix complex subunit 1
1598_g_at	0.116	0.0253	GAS6	-2.39446	-4.01194	-0.725133	GAS6	growth arrest specific 6
202177_at	0.198	0.0588	GAS6	-1.98949	-4.76081	-0.713298	GAS6	growth arrest specific 6
207370_at	0.396	0.18	IBSP	1.38352	-5.68835	0.181005	IBSP	integrin binding sialoprotein
215712_s_at	0.775	0.591	IGFALS	-0.544994	-6.47927	-0.103794	IGFALS	insulin like growth factor binding protein acid labile subunit
205302_at	0.0268	0.00277	IGFBP1	-3.35394	-1.95699	-1.92499	IGFBP1	insulin like growth factor binding protein 1
202718_at	0.058	0.00865	IGFBP2	-2.87187	-3.02901	-1.59424	IGFBP2	insulin like growth factor binding protein 2
210095_s_at	0.00258	9.66e-05	IGFBP3	4.71382	1.2723	1.0335	IGFBP3	insulin like growth factor binding protein 3				4.01502
212143_s_at	0.0421	0.00538	IGFBP3	3.0754	-2.58439	0.604125	IGFBP3	insulin like growth factor binding protein 3
201508_at	0.128	0.0294	IGFBP4	2.32429	-4.14794	0.726401	IGFBP4	insulin like growth factor binding protein 4
203424_s_at	0.041	0.00516	IGFBP5	-3.09264	-2.54618	-1.55141	IGFBP5	insulin like growth factor binding protein 5
203426_s_at	0.0865	0.016	IGFBP5	-2.6014	-3.59745	-0.669623	IGFBP5	insulin like growth factor binding protein 5
211959_at	0.136	0.0324	IGFBP5	-2.27827	-4.23579	-0.866217	IGFBP5	insulin like growth factor binding protein 5
203425_s_at	0.18	0.0502	IGFBP5	-2.06728	-4.62408	-0.317435	IGFBP5	insulin like growth factor binding protein 5
211958_at	0.541	0.309	IGFBP5	-1.04037	-6.08836	-0.253024	IGFBP5	insulin like growth factor binding protein 5
203851_at	0.00502	0.000251	IGFBP6	4.32966	0.34646	0.829266	IGFBP6	insulin like growth factor binding protein 6
201163_s_at	0.0215	0.00201	IGFBP7	3.48641	-1.6523	0.304453	IGFBP7	insulin like growth factor binding protein 7
201162_at	0.205	0.0621	IGFBP7	-1.96184	-4.80854	-0.257214	IGFBP7	insulin like growth factor binding protein 7
213910_at	0.755	0.561	IGFBP7	0.58936	-6.45381	0.0702436	IGFBP7	insulin like growth factor binding protein 7
222346_at	0.899	0.791	LAMA1	-0.267906	-6.59387	-0.0296879	LAMA1	laminin subunit alpha 1
216840_s_at	0.0172	0.00144	LAMA2	3.62306	-1.33447	0.379473	LAMA2	laminin subunit alpha 2
213519_s_at	0.0903	0.0172	LAMA2	2.56965	-3.66227	0.228985	LAMA2	laminin subunit alpha 2
205116_at	0.136	0.0325	LAMA2	2.27642	-4.2393	0.289907	LAMA2	laminin subunit alpha 2
216839_at	0.905	0.802	LAMA2	-0.253951	-6.5976	-0.0146468	LAMA2	laminin subunit alpha 2
203726_s_at	0.984	0.959	LAMA3	0.052051	-6.62924	0.0146362	LAMA3	laminin subunit alpha 3
202202_s_at	0.0377	0.00458	LAMA4	3.14352	-2.43283	0.789131	LAMA4	laminin subunit alpha 4
210990_s_at	0.0619	0.00962	LAMA4	2.82596	-3.12741	0.217	LAMA4	laminin subunit alpha 4
210089_s_at	0.295	0.111	LAMA4	1.6576	-5.30102	0.198283	LAMA4	laminin subunit alpha 4
216081_at	0.703	0.491	LAMA4	0.699547	-6.38229	0.082607	LAMA4	laminin subunit alpha 4
210989_at	0.946	0.881	LAMA4	-0.151811	-6.61882	-0.0122962	LAMA4	laminin subunit alpha 4
210150_s_at	0.296	0.112	LAMA5	-1.65203	-5.30943	-0.244168	LAMA5	laminin subunit alpha 5
211651_s_at	0.227	0.0726	LAMB1	1.88207	-4.94356	0.724226	LAMB1	laminin subunit beta 1
201505_at	0.849	0.704	LAMB1	0.384482	-6.55505	0.11356	LAMB1	laminin subunit beta 1
216264_s_at	0.0124	0.000915	LAMB2	-3.80753	-0.90074	-0.916032	LAMB2	laminin subunit beta 2
209270_at	0.128	0.0295	LAMB3	2.3222	-4.15196	0.342538	LAMB3	laminin subunit beta 3
200770_s_at	0.119	0.0263	LAMC1	2.37635	-4.04727	0.316251	LAMC1	laminin subunit gamma 1
200771_at	0.905	0.802	LAMC1	-0.25318	-6.5978	-0.0563717	LAMC1	laminin subunit gamma 1
202267_at	0.0214	0.002	LAMC2	3.48894	-1.64644	0.750073	LAMC2	laminin subunit gamma 2
207517_at	0.123	0.0277	LAMC2	2.35103	-4.09641	0.186917	LAMC2	laminin subunit gamma 2
219407_s_at	0.00947	0.000623	LAMC3	3.96332	-0.53104	0.55381	LAMC3	laminin subunit gamma 3
206349_at	0.973	0.934	LGI1	0.08422	-6.627	0.0067389	LGI1	leucine rich glioma inactivated 1
219699_at	0.294	0.111	LGI2	1.65987	-5.29757	0.223109	LGI2	leucine rich repeat LGI family member 2
202728_s_at	0.0639	0.0101	LTBP1	2.80585	-3.17027	0.319852	LTBP1	latent transforming growth factor beta binding protein 1
202729_s_at	0.123	0.0275	LTBP1	2.35453	-4.08963	0.623606	LTBP1	latent transforming growth factor beta binding protein 1
204682_at	0.457	0.23	LTBP2	1.23404	-5.87479	0.24561	LTBP2	latent transforming growth factor beta binding protein 2
219922_s_at	0.424	0.201	LTBP3	-1.31572	-5.77519	-0.632395	LTBP3	latent transforming growth factor beta binding protein 3
204442_x_at	0.112	0.0239	LTBP4	-2.42048	-3.96091	-0.358483	LTBP4	latent transforming growth factor beta binding protein 4
213176_s_at	0.587	0.355	LTBP4	0.944623	-6.18175	0.111355	LTBP4	latent transforming growth factor beta binding protein 4
210628_x_at	0.967	0.921	LTBP4	0.100207	-6.62548	0.009613	LTBP4	latent transforming growth factor beta binding protein 4
206905_s_at	0.0439	0.00573	MATN1	3.04856	-2.64376	0.252677	MATN1	matrilin 1, cartilage matrix protein
206904_at	0.911	0.815	MATN1	0.236706	-6.60193	0.0262537	MATN1	matrilin 1, cartilage matrix protein
206091_at	0.0571	0.00846	MATN3	-2.88155	-3.00817	-0.351678	MATN3	matrilin 3
207123_s_at	0.373	0.164	MATN4	1.4394	-5.61404	0.162044	MATN4	matrilin 4
221150_at	0.555	0.323	MEPE	-1.01073	-6.11815	-0.118257	MEPE	matrix extracellular phosphoglycoprotein
203417_at	0.0191	0.00169	MFAP2	3.55812	-1.48593	0.359074	MFAP2	microfibrillar associated protein 2
213123_at	0.0291	0.00315	MFAP3	-3.29957	-2.08097	-0.453821	MFAP3	microfibrillar associated protein 3
214588_s_at	0.51	0.277	MFAP3	1.11383	-6.01118	0.0654242	MFAP3	microfibrillar associated protein 3
212713_at	0.000639	1.48e-05	MFAP4	5.4757	3.09913	0.491506	MFAP4	microfibrillar associated protein 4
213765_at	0.0802	0.0144	MFAP5	2.64941	-3.49861	0.18403	MFAP5	microfibrillar associated protein 5
209758_s_at	0.144	0.0358	MFAP5	2.23118	-4.32456	0.218917	MFAP5	microfibrillar associated protein 5
213764_s_at	0.571	0.338	MFAP5	0.977769	-6.15036	0.0918007	MFAP5	microfibrillar associated protein 5
210605_s_at	0.00915	0.000596	MFGE8	3.98139	-0.488	0.403467	MFGE8	milk fat globule-EGF factor 8 protein
202291_s_at	0.709	0.5	MGP	-0.685265	-6.39222	-0.22003	MGP	matrix Gla protein
205612_at	0.19	0.0549	MMRN1	2.02365	-4.70122	0.165643	MMRN1	multimerin 1
219091_s_at	0.433	0.209	MMRN2	-1.29253	-5.80402	-0.293816	MMRN2	multimerin 2
219747_at	0.000754	1.85e-05	NDNF	-5.38452	2.8822	-3.18513	NDNF	neuron derived neurotrophic factor
206089_at	0.0178	0.00152	NELL1	-3.60134	-1.3852	-1.96679	NELL1	neural EGFL like 1
203413_at	0.00158	5.02e-05	NELL2	4.97784	1.90825	1.06045	NELL2	neural EGFL like 2				4.2993
202008_s_at	0.0854	0.0157	NID1	2.60894	-3.582	0.258505	NID1	nidogen 1
202007_at	0.734	0.536	NID1	-0.628885	-6.42951	-0.164571	NID1	nidogen 1
204114_at	0.0705	0.0117	NID2	-2.73907	-3.31158	-0.6756	NID2	nidogen 2
214321_at	0.28	0.102	NOV	-1.70224	-5.23268	-0.714981	NOV	nephroblastoma overexpressed
204501_at	0.995	0.986	NOV	0.01775	-6.63047	0.002637	NOV	nephroblastoma overexpressed
208005_at	0.674	0.456	NTN1	0.75875	-6.33903	0.0437792	NTN1	netrin 1
207640_x_at	0.164	0.0437	NTN3	2.13569	-4.50089	0.167819	NTN3	netrin 3
206713_at	7.44e-05	7.05e-07	NTNG1	-6.75962	6.06627	-1.88	NTNG1	netrin G1
202465_at	6.66e-05	5.99e-07	PCOLCE	6.83063	6.22462	0.82638	PCOLCE	procollagen C-endopeptidase enhancer
219295_s_at	0.00105	2.93e-05	PCOLCE2	-5.19695	2.43414	-3.0358	PCOLCE2	procollagen C-endopeptidase enhancer 2
210809_s_at	0.7	0.488	POSTN	-0.704632	-6.37871	-0.320922	POSTN	periostin
214981_at	0.752	0.558	POSTN	0.594676	-6.45063	0.0312674	POSTN	periostin
212013_at	0.914	0.82	PXDN	-0.230687	-6.60337	-0.0589642	PXDN	peroxidasin
212012_at	0.986	0.965	PXDN	-0.044296	-6.62963	-0.0173761	PXDN	peroxidasin
205923_at	0.108	0.0225	RELN	-2.44764	-3.90729	-0.711325	RELN	reelin
214725_at	0.00338	0.000146	SBSPON	-4.54772	0.87176	-1.23427	SBSPON	somatomedin B and thrombospondin type 1 domain containing
213601_at	0.3	0.114	SLIT1	1.64288	-5.32323	0.190829	SLIT1	slit guidance ligand 1
208221_s_at	0.557	0.324	SLIT1	1.00699	-6.12186	0.0700981	SLIT1	slit guidance ligand 1
209897_s_at	0.27	0.0957	SLIT2	1.73773	-5.17736	0.29732	SLIT2	slit guidance ligand 2
216216_at	0.21	0.0643	SLIT3	1.94436	-4.83847	0.167757	SLIT3	slit guidance ligand 3
203812_at	0.972	0.932	SLIT3	-0.086118	-6.62683	-0.007155	SLIT3	slit guidance ligand 3
203813_s_at	0.973	0.935	SLIT3	-0.083094	-6.62709	-0.0113202	SLIT3	slit guidance ligand 3
213488_at	0.0481	0.00652	SNED1	-2.99385	-2.76409	-0.718163	SNED1	sushi, nidogen and EGF like domains 1
213493_at	0.0516	0.00724	SNED1	-2.94878	-2.86253	-0.667911	SNED1	sushi, nidogen and EGF like domains 1
212667_at	9e-05	9.02e-07	SPARC	-6.65263	5.82642	-1.41574	SPARC	secreted protein acidic and cysteine rich
200665_s_at	0.222	0.0699	SPARC	-1.90197	-4.91026	-0.427588	SPARC	secreted protein acidic and cysteine rich
200795_at	0.616	0.389	SPARCL1	0.877676	-6.2421	0.326038	SPARCL1	SPARC like 1
209436_at	0.00317	0.000132	SPON1	4.58923	0.97185	0.850823	SPON1	spondin 1
213994_s_at	0.00724	0.000427	SPON1	4.11592	-0.16664	1.49638	SPON1	spondin 1				3.36957
209437_s_at	0.101	0.0204	SPON1	2.4927	-3.81759	0.218202	SPON1	spondin 1
213993_at	0.121	0.0268	SPON1	2.36652	-4.06639	0.679431	SPON1	spondin 1
209875_s_at	0.00585	0.000316	SPP1	4.23706	0.12385	1.03593	SPP1	secreted phosphoprotein 1				3.50031
204955_at	0.157	0.0408	SRPX	2.16836	-4.44113	0.580007	SRPX	sushi repeat containing protein, X-linked
205499_at	0.00828	0.000515	SRPX2	4.04033	-0.34741	0.481798	SRPX2	sushi repeat containing protein, X-linked 2
216639_at	0.656	0.434	SRPX2	-0.795563	-6.31045	-0.0695799	SRPX2	sushi repeat containing protein, X-linked 2
213247_at	0.000869	2.25e-05	SVEP1	5.30345	2.68881	0.731847	SVEP1	sushi, von Willebrand factor type A, EGF and pentraxin domain containing 1
219552_at	0.477	0.248	SVEP1	1.18662	-5.93007	0.0736606	SVEP1	sushi, von Willebrand factor type A, EGF and pentraxin domain containing 1
221296_at	0.436	0.212	TECTA	1.28465	-5.81372	0.11592	TECTA	tectorin alpha
201506_at	0.00972	0.000642	TGFBI	3.95091	-0.56059	1.32786	TGFBI	transforming growth factor beta induced				3.19246
201108_s_at	0.0276	0.00291	THBS1	-3.33344	-2.00382	-0.522172	THBS1	thrombospondin 1
215775_at	0.229	0.0735	THBS1	1.87593	-4.9538	0.166721	THBS1	thrombospondin 1
201109_s_at	0.296	0.112	THBS1	-1.65327	-5.30756	-0.394527	THBS1	thrombospondin 1
201110_s_at	0.346	0.144	THBS1	1.51285	-5.51266	0.670171	THBS1	thrombospondin 1
201107_s_at	0.989	0.972	THBS1	-0.035003	-6.63001	-0.0039768	THBS1	thrombospondin 1
203083_at	0.00145	4.47e-05	THBS2	5.02554	2.02292	2.01399	THBS2	thrombospondin 2				4.34969
209561_at	0.07	0.0116	THBS3	2.74451	-3.30012	0.297702	THBS3	thrombospondin 3
204776_at	0.528	0.296	THBS4	-1.06998	-6.05782	-0.160274	THBS4	thrombospondin 4
219153_s_at	0.46	0.232	THSD4	1.2277	-5.88229	0.137156	THSD4	thrombospondin type 1 domain containing 4
219058_x_at	0.0433	0.0056	TINAGL1	3.05856	-2.62168	0.350858	TINAGL1	tubulointerstitial nephritis antigen like 1
201645_at	0.0169	0.0014	TNC	3.63413	-1.30858	1.38045	TNC	tenascin C				2.85387
216005_at	0.25	0.0848	TNC	1.80187	-5.07518	0.119552	TNC	tenascin C
206025_s_at	0.0438	0.00571	TNFAIP6	3.05017	-2.6402	0.448818	TNFAIP6	TNF alpha induced protein 6
206026_s_at	0.309	0.12	TNFAIP6	1.61675	-5.36229	0.455934	TNFAIP6	TNF alpha induced protein 6
215271_at	0.279	0.101	TNN	1.70651	-5.22607	0.174638	TNN	tenascin N
206990_at	0.713	0.506	TNR	0.676477	-6.39824	0.0839002	TNR	tenascin R
213841_at	0.994	0.983	TNR	0.021549	-6.6304	0.0023566	TNR	tenascin R
217413_s_at	0.0405	0.00507	TNXB	3.10076	-2.52812	0.329229	TNXB	tenascin XB
216654_at	0.129	0.0299	TNXB	2.31594	-4.16397	0.240315	TNXB	tenascin XB
218245_at	0.803	0.631	TSKU	-0.48671	-6.50975	-0.0892097	TSKU	tsukushi, small leucine rich proteoglycan
218731_s_at	0.292	0.11	VWA1	-1.66392	-5.29142	-0.328566	VWA1	von Willebrand factor A domain containing 1
210102_at	0.0186	0.00163	VWA5A	3.57199	-1.45364	0.428425	VWA5A	von Willebrand factor A domain containing 5A
205011_at	0.939	0.866	VWA5A	-0.170802	-6.61568	-0.0257249	VWA5A	von Willebrand factor A domain containing 5A
221301_at	0.528	0.296	VWA7	-1.07	-6.05781	-0.108618	VWA7	von Willebrand factor A domain containing 7
221265_s_at	0.456	0.228	VWA9	1.23855	-5.86944	0.190791	VWA9	von Willebrand factor A domain containing 9
202112_at	0.00768	0.000466	VWF	4.08064	-0.25106	0.953805	VWF	von Willebrand factor
206796_at	0.763	0.574	WISP1	0.570498	-6.46487	0.0665595	WISP1	WNT1 inducible signaling pathway protein 1
211312_s_at	0.809	0.639	WISP1	0.475051	-6.51544	0.0602438	WISP1	WNT1 inducible signaling pathway protein 1
205792_at	0.63	0.403	WISP2	0.851993	-6.26415	0.0752571	WISP2	WNT1 inducible signaling pathway protein 2
210861_s_at	0.00496	0.000246	WISP3	-4.33713	0.36443	-1.40338	WISP3	WNT1 inducible signaling pathway protein 3
207933_at	0.641	0.416	ZP2	0.827626	-6.28451	0.0624506	ZP2	zona pellucida glycoprotein 2
217428_s_at	0.261	0.0907	COL10A1	1.76617	-5.1324	0.139279	COL10A1	collagen type X alpha 1 chain
205941_s_at	0.822	0.662	COL10A1	0.442992	-6.5304	0.0661847	COL10A1	collagen type X alpha 1 chain
37892_at	0.781	0.601	COL11A1	0.530491	-6.48717	0.0935172	COL11A1	collagen type XI alpha 1 chain
204320_at	0.826	0.668	COL11A1	0.434625	-6.53414	0.0834662	COL11A1	collagen type XI alpha 1 chain
213870_at	0.567	0.335	COL11A2	0.985592	-6.1428	0.117802	COL11A2	collagen type XI alpha 2 chain
216993_s_at	0.822	0.661	COL11A2	0.4437	-6.53008	0.0660243	COL11A2	collagen type XI alpha 2 chain
208535_x_at	0.362	0.155	COL13A1	1.46949	-5.57301	0.196251	COL13A1	collagen type XIII alpha 1 chain
211809_x_at	0.448	0.221	COL13A1	1.25781	-5.84637	0.150526	COL13A1	collagen type XIII alpha 1 chain
211343_s_at	0.995	0.984	COL13A1	-0.019757	-6.63043	-0.0026447	COL13A1	collagen type XIII alpha 1 chain
212865_s_at	0.00284	0.000111	COL14A1	4.65646	1.13399	0.692397	COL14A1	collagen type XIV alpha 1 chain
216865_at	0.12	0.0267	COL14A1	2.36838	-4.06278	0.186994	COL14A1	collagen type XIV alpha 1 chain
216866_s_at	0.303	0.116	COL14A1	1.63404	-5.33651	0.183579	COL14A1	collagen type XIV alpha 1 chain
203477_at	0.0374	0.00452	COL15A1	3.14906	-2.42045	1.0704	COL15A1	collagen type XV alpha 1 chain				2.34486
204345_at	0.00573	0.000306	COL16A1	4.24967	0.15413	0.676153	COL16A1	collagen type XVI alpha 1 chain
204636_at	0.995	0.985	COL17A1	-0.018872	-6.63045	-0.0017727	COL17A1	collagen type XVII alpha 1 chain
209082_s_at	0.71	0.502	COL18A1	0.682517	-6.39411	0.161351	COL18A1	collagen type XVIII alpha 1 chain
209081_s_at	0.793	0.616	COL18A1	0.508292	-6.49885	0.140861	COL18A1	collagen type XVIII alpha 1 chain
211011_at	0.805	0.633	COL19A1	0.483487	-6.51134	0.03806	COL19A1	collagen type XIX alpha 1 chain
202310_s_at	0.00106	3.01e-05	COL1A1	5.18509	2.40573	0.804358	COL1A1	collagen type I alpha 1 chain
202311_s_at	0.133	0.0314	COL1A1	2.29349	-4.20686	0.151582	COL1A1	collagen type I alpha 1 chain
217430_x_at	0.307	0.118	COL1A1	1.62417	-5.35125	0.226734	COL1A1	collagen type I alpha 1 chain
202312_s_at	0.955	0.898	COL1A1	0.129759	-6.622	0.0159042	COL1A1	collagen type I alpha 1 chain
202404_s_at	0.000447	9.18e-06	COL1A2	5.67219	3.56434	2.59099	COL1A2	collagen type I alpha 2 chain				5.03716
202403_s_at	0.00268	0.000103	COL1A2	4.68915	1.21283	1.55894	COL1A2	collagen type I alpha 2 chain				3.98716
217404_s_at	0.195	0.0571	COL2A1	2.00353	-4.73641	0.176939	COL2A1	collagen type II alpha 1 chain
213492_at	0.89	0.776	COL2A1	0.287886	-6.5882	0.0257133	COL2A1	collagen type II alpha 1 chain
215077_at	0.187	0.0536	COL3A1	2.03515	-4.68099	0.141132	COL3A1	collagen type III alpha 1 chain
215076_s_at	0.23	0.0744	COL3A1	1.8698	-4.96398	0.616062	COL3A1	collagen type III alpha 1 chain
211161_s_at	0.262	0.0913	COL3A1	1.76308	-5.1373	0.575847	COL3A1	collagen type III alpha 1 chain
201852_x_at	0.43	0.207	COL3A1	1.29986	-5.79496	0.431914	COL3A1	collagen type III alpha 1 chain
211980_at	0.749	0.553	COL4A1	0.601474	-6.44653	0.166062	COL4A1	collagen type IV alpha 1 chain
211981_at	0.81	0.642	COL4A1	0.471804	-6.517	0.135064	COL4A1	collagen type IV alpha 1 chain
211966_at	0.406	0.187	COL4A2	1.35902	-5.72016	0.354898	COL4A2	collagen type IV alpha 2 chain
211964_at	0.592	0.36	COL4A2	-0.933359	-6.19219	-0.253135	COL4A2	collagen type IV alpha 2 chain
216368_s_at	0.00126	3.73e-05	COL4A3	-5.09836	2.1978	-1.0957	COL4A3	collagen type IV alpha 3 chain
222073_at	0.00242	8.91e-05	COL4A3	-4.74651	1.35112	-1.86903	COL4A3	collagen type IV alpha 3 chain
214641_at	0.00333	0.000142	COL4A3	-4.55892	0.89877	-1.12957	COL4A3	collagen type IV alpha 3 chain
216367_at	0.00466	0.000223	COL4A3	-4.37765	0.46194	-0.528756	COL4A3	collagen type IV alpha 3 chain
216896_at	0.0158	0.00126	COL4A3	-3.67589	-1.21076	-0.654887	COL4A3	collagen type IV alpha 3 chain
216898_s_at	0.0526	0.00743	COL4A3	-2.93757	-2.88691	-0.643318	COL4A3	collagen type IV alpha 3 chain
216893_s_at	0.164	0.0434	COL4A3	-2.13857	-4.49564	-0.190107	COL4A3	collagen type IV alpha 3 chain
214602_at	0.0747	0.0128	COL4A4	-2.69992	-3.39364	-0.894166	COL4A4	collagen type IV alpha 4 chain
213110_s_at	0.00072	1.72e-05	COL4A5	-5.41351	2.95122	-1.80651	COL4A5	collagen type IV alpha 5 chain
213992_at	0.000126	1.54e-06	COL4A6	-6.42138	5.30296	-1.0766	COL4A6	collagen type IV alpha 6 chain
211473_s_at	0.389	0.175	COL4A6	1.39979	-5.66697	0.137545	COL4A6	collagen type IV alpha 6 chain
210945_at	0.834	0.681	COL4A6	-0.416804	-6.54186	-0.0316794	COL4A6	collagen type IV alpha 6 chain
212488_at	0.0304	0.00336	COL5A1	3.27315	-2.14095	0.514187	COL5A1	collagen type V alpha 1 chain
212489_at	0.107	0.0223	COL5A1	2.45125	-3.90014	0.353913	COL5A1	collagen type V alpha 1 chain
203325_s_at	0.376	0.166	COL5A1	1.43195	-5.62409	0.297535	COL5A1	collagen type V alpha 1 chain
221730_at	0.00316	0.000131	COL5A2	4.59122	0.97667	0.598536	COL5A2	collagen type V alpha 2 chain
221729_at	0.11	0.0232	COL5A2	2.43304	-3.93615	0.566786	COL5A2	collagen type V alpha 2 chain
218975_at	0.561	0.329	COL5A3	0.997499	-6.1312	0.121299	COL5A3	collagen type V alpha 3 chain
52255_s_at	0.754	0.561	COL5A3	0.589949	-6.45346	0.064097	COL5A3	collagen type V alpha 3 chain
212939_at	0.228	0.0731	COL6A1	1.87877	-4.94907	0.123301	COL6A1	collagen type VI alpha 1 chain
212940_at	0.277	0.101	COL6A1	1.71144	-5.21843	0.179251	COL6A1	collagen type VI alpha 1 chain
212938_at	0.323	0.129	COL6A1	1.57534	-5.42318	0.1685	COL6A1	collagen type VI alpha 1 chain
212937_s_at	0.727	0.524	COL6A1	0.64664	-6.4181	0.0672287	COL6A1	collagen type VI alpha 1 chain
216904_at	0.782	0.601	COL6A1	-0.530131	-6.48736	-0.0601929	COL6A1	collagen type VI alpha 1 chain
212091_s_at	0.802	0.63	COL6A1	-0.488108	-6.50906	-0.0840422	COL6A1	collagen type VI alpha 1 chain
214200_s_at	0.942	0.872	COL6A1	0.163344	-6.61695	0.0152934	COL6A1	collagen type VI alpha 1 chain
213428_s_at	0.944	0.877	COL6A1	0.156561	-6.61807	0.0252629	COL6A1	collagen type VI alpha 1 chain
213290_at	0.113	0.0241	COL6A2	2.41542	-3.97086	0.253987	COL6A2	collagen type VI alpha 2 chain
209156_s_at	0.359	0.153	COL6A2	1.47893	-5.56	0.286355	COL6A2	collagen type VI alpha 2 chain
201438_at	0.00114	3.3e-05	COL6A3	5.14871	2.31856	2.2093	COL6A3	collagen type VI alpha 3 chain				4.48149
204136_at	0.115	0.0249	COL7A1	-2.40053	-4.00007	-0.634244	COL7A1	collagen type VII alpha 1 chain
217312_s_at	0.258	0.0893	COL7A1	1.77485	-5.11856	0.169554	COL7A1	collagen type VII alpha 1 chain
214587_at	0.673	0.454	COL8A1	0.762378	-6.33627	0.0463892	COL8A1	collagen type VIII alpha 1 chain
221152_at	0.795	0.619	COL8A1	0.503885	-6.50112	0.0386756	COL8A1	collagen type VIII alpha 1 chain
52651_at	0.0988	0.0198	COL8A2	2.50633	-3.79026	0.202913	COL8A2	collagen type VIII alpha 2 chain
221900_at	0.364	0.157	COL8A2	1.46402	-5.58051	0.152459	COL8A2	collagen type VIII alpha 2 chain
222008_at	0.461	0.233	COL9A1	-1.22569	-5.88467	-0.12655	COL9A1	collagen type IX alpha 1 chain
213622_at	0.108	0.0227	COL9A2	2.44435	-3.91381	0.372137	COL9A2	collagen type IX alpha 2 chain
204724_s_at	0.504	0.271	COL9A3	-1.12689	-5.99696	-0.206333	COL9A3	collagen type IX alpha 3 chain
217161_x_at	0.432	0.208	ACAN	1.29578	-5.8	0.146628	ACAN	aggrecan
207692_s_at	0.852	0.709	ACAN	0.378281	-6.55746	0.0305459	ACAN	aggrecan
205679_x_at	0.893	0.781	ACAN	-0.281919	-6.58993	-0.0293254	ACAN	aggrecan
219087_at	0.633	0.407	ASPN	0.844889	-6.27014	0.234452	ASPN	asporin
91920_at	0.438	0.213	BCAN	1.28047	-5.81884	0.136718	BCAN	brevican
219107_at	0.552	0.32	BCAN	1.01684	-6.11208	0.0861314	BCAN	brevican
221623_at	0.688	0.474	BCAN	0.728588	-6.36149	0.053626	BCAN	brevican
201261_x_at	0.0173	0.00145	BGN	-3.62124	-1.33872	-0.793268	BGN	biglycan
213905_x_at	0.0337	0.00389	BGN	-3.2122	-2.27871	-0.716481	BGN	biglycan
201262_s_at	0.266	0.0934	BGN	1.75102	-5.15641	0.181363	BGN	biglycan
206869_at	0.815	0.651	CHAD	0.459009	-6.52306	0.0470964	CHAD	chondroadherin
211813_x_at	0.000179	2.44e-06	DCN	-6.22576	4.85503	-1.325	DCN	decorin
209335_at	0.000623	1.41e-05	DCN	-5.49594	3.1472	-1.4849	DCN	decorin
201893_x_at	0.000635	1.46e-05	DCN	-5.48234	3.11491	-1.30862	DCN	decorin
211896_s_at	0.000875	2.33e-05	DCN	-5.28946	2.65539	-1.67638	DCN	decorin
206439_at	0.908	0.809	EPYC	0.244219	-6.60008	0.0202778	EPYC	epiphycan
208394_x_at	0.123	0.0276	ESM1	-2.35259	-4.09338	-0.701061	ESM1	endothelial cell specific molecule 1
202709_at	0.000216	3.26e-06	FMOD	6.10481	4.5758	0.742334	FMOD	fibromodulin
205524_s_at	0.00454	0.000216	HAPLN1	4.3895	0.49049	0.47572	HAPLN1	hyaluronan and proteoglycan link protein 1
205523_at	0.853	0.712	HAPLN1	-0.374151	-6.55904	-0.0235425	HAPLN1	hyaluronan and proteoglycan link protein 1
220142_at	0.961	0.91	HAPLN2	-0.114366	-6.62393	-0.017094	HAPLN2	hyaluronan and proteoglycan link protein 2
201654_s_at	0.415	0.195	HSPG2	1.33653	-5.74893	0.118068	HSPG2	heparan sulfate proteoglycan 2
201655_s_at	0.965	0.917	HSPG2	0.104864	-6.62499	0.0179901	HSPG2	heparan sulfate proteoglycan 2
207054_at	0.982	0.956	IMPG1	-0.056338	-6.62901	-0.0042384	IMPG1	interphotoreceptor matrix proteoglycan 1
220830_at	0.838	0.689	IMPG2	0.405491	-6.54659	0.0354852	IMPG2	interphotoreceptor matrix proteoglycan 2
220504_at	0.654	0.433	KERA	0.798762	-6.3079	0.0665625	KERA	keratocan
201744_s_at	0.00145	4.49e-05	LUM	5.02344	2.01788	2.37462	LUM	lumican				4.34775
205143_at	0.324	0.13	NCAN	1.57123	-5.42916	0.19281	NCAN	neurocan
221684_s_at	0.72	0.515	NYX	0.661776	-6.40813	0.0764148	NYX	nyctalopin
218730_s_at	0.13	0.0302	OGN	2.31147	-4.17253	0.197655	OGN	osteoglycin
205907_s_at	0.795	0.62	OMD	-0.502839	-6.50165	-0.0743356	OMD	osteomodulin
205908_s_at	0.906	0.805	OMD	-0.250213	-6.59856	-0.031503	OMD	osteomodulin
220411_x_at	0.18	0.0503	PODNL1	2.0663	-4.62582	0.18584	PODNL1	podocan like 1
37022_at	0.37	0.161	PRELP	1.44818	-5.60214	0.172847	PRELP	proline and arginine rich end leucine rich repeat protein
204223_at	0.785	0.605	PRELP	0.523949	-6.49066	0.107769	PRELP	proline and arginine rich end leucine rich repeat protein
211743_s_at	0.203	0.061	PRG2	1.97061	-4.79346	0.228943	PRG2	proteoglycan 2, pro eosinophil major basic protein
220811_at	0.924	0.839	PRG3	0.205336	-6.60903	0.0207555	PRG3	proteoglycan 3, pro eosinophil major basic protein 2
206007_at	0.957	0.9	PRG4	-0.126533	-6.62242	-0.0078246	PRG4	proteoglycan 4
202363_at	0.000277	4.63e-06	SPOCK1	-5.95702	4.23243	-2.72402	SPOCK1	sparc/osteonectin, cwcv and kazal-like domains proteoglycan (testican) 1
202524_s_at	9.58e-05	1.01e-06	SPOCK2	-6.60511	5.71939	-2.10133	SPOCK2	sparc/osteonectin, cwcv and kazal-like domains proteoglycan (testican) 2
202523_s_at	0.000216	3.27e-06	SPOCK2	-6.10342	4.57259	-1.15145	SPOCK2	sparc/osteonectin, cwcv and kazal-like domains proteoglycan (testican) 2
206433_s_at	0.744	0.548	SPOCK3	0.61036	-6.44109	0.0425239	SPOCK3	sparc/osteonectin, cwcv and kazal-like domains proteoglycan (testican) 3
206434_at	0.954	0.895	SPOCK3	-0.13384	-6.62145	-0.0094808	SPOCK3	sparc/osteonectin, cwcv and kazal-like domains proteoglycan (testican) 3
201858_s_at	0.621	0.394	SRGN	0.869545	-6.24915	0.262125	SRGN	serglycin
201859_at	0.723	0.519	SRGN	0.654783	-6.41277	0.117429	SRGN	serglycin
204619_s_at	0.0197	0.00177	VCAN	3.53839	-1.53179	1.27378	VCAN	versican				2.75203
211571_s_at	0.0291	0.00316	VCAN	3.29909	-2.08205	0.381958	VCAN	versican
204620_s_at	0.0619	0.00962	VCAN	2.82583	-3.12768	1.1923	VCAN	versican				2.01682
221731_x_at	0.0864	0.016	VCAN	2.60179	-3.59666	1.3296	VCAN	versican				1.79588
215646_s_at	0.182	0.0514	VCAN	2.05574	-4.64459	0.380009	VCAN	versican
201012_at	0.0859	0.0159	ANXA1	-2.60537	-3.58931	-0.907624	ANXA1	annexin A1
210143_at	0.811	0.644	ANXA10	-0.468869	-6.51841	-0.0516305	ANXA10	annexin A10
214783_s_at	0.0622	0.00972	ANXA11	-2.8216	-3.1367	-0.557973	ANXA11	annexin A11
206200_s_at	0.628	0.401	ANXA11	-0.855328	-6.26132	-0.0838476	ANXA11	annexin A11
208323_s_at	0.993	0.982	ANXA13	0.023385	-6.63035	0.0089297	ANXA13	annexin A13
213503_x_at	1.65e-06	1.85e-09	ANXA2	-9.57337	11.7934	-1.47771	ANXA2	annexin A2
210427_x_at	1.66e-06	1.94e-09	ANXA2	-9.54968	11.7499	-1.42807	ANXA2	annexin A2
201590_x_at	1.76e-06	2.39e-09	ANXA2	-9.44173	11.5508	-1.46271	ANXA2	annexin A2
209369_at	0.292	0.11	ANXA3	1.6644	-5.2907	0.535252	ANXA3	annexin A3
201302_at	0.0432	0.00556	ANXA4	3.0611	-2.61606	0.648805	ANXA4	annexin A4
201301_s_at	0.775	0.591	ANXA4	0.544798	-6.47937	0.140922	ANXA4	annexin A4
200782_at	0.607	0.377	ANXA5	-0.90076	-6.22176	-0.221807	ANXA5	annexin A5
200982_s_at	0.526	0.294	ANXA6	1.0752	-6.05236	0.243252	ANXA6	annexin A6
201366_at	0.242	0.0806	ANXA7	1.82861	-5.03177	0.219529	ANXA7	annexin A7
209860_s_at	0.881	0.759	ANXA7	0.310568	-6.58126	0.0807477	ANXA7	annexin A7
211712_s_at	0.29	0.108	ANXA9	-1.67257	-5.27826	-0.395712	ANXA9	annexin A9
210085_s_at	0.617	0.39	ANXA9	0.876062	-6.2435	0.173059	ANXA9	annexin A9
218232_at	9.55e-06	3.04e-08	C1QA	8.18604	9.1123	1.92228	C1QA	complement C1q A chain				7.51713
202953_at	5.44e-05	4.22e-07	C1QB	6.98444	6.56531	2.20469	C1QB	complement C1q B chain				6.37469
205575_at	0.127	0.029	C1QL1	-2.32965	-4.13763	-0.515512	C1QL1	complement C1q like 1
214346_at	0.651	0.429	C1QL1	-0.805999	-6.30211	-0.184182	C1QL1	complement C1q like 1
220975_s_at	0.819	0.657	C1QTNF1	0.449749	-6.52733	0.056501	C1QTNF1	C1q and tumor necrosis factor related protein 1
220988_s_at	0.472	0.242	C1QTNF3	1.20019	-5.91444	0.17615	C1QTNF3	C1q and tumor necrosis factor related protein 3
206207_at	0.12	0.0265	CLC	2.37189	-4.05594	0.849797	CLC	Charcot-Leyden crystal galectin
206682_at	0.00033	6.1e-06	CLEC10A	5.84185	3.96325	1.00523	CLEC10A	C-type lectin domain family 10 member A				5.21467
210783_x_at	0.37	0.161	CLEC11A	1.4501	-5.59953	0.21211	CLEC11A	C-type lectin domain family 11 member A
211709_s_at	0.537	0.304	CLEC11A	1.05133	-6.07714	0.299614	CLEC11A	C-type lectin domain family 11 member A
205131_x_at	0.612	0.384	CLEC11A	0.887072	-6.23388	0.16592	CLEC11A	C-type lectin domain family 11 member A
219761_at	0.0509	0.00705	CLEC1A	-2.95987	-2.83837	-0.589752	CLEC1A	C-type lectin domain family 1 member A
220496_at	0.336	0.137	CLEC1B	1.54016	-5.47392	0.196211	CLEC1B	C-type lectin domain family 1 member B
220132_s_at	0.0431	0.00554	CLEC2D	3.06279	-2.61232	0.166504	CLEC2D	C-type lectin domain family 2 member D
219859_at	0.337	0.138	CLEC4E	1.53619	-5.47959	0.137984	CLEC4E	C-type lectin domain family 4 member E
219890_at	0.71	0.502	CLEC5A	0.682696	-6.39399	0.0539006	CLEC5A	C-type lectin domain family 5 member A
221698_s_at	0.0437	0.00567	CLEC7A	3.0531	-2.63375	0.833852	CLEC7A	C-type lectin domain family 7 member A
207420_at	0.735	0.537	COLEC10	-0.626322	-6.43114	-0.058957	COLEC10	collectin subfamily member 10
219873_at	0.472	0.242	COLEC11	1.19992	-5.91476	0.283022	COLEC11	collectin subfamily member 11
221019_s_at	0.96	0.907	COLEC12	-0.117651	-6.62354	-0.0405658	COLEC12	collectin subfamily member 12
214297_at	0.485	0.255	CSPG4	-1.16807	-5.95117	-0.189881	CSPG4	chondroitin sulfate proteoglycan 4
204736_s_at	0.896	0.786	CSPG4	-0.274424	-6.59207	-0.0256771	CSPG4	chondroitin sulfate proteoglycan 4
39966_at	0.129	0.0301	CSPG5	2.31277	-4.17004	0.174076	CSPG5	chondroitin sulfate proteoglycan 5
205344_at	0.493	0.261	CSPG5	1.1528	-5.96832	0.160729	CSPG5	chondroitin sulfate proteoglycan 5
219436_s_at	0.000978	2.69e-05	EMCN	-5.23133	2.51642	-2.08763	EMCN	endomucin
202755_s_at	0.0939	0.0183	GPC1	2.54238	-3.7176	0.233385	GPC1	glypican 1
202756_s_at	0.768	0.582	GPC1	-0.558789	-6.47156	-0.0877885	GPC1	glypican 1
209220_at	0.677	0.46	GPC3	0.750888	-6.34497	0.222194	GPC3	glypican 3
204984_at	0.048	0.00648	GPC4	-2.99613	-2.7591	-0.5565	GPC4	glypican 4
204983_s_at	0.26	0.0903	GPC4	1.76849	-5.12871	0.365793	GPC4	glypican 4
207174_at	0.213	0.0659	GPC5	-1.93196	-4.8596	-0.780225	GPC5	glypican 5
218469_at	0.109	0.0231	GREM1	2.43642	-3.92947	0.497061	GREM1	gremlin 1, DAN family BMP antagonist
218468_s_at	0.136	0.0327	GREM1	2.27426	-4.2434	0.265024	GREM1	gremlin 1, DAN family BMP antagonist
39763_at	0.586	0.354	HPX	0.945706	-6.18074	0.144677	HPX	hemopexin
210013_at	0.774	0.589	HPX	0.547327	-6.47798	0.0816423	HPX	hemopexin
201105_at	0.492	0.26	LGALS1	-1.15442	-5.96651	-0.715378	LGALS1	galectin 1
208450_at	0.0294	0.00321	LGALS2	3.29176	-2.09873	0.859456	LGALS2	galectin 2
208949_s_at	0.0815	0.0147	LGALS3	2.63993	-3.5182	0.559575	LGALS3	lectin, galactoside binding soluble 3
204272_at	0.349	0.146	LGALS4	1.50618	-5.52204	0.161943	LGALS4	galectin 4
208933_s_at	2.43e-09	1.26e-13	LGALS8	-15.5259	20.5619	-2.43552	LGALS8	galectin 8
208934_s_at	1.1e-05	3.89e-08	LGALS8	-8.07056	8.87656	-1.60562	LGALS8	galectin 8
208935_s_at	1.89e-05	9.23e-08	LGALS8	-7.66807	8.03979	-1.96953	LGALS8	galectin 8
208936_x_at	2.98e-05	1.68e-07	LGALS8	-7.39429	7.45723	-1.60998	LGALS8	galectin 8
210731_s_at	0.000118	1.41e-06	LGALS8	-6.46064	5.3923	-1.57765	LGALS8	galectin 8
210732_s_at	0.334	0.136	LGALS8	-1.54365	-5.46892	-0.184073	LGALS8	galectin 8
203236_s_at	0.0126	0.000931	LGALS9	3.80042	-0.91753	0.432374	LGALS9	galectin 9
219998_at	0.144	0.0359	LGALSL	2.23021	-4.32636	0.264022	LGALSL	galectin like
203294_s_at	0.68	0.464	LMAN1	-0.744558	-6.3497	-0.0759593	LMAN1	lectin, mannose binding 1
203293_s_at	0.684	0.469	LMAN1	0.736389	-6.35576	0.0997341	LMAN1	lectin, mannose binding 1
220420_at	0.156	0.0401	LMAN1L	2.17636	-4.4264	0.239771	LMAN1L	lectin, mannose binding 1 like
207256_at	0.227	0.0723	MBL2	1.8843	-4.93984	0.17565	MBL2	mannose binding lectin 2
213693_s_at	0.0142	0.0011	MUC1	3.73351	-1.07536	1.22397	MUC1	mucin 1, cell surface associated				2.95861
207847_s_at	0.017	0.00141	MUC1	3.6313	-1.31522	0.833196	MUC1	mucin 1, cell surface associated
211695_x_at	0.0521	0.00734	MUC1	2.94267	-2.87584	0.388392	MUC1	mucin 1, cell surface associated
218687_s_at	0.824	0.665	MUC13	-0.4383	-6.5325	-0.162504	MUC13	mucin 13, cell surface associated
220196_at	0.572	0.34	MUC16	0.974964	-6.15305	0.0874338	MUC16	mucin 16, cell surface associated
204673_at	0.434	0.209	MUC2	1.29153	-5.80525	0.152315	MUC2	mucin 2, oligomeric mucus/gel-forming
217109_at	0.186	0.0528	MUC4	2.04256	-4.66792	0.155896	MUC4	mucin 4, cell surface associated
204895_x_at	0.756	0.564	MUC4	0.58586	-6.45589	0.0411803	MUC4	mucin 4, cell surface associated
217110_s_at	0.758	0.567	MUC4	0.581185	-6.45865	0.0434217	MUC4	mucin 4, cell surface associated
217182_at	0.0168	0.00139	MUC5AC	3.63645	-1.30317	0.288689	MUC5AC	mucin 5AC, oligomeric mucus/gel-forming
217187_at	0.136	0.0327	MUC5AC	2.27395	-4.24399	0.366686	MUC5AC	mucin 5AC, oligomeric mucus/gel-forming
214385_s_at	0.371	0.162	MUC5AC	1.44581	-5.60536	0.178195	MUC5AC	mucin 5AC, oligomeric mucus/gel-forming
214303_x_at	0.924	0.838	MUC5AC	0.206826	-6.60871	0.0178678	MUC5AC	mucin 5AC, oligomeric mucus/gel-forming
222268_x_at	0.133	0.0315	MUC5B	2.29142	-4.21079	0.290143	MUC5B	mucin 5B, oligomeric mucus/gel-forming
213432_at	0.761	0.571	MUC5B	-0.574206	-6.46272	-0.055536	MUC5B	mucin 5B, oligomeric mucus/gel-forming
214133_at	0.355	0.15	MUC6	1.48973	-5.54502	0.158002	MUC6	mucin 6, oligomeric mucus/gel-forming
205432_at	0.168	0.0453	OVGP1	2.11805	-4.5329	0.252991	OVGP1	oviductal glycoprotein 1
204687_at	0.0354	0.00418	PARM1	3.18205	-2.34654	0.800887	PARM1	prostate androgen-regulated mucin-like protein 1
219700_at	0.00607	0.000336	PLXDC1	4.21175	0.06308	0.443401	PLXDC1	plexin domain containing 1
214081_at	0.04	0.00497	PLXDC1	3.10903	-2.50973	0.435359	PLXDC1	plexin domain containing 1
214807_at	0.936	0.86	PLXDC2	-0.17888	-6.61423	-0.0457707	PLXDC2	plexin domain containing 2
221537_at	0.0152	0.0012	PLXNA1	3.69785	-1.1592	0.31014	PLXNA1	plexin A1
221538_s_at	0.0487	0.00662	PLXNA1	-2.98684	-2.77945	-0.811424	PLXNA1	plexin A1
213030_s_at	0.0787	0.0139	PLXNA2	-2.66485	-3.46663	-0.384694	PLXNA2	plexin A2
207290_at	1	1	PLXNA2	0.000198	-6.63063	2.91e-05	PLXNA2	plexin A2
203623_at	0.0243	0.00242	PLXNA3	-3.40887	-1.83109	-0.455012	PLXNA3	plexin A3
215807_s_at	0.204	0.0613	PLXNB1	1.96847	-4.79715	0.522287	PLXNB1	plexin B1
215668_s_at	0.501	0.269	PLXNB1	1.13264	-5.99066	0.179498	PLXNB1	plexin B1
208890_s_at	0.201	0.0602	PLXNB2	-1.97747	-4.78162	-0.529935	PLXNB2	plexin B2
211472_at	0.999	0.995	PLXNB2	-0.005956	-6.63062	-0.00073	PLXNB2	plexin B2
205957_at	0.955	0.898	PLXNB3	-0.130191	-6.62194	-0.0147442	PLXNB3	plexin B3
213241_at	0.24	0.0792	PLXNC1	-1.8374	-5.01739	-0.432541	PLXNC1	plexin C1
206470_at	0.377	0.167	PLXNC1	1.42878	-5.62835	0.110175	PLXNC1	plexin C1
206471_s_at	0.851	0.707	PLXNC1	-0.380328	-6.55667	-0.0357102	PLXNC1	plexin C1
212235_at	0.078	0.0136	PLXND1	-2.67282	-3.45009	-0.833433	PLXND1	plexin D1
38671_at	0.174	0.0477	PLXND1	-2.09226	-4.5794	-0.618934	PLXND1	plexin D1
205815_at	0.484	0.253	REG3A	1.17182	-5.94693	0.107436	REG3A	regenerating family member 3 alpha
201287_s_at	0.129	0.0299	SDC1	2.3161	-4.16366	0.575639	SDC1	syndecan 1
201286_at	0.628	0.401	SDC1	0.85615	-6.26062	0.260713	SDC1	syndecan 1
212158_at	1.12e-05	4.03e-08	SDC2	-8.05389	8.84238	-1.3604	SDC2	syndecan 2
212154_at	0.00156	4.96e-05	SDC2	-4.98333	1.92145	-0.709643	SDC2	syndecan 2
212157_at	0.00627	0.000351	SDC2	-4.1941	0.02072	-0.828275	SDC2	syndecan 2
202898_at	0.273	0.0978	SDC3	-1.72639	-5.19513	-0.294931	SDC3	syndecan 3
202071_at	0.718	0.512	SDC4	-0.665948	-6.40535	-0.118121	SDC4	syndecan 4
206805_at	0.992	0.978	SEMA3A	-0.028341	-6.63022	-0.0024197	SEMA3A	semaphorin 3A
203070_at	0.666	0.446	SEMA3B	0.776064	-6.32574	0.0778901	SEMA3B	semaphorin 3B
203789_s_at	0.139	0.0335	SEMA3C	-2.26224	-4.26614	-0.827444	SEMA3C	semaphorin 3C
203788_s_at	0.512	0.279	SEMA3C	1.10875	-6.01667	0.0993005	SEMA3C	semaphorin 3C
215643_at	0.715	0.509	SEMA3D	-0.671017	-6.40194	-0.0554722	SEMA3D	semaphorin 3D
215324_at	0.95	0.887	SEMA3D	0.143132	-6.62013	0.0081996	SEMA3D	semaphorin 3D
206941_x_at	0.937	0.861	SEMA3E	0.177279	-6.61452	0.0127491	SEMA3E	semaphorin 3E
209730_at	0.367	0.159	SEMA3F	1.4549	-5.59299	0.204095	SEMA3F	semaphorin 3F
206832_s_at	0.867	0.734	SEMA3F	0.343433	-6.57029	0.0380286	SEMA3F	semaphorin 3F
35666_at	0.877	0.754	SEMA3F	0.317471	-6.57905	0.0814125	SEMA3F	semaphorin 3F
219689_at	0.000132	1.66e-06	SEMA3G	-6.39128	5.23434	-2.70587	SEMA3G	semaphorin 3G
219259_at	0.477	0.247	SEMA4A	1.18793	-5.92856	0.166546	SEMA4A	semaphorin 4A
46665_at	0.671	0.452	SEMA4C	-0.76506	-6.33422	-0.193225	SEMA4C	semaphorin 4C
219039_at	0.764	0.576	SEMA4C	-0.567185	-6.46678	-0.0994444	SEMA4C	semaphorin 4C
203528_at	0.71	0.501	SEMA4D	0.683038	-6.39376	0.142482	SEMA4D	semaphorin 4D
210124_x_at	0.168	0.0454	SEMA4F	-2.11682	-4.53513	-0.436865	SEMA4F	ssemaphorin 4F
208124_s_at	0.755	0.563	SEMA4F	0.587106	-6.45515	0.0748111	SEMA4F	ssemaphorin 4F
219194_at	0.434	0.21	SEMA4G	-1.29096	-5.80596	-0.124203	SEMA4G	semaphorin 4G
203483_at	0.926	0.841	SEMA4G	0.202905	-6.60953	0.0293249	SEMA4G	semaphorin 4G
205405_at	2.35e-06	4.08e-09	SEMA5A	-9.16875	11.0399	-2.43043	SEMA5A	semaphorin 5A
213169_at	0.00114	3.3e-05	SEMA5A	-5.14866	2.31843	-1.55432	SEMA5A	semaphorin 5A
215028_at	0.402	0.184	SEMA6A	-1.36988	-5.70612	-0.19361	SEMA6A	semaphorin 6A
220454_s_at	0.91	0.813	SEMA6A	-0.239036	-6.60136	-0.0427072	SEMA6A	semaphorin 6A
220778_x_at	0.129	0.03	SEMA6B	2.31497	-4.16582	0.259792	SEMA6B	semaphorin 6B
208100_x_at	0.31	0.12	SEMA6C	1.6131	-5.36771	0.216697	SEMA6C	semaphorin 6C
220574_at	0.993	0.98	SEMA6D	-0.02591	-6.63029	-0.003121	SEMA6D	semaphorin 6D
210083_at	0.448	0.222	SEMA7A	1.25583	-5.84876	0.190477	SEMA7A	semaphorin 7A (John Milton Hagen blood group)
213936_x_at	0.142	0.0347	SFTPB	2.24567	-4.29736	0.357506	SFTPB	surfactant protein B
209810_at	0.377	0.166	SFTPB	1.42949	-5.62739	0.21651	SFTPB	surfactant protein B
37004_at	0.484	0.254	SFTPB	1.17038	-5.94856	0.0885958	SFTPB	surfactant protein B
214354_x_at	0.953	0.893	SFTPB	0.13585	-6.62117	0.0202316	SFTPB	surfactant protein B
38691_s_at	0.00666	0.000379	SFTPC	4.1636	-0.05243	0.514306	SFTPC	surfactant protein C
215454_x_at	0.17	0.0459	SFTPC	2.11086	-4.54591	0.292619	SFTPC	surfactant protein C
214387_x_at	0.714	0.508	SFTPC	0.673212	-6.40045	0.0802971	SFTPC	surfactant protein C
205982_x_at	0.813	0.647	SFTPC	0.463371	-6.52101	0.0602668	SFTPC	surfactant protein C
211735_x_at	0.843	0.695	SFTPC	-0.397191	-6.54999	-0.0371711	SFTPC	surfactant protein C
214199_at	0.482	0.252	SFTPD	-1.17653	-5.94158	-0.119329	SFTPD	surfactant protein D
217757_at	0.831	0.675	A2M	0.424279	-6.53866	0.142904	A2M	alpha-2-macroglobulin
202603_at	0.237	0.0777	ADAM10	1.84708	-5.0015	0.364149	ADAM10	ADAM metallopeptidase domain 10
214895_s_at	0.31	0.121	ADAM10	1.61177	-5.36969	0.237786	ADAM10	ADAM metallopeptidase domain 10
202604_x_at	0.471	0.242	ADAM10	1.20146	-5.91298	0.161075	ADAM10	ADAM metallopeptidase domain 10
207880_at	0.525	0.293	ADAM11	-1.07607	-6.05145	-0.164006	ADAM11	ADAM metallopeptidase domain 11
204943_at	0.0655	0.0105	ADAM12	2.78869	-3.20675	0.271124	ADAM12	ADAM metallopeptidase domain 12
213790_at	0.101	0.0205	ADAM12	2.49067	-3.82163	0.339049	ADAM12	ADAM metallopeptidase domain 12
202952_s_at	0.118	0.0257	ADAM12	2.38592	-4.02862	0.455003	ADAM12	ADAM metallopeptidase domain 12
215613_at	0.623	0.396	ADAM12	0.865222	-6.25287	0.0900434	ADAM12	ADAM metallopeptidase domain 12
217007_s_at	0.136	0.0327	ADAM15	2.27399	-4.24392	0.314647	ADAM15	ADAM metallopeptidase domain 15
205745_x_at	0.0445	0.00587	ADAM17	-3.03841	-2.66617	-0.555266	ADAM17	ADAM metallopeptidase domain 17
213532_at	0.14	0.0342	ADAM17	-2.25257	-4.28438	-0.401965	ADAM17	ADAM metallopeptidase domain 17
205746_s_at	0.758	0.567	ADAM17	-0.580148	-6.45926	-0.0430771	ADAM17	ADAM metallopeptidase domain 17
207597_at	0.863	0.728	ADAM18	0.351648	-6.56737	0.0332622	ADAM18	ADAM metallopeptidase domain 18
209765_at	0.187	0.0535	ADAM19	2.03617	-4.6792	0.387661	ADAM19	ADAM metallopeptidase domain 19
221128_at	0.859	0.72	ADAM19	0.36313	-6.56319	0.0471742	ADAM19	ADAM metallopeptidase domain 19
207664_at	0.969	0.925	ADAM2	0.095108	-6.62599	0.007839	ADAM2	ADAM metallopeptidase domain 2
207422_at	0.324	0.13	ADAM20	-1.57261	-5.42716	-0.152538	ADAM20	ADAM metallopeptidase domain 20
207423_s_at	0.337	0.138	ADAM20	1.53633	-5.47938	0.133413	ADAM20	ADAM metallopeptidase domain 20
207665_at	0.477	0.247	ADAM21	1.18758	-5.92897	0.0710659	ADAM21	ADAM metallopeptidase domain 21
213411_at	0.00153	4.8e-05	ADAM22	4.9962	1.95241	0.572039	ADAM22	ADAM metallopeptidase domain 22
208226_x_at	0.119	0.0262	ADAM22	2.37768	-4.04468	0.257144	ADAM22	ADAM metallopeptidase domain 22
208227_x_at	0.156	0.0404	ADAM22	2.17362	-4.43144	0.222116	ADAM22	ADAM metallopeptidase domain 22
208237_x_at	0.266	0.0938	ADAM22	1.74846	-5.16046	0.206082	ADAM22	ADAM metallopeptidase domain 22
206615_s_at	0.283	0.104	ADAM22	1.69311	-5.24677	0.115199	ADAM22	ADAM metallopeptidase domain 22
206616_s_at	0.549	0.316	ADAM22	1.02549	-6.10341	0.0852249	ADAM22	ADAM metallopeptidase domain 22
213808_at	0.0959	0.0189	ADAM23	2.52648	-3.74972	0.197085	ADAM23	ADAM metallopeptidase domain 23
206046_at	0.325	0.13	ADAM23	1.56959	-5.43154	0.107087	ADAM23	ADAM metallopeptidase domain 23
208269_s_at	0.118	0.0257	ADAM28	2.38629	-4.0279	0.296903	ADAM28	ADAM metallopeptidase domain 28
208268_at	0.377	0.166	ADAM28	1.42957	-5.62729	0.235462	ADAM28	ADAM metallopeptidase domain 28
205997_at	0.708	0.498	ADAM28	-0.687816	-6.39046	-0.179073	ADAM28	ADAM metallopeptidase domain 28
221446_at	0.383	0.17	ADAM30	-1.41558	-5.64602	-0.208818	ADAM30	ADAM metallopeptidase domain 30
217003_s_at	0.771	0.585	ADAM5	0.553618	-6.47447	0.0553163	ADAM5	ADAM metallopeptidase domain 5 (pseudogene)
216998_s_at	0.815	0.649	ADAM5	0.460936	-6.52216	0.0529664	ADAM5	ADAM metallopeptidase domain 5 (pseudogene)
211239_s_at	0.32	0.127	ADAM7	1.58411	-5.41039	0.115153	ADAM7	ADAM metallopeptidase domain 7
211238_at	0.418	0.197	ADAM7	1.33029	-5.75684	0.0976571	ADAM7	ADAM metallopeptidase domain 7
205180_s_at	0.00186	6.35e-05	ADAM8	4.88296	1.67993	0.693218	ADAM8	ADAM metallopeptidase domain 8
205179_s_at	0.89	0.776	ADAM8	0.287818	-6.58822	0.0282973	ADAM8	ADAM metallopeptidase domain 8
202381_at	0.5	0.268	ADAM9	-1.13656	-5.98634	-0.235392	ADAM9	ADAM metallopeptidase domain 9
206134_at	0.101	0.0206	ADAMDEC1	2.48871	-3.82557	1.02034	ADAMDEC1	ADAM like decysin 1				1.68613
222162_s_at	0.861	0.724	ADAMTS1	-0.357606	-6.56522	-0.140187	ADAMTS1	ADAM metallopeptidase with thrombospondin type 1 motif 1
221421_s_at	0.566	0.334	ADAMTS12	0.987047	-6.14139	0.1069	ADAMTS12	ADAM metallopeptidase with thrombospondin type 1 motif 12
220208_at	0.368	0.16	ADAMTS13	1.45397	-5.59426	0.102135	ADAMTS13	ADAM metallopeptidase with thrombospondin type 1 motif 13
214535_s_at	0.0903	0.0172	ADAMTS2	2.56991	-3.66175	0.272994	ADAMTS2	ADAM metallopeptidase with thrombospondin type 1 motif 2
214454_at	0.666	0.446	ADAMTS2	0.775599	-6.3261	0.0901738	ADAMTS2	ADAM metallopeptidase with thrombospondin type 1 motif 2
220717_at	0.163	0.0431	ADAMTS20	2.14188	-4.4896	0.183202	ADAMTS20	ADAM metallopeptidase with thrombospondin type 1 motif 20
214913_at	0.535	0.303	ADAMTS3	1.05486	-6.07351	0.160398	ADAMTS3	ADAM metallopeptidase with thrombospondin type 1 motif 3
219935_at	0.932	0.853	ADAMTS5	-0.187408	-6.61263	-0.0655822	ADAMTS5	ADAM metallopeptidase with thrombospondin type 1 motif 5
220866_at	0.61	0.381	ADAMTS6	0.892903	-6.22874	0.0915185	ADAMTS6	ADAM metallopeptidase with thrombospondin type 1 motif 6
220705_s_at	0.0868	0.0161	ADAMTS7	2.59807	-3.60426	0.288044	ADAMTS7	ADAM metallopeptidase with thrombospondin type 1 motif 7
220706_at	0.426	0.203	ADAMTS7	1.31147	-5.7805	0.16148	ADAMTS7	ADAM metallopeptidase with thrombospondin type 1 motif 7
220676_at	0.565	0.333	ADAMTS8	0.989658	-6.13885	0.0935802	ADAMTS8	ADAM metallopeptidase with thrombospondin type 1 motif 8
220677_s_at	0.776	0.593	ADAMTS8	-0.542442	-6.48067	-0.0504617	ADAMTS8	ADAM metallopeptidase with thrombospondin type 1 motif 8
220287_at	0.537	0.305	ADAMTS9	-1.04973	-6.0788	-0.169708	ADAMTS9	ADAM metallopeptidase with thrombospondin type 1 motif 9
206629_at	0.0357	0.00423	ADAMTSL2	3.17653	-2.35891	0.324577	ADAMTSL2	ADAMTS like 2
213974_at	0.0154	0.00122	ADAMTSL3	3.69155	-1.17402	0.966394	ADAMTSL3	ADAMTS like 3
220578_at	0.93	0.851	ADAMTSL4	-0.190331	-6.61207	-0.0222284	ADAMTSL4	ADAMTS like 4
202834_at	0.494	0.262	AGT	1.14946	-5.97205	0.506246	AGT	angiotensinogen
214425_at	0.197	0.058	AMBP	1.99615	-4.74925	0.226138	AMBP	alpha-1-microglobulin/bikunin precursor
205477_s_at	0.232	0.0753	AMBP	1.86365	-4.97416	0.689842	AMBP	alpha-1-microglobulin/bikunin precursor
202701_at	0.0944	0.0185	BMP1	-2.53771	-3.72706	-0.40416	BMP1	bone morphogenetic protein 1
206725_x_at	0.476	0.246	BMP1	1.19031	-5.92583	0.167151	BMP1	bone morphogenetic protein 1
207595_s_at	0.826	0.667	BMP1	0.435517	-6.53374	0.0494911	BMP1	bone morphogenetic protein 1
205574_x_at	0.968	0.923	BMP1	-0.097458	-6.62576	-0.0154294	BMP1	bone morphogenetic protein 1
206151_x_at	0.194	0.0567	CELA3B	2.00713	-4.73013	0.183721	CELA3B	chymotrypsin like elastase family member 3B
216223_at	0.615	0.388	CPN2	0.880206	-6.23989	0.279848	CPN2	carboxypeptidase N subunit 2
201360_at	0.205	0.062	CST3	1.96245	-4.8075	0.80176	CST3	cystatin C
206595_at	0.00281	0.00011	CST6	4.66204	1.14745	1.03924	CST6	cystatin E/M				3.95861
210140_at	0.2	0.0596	CST7	1.98212	-4.77359	0.393346	CST7	cystatin F
220627_at	0.48	0.25	CST8	1.17955	-5.93814	0.137638	CST8	cystatin 8
201201_at	0.649	0.426	CSTB	0.809979	-6.2989	0.187265	CSTB	cystatin B
200661_at	0.246	0.0826	CTSA	1.81564	-5.05289	0.759249	CTSA	cathepsin A
213275_x_at	0.0688	0.0113	CTSB	2.75635	-3.27518	0.555507	CTSB	cathepsin B
200839_s_at	0.0951	0.0187	CTSB	2.53194	-3.73872	0.569687	CTSB	cathepsin B
200838_at	0.111	0.0235	CTSB	2.4279	-3.9463	1.02383	CTSB	cathepsin B				1.62893
213274_s_at	0.389	0.175	CTSB	1.40106	-5.66529	0.435047	CTSB	cathepsin B
201487_at	0.203	0.0609	CTSC	1.97142	-4.79206	0.474104	CTSC	cathepsin C
200766_at	0.248	0.0835	CTSD	1.80958	-5.06272	0.634927	CTSD	cathepsin D
205927_s_at	0.232	0.0753	CTSE	1.86332	-4.97472	0.580701	CTSE	cathepsin E
203657_s_at	0.028	0.00298	CTSF	3.32348	-2.02653	0.572486	CTSF	cathepsin F
205653_at	0.00284	0.000112	CTSG	4.6552	1.13097	0.716559	CTSG	cathepsin G
202295_s_at	0.128	0.0297	CTSH	2.31943	-4.15727	0.716337	CTSH	cathepsin H
202450_s_at	0.0691	0.0113	CTSK	2.75429	-3.27951	0.634664	CTSK	cathepsin K
202087_s_at	0.897	0.788	CTSL	-0.271616	-6.59285	-0.0727183	CTSL	cathepsin L
203758_at	0.0297	0.00325	CTSO	-3.2874	-2.10862	-0.965356	CTSO	cathepsin O
202902_s_at	0.0374	0.00452	CTSS	3.14884	-2.42093	1.14463	CTSS	cathepsin S				2.34486
202901_x_at	0.0495	0.00678	CTSS	2.97658	-2.8019	0.58686	CTSS	cathepsin S
214450_at	0.0618	0.00959	CTSW	2.82731	-3.12452	0.273062	CTSW	cathepsin W
212562_s_at	0.21	0.0643	CTSZ	1.94385	-4.83935	0.214742	CTSZ	cathepsin Z
210042_s_at	0.667	0.447	CTSZ	-0.774219	-6.32717	-0.274699	CTSZ	cathepsin Z
221497_x_at	0.993	0.98	EGLN1	0.025558	-6.6303	0.004787	EGLN1	egl-9 family hypoxia inducible factor 1
219232_s_at	0.0702	0.0116	EGLN3	2.74328	-3.30272	0.623983	EGLN3	egl-9 family hypoxia inducible factor 3
206871_at	0.987	0.967	ELANE	-0.042035	-6.62973	-0.0050029	ELANE	elastase, neutrophil expressed
205620_at	0.546	0.314	F10	1.03012	-6.09875	0.131896	F10	coagulation factor X
205774_at	0.00717	0.00042	F12	4.1222	-0.15162	0.68715	F12	coagulation factor XII
215961_at	0.819	0.657	F12	0.450453	-6.52701	0.0700836	F12	coagulation factor XII
203305_at	0.307	0.118	F13A1	1.62454	-5.35071	0.508591	F13A1	coagulation factor XIII A chain
207810_at	0.238	0.0782	F13B	1.84398	-5.0066	0.14856	F13B	coagulation factor XIII B chain
205754_at	0.776	0.593	F2	0.541796	-6.48103	0.0826782	F2	coagulation factor II, thrombin
207300_s_at	0.24	0.0794	F7	1.83603	-5.01964	0.217653	F7	coagulation factor VII
207218_at	0.722	0.517	F9	-0.657824	-6.41076	-0.0588706	F9	coagulation factor IX
202916_s_at	5.04e-06	1.18e-08	FAM20B	-8.64342	10.0269	-1.28699	FAM20B	family with sequence similarity 20 member B
202915_s_at	0.0119	0.000863	FAM20B	-3.8311	-0.84499	-0.768623	FAM20B	family with sequence similarity 20 member B
206010_at	0.029	0.00312	HABP2	3.3035	-2.07202	1.22069	HABP2	hyaluronan binding protein 2				2.50585
219403_s_at	0.511	0.278	HPSE	1.11166	-6.01352	0.189369	HPSE	heparanase
220927_s_at	0.224	0.0709	HPSE2	1.89473	-4.92241	0.235459	HPSE2	heparanase 2 (inactive)
206226_at	0.00125	3.71e-05	HRG	-5.1008	2.20365	-1.64356	HRG	histidine rich glycoprotein
31835_at	0.0182	0.00156	HRG	-3.58896	-1.41407	-0.436323	HRG	histidine rich glycoprotein
201185_at	0.000184	2.55e-06	HTRA1	-6.20746	4.81289	-1.86469	HTRA1	HtrA serine peptidase 1
210619_s_at	0.828	0.671	HYAL1	0.430549	-6.53593	0.140286	HYAL1	hyaluronoglucosaminidase 1
206855_s_at	0.437	0.212	HYAL2	-1.2835	-5.81513	-0.333422	HYAL2	hyaluronoglucosaminidase 2
211728_s_at	0.11	0.0232	HYAL3	2.43258	-3.93705	0.250835	HYAL3	hyaluronoglucosaminidase 3
220249_at	0.601	0.371	HYAL4	0.913258	-6.21054	0.089475	HYAL4	hyaluronoglucosaminidase 4
210888_s_at	0.29	0.108	ITIH1	1.67216	-5.27887	0.208518	ITIH1	inter-alpha-trypsin inhibitor heavy chain 1
204987_at	0.084	0.0154	ITIH2	-2.61889	-3.56155	-0.481227	ITIH2	inter-alpha-trypsin inhibitor heavy chain 2
205755_at	0.889	0.774	ITIH3	-0.291166	-6.58723	-0.0393249	ITIH3	inter-alpha-trypsin inhibitor heavy chain 3
206287_s_at	0.825	0.666	ITIH4	0.437234	-6.53298	0.0573388	ITIH4	inter-alpha-trypsin inhibitor heavy chain family member 4
37201_at	0.828	0.671	ITIH4	-0.429752	-6.53628	-0.0635509	ITIH4	inter-alpha-trypsin inhibitor heavy chain family member 4
219064_at	0.000831	2.11e-05	ITIH5	-5.3302	2.75268	-1.91448	ITIH5	inter-alpha-trypsin inhibitor heavy chain family member 5
217511_at	0.0541	0.00779	KAZALD1	2.91715	-2.93123	0.347449	KAZALD1	Kazal type serine peptidase inhibitor domain 1
221000_s_at	0.73	0.529	KAZALD1	-0.639238	-6.4229	-0.0749696	KAZALD1	Kazal type serine peptidase inhibitor domain 1
206054_at	0.38	0.168	KNG1	-1.42269	-5.63651	-0.674591	KNG1	kininogen 1
217512_at	0.878	0.755	KNG1	0.31627	-6.57944	0.096089	KNG1	kininogen 1
204298_s_at	2.43e-09	2.18e-13	LOX	-15.1235	20.085	-2.9772	LOX	lysyl oxidase
215446_s_at	1.62e-05	7.04e-08	LOX	-7.79282	8.30165	-3.13438	LOX	lysyl oxidase
213640_s_at	0.67	0.451	LOX	-0.7667	-6.33296	-0.0839394	LOX	lysyl oxidase
203570_at	0.126	0.0286	LOXL1	-2.33645	-4.12456	-0.646215	LOXL1	lysyl oxidase like 1
202998_s_at	0.133	0.0312	LOXL2	2.29538	-4.20327	0.415165	LOXL2	lysyl oxidase like 2
202997_s_at	0.483	0.253	LOXL2	1.17388	-5.94459	0.136475	LOXL2	lysyl oxidase like 2
202999_s_at	0.803	0.632	LOXL2	0.485484	-6.51036	0.0681402	LOXL2	lysyl oxidase like 2
213749_at	0.106	0.022	MASP1	2.45723	-3.88828	0.265702	MASP1	mannan binding lectin serine peptidase 1
206449_s_at	0.181	0.0509	MASP1	2.06045	-4.63623	0.156246	MASP1	mannan binding lectin serine peptidase 1
210680_s_at	0.495	0.263	MASP1	1.14809	-5.97357	0.0908234	MASP1	mannan binding lectin serine peptidase 1
207041_at	0.542	0.309	MASP2	1.03943	-6.08932	0.0680335	MASP2	mannan binding lectin serine peptidase 2
216968_at	0.637	0.412	MASP2	0.835766	-6.27777	0.095164	MASP2	mannan binding lectin serine peptidase 2
210798_x_at	0.748	0.552	MASP2	0.602965	-6.44562	0.0777051	MASP2	mannan binding lectin serine peptidase 2
206000_at	0.999	0.997	MEP1A	-0.004314	-6.63062	-0.0004246	MEP1A	meprin A subunit alpha
207251_at	0.341	0.14	MEP1B	1.52712	-5.49249	0.13101	MEP1B	meprin A subunit beta
205680_at	0.996	0.987	MMP10	-0.016149	-6.6305	-0.0013217	MMP10	matrix metallopeptidase 10
203878_s_at	4.82e-05	3.48e-07	MMP11	7.06946	6.75226	0.660188	MMP11	matrix metallopeptidase 11
203877_at	0.283	0.104	MMP11	1.69197	-5.24853	0.155301	MMP11	matrix metallopeptidase 11
203876_s_at	0.894	0.782	MMP11	0.279947	-6.5905	0.0298673	MMP11	matrix metallopeptidase 11
204580_at	0.433	0.209	MMP12	1.29245	-5.80412	0.331785	MMP12	matrix metallopeptidase 12
205959_at	0.675	0.457	MMP13	0.757403	-6.34005	0.0874838	MMP13	matrix metallopeptidase 13
160020_at	0.213	0.0654	MMP14	1.93529	-4.85393	0.27528	MMP14	matrix metallopeptidase 14
217279_x_at	0.504	0.272	MMP14	1.12626	-5.99765	0.163261	MMP14	matrix metallopeptidase 14
202828_s_at	0.512	0.279	MMP14	1.1085	-6.01693	0.198554	MMP14	matrix metallopeptidase 14
202827_s_at	0.996	0.988	MMP14	-0.01543	-6.63051	-0.0025211	MMP14	matrix metallopeptidase 14
203365_s_at	0.554	0.322	MMP15	1.01332	-6.11558	0.166375	MMP15	matrix metallopeptidase 15
208166_at	0.132	0.0312	MMP16	2.29603	-4.20201	0.158101	MMP16	matrix metallopeptidase 16
208167_s_at	0.522	0.29	MMP16	1.08248	-6.0447	0.0984684	MMP16	matrix metallopeptidase 16
207013_s_at	0.867	0.734	MMP16	-0.34385	-6.57014	-0.030929	MMP16	matrix metallopeptidase 16
207012_at	0.967	0.922	MMP16	0.099281	-6.62558	0.0092831	MMP16	matrix metallopeptidase 16
206234_s_at	0.0618	0.0096	MMP17	2.82689	-3.12542	0.273968	MMP17	matrix metallopeptidase 17
204574_s_at	0.101	0.0204	MMP19	2.49222	-3.81853	0.282532	MMP19	matrix metallopeptidase 19
204575_s_at	0.179	0.0498	MMP19	2.07125	-4.617	0.271662	MMP19	matrix metallopeptidase 19
201069_at	0.00468	0.000224	MMP2	4.37473	0.45493	0.520337	MMP2	matrix metallopeptidase 2
207599_at	0.83	0.674	MMP20	0.426267	-6.5378	0.0381151	MMP20	matrix metallopeptidase 20
213171_s_at	0.0178	0.00151	MMP24	3.60446	-1.37793	0.405868	MMP24	matrix metallopeptidase 24
208387_s_at	0.943	0.874	MMP24	0.160801	-6.61738	0.0138759	MMP24	matrix metallopeptidase 24
207289_at	0.325	0.13	MMP25	1.56959	-5.43154	0.191378	MMP25	matrix metallopeptidase 25
207890_s_at	0.873	0.745	MMP25	-0.32958	-6.57505	-0.0372736	MMP25	matrix metallopeptidase 25
220783_at	0.273	0.0974	MMP27	1.7284	-5.19199	0.139944	MMP27	matrix metallopeptidase 27
219909_at	0.00077	1.91e-05	MMP28	-5.37178	2.85183	-0.764328	MMP28	matrix metallopeptidase 28
205828_at	0.0776	0.0135	MMP3	2.67593	-3.44363	0.254424	MMP3	matrix metallopeptidase 3
204259_at	0.00611	0.000339	MMP7	4.20829	0.05477	2.08645	MMP7	matrix metallopeptidase 7				3.4698
207329_at	0.678	0.462	MMP8	0.748536	-6.34673	0.0734335	MMP8	matrix metallopeptidase 8
203936_s_at	0.365	0.158	MMP9	1.46109	-5.58454	0.65353	MMP9	matrix metallopeptidase 9
220742_s_at	0.146	0.0364	NGLY1	-2.22314	-4.33959	-0.471296	NGLY1	N-glycanase 1
207492_at	0.633	0.407	NGLY1	0.845329	-6.26977	0.0885536	NGLY1	N-glycanase 1
221090_s_at	0.907	0.808	OGFOD1	-0.246157	-6.59959	-0.0546341	OGFOD1	2-oxoglutarate and iron dependent oxygenase domain containing 1
44617_at	0.264	0.0927	OGFOD2	1.75476	-5.15051	0.187377	OGFOD2	2-oxoglutarate and iron dependent oxygenase domain containing 2
219246_s_at	0.35	0.147	OGFOD2	1.50264	-5.527	0.195263	OGFOD2	2-oxoglutarate and iron dependent oxygenase domain containing 2
219245_s_at	0.427	0.204	OGFOD2	1.30696	-5.78612	0.196186	OGFOD2	2-oxoglutarate and iron dependent oxygenase domain containing 2
207543_s_at	0.604	0.374	P4HA1	-0.907149	-6.21604	-0.196566	P4HA1	prolyl 4-hydroxylase subunit alpha 1
222125_s_at	0.06	0.00911	P4HTM	-2.84985	-3.07629	-0.794344	P4HTM	prolyl 4-hydroxylase, transmembrane
213661_at	0.00358	0.000158	PAMR1	-4.51541	0.79387	-1.59507	PAMR1	peptidase domain containing associated with muscle regeneration 1
201982_s_at	0.239	0.0785	PAPPA	1.84211	-5.00967	0.260551	PAPPA	pappalysin 1
201981_at	0.388	0.174	PAPPA	1.40345	-5.66214	0.430498	PAPPA	pappalysin 1
213332_at	0.0558	0.00817	PAPPA2	2.89693	-2.97497	0.852569	PAPPA2	pappalysin 2
214689_at	0.346	0.144	PAPPA2	1.51244	-5.51323	0.129075	PAPPA2	pappalysin 2
211918_x_at	0.478	0.248	PAPPA2	1.18584	-5.93096	0.151019	PAPPA2	pappalysin 2
205559_s_at	0.118	0.0258	PCSK5	-2.38404	-4.03229	-0.741524	PCSK5	proprotein convertase subtilisin/kexin type 5
205560_at	0.122	0.0272	PCSK5	-2.35995	-4.07913	-0.368126	PCSK5	proprotein convertase subtilisin/kexin type 5
213652_at	0.316	0.124	PCSK5	-1.59649	-5.39225	-0.294683	PCSK5	proprotein convertase subtilisin/kexin type 5
211263_s_at	0.119	0.0264	PCSK6	2.37326	-4.05329	0.238845	PCSK6	proprotein convertase subtilisin/kexin type 6
211262_at	0.611	0.383	PCSK6	0.890337	-6.231	0.0903999	PCSK6	proprotein convertase subtilisin/kexin type 6
201860_s_at	0.00901	0.000584	PLAT	-3.98951	-0.46865	-2.24543	PLAT	plasminogen activator, tissue type
211668_s_at	0.217	0.0675	PLAU	1.91962	-4.88051	0.146322	PLAU	plasminogen activator, urokinase
205479_s_at	0.371	0.162	PLAU	1.44611	-5.60495	0.413192	PLAU	plasminogen activator, urokinase
209977_at	0.813	0.647	PLG	-0.464697	-6.52039	-0.278453	PLG	plasminogen
200827_at	0.325	0.13	PLOD1	1.56886	-5.4326	0.288217	PLOD1	procollagen-lysine,2-oxoglutarate 5-dioxygenase 1
202620_s_at	0.0538	0.0077	PLOD2	-2.92211	-2.92049	-0.695323	PLOD2	procollagen-lysine,2-oxoglutarate 5-dioxygenase 2
202619_s_at	0.573	0.341	PLOD2	0.973181	-6.15476	0.329188	PLOD2	procollagen-lysine,2-oxoglutarate 5-dioxygenase 2
202185_at	0.441	0.216	PLOD3	-1.27285	-5.82815	-0.230967	PLOD3	procollagen-lysine,2-oxoglutarate 5-dioxygenase 3
213802_at	0.954	0.896	PRSS12	0.13184	-6.62172	0.0091134	PRSS12	protease, serine 12
205515_at	0.999	0.997	PRSS12	0.003887	-6.63063	0.0003169	PRSS12	protease, serine 12
216470_x_at	0.46	0.232	PRSS2	1.22745	-5.88258	0.190592	PRSS2	protease, serine 2
205402_x_at	0.746	0.551	PRSS2	-0.605685	-6.44396	-0.0942577	PRSS2	protease, serine 2
207463_x_at	0.837	0.687	PRSS3	0.407535	-6.54575	0.0861295	PRSS3	protease, serine 3
213421_x_at	0.927	0.843	PRSS3	0.200631	-6.61	0.0404592	PRSS3	protease, serine 3
207330_at	0.338	0.139	PZP	1.53299	-5.48414	0.188689	PZP	PZP, alpha-2-macroglobulin like
220626_at	0.055	0.008	SERPINA10	2.90559	-2.95625	0.399137	SERPINA10	serpin family A member 10
209443_at	0.544	0.312	SERPINA5	1.03435	-6.09447	0.338281	SERPINA5	serpin family A member 5
206325_at	0.658	0.438	SERPINA6	-0.790256	-6.31464	-0.272863	SERPINA6	serpin family A member 6
206386_at	0.872	0.743	SERPINA7	0.331293	-6.57447	0.0262912	SERPINA7	serpin family A member 7
214539_at	0.908	0.809	SERPINB10	-0.244681	-6.59996	-0.0240693	SERPINB10	serpin family B member 10
217272_s_at	0.408	0.189	SERPINB13	1.35425	-5.7263	0.155852	SERPINB13	serpin family B member 13
211361_s_at	0.573	0.34	SERPINB13	0.973591	-6.15437	0.082891	SERPINB13	serpin family B member 13
216257_at	0.714	0.507	SERPINB13	0.674608	-6.39951	0.0931332	SERPINB13	serpin family B member 13
211362_s_at	0.85	0.706	SERPINB13	-0.381433	-6.55624	-0.0408453	SERPINB13	serpin family B member 13
215817_at	0.861	0.724	SERPINB13	0.357758	-6.56516	0.0580364	SERPINB13	serpin family B member 13
216258_s_at	0.97	0.927	SERPINB13	0.092038	-6.62629	0.0063003	SERPINB13	serpin family B member 13
204614_at	0.976	0.941	SERPINB2	-0.075044	-6.62775	-0.0052816	SERPINB2	serpin family B member 2
204855_at	0.886	0.769	SERPINB5	-0.297029	-6.58546	-0.0273687	SERPINB5	serpin family B member 5
206421_s_at	0.26	0.0903	SERPINB7	1.76846	-5.12876	0.351943	SERPINB7	serpin family B member 7
206034_at	0.819	0.657	SERPINB8	0.450474	-6.527	0.0524233	SERPINB8	serpin family B member 8
209723_at	0.307	0.118	SERPINB9	-1.6223	-5.35405	-0.567837	SERPINB9	serpin family B member 9
209722_s_at	0.963	0.913	SERPINB9	0.11026	-6.6244	0.0079701	SERPINB9	serpin family B member 9
210049_at	0.958	0.904	SERPINC1	0.122448	-6.62295	0.0292805	SERPINC1	serpin family C member 1
205576_at	0.25	0.0848	SERPIND1	-1.80161	-5.0756	-0.214461	SERPIND1	serpin family D member 1
202628_s_at	0.728	0.527	SERPINE1	-0.64316	-6.42036	-0.206214	SERPINE1	serpin family E member 1
202627_s_at	0.997	0.99	SERPINE1	0.012816	-6.63055	0.0019268	SERPINE1	serpin family E member 1
212190_at	4.82e-05	3.47e-07	SERPINE2	7.0709	6.75541	1.7635	SERPINE2	serpin family E member 2				6.45967
202283_at	0.00526	0.000272	SERPINF1	4.29799	0.27026	1.43702	SERPINF1	serpin family F member 1				3.56543
205075_at	0.973	0.934	SERPINF2	-0.083126	-6.62709	-0.0201222	SERPINF2	serpin family F member 2
200986_at	0.555	0.323	SERPING1	-1.01004	-6.11884	-0.305793	SERPING1	serpin family G member 1
207714_s_at	0.000883	2.37e-05	SERPINH1	5.28246	2.63868	0.711045	SERPINH1	serpin family H member 1
205352_at	0.173	0.0471	SERPINI1	-2.09887	-4.56752	-0.655397	SERPINI1	serpin family I member 1
207636_at	0.0216	0.00202	SERPINI2	-3.48412	-1.65759	-0.388975	SERPINI2	serpin family I member 2
203021_at	0.508	0.275	SLPI	1.11866	-6.00593	0.402118	SLPI	secretory leukocyte peptidase inhibitor
210536_s_at	0.448	0.222	SPAM1	1.25653	-5.84792	0.163831	SPAM1	sperm adhesion molecule 1
216989_at	0.846	0.699	SPAM1	-0.39101	-6.55247	-0.0316503	SPAM1	sperm adhesion molecule 1
216972_at	0.848	0.703	SPAM1	0.385859	-6.55451	0.025971	SPAM1	sperm adhesion molecule 1
202005_at	0.000225	3.48e-06	ST14	6.07688	4.51109	1.03609	ST14	suppression of tumorigenicity 14				5.45842
216905_s_at	0.00844	0.000528	ST14	4.03013	-0.37175	0.970056	ST14	suppression of tumorigenicity 14
216906_at	0.106	0.0221	ST14	2.45576	-3.89119	0.196715	ST14	suppression of tumorigenicity 14
212344_at	2.21e-07	3.97e-11	SULF1	-11.7052	15.3994	-2.07475	SULF1	sulfatase 1
212353_at	0.000119	1.43e-06	SULF1	-6.45295	5.37481	-2.16104	SULF1	sulfatase 1
212354_at	0.00158	5.02e-05	SULF1	-4.97791	1.90843	-1.65469	SULF1	sulfatase 1
206008_at	0.282	0.103	TGM1	1.69651	-5.24153	0.171739	TGM1	transglutaminase 1
201042_at	0.102	0.0209	TGM2	2.48159	-3.83978	0.556577	TGM2	transglutaminase 2
211573_x_at	0.198	0.0585	TGM2	1.9913	-4.75768	0.227034	TGM2	transglutaminase 2
216183_at	0.405	0.187	TGM2	1.36103	-5.71757	0.168657	TGM2	transglutaminase 2
211003_x_at	0.511	0.278	TGM2	1.11153	-6.01367	0.119812	TGM2	transglutaminase 2
206004_at	0.736	0.538	TGM3	0.62486	-6.43206	0.0782839	TGM3	transglutaminase 3
217566_s_at	0.0201	0.00181	TGM4	3.52805	-1.5558	0.279024	TGM4	transglutaminase 4
206260_at	0.604	0.374	TGM4	-0.907305	-6.2159	-0.0936861	TGM4	transglutaminase 4
217567_at	0.93	0.851	TGM4	0.190484	-6.61204	0.0187052	TGM4	transglutaminase 4
207911_s_at	0.599	0.368	TGM5	0.917545	-6.20666	0.118244	TGM5	transglutaminase 5
201666_at	0.264	0.0926	TIMP1	-1.75515	-5.14988	-0.596464	TIMP1	TIMP metallopeptidase inhibitor 1
203167_at	0.00349	0.000153	TIMP2	-4.52898	0.82659	-0.719609	TIMP2	TIMP metallopeptidase inhibitor 2
201150_s_at	0.0033	0.000141	TIMP3	-4.56264	0.90776	-1.42798	TIMP3	TIMP metallopeptidase inhibitor 3
201148_s_at	0.00475	0.00023	TIMP3	-4.36538	0.43242	-0.625142	TIMP3	TIMP metallopeptidase inhibitor 3
201147_s_at	0.0128	0.000951	TIMP3	-3.79201	-0.93741	-1.01237	TIMP3	TIMP metallopeptidase inhibitor 3
201149_s_at	0.187	0.0533	TIMP3	-2.0376	-4.67667	-0.432939	TIMP3	TIMP metallopeptidase inhibitor 3
206243_at	0.499	0.267	TIMP4	1.13824	-5.98449	0.121214	TIMP4	TIMP metallopeptidase inhibitor 4
206415_at	0.663	0.442	TLL1	0.78269	-6.32059	0.0806662	TLL1	tolloid like 1
215008_at	0.598	0.368	TLL2	0.91804	-6.20621	0.0655491	TLL2	tolloid like 2
208027_s_at	0.755	0.562	TLL2	0.588544	-6.4543	0.0399853	TLL2	tolloid like 2
215843_s_at	0.943	0.874	TLL2	0.160901	-6.61736	0.0285729	TLL2	tolloid like 2
217269_s_at	0.594	0.363	TMPRSS15	0.927429	-6.19764	0.115755	TMPRSS15	transmembrane protease, serine 15
207638_at	0.745	0.549	TMPRSS15	0.60804	-6.44252	0.0414214	TMPRSS15	transmembrane protease, serine 15
205609_at	0.0565	0.00833	ANGPT1	2.88852	-2.99314	0.555782	ANGPT1	angiopoietin 1
205608_s_at	0.533	0.301	ANGPT1	1.05933	-6.0689	0.268071	ANGPT1	angiopoietin 1
211148_s_at	0.283	0.104	ANGPT2	1.69139	-5.24941	0.170785	ANGPT2	angiopoietin 2
205572_at	0.296	0.112	ANGPT2	1.65205	-5.30941	0.146738	ANGPT2	angiopoietin 2
221134_at	0.117	0.0255	ANGPT4	2.39047	-4.01974	0.229455	ANGPT4	angiopoietin 4
213004_at	0.0298	0.00326	ANGPTL2	3.28527	-2.11345	0.443506	ANGPTL2	angiopoietin like 2
213001_at	0.0692	0.0114	ANGPTL2	2.75266	-3.28296	0.502886	ANGPTL2	angiopoietin like 2
219514_at	0.761	0.571	ANGPTL2	0.574707	-6.46243	0.0713263	ANGPTL2	angiopoietin like 2
219803_at	0.836	0.685	ANGPTL3	-0.411205	-6.54422	-0.176849	ANGPTL3	angiopoietin like 3
221009_s_at	0.868	0.737	ANGPTL4	-0.340557	-6.57129	-0.13828	ANGPTL4	angiopoietin like 4
206423_at	0.0512	0.00712	ANGPTL7	2.95581	-2.84721	0.486269	ANGPTL7	angiopoietin like 7
205239_at	0.653	0.431	AREG	-0.801609	-6.30563	-0.366931	AREG	amphiregulin
215564_at	0.703	0.492	AREG	0.698804	-6.38281	0.0475117	AREG	amphiregulin
216052_x_at	0.149	0.0376	ARTN	2.20779	-4.36821	0.156432	ARTN	artemin
207675_x_at	0.206	0.0624	ARTN	1.95909	-4.81326	0.226677	ARTN	artemin
210237_at	0.823	0.663	ARTN	0.441367	-6.53113	0.065019	ARTN	artemin
206382_s_at	0.884	0.765	BDNF	0.302624	-6.58375	0.0445462	BDNF	brain derived neurotrophic factor
208292_at	0.446	0.22	BMP10	1.26038	-5.84327	0.152525	BMP10	bone morphogenetic protein 10
221332_at	0.928	0.845	BMP15	0.197265	-6.61069	0.025481	BMP15	bone morphogenetic protein 15
205289_at	0.00146	4.52e-05	BMP2	-5.02067	2.01122	-1.82795	BMP2	bone morphogenetic protein 2
205290_s_at	0.00165	5.34e-05	BMP2	-4.95324	1.84908	-1.66614	BMP2	bone morphogenetic protein 2
208244_at	0.93	0.849	BMP3	-0.192063	-6.61173	-0.0286021	BMP3	bone morphogenetic protein 3
211518_s_at	0.913	0.819	BMP4	0.231116	-6.60327	0.0470567	BMP4	bone morphogenetic protein 4
205430_at	0.00649	0.000367	BMP5	4.17704	-0.02018	0.349455	BMP5	bone morphogenetic protein 5
205431_s_at	0.427	0.204	BMP5	1.30889	-5.78372	0.261304	BMP5	bone morphogenetic protein 5
206176_at	0.811	0.644	BMP6	-0.468409	-6.51863	-0.0685694	BMP6	bone morphogenetic protein 6
215042_at	0.811	0.645	BMP6	0.467312	-6.51915	0.0544341	BMP6	bone morphogenetic protein 6
209590_at	1.76e-06	2.34e-09	BMP7	-9.45209	11.57	-2.08772	BMP7	bone morphogenetic protein 7
209591_s_at	1.78e-05	8.34e-08	BMP7	-7.71468	8.13788	-1.81175	BMP7	bone morphogenetic protein 7
211260_at	0.979	0.948	BMP7	0.066542	-6.62836	0.0096721	BMP7	bone morphogenetic protein 7
211259_s_at	0.996	0.988	BMP7	0.015787	-6.63051	0.0023957	BMP7	bone morphogenetic protein 7
220204_s_at	0.571	0.339	BMP8A	0.976348	-6.15172	0.176798	BMP8A	bone morphogenetic protein 8a
207866_at	0.835	0.683	BMP8A	0.413284	-6.54335	0.0317641	BMP8A	bone morphogenetic protein 8a
220203_at	0.898	0.79	BMP8A	0.268979	-6.59358	0.0278899	BMP8A	bone morphogenetic protein 8a
221615_at	0.667	0.448	BMP8B	-0.772791	-6.32828	-0.0999997	BMP8B	bone morphogenetic protein 8b
207865_s_at	0.772	0.586	BMP8B	-0.551852	-6.47546	-0.0598425	BMP8B	bone morphogenetic protein 8b
214822_at	0.621	0.394	BRINP2	0.868177	-6.25033	0.0748281	BRINP2	BMP/retinoic acid inducible neural specific 2
217562_at	0.429	0.206	BRINP3	1.30223	-5.79201	0.114119	BRINP3	BMP/retinoic acid inducible neural specific 3
207326_at	0.979	0.947	BTC	-0.066816	-6.62834	-0.0065259	BTC	betacellulin
205747_at	0.873	0.745	CBLN1	0.329453	-6.57509	0.037214	CBLN1	cerebellin 1 precursor
207533_at	0.176	0.0486	CCL1	2.08297	-4.59606	0.17298	CCL1	C-C motif chemokine ligand 1
210133_at	0.308	0.119	CCL11	1.62108	-5.35586	0.252609	CCL11	C-C motif chemokine ligand 11
207900_at	0.575	0.343	CCL17	0.969179	-6.15859	0.119236	CCL17	C-C motif chemokine ligand 17
210072_at	0.0116	0.000834	CCL19	3.84532	-0.81131	1.93127	CCL19	C-C motif chemokine ligand 19				3.07883
216598_s_at	0.168	0.045	CCL2	2.12084	-4.52786	0.788849	CCL2	C-C motif chemokine ligand 2
205476_at	0.945	0.879	CCL20	0.153941	-6.61848	0.0563587	CCL20	C-C motif chemokine ligand 20
207861_at	0.176	0.0486	CCL22	2.08342	-4.59526	0.40862	CCL22	C-C motif chemokine ligand 22
221463_at	0.0421	0.00538	CCL24	3.07547	-2.58426	0.2448	CCL24	C-C motif chemokine ligand 24
206988_at	0.762	0.572	CCL25	0.573045	-6.4634	0.0795869	CCL25	C-C motif chemokine ligand 25
204103_at	0.536	0.304	CCL4	1.05198	-6.07648	0.3196	CCL4	C-C motif chemokine ligand 4
204655_at	0.00937	0.000615	CCL5	3.96859	-0.5185	1.72049	CCL5	C-C motif chemokine ligand 5				3.21112
1405_i_at	0.0134	0.00101	CCL5	3.76593	-0.99898	1.49445	CCL5	C-C motif chemokine ligand 5				2.99568
208075_s_at	0.914	0.82	CCL7	-0.229856	-6.60356	-0.0202084	CCL7	C-C motif chemokine ligand 7
214038_at	0.104	0.0214	CCL8	2.47066	-3.86158	0.71579	CCL8	C-C motif chemokine ligand 8
221674_s_at	0.407	0.188	CHRD	1.35584	-5.72426	0.137989	CHRD	chordin
211248_s_at	0.755	0.563	CHRD	0.587558	-6.45488	0.0743624	CHRD	chordin
209763_at	0.424	0.201	CHRDL1	-1.31537	-5.77562	-0.374116	CHRDL1	chordin like 1
219500_at	0.7	0.488	CLCF1	0.705358	-6.37819	0.0687181	CLCF1	cardiotrophin-like cytokine factor 1
208597_at	0.415	0.195	CNTF	1.3365	-5.74896	0.13612	CNTF	ciliary neurotrophic factor
205984_at	0.00587	0.000318	CRHBP	-4.23468	0.11814	-1.73916	CRHBP	corticotropin releasing hormone binding protein
206315_at	0.109	0.0231	CRLF1	2.43597	-3.93037	0.283454	CRLF1	cytokine receptor like factor 1
205474_at	0.823	0.663	CRLF3	-0.440923	-6.53133	-0.0959569	CRLF3	cytokine receptor like factor 3
220090_at	0.966	0.92	CRNN	0.101361	-6.62536	0.0115614	CRNN	cornulin
211839_s_at	0.0208	0.00191	CSF1	3.50646	-1.60587	0.38951	CSF1	colony stimulating factor 1
209716_at	0.516	0.283	CSF1	-1.09929	-6.02684	-0.162714	CSF1	colony stimulating factor 1
210557_x_at	0.642	0.418	CSF1	0.825462	-6.28629	0.0985836	CSF1	colony stimulating factor 1
207082_at	0.908	0.81	CSF1	0.243534	-6.60025	0.0268119	CSF1	colony stimulating factor 1
210229_s_at	0.511	0.278	CSF2	1.11125	-6.01397	0.0961098	CSF2	colony stimulating factor 2
210228_at	0.968	0.924	CSF2	-0.096105	-6.6259	-0.0139147	CSF2	colony stimulating factor 2
207442_at	0.473	0.244	CSF3	1.19653	-5.91868	0.144987	CSF3	colony stimulating factor 3
206813_at	0.443	0.217	CTF1	-1.26918	-5.83261	-0.215167	CTF1	cardiotrophin 1
823_at	0.187	0.0533	CX3CL1	-2.03822	-4.67557	-0.680788	CX3CL1	C-X3-C motif chemokine ligand 1
203687_at	0.267	0.0941	CX3CL1	-1.74669	-5.16326	-0.445828	CX3CL1	C-X3-C motif chemokine ligand 1
204470_at	0.297	0.113	CXCL1	1.64907	-5.3139	0.58243	CXCL1	C-X-C motif chemokine ligand 1
204533_at	0.972	0.932	CXCL10	-0.086605	-6.62679	-0.0362507	CXCL10	C-X-C motif chemokine ligand 10
211122_s_at	0.716	0.51	CXCL11	0.669271	-6.40312	0.069536	CXCL11	C-X-C motif chemokine ligand 11
210163_at	0.926	0.842	CXCL11	0.201127	-6.6099	0.0346107	CXCL11	C-X-C motif chemokine ligand 11
209687_at	0.334	0.136	CXCL12	1.54667	-5.4646	0.676374	CXCL12	C-X-C motif chemokine ligand 12
203666_at	0.823	0.664	CXCL12	0.440159	-6.53167	0.109201	CXCL12	C-X-C motif chemokine ligand 12
205242_at	0.302	0.115	CXCL13	1.6379	-5.33072	1.0975	CXCL13	C-X-C motif chemokine ligand 13				0.939302
218002_s_at	0.904	0.8	CXCL14	0.256607	-6.5969	0.0662929	CXCL14	C-X-C motif chemokine ligand 14
209774_x_at	0.61	0.381	CXCL2	-0.894101	-6.22767	-0.408557	CXCL2	C-X-C motif chemokine ligand 2
207850_at	0.108	0.0226	CXCL3	2.44624	-3.91006	0.345411	CXCL3	C-X-C motif chemokine ligand 3
214974_x_at	0.353	0.149	CXCL5	1.49441	-5.5385	0.72552	CXCL5	C-X-C motif chemokine ligand 5
215101_s_at	0.359	0.153	CXCL5	1.47821	-5.56099	0.0880955	CXCL5	C-X-C motif chemokine ligand 5
207852_at	0.756	0.564	CXCL5	0.584883	-6.45647	0.0409207	CXCL5	C-X-C motif chemokine ligand 5
203915_at	0.562	0.33	CXCL9	0.99555	-6.1331	0.741701	CXCL9	C-X-C motif chemokine ligand 9
219424_at	0.00676	0.000386	EBI3	4.15627	-0.06999	0.425438	EBI3	Epstein-Barr virus induced 3
206217_at	0.373	0.163	EDA	-1.44135	-5.61141	-0.255101	EDA	ectodysplasin A
211129_x_at	0.786	0.607	EDA	-0.520987	-6.49223	-0.03896	EDA	ectodysplasin A
211128_at	0.819	0.657	EDA	0.450259	-6.5271	0.0470134	EDA	ectodysplasin A
211127_x_at	0.841	0.693	EDA	0.399481	-6.54906	0.0311628	EDA	ectodysplasin A
211130_x_at	0.857	0.717	EDA	0.366558	-6.56191	0.043322	EDA	ectodysplasin A
211131_s_at	0.932	0.854	EDA	0.186334	-6.61284	0.0132426	EDA	ectodysplasin A
206254_at	0.0339	0.00392	EGF	-3.2085	-2.28707	-1.28184	EGF	epidermal growth factor
219454_at	0.123	0.0278	EGFL6	-2.3499	-4.0986	-0.504507	EGFL6	EGF like domain multiple 6
218825_at	0.551	0.319	EGFL7	-1.01948	-6.10944	-0.259929	EGFL7	EGF like domain multiple 7
207257_at	0.168	0.0454	EPO	2.11664	-4.53545	0.176632	EPO	erythropoietin
217254_s_at	0.633	0.407	EPO	-0.844399	-6.27056	-0.118934	EPO	erythropoietin
205767_at	0.518	0.286	EREG	1.09244	-6.03415	0.0744463	EREG	epiregulin
208240_s_at	0.000506	1.09e-05	FGF1	-5.60216	3.3989	-1.86973	FGF1	fibroblast growth factor 1
205117_at	0.00385	0.000174	FGF1	-4.47716	0.70167	-2.51784	FGF1	fibroblast growth factor 1
207501_s_at	0.298	0.113	FGF12	1.6477	-5.31598	0.133733	FGF12	fibroblast growth factor 12
214589_at	0.825	0.666	FGF12	0.437717	-6.53276	0.0476362	FGF12	fibroblast growth factor 12
205110_s_at	0.674	0.456	FGF13	-0.758442	-6.33926	-0.274739	FGF13	fibroblast growth factor 13
221310_at	0.814	0.648	FGF14	0.462019	-6.52165	0.0370808	FGF14	fibroblast growth factor 14
221374_at	0.334	0.137	FGF16	1.5431	-5.46971	0.180391	FGF16	fibroblast growth factor 16
221376_at	0.981	0.953	FGF17	-0.060032	-6.62879	-0.0061643	FGF17	fibroblast growth factor 17
206986_at	0.0351	0.00411	FGF18	3.18844	-2.33217	0.44978	FGF18	fibroblast growth factor 18
211485_s_at	0.737	0.539	FGF18	0.624015	-6.43259	0.0638469	FGF18	fibroblast growth factor 18
211029_x_at	0.851	0.707	FGF18	0.380506	-6.5566	0.0486915	FGF18	fibroblast growth factor 18
206987_x_at	0.94	0.868	FGF18	0.167608	-6.61623	0.0173542	FGF18	fibroblast growth factor 18
214284_s_at	0.966	0.919	FGF18	0.102407	-6.62526	0.0147835	FGF18	fibroblast growth factor 18
204421_s_at	0.331	0.134	FGF2	1.55482	-5.45289	0.235241	FGF2	fibroblast growth factor 2
204422_s_at	0.688	0.474	FGF2	0.728838	-6.3613	0.0825229	FGF2	fibroblast growth factor 2
220394_at	0.122	0.0272	FGF20	2.3599	-4.07923	0.151851	FGF20	fibroblast growth factor 20
221433_at	0.529	0.297	FGF21	1.06717	-6.06075	0.131153	FGF21	fibroblast growth factor 21
221315_s_at	0.231	0.0747	FGF22	1.86796	-4.96703	0.167638	FGF22	fibroblast growth factor 22
221166_at	0.492	0.261	FGF23	1.15331	-5.96775	0.133829	FGF23	fibroblast growth factor 23
214571_at	0.0813	0.0146	FGF3	2.64159	-3.51478	0.213063	FGF3	fibroblast growth factor 3
206783_at	0.776	0.594	FGF4	-0.541081	-6.48142	-0.0503479	FGF4	fibroblast growth factor 4
210311_at	0.12	0.0265	FGF5	2.37265	-4.05447	0.217253	FGF5	fibroblast growth factor 5
210310_s_at	0.289	0.108	FGF5	1.67461	-5.27514	0.165393	FGF5	fibroblast growth factor 5
208378_x_at	0.993	0.981	FGF5	0.02383	-6.63034	0.0022824	FGF5	fibroblast growth factor 5
208417_at	0.158	0.0411	FGF6	2.16441	-4.44839	0.210404	FGF6	fibroblast growth factor 6
205782_at	0.0704	0.0117	FGF7	2.73976	-3.31014	0.399792	FGF7	fibroblast growth factor 7
208449_s_at	0.432	0.208	FGF8	1.29588	-5.79988	0.0867443	FGF8	fibroblast growth factor 8
206404_at	5.99e-05	5e-07	FGF9	-6.90986	6.40051	-1.62818	FGF9	fibroblast growth factor 9
205014_at	0.27	0.0958	FGFBP1	1.73748	-5.17775	0.190088	FGFBP1	fibroblast growth factor binding protein 1
215704_at	0.0787	0.0139	FLG	-2.66574	-3.46478	-0.415329	FLG	filaggrin
203697_at	0.48	0.25	FRZB	1.18141	-5.93602	0.285228	FRZB	frizzled-related protein
203698_s_at	0.71	0.501	FRZB	0.683914	-6.39315	0.144542	FRZB	frizzled-related protein
204948_s_at	0.00465	0.000222	FST	4.37923	0.46575	0.510484	FST	follistatin
207345_at	0.606	0.376	FST	0.902863	-6.21988	0.0739656	FST	follistatin
208782_at	0.000286	4.88e-06	FSTL1	-5.93531	4.1818	-0.862383	FSTL1	follistatin like 1
203592_s_at	0.48	0.25	FSTL3	1.17959	-5.9381	0.196029	FSTL3	follistatin like 3
206159_at	0.15	0.0378	GDF10	2.20477	-4.37382	0.170727	GDF10	growth differentiation factor 10
216860_s_at	0.614	0.386	GDF11	0.8841	-6.23649	0.0685905	GDF11	growth differentiation factor 11
216854_at	0.702	0.49	GDF11	0.701386	-6.381	0.0763292	GDF11	growth differentiation factor 11
217498_at	0.866	0.733	GDF11	0.34514	-6.56969	0.0355418	GDF11	growth differentiation factor 11
221576_at	0.428	0.204	GDF15	-1.30669	-5.78646	-0.554792	GDF15	growth differentiation factor 15
221577_x_at	0.802	0.629	GDF15	0.489768	-6.50823	0.260689	GDF15	growth differentiation factor 15
221136_at	0.848	0.702	GDF2	0.386781	-6.55415	0.0438199	GDF2	growth differentiation factor 2
220053_at	0.574	0.342	GDF3	0.971295	-6.15657	0.0720265	GDF3	growth differentiation factor 3
206614_at	0.393	0.177	GDF5	1.39192	-5.67734	0.178995	GDF5	growth differentiation factor 5
214238_at	0.73	0.529	GDF7	0.63872	-6.42323	0.144469	GDF7	growth differentiation factor 7
221314_at	0.895	0.786	GDF9	0.275281	-6.59183	0.0403126	GDF9	growth differentiation factor 9
221359_at	0.61	0.382	GDNF	0.892235	-6.22933	0.0651792	GDNF	glial cell derived neurotrophic factor
203821_at	0.0144	0.00111	HBEGF	-3.7291	-1.08573	-1.35701	HBEGF	heparin binding EGF like growth factor
38037_at	0.0163	0.00133	HBEGF	-3.65435	-1.26125	-1.32333	HBEGF	heparin binding EGF like growth factor
222076_at	0.886	0.768	HBEGF	-0.298419	-6.58504	-0.0259649	HBEGF	heparin binding EGF like growth factor
202474_s_at	0.164	0.0435	HCFC1	2.13788	-4.49689	0.273482	HCFC1	host cell factor C1
202473_x_at	0.521	0.289	HCFC1	1.08496	-6.04208	0.100971	HCFC1	host cell factor C1
219484_at	0.822	0.662	HCFC2	-0.442386	-6.53067	-0.056617	HCFC2	host cell factor C2
209960_at	0.00773	0.000469	HGF	4.07778	-0.2579	1.60407	HGF	hepatocyte growth factor				3.32883
210997_at	0.0604	0.00926	HGF	2.84262	-3.09177	0.418465	HGF	hepatocyte growth factor
210755_at	0.0959	0.0189	HGF	2.52641	-3.74987	0.217331	HGF	hepatocyte growth factor
209961_s_at	0.124	0.028	HGF	2.34606	-4.10602	0.286622	HGF	hepatocyte growth factor
210998_s_at	0.485	0.255	HGF	1.16864	-5.95053	0.167703	HGF	hepatocyte growth factor
207027_at	0.44	0.215	HGFAC	1.2763	-5.82394	0.117078	HGFAC	HGF activator
208375_at	0.86	0.722	IFNA1	-0.360084	-6.56431	-0.0240228	IFNA1	interferon alpha 1
208182_x_at	0.273	0.0976	IFNA14	1.72724	-5.19379	0.16197	IFNA14	interferon alpha 14
208448_x_at	0.154	0.0394	IFNA16	2.18471	-4.41099	0.161254	IFNA16	interferon alpha 16
211338_at	0.756	0.564	IFNA2	0.585842	-6.4559	0.0447719	IFNA2	interferon alpha 2
207964_x_at	0.605	0.375	IFNA4	0.904477	-6.21843	0.0891427	IFNA4	interferon alpha 4
214569_at	0.755	0.563	IFNA5	0.587514	-6.45491	0.0416359	IFNA5	interferon alpha 5
208259_x_at	0.363	0.156	IFNA7	1.46587	-5.57798	0.134101	IFNA7	interferon alpha 7
208173_at	0.7	0.488	IFNB1	0.705118	-6.37836	0.0653996	IFNB1	interferon beta 1
210354_at	0.689	0.474	IFNG	0.727209	-6.36249	0.0486433	IFNG	interferon gamma
209541_at	0.00205	7.11e-05	IGF1	-4.83747	1.57035	-2.57456	IGF1	insulin like growth factor 1
209540_at	0.00361	0.00016	IGF1	-4.51132	0.78401	-2.32691	IGF1	insulin like growth factor 1
211577_s_at	0.249	0.0839	IGF1	-1.80734	-5.06634	-0.559084	IGF1	insulin like growth factor 1
209542_x_at	0.27	0.0958	IGF1	-1.73707	-5.17839	-0.572804	IGF1	insulin like growth factor 1
215420_at	0.164	0.0435	IHH	2.13767	-4.49728	0.231646	IHH	indian hedgehog
207433_at	0.156	0.0402	IL10	2.17567	-4.42768	0.20097	IL10	interleukin 10
206926_s_at	0.799	0.625	IL11	-0.495915	-6.50516	-0.0827737	IL11	interleukin 11
206924_at	0.961	0.91	IL11	0.114799	-6.62388	0.0117378	IL11	interleukin 11
207160_at	0.766	0.578	IL12A	0.563639	-6.46881	0.031883	IL12A	interleukin 12A
207901_at	0.582	0.35	IL12B	0.95394	-6.17303	0.0644252	IL12B	interleukin 12B
207844_at	0.51	0.278	IL13	1.11225	-6.01289	0.132073	IL13	interleukin 13
217371_s_at	0.253	0.0861	IL15	1.79392	-5.088	0.273508	IL15	interleukin 15
205992_s_at	0.503	0.271	IL15	-1.12916	-5.99447	-0.241858	IL15	interleukin 15
209827_s_at	0.0372	0.00448	IL16	3.15253	-2.41268	0.565445	IL16	interleukin 16
209828_s_at	0.065	0.0103	IL16	2.79451	-3.19438	0.779253	IL16	interleukin 16
208402_at	0.706	0.496	IL17A	-0.6924	-6.38729	-0.0607548	IL17A	interleukin 17A
216876_s_at	0.884	0.765	IL17A	0.301911	-6.58397	0.0243875	IL17A	interleukin 17A
220273_at	0.555	0.323	IL17B	1.0109	-6.11799	0.0882096	IL17B	interleukin 17B
206295_at	0.0292	0.00318	IL18	3.29558	-2.09003	0.461957	IL18	interleukin 18
220745_at	0.783	0.603	IL19	0.527678	-6.48867	0.0546881	IL19	interleukin 19
208200_at	0.57	0.338	IL1A	0.97829	-6.14986	0.112738	IL1A	interleukin 1 alpha
210118_s_at	0.791	0.613	IL1A	0.512115	-6.49688	0.0388759	IL1A	interleukin 1 alpha
39402_at	0.645	0.422	IL1B	0.818294	-6.29216	0.183015	IL1B	interleukin 1 beta
205067_at	0.826	0.668	IL1B	0.434908	-6.53401	0.0952251	IL1B	interleukin 1 beta
212657_s_at	0.279	0.102	IL1RN	1.70425	-5.22957	0.380836	IL1RN	interleukin 1 receptor antagonist
216243_s_at	0.592	0.361	IL1RN	0.932822	-6.19269	0.0982473	IL1RN	interleukin 1 receptor antagonist
216244_at	0.746	0.55	IL1RN	-0.606079	-6.44372	-0.0479993	IL1RN	interleukin 1 receptor antagonist
216245_at	0.833	0.679	IL1RN	0.418559	-6.54111	0.0355811	IL1RN	interleukin 1 receptor antagonist
212659_s_at	0.84	0.692	IL1RN	0.401417	-6.54827	0.0715107	IL1RN	interleukin 1 receptor antagonist
207849_at	0.133	0.0316	IL2	2.29064	-4.2123	0.148424	IL2	interleukin 2
217181_at	0.685	0.47	IL2	-0.734388	-6.35724	-0.0640971	IL2	interleukin 2
221165_s_at	0.598	0.368	IL22	0.918144	-6.20611	0.104919	IL22	interleukin 22
216857_at	0.342	0.141	IL23A	1.52336	-5.49782	0.133781	IL23A	interleukin 23 subunit alpha
220054_at	0.473	0.243	IL23A	1.19771	-5.91731	0.124228	IL23A	interleukin 23 subunit alpha
206569_at	0.584	0.352	IL24	0.950654	-6.17611	0.0938128	IL24	interleukin 24
220971_at	0.243	0.0809	IL25	1.82646	-5.03527	0.23223	IL25	interleukin 25
207906_at	0.873	0.745	IL3	-0.329202	-6.57517	-0.0334784	IL3	interleukin 3
207538_at	0.669	0.45	IL4	-0.769089	-6.33113	-0.0634696	IL4	interleukin 4
207539_s_at	0.96	0.909	IL4	-0.115947	-6.62374	-0.0088122	IL4	interleukin 4
207952_at	0.665	0.445	IL5	0.777809	-6.32439	0.0677638	IL5	interleukin 5
205207_at	0.816	0.652	IL6	-0.457452	-6.52378	-0.0924734	IL6	interleukin 6
206693_at	0.0868	0.0161	IL7	2.59844	-3.60352	0.51195	IL7	interleukin 7
208193_at	0.293	0.11	IL9	-1.66267	-5.29332	-0.108114	IL9	interleukin 9
210141_s_at	0.999	0.995	INHA	-0.006762	-6.63061	-0.0007234	INHA	inhibin alpha subunit
204926_at	0.456	0.228	INHBA	1.23796	-5.87014	0.0796462	INHBA	inhibin beta A subunit
210511_s_at	0.714	0.508	INHBA	0.67312	-6.40052	0.205599	INHBA	inhibin beta A subunit
205258_at	0.483	0.253	INHBB	1.17396	-5.9445	0.174406	INHBB	inhibin beta B subunit
207688_s_at	0.0239	0.00235	INHBC	3.42081	-1.80365	0.747956	INHBC	inhibin beta C subunit
207687_at	0.607	0.377	INHBC	0.900878	-6.22165	0.10938	INHBC	inhibin beta C subunit
210587_at	0.198	0.0584	INHBE	1.9927	-4.75524	0.14322	INHBE	inhibin beta E subunit
214400_at	0.0273	0.00285	INSL3	3.34241	-1.98333	0.350816	INSL3	insulin like 3
214572_s_at	0.197	0.0582	INSL3	1.99395	-4.75307	0.22621	INSL3	insulin like 3
221091_at	0.526	0.294	INSL5	1.07427	-6.05333	0.079541	INSL5	insulin like 5
221403_s_at	0.594	0.364	INSL6	0.92597	-6.19898	0.0930996	INSL6	insulin like 6
206268_at	0.965	0.917	LEFTY1	-0.105486	-6.62493	-0.046187	LEFTY1	left-right determination factor 1
207092_at	0.815	0.651	LEP	0.459049	-6.52304	0.0473456	LEP	leptin
205266_at	0.89	0.775	LIF	-0.289418	-6.58774	-0.0563425	LIF	leukemia inhibitory factor
206975_at	0.931	0.852	LTA	0.188217	-6.61248	0.0215795	LTA	lymphotoxin alpha
207339_s_at	0.0193	0.00171	LTB	3.55161	-1.50106	1.70846	LTB	lymphotoxin beta				2.767
209035_at	0.00306	0.000124	MDK	4.6129	1.02894	0.563862	MDK	midkine (neurite growth-promoting factor 2)
213942_at	0.728	0.526	MEGF6	0.643269	-6.42029	0.0723391	MEGF6	multiple EGF like domains 6
214778_at	0.664	0.444	MEGF8	0.779639	-6.32297	0.0885548	MEGF8	multiple EGF like domains 8
212830_at	0.000361	6.85e-06	MEGF9	-5.7936	3.85009	-1.50596	MEGF9	multiple EGF like domains 9
212831_at	0.684	0.469	MEGF9	-0.735782	-6.35621	-0.107318	MEGF9	multiple EGF like domains 9
205614_x_at	0.93	0.849	MST1	0.192003	-6.61174	0.0339809	MST1	macrophage stimulating 1
216320_x_at	0.998	0.993	MST1	-0.008866	-6.63059	-0.0017734	MST1	macrophage stimulating 1
207145_at	0.873	0.745	MSTN	0.32963	-6.57503	0.0231596	MSTN	myostatin
206814_at	0.153	0.0391	NGF	-2.1886	-4.4038	-0.371842	NGF	nerve growth factor
220689_at	0.346	0.144	NODAL	1.51387	-5.51123	0.239778	NODAL	nodal growth differentiation factor
208241_at	0.168	0.0453	NRG1	2.11822	-4.5326	0.250655	NRG1	neuregulin 1
208232_x_at	0.2	0.0597	NRG1	1.98128	-4.77503	0.299577	NRG1	neuregulin 1
206343_s_at	0.836	0.684	NRG1	0.412393	-6.54372	0.0954214	NRG1	neuregulin 1
206237_s_at	0.906	0.804	NRG1	-0.250731	-6.59843	-0.0307667	NRG1	neuregulin 1
208231_at	0.914	0.82	NRG1	0.230369	-6.60344	0.0185078	NRG1	neuregulin 1
208230_s_at	0.977	0.942	NRG1	0.07359	-6.62786	0.0089527	NRG1	neuregulin 1
206879_s_at	0.306	0.117	NRG2	1.62764	-5.34607	0.159701	NRG2	neuregulin 2
208062_s_at	0.981	0.954	NRG2	0.058045	-6.62891	0.0071091	NRG2	neuregulin 2
210683_at	0.133	0.0315	NRTN	2.29126	-4.21112	0.447748	NRTN	neurturin
206706_at	0.0171	0.00143	NTF3	3.6265	-1.32643	0.343056	NTF3	neurotrophin 3
214637_at	0.00526	0.000272	OSM	4.29781	0.26985	0.42091	OSM	oncostatin M
205463_s_at	0.24	0.0789	PDGFA	-1.83912	-5.01458	-0.399011	PDGFA	platelet derived growth factor subunit A
216867_s_at	0.308	0.119	PDGFA	-1.61814	-5.36023	-0.31424	PDGFA	platelet derived growth factor subunit A
216055_at	0.0561	0.00826	PDGFB	2.89216	-2.98528	0.361729	PDGFB	platelet derived growth factor subunit B
204200_s_at	0.334	0.137	PDGFB	-1.54304	-5.4698	-0.195398	PDGFB	platelet derived growth factor subunit B
217112_at	0.646	0.423	PDGFB	0.816489	-6.29363	0.0845532	PDGFB	platelet derived growth factor subunit B
216061_x_at	0.906	0.804	PDGFB	-0.251032	-6.59835	-0.0443476	PDGFB	platelet derived growth factor subunit B
218718_at	0.98	0.949	PDGFC	0.064766	-6.62848	0.0090472	PDGFC	platelet derived growth factor C
219304_s_at	0.0893	0.0168	PDGFD	-2.57913	-3.64297	-0.984401	PDGFD	platelet derived growth factor D
206390_x_at	0.538	0.306	PF4	-1.04811	-6.08045	-0.25108	PF4	platelet factor 4
209652_s_at	0.47	0.241	PGF	1.2039	-5.91014	0.131633	PGF	placental growth factor
215179_x_at	0.584	0.352	PGF	0.950624	-6.17614	0.151643	PGF	placental growth factor
221756_at	0.00133	3.99e-05	PIK3IP1	-5.07106	2.13226	-0.783826	PIK3IP1	phosphoinositide-3-kinase interacting protein 1
221757_at	0.648	0.424	PIK3IP1	0.813278	-6.29623	0.0826692	PIK3IP1	phosphoinositide-3-kinase interacting protein 1
214146_s_at	0.613	0.385	PPBP	-0.885389	-6.23536	-0.367022	PPBP	pro-platelet basic protein
205445_at	0.987	0.968	PRL	0.040024	-6.62981	0.0047173	PRL	prolactin
221373_x_at	0.0357	0.00423	PSPN	3.17647	-2.35906	0.344298	PSPN	persephin
209465_x_at	0.0592	0.0089	PTN	2.85978	-3.05498	0.938224	PTN	pleiotrophin
211737_x_at	0.235	0.0766	PTN	1.85491	-4.98861	0.910635	PTN	pleiotrophin
209466_x_at	0.543	0.311	PTN	1.03658	-6.09222	0.386074	PTN	pleiotrophin
208408_at	0.604	0.374	PTN	0.906502	-6.21662	0.110367	PTN	pleiotrophin
205334_at	0.0465	0.0062	S100A1	3.01518	-2.7173	0.401439	S100A1	S100 calcium binding protein A1
200872_at	0.729	0.528	S100A10	-0.641624	-6.42136	-0.123878	S100A10	S100 calcium binding protein A10
200660_at	0.55	0.317	S100A11	-1.02216	-6.10676	-0.335133	S100A11	S100 calcium binding protein A11
213481_at	0.507	0.275	S100A13	-1.1194	-6.00513	-0.246774	S100A13	S100 calcium binding protein A13
202598_at	0.918	0.827	S100A13	0.220431	-6.60573	0.055094	S100A13	S100 calcium binding protein A13
218677_at	0.012	0.000872	S100A14	3.82713	-0.85438	0.612186	S100A14	S100 calcium binding protein A14
204268_at	0.173	0.0473	S100A2	2.0967	-4.57142	0.938526	S100A2	S100 calcium binding protein A2
206027_at	0.187	0.0535	S100A3	2.03613	-4.67927	0.217546	S100A3	S100 calcium binding protein A3
203186_s_at	0.201	0.0602	S100A4	1.97732	-4.78189	0.701338	S100A4	S100 calcium binding protein A4
207763_at	0.815	0.649	S100A5	-0.460566	-6.52233	-0.0405539	S100A5	S100 calcium binding protein A5
217728_at	0.232	0.0751	S100A6	-1.86481	-4.97225	-0.504983	S100A6	S100 calcium binding protein A6
202917_s_at	0.273	0.0981	S100A8	-1.72486	-5.19751	-1.20012	S100A8	S100 calcium binding protein A8
214370_at	0.89	0.776	S100A8	-0.288522	-6.58801	-0.152853	S100A8	S100 calcium binding protein A8
203535_at	0.952	0.891	S100A9	0.138132	-6.62085	0.0454463	S100A9	S100 calcium binding protein A9
209686_at	0.0219	0.00206	S100B	3.47541	-1.67773	0.302555	S100B	S100 calcium binding protein B
207885_at	0.553	0.32	S100G	1.0161	-6.11281	0.0869348	S100G	S100 calcium binding protein G
219197_s_at	0.467	0.238	SCUBE2	-1.21069	-5.90225	-0.275631	SCUBE2	signal peptide, CUB domain and EGF like domain containing 2
217600_at	0.701	0.489	SCUBE3	-0.702607	-6.38014	-0.090522	SCUBE3	signal peptide, CUB domain and EGF like domain containing 3
202037_s_at	0.0135	0.00102	SFRP1	3.76505	-1.00103	1.32596	SFRP1	secreted frizzled related protein 1				2.9914
202036_s_at	0.022	0.00209	SFRP1	3.47028	-1.68958	1.78059	SFRP1	secreted frizzled related protein 1				2.67985
202035_s_at	0.0801	0.0143	SFRP1	2.65068	-3.496	1.18019	SFRP1	secreted frizzled related protein 1				1.84466
204051_s_at	0.012	0.000876	SFRP4	3.82535	-0.85859	0.935507	SFRP4	secreted frizzled related protein 4
204052_s_at	0.0581	0.00868	SFRP4	2.87064	-3.03163	0.887247	SFRP4	secreted frizzled related protein 4
207468_s_at	0.734	0.535	SFRP5	0.629155	-6.42934	0.0635277	SFRP5	secreted frizzled related protein 5
207586_at	0.0514	0.00719	SHH	2.95186	-2.85584	0.240818	SHH	sonic hedgehog
213780_at	0.98	0.952	TCHH	0.060916	-6.62873	0.0048064	TCHH	trichohyalin
205016_at	0.00567	0.000302	TGFA	4.25562	0.16843	0.806685	TGFA	transforming growth factor alpha
205015_s_at	0.317	0.125	TGFA	1.59256	-5.39802	0.138409	TGFA	transforming growth factor alpha
211258_s_at	0.444	0.218	TGFA	1.26676	-5.83555	0.173853	TGFA	transforming growth factor alpha
203084_at	0.486	0.256	TGFB1	1.16589	-5.95363	0.139769	TGFB1	transforming growth factor beta 1
203085_s_at	0.653	0.431	TGFB1	0.801264	-6.3059	0.087692	TGFB1	transforming growth factor beta 1
220407_s_at	0.0989	0.0198	TGFB2	2.50545	-3.79202	0.21796	TGFB2	transforming growth factor beta 2
220406_at	0.353	0.149	TGFB2	1.49454	-5.53832	0.134008	TGFB2	transforming growth factor beta 2
209909_s_at	0.511	0.278	TGFB2	1.11163	-6.01356	0.198491	TGFB2	transforming growth factor beta 2
209908_s_at	0.726	0.522	TGFB2	-0.649899	-6.41598	-0.0706627	TGFB2	transforming growth factor beta 2
209747_at	0.758	0.567	TGFB3	0.580792	-6.45888	0.0835954	TGFB3	transforming growth factor beta 3
211154_at	0.37	0.161	THPO	1.4492	-5.60075	0.108059	THPO	thrombopoietin
211155_s_at	0.476	0.246	THPO	1.19068	-5.92541	0.108426	THPO	thrombopoietin
211831_s_at	0.597	0.366	THPO	0.922152	-6.20247	0.0890761	THPO	thrombopoietin
207113_s_at	0.277	0.101	TNF	1.71137	-5.21853	0.22014	TNF	tumor necrosis factor
214329_x_at	0.00516	0.000263	TNFSF10	4.31052	0.3004	0.883264	TNFSF10	tumor necrosis factor superfamily member 10
202688_at	0.267	0.0941	TNFSF10	1.74707	-5.16265	0.499118	TNFSF10	tumor necrosis factor superfamily member 10
202687_s_at	0.604	0.374	TNFSF10	0.90581	-6.21724	0.336695	TNFSF10	tumor necrosis factor superfamily member 10
210643_at	0.0726	0.0123	TNFSF11	2.7196	-3.35247	0.314216	TNFSF11	tumor necrosis factor superfamily member 11
211153_s_at	0.937	0.86	TNFSF11	0.17795	-6.6144	0.0204739	TNFSF11	tumor necrosis factor superfamily member 11
210314_x_at	0.0429	0.00551	TNFSF13	3.06551	-2.60629	0.59468	TNFSF13	tumor necrosis factor superfamily member 13
207907_at	0.918	0.827	TNFSF14	-0.221032	-6.6056	-0.0250846	TNFSF14	tumor necrosis factor superfamily member 14
221085_at	0.00653	0.00037	TNFSF15	4.17394	-0.02763	0.531667	TNFSF15	tumor necrosis factor superfamily member 15
221371_at	0.723	0.519	TNFSF18	0.655114	-6.41255	0.102505	TNFSF18	tumor necrosis factor superfamily member 18
207426_s_at	0.314	0.123	TNFSF4	-1.59979	-5.38739	-0.265513	TNFSF4	tumor necrosis factor superfamily member 4
207216_at	0.621	0.394	TNFSF8	0.868583	-6.24998	0.126236	TNFSF8	tumor necrosis factor superfamily member 8
206907_at	0.724	0.519	TNFSF9	0.654415	-6.41301	0.0829992	TNFSF9	tumor necrosis factor superfamily member 9
210342_s_at	0.883	0.763	TPO	0.304635	-6.58313	0.0337791	TPO	thyroid peroxidase
211527_x_at	6.66e-05	5.92e-07	VEGFA	-6.8361	6.23678	-1.58624	VEGFA	vascular endothelial growth factor A
212171_x_at	9e-05	8.97e-07	VEGFA	-6.65512	5.832	-1.4228	VEGFA	vascular endothelial growth factor A
210513_s_at	0.00168	5.48e-05	VEGFA	-4.94273	1.8238	-1.92112	VEGFA	vascular endothelial growth factor A
210512_s_at	0.00304	0.000122	VEGFA	-4.61939	1.04458	-1.48004	VEGFA	vascular endothelial growth factor A
203683_s_at	0.0296	0.00324	VEGFB	3.28819	-2.10683	0.632056	VEGFB	vascular endothelial growth factor B
209946_at	0.0397	0.00492	VEGFC	-3.11335	-2.50012	-0.612291	VEGFC	vascular endothelial growth factor C
204712_at	0.146	0.0364	WIF1	2.22248	-4.34083	0.404133	WIF1	WNT inhibitory factor 1
208570_at	0.54	0.308	WNT1	1.04251	-6.08618	0.141288	WNT1	Wnt family member 1
206213_at	0.245	0.0821	WNT10B	-1.81876	-5.04781	-0.373595	WNT10B	Wnt family member 10B
206737_at	0.942	0.872	WNT11	-0.162338	-6.61712	-0.0287737	WNT11	Wnt family member 11
221113_s_at	0.00415	0.000193	WNT16	4.43543	0.6011	0.424318	WNT16	Wnt family member 16
205648_at	0.894	0.784	WNT2	0.277875	-6.59109	0.0340875	WNT2	Wnt family member 2
206458_s_at	0.0576	0.00857	WNT2B	2.87625	-3.01957	0.71795	WNT2B	Wnt family member 2B
206459_s_at	0.815	0.649	WNT2B	0.460872	-6.52219	0.0479454	WNT2B	Wnt family member 2B
208606_s_at	0.203	0.061	WNT4	1.97093	-4.79291	0.205506	WNT4	Wnt family member 4
205990_s_at	0.113	0.0241	WNT5A	-2.41681	-3.96813	-0.528634	WNT5A	Wnt family member 5A
213425_at	0.319	0.126	WNT5A	-1.588	-5.4047	-0.324742	WNT5A	Wnt family member 5A
221029_s_at	0.041	0.00517	WNT5B	-3.0924	-2.54669	-0.443922	WNT5B	Wnt family member 5B
221608_at	0.126	0.0288	WNT6	2.33375	-4.12975	0.226609	WNT6	Wnt family member 6
221609_s_at	0.364	0.157	WNT6	1.46472	-5.57956	0.167031	WNT6	Wnt family member 6
71933_at	0.832	0.678	WNT6	0.420827	-6.54014	0.086573	WNT6	Wnt family member 6
222086_s_at	0.849	0.705	WNT6	0.383662	-6.55537	0.0252007	WNT6	Wnt family member 6
210248_at	0.148	0.0373	WNT7A	2.21121	-4.36185	0.219268	WNT7A	Wnt family member 7A
217681_at	0.188	0.0538	WNT7B	2.03295	-4.68486	0.220333	WNT7B	Wnt family member 7B
207612_at	0.986	0.966	WNT8B	0.043145	-6.62968	0.0062316	WNT8B	Wnt family member 8B
206366_x_at	0.0817	0.0147	XCL1	2.6381	-3.52198	0.518498	XCL1	X-C motif chemokine ligand 1
206365_at	0.412	0.192	XCL1	1.34493	-5.73823	0.124427	XCL1	X-C motif chemokine ligand 1

## Sheet: GSE 116626 DEGs
Supplementary Table 2C. DEGs of GSE 116626
ID	adj.P.Val	P.Value	SYMBOL	t	B	logFC	GI	Symbol	SEQUENCE	GB_ACC
ILMN_3311005	0.000642	2.99e-08	MIR212	8.68113	7.69707	1.84692	262206296	MIR212	CACCTTGGCTCTAGACTGCTTACTGCCCGGGCCGCCCTCAGTAACAGTCT	NR_029625.1
ILMN_1781001	0.000642	4.37e-08	SOCS3	8.47884	7.4243	1.97521	45439351	SOCS3	CCATGGAGAGGGACCCAGCATAGGAAAGCCACATACTCAGCCTGGATGGG	NM_003955.3
ILMN_1699651	0.006505	6.65e-07	IL6	7.09941	5.37868	2.48055	10834983	IL6	TGCAGTCCAGCCTGAGGGCTCTTCGGCAAATGTAGCATGGGCACCTCAGA	NM_000600.1
ILMN_1717639	0.007215	9.83e-07	SIK1	6.9111	5.07364	2.02611	116256470	SIK1	CCATCTTGGGGCAGCCAGGCCCTTGCCTTCATTTTTACAGAGGTAGCACA	NM_173354.3
ILMN_1744381	0.012025	2.15e-06	SERPINE1	6.54027	4.45468	2.14568	10835158	SERPINE1	GGAGCAGAAATGCAAGGGGCTGCATGACCTACCAGGACAGAACTTTCCCC	NM_000602.1
ILMN_1770085	0.012025	2.46e-06	BTG2	6.47879	4.34975	1.10927	28872718	BTG2	CCAAACACTCTCCCTACCCATTCCTGCCAGCTCTGCCTCCTTTTCAACTC	NM_006763.2
ILMN_1787212	0.016232	4.11e-06	CDKN1A	6.24082	3.93746	3.6004	17978494	CDKN1A	GAGGATGCGTGTTCGCGGGTGTGTGCTGCGTTCACAGGTGTTTCTGCGGC	NM_078467.1
ILMN_1667771	0.016232	4.59e-06	GRB10	6.1902	3.84852	1.64771	48762694	GRB10	CCCCCCATTGTGAGTGGTCCGTGAAGCACAGCGTTGACCAGACCTAAACC	NM_001001550.1
ILMN_2408566	0.016232	4.97e-06	NR4A1	6.15349	3.78376	3.526	27894343	NR4A1	GAGAGCTATTCCATGCCTACGGCCTTCCCAGGTTTGGCACCCACTTCTCC	NM_173157.1
ILMN_1722781	0.016974	5.78e-06	EGR3	6.08507	3.66243	2.55184	31317227	EGR3	GAGAGAGAAGAAGATGAAGTTTGCCAGGAGGGCCCATATTTTTTCAGCTG	NM_004430.2
ILMN_2411897	0.019951	7.47e-06	KLF10	5.96854	3.45402	2.02205	5032176	KLF10	ACCTCCAACCCCTGCTCCCACACAGTGACAGACCGGAAAGTGAAGAGTCA	NM_005655.1
ILMN_1751607	0.022114	9.04e-06	FOSB	5.88286	3.29936	3.32099	5803016	FOSB	TGGGCCGTCCCCTCTCCCCTTGGTTCTGCACTGTTGCCAATAAAAAGCTC	NM_006732.1
ILMN_2086077	0.022328	9.97e-06	JUNB	5.83869	3.21917	1.64057	44921611	JUNB	AACGGCTGTCAGCTGCTGCTTGGGGTCAAGGGACACGCCTTCTGAACGTC	NM_002229.2
ILMN_1711120	0.022328	1.06e-05	ARC	5.80928	3.16562	2.39438	56676395	ARC	CAGACCACTCTGACAAGTCTTCAGCCCACACCCTGCCAGCCCCACAGATT	NM_015193.3
ILMN_3240236	0.025166	1.29e-05	SMCR5	-5.72488	3.01114	-1.43439	193211411	SMCR5	CTTGGGAAGCTGAGGTAGGAGGATTGCTTGAGCCCATGAAGTCAGGCTGC	NR_024007.1
ILMN_2241168	0.029511	1.69e-05	MAFF	5.60388	2.78777	1.94964	23111002	MAFF	GGAAGGAGCCATTCAAGGAGGCCTGTGGACCAATGTGGAGAGAGGAAGGT	NM_152878.1
ILMN_1674908	0.029511	1.73e-05	HOXB5	-5.5917	2.76516	-0.858537	85380096	HOXB5	AGTGAGCGAGTGGATGCTGTGCTACGTGTGAAATCTGTCTTTGCGGGGCC	NM_002147.3
ILMN_1704529	0.029511	1.81e-05	PPIA	5.57294	2.73029	2.12167	114520617	PPIA	CAGAGGCAGGAAAAGCAAGGAGCCAGAATTAAGAGGTTGGGTCAGTCTGC	NM_021130.3
ILMN_1711439	0.03397	2.2e-05	EMILIN1	-5.4868	2.56954	-2.24471	5901943	EMILIN1	GCCGCCCATGCAGACTTTTGGCCTGGCGCGATCCCCCAAGAACCCCTCCA	NM_007046.1
ILMN_1791346	0.035877	2.44e-05	ATF3	5.44009	2.48192	2.42565	95102482	ATF3	CCGCCTCTGTGGCATCACCAGGGTTTCTCTGAAGAAGAGGGTCTGCATTT	NM_001040619.1
ILMN_1680618	0.037505	2.68e-05	MYC	5.3991	2.40477	1.31387	71774082	MYC	CCTGCGTGACCAGATCCCGGAGTTGGAAAACAATGAAAAGGCCCCCAAGG	NM_002467.3
ILMN_1689336	0.041256	3.09e-05	HOXA10	-5.33682	2.28711	-0.904515	83977447	HOXA10	CAGAAGCCTAGGAGGACTGGGGTAAGCGGAATAAACTAGAGAAGGGAGAC	NM_018951.3
ILMN_1786319	0.045447	3.65e-05	MME	5.26375	2.14837	2.32006	116256326	MME	CTCATTGGTCGGGATGTGTCGGCTCAGCAGCCTCCAACTTCTCCCGAATC	NM_007287.2
ILMN_1694966	0.045447	3.71e-05	ASGR2	-5.25638	2.13434	-2.46908	18426876	ASGR2	TGACCCCAGCACACCTCTGGCTAACCCATACCCCACACCTGCCCAGCTCT	NM_080914.1
ILMN_2382687	0.046285	4.07e-05	NR4A3	5.2166	2.05847	3.17886	27894354	NR4A3	CGAGCAACTACGAACTCAAGCCTTCCTGCGTGTACCAAATGCAGCGGCCC	NM_006981.2
ILMN_1671509	0.046285	4.13e-05	CCL3	5.20991	2.04569	2.22188	4506842	CCL3	CCTCTGCACCATGGCTCTCTGCAACCAGTTCTCTGCATCACTTGCTGCTG	NM_002983.1
ILMN_2374865	0.046285	4.26e-05	ATF3	5.19699	2.021	2.76375	95102482	ATF3	CTCCCAGCGTTAACACAAAATCCATGGGCAGTATGATGGCAGGTCCTCTG	NM_001040619.1
ILMN_1737406	0.048386	4.61e-05	KLF6	5.16181	1.95364	1.11247	56550082	KLF6	GCGGACGCACACAGGAGAAAAGCCTTACAGATGCTCATGGGAAGGGTGTG	NM_001008490.1
ILMN_1771841	0.048521	4.79e-05	FOSL1	5.14532	1.92202	2.26507	34734076	FOSL1	CACTGCCACACTCTCCATCACCCTCTTCCTGTGATCCACCCAACCCTATC	NM_005438.2
ILMN_2413779	0.050226	5.13e-05	SEZ6L2	-5.11556	1.86485	-1.22734	42491357	SEZ6L2	ATGGCCCTGGAGATCCTACAGTAAATAAACCAGCATCCTGCCGCCCAAAA	NM_201575.1
ILMN_3249244	0.053581	5.66e-05	TMEM106A	-5.07324	1.78338	-1.43236	21450795	TMEM106A	GGCTACTCGGGAGGCTGAGGCAGCAGAATCACTTGAAACCGGAAGGCAGA	NM_145041.1
ILMN_1661178	0.063289	6.9e-05	NR4A1	4.98733	1.61733	3.21746	27894342	NR4A1	TGTTGCCAAGACCTGCCTGAAGCCGGATTCTCCCCACTGCCTCCTTCAAC	NM_002135.3
ILMN_1707312	0.063891	7.18e-05	NFIL3	4.96993	1.58358	0.84187	52630428	NFIL3	CACTCAAGAGACTTATAGCCACACAACCAATCTCTGCTTCAGACTCTGGG	NM_005384.2
ILMN_2410145	0.064452	7.46e-05	NR4A1	4.95324	1.5512	3.21698	27894345	NR4A1	GGAGAGTTTGACACCTTCCTCTACCAGCTGCCAGGAACAGTCCAGCCATG	NM_173158.1
ILMN_3230572	0.074623	8.89e-05	NCRNA00152	4.87748	1.40376	1.96264	209413711	NCRNA00152	TGAACGCAGTGGAGGGCCACTGGGGCCGGAGCAGCCGAGAGATTTCAGGA	NR_024205.1
ILMN_1709439	0.083961	0.000103	CHMP1A	-4.81456	1.28086	-1.14319	103485495	CHMP1A	AACGTCCTTCTGTCCATCGTGGGTAACAGCCTTGGGGAGGGTGCAGAGCT	NM_002768.2
ILMN_1724280	0.085178	0.000107	EGR3	4.79658	1.24566	1.96116	31317227	EGR3	ACCCAGCCTCATACCGCACCAGCTGAGGCACCCAAGAGGATTACCCCCTG	NM_004430.2
ILMN_1694593	0.087886	0.000114	FAHD1	4.77166	1.19682	1.9472	66348061	FAHD1	CCTGGCTGGGAGTTCTGAGGGCAGGAACTGTGTCTTGTGCCTGGAAAGCA	NM_001018104.1
ILMN_1652866	0.09433	0.000125	LMX1B	4.7301	1.11525	2.40941	4505006	LMX1B	AGGGCATGATGGCTTCCTACACGCCGCTGGCCCCACCACAGCAGCAGATC	NM_002316.1
ILMN_1700413	0.103631	0.000141	MAFF	4.67889	1.01449	1.40928	23111001	MAFF	ACCTGCGGCTCAGAGCGGAGGGGAGACTGACCGGAGCGCGGATCGGGACA	NM_012323.2
ILMN_1671843	0.104389	0.000146	PSRC1	-4.66517	0.98748	-2.46769	73858558	PSRC1	CCTGAATCGCATTCTCTACTGGACTCTGGCCTGCTTGGAGAGGTGGCAGC	NM_001032290.1
ILMN_2336609	0.105097	0.000153	SYTL2	-4.6451	0.9479	-0.807177	46255065	SYTL2	GGGTCTGGTACCCTTGCAGGACCTTTGTAGGTTGTGGGAAAAAGTCGCAG	NM_206929.1
ILMN_2075436	0.105097	0.000157	PDIA3P	-4.63228	0.92262	-0.896514	62510077	PDIA3P	AAGGACTCTTCCACCAGAGATGGGAAAACCACTGGGGAGGACTAGGACCC	NR_002305.1
ILMN_1762899	0.105097	0.000157	EGR1	4.63201	0.92208	1.90222	31317226	EGR1	CGTCTTGGTGCCTTTTGTGTGATGCGCCTTGCTGATGGCTTGACATGTGC	NM_001964.2
ILMN_2232494	0.105362	0.000161	C5orf42	-4.62131	0.90095	-1.47652	38604072	C5orf42	GCAGCAAGTTGAATGCAGAAGCAGGTATGGTAATTCAGCTGCCTTCTATC	NM_023073.2
ILMN_1731610	0.105971	0.000166	ABLIM1	4.60943	0.87749	2.02037	51173716	ABLIM1	AGTCTGTCGGGCTGAGGTCTGGCATCTACAAAGCCTCTTGGCCGTGTTCT	NM_006720.3
ILMN_2322375	0.107312	0.000175	MAFF	4.58581	0.83082	1.16519	23111001	MAFF	GGGAAAGCCGGAGAGCAACAACAAAAAATGTTTAAGCCGGGCGCGGTGGC	NM_012323.2
ILMN_1711062	0.107312	0.000195	MMP19	4.54051	0.74115	1.81143	75905804	MMP19	GCTCCCCCAAGGCTCCCAGAAATCTCAGGTCAGAGGCACGGACAGCCTCT	NM_002429.4
ILMN_1803714	0.107312	0.000195	MMP20	4.54035	0.74083	1.10134	45359864	MMP20	GCTGTCTACCTCAGGGAGCCACAGAAGACCCTTTTCTTTGTGGGAGATGA	NM_004771.3
ILMN_2335813	0.107312	0.000198	GCH1	4.53435	0.72895	1.76362	66932969	GCH1	GCCTCGGCCATGCAGTTCTTCACCAAGGGCTACCAGGAGACCATCTCAGA	NM_001024070.1
ILMN_3307877	0.107312	0.000198	C21orf58	-4.53369	0.72764	-1.20493	47080100	C21orf58	AGCTCTGGGGGCTGAGGTGGGAGGATTGCTTGAGCCCAGGAGTTAGAAGC	NM_058180.3
ILMN_1682636	0.107312	0.0002	CXCL2	4.53071	0.72174	2.14663	148298657	CXCL2	TCGTGATGACATATCACATGTCAGCCACTGTGATAGAGGCTGAGGAATCC	NM_002089.3
ILMN_1738578	0.107312	0.000208	FILIP1L	4.51275	0.68613	1.33445	109659848	FILIP1L	CTGACCACGCTCACCCTCATCCAGTCCATACTGATATTTTTGCAAGGAAC	NM_014890.2
ILMN_1782953	0.107312	0.000213	MMP19	4.50308	0.66696	2.25132	75905805	MMP19	GCACTGCTCCCCCAAGGCTCCCAGAAATCTCAGGTCAGAGGCACGGACAG	NM_001032360.1
ILMN_1724540	0.107312	0.000214	CART1	-4.50084	0.66252	-2.20389	5901917	CART1	GGTCTTCCAGTATCGCAGTTCTTCGAATGAAAGCCAAGGAGCACACCGCC	NM_006982.1
ILMN_1705986	0.107312	0.000218	MAFK	4.49197	0.64491	1.49818	82617644	MAFK	CCCTGTGGTCAGGTCTAGCATGGGGCTTGTTTTCCACTCCTGCTGTAAGC	NM_002360.3
ILMN_1668566	0.107312	0.000221	ANUBL1	-4.48765	0.63633	-0.848397	28376663	ANUBL1	CAGGCTTCCACATTGTACAGAATGAGCAGTCATGTAATGAATGGCTCTAC	NM_174890.1
ILMN_2059780	0.107312	0.000221	CYP4A22	4.48713	0.6353	2.1282	62952505	CYP4A22	GGAACTGCATCGGGAAACAATTTGCCATGAACCAGCTGAAGGTGGCCAGG	NM_001010969.2
ILMN_1730809	0.107312	0.000227	SLC29A2	-4.47519	0.61161	-1.27495	38708298	SLC29A2	GGTGACAAAACTGAGTCCTGGGGAAAGTGACTGGTCCGTGGTAGAGCCGG	NM_001532.2
ILMN_1718898	0.107312	0.000228	HOXC9	-4.47365	0.60856	-0.837107	24497546	HOXC9	TTTTTTCCCTGTATCGTATTTGGTCCAGGTCATCCCTCCCCGGGCCTGGG	NM_006897.1
ILMN_1789642	0.107312	0.000229	DNAJC5	4.47209	0.60545	1.9336	45504381	DNAJC5	AGTGGGGTGCCTCCGTGCCGCTTCGTGCAGCAGCAAGTTCAGCCTGAGAT	NM_025219.1
ILMN_1657554	0.107312	0.00023	TSPYL2	4.47039	0.60207	0.89112	11545834	TSPYL2	GCCCTCCGCCCCCGCAGGCTTCTGTGTGCTGCTAACTGTATTTATTGTGA	NM_022117.1
ILMN_2298727	0.107312	0.00023	MAPT	4.46958	0.60047	1.90521	82534350	MAPT	TGGAAATCACACCCAACGTGCAGAAGGAGCAGGCGCACTCGGAGGAGCAT	NM_016835.2
ILMN_1658163	0.110655	0.000241	NR4A3	4.44976	0.56109	2.73387	27894356	NR4A3	CCACTGGCTTTCTCTTTGTCCCCCTAGGTTATAGCTGAGGAGCCCACTCC	NM_173198.1
ILMN_1750596	0.113759	0.000252	CLUAP1	-4.43134	0.52446	-0.743395	13435144	CLUAP1	CAGGTTTCCTGCAGCTCGCTACCTAAGTGTTTCTGTAGGGGAAGGAGCCA	NM_024793.1
ILMN_1761031	0.119145	0.000268	PTPDC1	-4.40508	0.47224	-0.978649	30089951	PTPDC1	TGGGAAATTGAGTCCAGTGGATGTTAATGGAGTGGGTTGCCCATCCCTGA	NM_152422.3
ILMN_1667594	0.135993	0.000319	KLF10	4.33017	0.323	1.04475	73760402	KLF10	ACACACACGCGCGCTGTCCATTGCAGCTTACATAAAGGCGGGCGCGATTA	NM_001032282.1
ILMN_2169983	0.135993	0.000324	ATAD1	-4.32357	0.30983	-1.25411	31377643	ATAD1	CCAGAATTCTGTTATAGGCACCTAACCACGCAGCATGAGGAAAACGGCAC	NM_032810.2
ILMN_1773079	0.135993	0.000332	COL3A1	-4.31393	0.29061	-1.40015	110224482	COL3A1	TCAACTGCTTGTAAAGGTGCTCCTCTTTTTTCTTGTCATTGCTGGTCAAG	NM_000090.3
ILMN_1651346	0.135993	0.000335	TICAM2	-4.30943	0.28163	-1.25769	48675828	TICAM2	ACTGCCCACTCTTCATGCCTGCCAAACTTGGGGCAATTGATGCTAAATGG	NM_021649.3
ILMN_1688423	0.135993	0.000336	FCER1A	-4.30879	0.28034	-1.35269	31317229	FCER1A	GAACCAGGAAAGGCTTCAGACTTCTGAACCCACATCCTAAGCCAAACCCC	NM_002001.2
ILMN_1765109	0.135993	0.000341	TNFRSF25	-4.30166	0.26612	-2.22298	23200036	TNFRSF25	CACCTAGGCGCTCTGGTGGCCCTTGCAGAAGCCCTAAGTACGGTTACTTA	NM_148973.1
ILMN_1781285	0.135993	0.000343	DUSP1	4.29971	0.26222	0.977985	7108342	DUSP1	GCAGAAGAGAAAGGACTCAGTGTGTGATCCGGTTTCTTTTTGCTCGCCCC	NM_004417.2
ILMN_1689552	0.135993	0.000344	FAM63A	-4.29771	0.25824	-0.819692	94158672	FAM63A	CCTTCCTGGGGTTTGGAAATAAAACTTCTGGCCGGGCACGGTGGCTCACT	NM_018379.3
ILMN_2149952	0.135993	0.000347	FLJ45256	-4.29419	0.25121	-1.58026	46409519	FLJ45256	GTGAGCCAAAATGGCGCTACTGCACTCCAGACCGGGGACAGAGTGAGACT	NM_207448.1
ILMN_1680805	0.140099	0.00037	IL28RA	4.26708	0.19708	1.89093	28416908	IL28RA	GTACCGATGTTCTCTCTGGCACCAGCCGAGCTGCTTCGTGGAGGTAACTT	NM_173064.1
ILMN_1814600	0.140099	0.00037	DEPDC1B	4.26673	0.19638	1.48053	23510330	DEPDC1B	AGATGCCACCCCTGTGTGATGGCTTTGGTACCCGAACACTGATGGTTCAG	NM_018369.1
ILMN_1664833	0.140099	0.000372	MRPL50	-4.2648	0.19253	-1.52092	21265095	MRPL50	GGGCACTGTCAACTTGGGTTTAAGACAGGAGGACATTGCAAGTTCACACC	NM_019051.1
ILMN_1653412	0.143874	0.000387	RAXL1	-4.24805	0.15906	-1.91523	20127653	RAXL1	TTGAGACCAGCCTGGGTGACACAGCAAGACCCCATCTCCACAAACGTTTT	NM_032753.2
ILMN_1779228	0.146333	0.000399	CDH2	-4.23547	0.13394	-0.94656	14589888	CDH2	GCCTCTGTATTGTGTACCAGAATATAAATGATACACCTCTGACCCCAGCG	NM_001792.2
ILMN_1722718	0.148179	0.000409	BMP2	4.22484	0.11269	1.2278	80861484	BMP2	TTGTGGCTCCCCCGGGGTATCACGCCTTTTACTGCCACGGAGAATGCCCT	NM_001200.2
ILMN_1680139	0.148905	0.000416	MAFF	4.21697	0.09696	1.84613	23111001	MAFF	GCTCCTGCTCCCTGGGAAAAGTGGCGTATGGCCCTGAGCTGGGCTTTATA	NM_012323.2
ILMN_2316878	0.148905	0.000425	PTPRO	4.20838	0.07979	1.64627	13677221	PTPRO	GTTGGTGTTTCTTCCTTGGCCCTTTTGGACTAATGTTACTGTCCAAGTTC	NM_030671.1
ILMN_1680993	0.148905	0.000426	TRIM10	4.20727	0.07756	1.40773	16519562	TRIM10	TAAGATGTGAAACCAGAAAGTGCCGGAAACCGGTGGCTGTGTCGCCAGAG	NM_006778.2
ILMN_3247256	0.14994	0.000435	LOC646996	-4.19853	0.06008	-1.31894	153792578	LOC646996	GAATCGCTTGAACCCAGGAGGCAGAGATTGCAGTGAGCCAAGACTGTGCC	NR_003543.1
ILMN_1669523	0.14994	0.000439	FOS	4.1943	0.05162	2.90906	6552332	FOS	CCCAGTGACACTTCAGAGAGCTGGTAGTTAGTAGCATGTTGAGCCAGGCC	NM_005252.2
ILMN_1734855	0.151264	0.000451	SELPLG	-4.183	0.02902	-1.56893	68160948	SELPLG	ATTCCACTTCCTCCATTACCCAGTTTTGGCCCACAGAGTTTGGTCCCCCC	NM_003006.3
ILMN_1721241	0.151264	0.000458	PSCD2	-4.1768	0.01662	-0.706413	47157331	PSCD2	GATTTCAGTCAAGAAGAAGCAGGAGCAGCCCTGACCCCCTGCCCCCAACT	NM_004228.4
ILMN_2177090	0.151264	0.000458	LOC200030	-4.17595	0.01492	-1.09986	119709824	LOC200030	ACCTCAGCCCATCTGCGGGCAGAGAAGGTCTAGTTTGTCCAACACCATTA	NM_183372.3
ILMN_1786444	0.151472	0.000465	LPL	4.1698	0.00261	1.00282	145275217	LPL	ACTTAAAAGATTCACTAAAGCAGCACATAGCACTGGGAACTCTGGCTCCG	NM_000237.2
ILMN_1743402	0.151472	0.000469	SIX4	-4.1659	-0.00518	-2.04985	142976637	SIX4	ACAGAGTCTTTACTGCACTGTTAGGTGATGGCACACAGAGCATGTCCCAG	NM_017420.3
ILMN_1765232	0.155801	0.000488	C10orf59	4.14925	-0.03851	1.21408	142385235	C10orf59	GCCTTCCCTCGTGATTCACACCACTGTCCCATTTGGAGTTACATACTTGG	NM_018363.2
ILMN_2179083	0.156719	0.000501	LOXL4	-4.13801	-0.061	-0.802278	67782348	LOXL4	AGGCCACCATTCCTGCTTGATGGGGCTCTGATTTGCTCTTGCTCAAGTGG	NM_032211.6
ILMN_1730794	0.156719	0.000507	SERTAD4	-4.13314	-0.07076	-1.34661	19923818	SERTAD4	CACCTGTCTAGGGGCGGCAATCAACAGTCTTACACAGAGAGGGTATTCCC	NM_019605.2
ILMN_3241626	0.156719	0.000512	QRFPR	-4.12873	-0.07958	-0.876836	157738684	QRFPR	CCTTAAAAAAGCAACATGGAAGGCCAGGCACGGTGGCTCATGCCTGTAAT	NM_198179.2
ILMN_1723412	0.156719	0.000512	ASCL2	-4.12863	-0.07979	-0.831044	42716308	ASCL2	AAGAACCCTTGACCTGGGGCGTAATAAAGATGACCTGGACCCCTGCCCCC	NM_005170.2
ILMN_2328666	0.160049	0.000529	CD83	4.11526	-0.10655	2.1662	94420687	CD83	TGGGTGCTCGCCCACTTGTCCCACTATCTGGGTGCATGATCTTGAGCAAG	NM_004233.3
ILMN_1798496	0.161459	0.00054	HOXB8	-4.10599	-0.1251	-1.28666	85543349	HOXB8	GTTGTTCCTCTATACTTTGTTCTGTTGTCTGCGCCTGAAAAGGGCGGAAG	NM_024016.3
ILMN_2070043	0.161459	0.000548	PPM1K	-4.0997	-0.13772	-1.02653	31542532	PPM1K	GCAACCATGCAAAAGAAATTAATTTGGCCAGGCACAGTGGCTCATGCCTG	NM_152542.2
ILMN_2061043	0.161459	0.00055	CD48	-4.09856	-0.14	-2.19832	21361570	CD48	GGACAGAGACTGTATAGGCTGACCAGAAGCATGCTGCTGAATTATCAACG	NM_001778.2
ILMN_1782922	0.163091	0.000563	PDE4B	4.08819	-0.16076	1.54402	82799480	PDE4B	GCAGTGGTGTCGTTCACCGTGAGAGTCTGCATAGAACTCAGCAGTGTGCC	NM_002600.3
ILMN_1668847	0.163091	0.000566	WWP2	4.08584	-0.16546	1.85494	40806210	WWP2	TACCGCCTCCTCCCCGTCGCTCTGCCTTTTCCAAAACTCACTTGGGCCCT	NM_199424.1
ILMN_2261379	0.172009	0.000603	SRGAP2	4.05902	-0.21919	1.39438	112363099	SRGAP2	GGAGGAGAGTCCTTCTCGGCAGAGCTCACTGCAAACAACTGGAATTGAGG	NM_015326.2
ILMN_2174380	0.174443	0.000618	KIAA1804	-4.04892	-0.23942	-1.08786	24308329	KIAA1804	TGATACAAATCCAGAGTTATTGGTGCAGAAATGGCTACCCGAGAGCTTGG	NM_032435.1
ILMN_1719543	0.177265	0.000634	MAF	4.03769	-0.26192	0.752022	73427804	MAF	GCAGCGACAACCCGTCCTCTCCCGAGTTTTTCATAACTGAGCCCACTCGC	NM_005360.3
ILMN_1704985	0.177265	0.00064	CYP27A1	4.03398	-0.26937	1.14101	13904863	CYP27A1	GGAGACGGGGGAGTTGAAGAGTGTGGCCCGCATTGTCCTGGTTCCCAATA	NM_000784.2
ILMN_2363027	0.179603	0.000654	RAD51	-4.0244	-0.28856	-1.34791	19924134	RAD51	TGCACTGCTGCATTCCAGCCAGGGTGACAGAGTGAGACCATGTTTCAAAC	NM_133487.1
ILMN_1724349	0.189374	0.000696	RGS3	3.99787	-0.34171	0.660496	62865655	RGS3	TTGCTGCCCGCTGCCCAGGACGCGGGGTGGGGGACAGGAGCCAGAGTGGT	NM_144489.2
ILMN_1755588	0.189427	0.000705	ANKRD47	3.99253	-0.35242	1.93521	38348259	ANKRD47	ATGTGTGCCAGTGAGTATGGGCGCCTGGACACCGTGCGGCTGCTGCTCAC	NM_198471.1
ILMN_1690114	0.189427	0.000711	PTPLAD2	-3.98914	-0.35921	-1.26297	58219057	PTPLAD2	GAGACAGCCTGGGTGACAGAGTGAGACTCTATCTCAAAAGAGAAGACCCT	NM_001010915.1
ILMN_2214790	0.189427	0.000716	LAMB1	-3.98608	-0.36534	-1.00466	4504950	LAMB1	AGCTCAAGAATTAGCAAGACTGGAAGGAGAAGTCCGTTCACTCCTAAAGG	NM_002291.1
ILMN_1655930	0.191926	0.000732	ELL2	3.97668	-0.38418	0.785833	142364661	ELL2	GCTGCTACTCCTAGTAGGCCAAACGCTCAGGTTAAACAACTGACGAGTGT	NM_012081.4
ILMN_1726164	0.193997	0.000746	NEDD9	3.96832	-0.40093	1.05496	33667045	NEDD9	TATCAGGTGCCACCATCAGTGCAGAGAAGCATTGGGGGAACCAGTGGGCC	NM_006403.2
ILMN_2395496	0.194422	0.000755	KLK7	-3.96363	-0.41032	-1.35653	21327703	KLK7	TTGGCCAGCGTGGTCTTGAACGCCTGACCTCAGATGATCCACCCACCTTG	NM_005046.2
ILMN_1771728	0.196206	0.000768	PXMP4	3.95602	-0.42558	1.54958	115511033	PXMP4	AATTAGCCGGGTTCCATCACCTGTGGTTCCAGCTGAGGTGGGAGGATCAC	NM_183397.2
ILMN_1759549	0.196985	0.000779	SRGAP2	3.95016	-0.43733	1.55103	112363099	SRGAP2	AGCAGCCTGTAAACTGGAAACACTGGTCTCAGCCAACCTCCTCAGGGCGC	NM_015326.2
ILMN_1796018	0.196985	0.000789	NFATC4	3.94465	-0.44838	1.17902	37595561	NFATC4	TCAGCCCCCTGCCAGAGTCACTGCCCCATAATCACCATGTCAGAAGGGAC	NM_004554.3
ILMN_2395373	0.196985	0.000794	GABBR1	-3.9418	-0.45409	-1.0051	11497615	GABBR1	GGGGAAGGATCTCCCCGAATCTCAATAAACCAGTGAACAGTGTGACTCGG	NM_021905.1
ILMN_1762802	0.196985	0.000798	CNIH2	3.93976	-0.45816	1.11522	32698937	CNIH2	TGCTCACCCTGGTGCTGTGCGCCTCCCTCATCTTCTTTGTCATCTGGCAC	NM_182553.1
ILMN_1651499	0.202725	0.000828	ERGIC1	-3.92396	-0.48984	-1.00591	24308198	ERGIC1	TGTAGTCACAGCTACTCGGGAGGCCGAGGTGGGAGGGTCTTCTGAGCCCA	NM_020462.1
ILMN_3247681	0.205528	0.00086	C2orf68	-3.90797	-0.52188	-1.61424	196259826	C2orf68	TGTCCCTGAGGAATCAGATGGTCATACAGCCATAGGCACCCACCCGAAAT	NM_001013649.3
ILMN_1654210	0.205528	0.000861	CD1C	-3.90748	-0.52286	-1.96904	110618226	CD1C	CTCTTCCCCCTGACTCCCCCATTGTGTTAAGAACCCAGCAACCCAGGAGC	NM_001765.2
ILMN_2243516	0.205528	0.000863	C11orf63	-3.90662	-0.52457	-1.07098	40217800	C11orf63	CTTAAAGAATTACGTCTGGTGGCACGTTGGCTCATGCCTGTAATCCCAGC	NM_199124.1
ILMN_3236804	0.205528	0.000871	SNORD126	3.9025	-0.53284	1.70671	154800506	SNORD126	GTCCGTGTTTCAGCTGATCAGCCTGATTAAACACATGCTCTGAGCAGACT	NR_003693.1
ILMN_2233050	0.205528	0.000875	PLA2G2D	-3.9007	-0.53643	-1.19288	21314652	PLA2G2D	CACTTGGACCTGGGAGGCAGAGGTTTCAGTGAGCCCAGATCGCGACACTG	NM_012400.2
ILMN_3309031	0.207777	0.000896	MIR27A	3.89052	-0.55684	0.86014	262205697	MIR27A	TTAGCTGCTTGTGAGCAGGGTCCACACCAAGTCGTGTTCACAGTGGCTAA	NR_029501.1
ILMN_2391150	0.207777	0.000901	FILIP1L	3.88832	-0.56125	0.760134	109659846	FILIP1L	ATGCAAGCTGTAGCCAGCCCTGTGAGACCTGCCAGCCCTTCAGCACCACT	NM_001042459.1
ILMN_1768534	0.207777	0.000906	BHLHB2	3.88595	-0.56599	0.624355	4503298	BHLHB2	GGTCCAGAGTACTTGTTTTCCCGATGTGTCCAGCCAGCTCCGCAGCAGCT	NM_003670.1
ILMN_2161577	0.209724	0.000921	CXCL6	-3.87866	-0.58061	-1.07935	52851409	CXCL6	TCCTGTGTGTCATGTTGGTTTTTGGTACTTGTATTGTCATTTGGAGAAAC	NM_002993.2
ILMN_1749915	0.21027	0.000934	C1orf63	-3.87295	-0.59205	-0.969936	46309848	C1orf63	TGCAGATATGAGAGATAGCACAGATGGACCAAAGGTTATGCACAGGTGGG	NM_020317.3
ILMN_2294411	0.21027	0.000943	CTDP1	3.86872	-0.60052	1.86547	67188444	CTDP1	GTTCCGCCACCCCAGCCGCAGATGTTTGGTGAAGAGCTGCCTGACGCTCA	NM_004715.3
ILMN_1691760	0.21027	0.000953	FAM45A	-3.86444	-0.60908	-0.624993	46358410	FAM45A	AACTTCCTACAGGGGCCAAAACCAGAGAAAGGCTTCCAGCAACTTCGATG	NM_207009.2
ILMN_2129927	0.21027	0.000956	EXT1	3.86303	-0.61192	1.63172	46370065	EXT1	CCCTGACCACTTTGCCCAGCGACAGAGCTGCATGAATACGTTTGCCAGCT	NM_000127.2
ILMN_2290732	0.21027	0.000971	ZNF626	-3.85636	-0.62527	-1.08268	115527109	ZNF626	CTTTGGTAGGCGACGTCGGGCAGATCATGAGGTCAGGAGTTCAAGACCAG	NM_001076675.1
ILMN_2404320	0.21027	0.000972	SNTN	-3.85584	-0.62632	-1.46379	122937509	SNTN	GCCTCCTGAGTAGCTGGGATTACAGGCGTGTGCCACGATGCCAGGCTAAT	NM_001080537.1
ILMN_1805192	0.21027	0.000974	ITPRIP	3.85501	-0.62798	0.595342	47271452	ITPRIP	GCCTCCAGAAGCCAAAACCATGCCTGGATCTCCCATAGCTTCTCCTTTGC	NM_033397.2
ILMN_1731862	0.212707	0.000992	ITIH5	3.84697	-0.64409	1.69222	153945779	ITIH5	GGGACACCAACCACATCGAGCGTCTCTGGAGCTACCTCACCACAAAGGAG	NM_030569.4
ILMN_1807298	0.215289	0.00101	NR4A3	3.83872	-0.66061	1.84141	27894356	NR4A3	GAAGTTGTCCGTACAGATAGTCTGAAAGGGAGGAGAGGTCGTCTGCCTTC	NM_173198.1
ILMN_1815023	0.215961	0.00102	PIM1	3.83431	-0.66944	1.88057	31543400	PIM1	GGTTCCCTTCCTATTCCAAGCTTCCATAGCTGCTGCCCTAGTTTTCTTTC	NM_002648.2
ILMN_1801616	0.218176	0.00104	EMP1	3.8269	-0.68429	0.8354	4503558	EMP1	GAGGGCAAGCCACCAAATTACCTAGGCTGAGGTTAGAGAGATTGGCCAGC	NM_001423.1
ILMN_1713686	0.219766	0.00106	IL34	-3.82076	-0.69658	-1.65171	22748956	IL34	ACAGCAGGGCTCAGCTTCCTGCCTTCCATAGCTGTCATGGCCTCACCTGG	NM_152456.1
ILMN_1716983	0.221761	0.00107	LILRA2	-3.81389	-0.71034	-1.84182	5803067	LILRA2	CAGGGACAGATCTGATGATCCCAGGAGGCTCTGGAGGACAATCTAGGACC	NM_006866.1
ILMN_1670554	0.223167	0.0011	WDR78	-3.80394	-0.73026	-0.735464	46276884	WDR78	GGGCACTTTGGATTTAAAGAGCAAAAAAGAGGACTGGCTTGCTGCTGGTC	NM_207014.1
ILMN_1699249	0.223167	0.0011	ZNF649	-3.80131	-0.73551	-1.52986	21362077	ZNF649	TGCATAAACCAGGAAATGGACTCTCACTGGACACTAGACCTGCCAACACC	NM_023074.2
ILMN_2050434	0.223167	0.0011	MGC16703	-3.8012	-0.73573	-1.05026	34147705	MGC16703	GTGGCAGACACCTGTGGTCCCAGCTATTCGGGAGGCTGAGGCAGGAGGAT	NM_145042.2
ILMN_2258749	0.223167	0.00111	BAIAP2	3.79933	-0.73948	1.56829	9257196	BAIAP2	TGGGAGCCCCTGGGAAGCTGCGGCGCTCCTTTATCTGATGTGGTTTAGTA	NM_017450.1
ILMN_1707727	0.223923	0.00112	ANGPTL4	3.79497	-0.74821	1.31266	21536397	ANGPTL4	GGGACACAAGCAGGCGCCAATGGTATCTGGGCGGAGCTCACAGAGTTCTT	NM_139314.1
ILMN_1698019	0.230336	0.00116	LGMN	3.78002	-0.77814	0.60352	56682963	LGMN	GGCTCGCTCCAGGACCTTCTTCACAAGATGACTTGCTCGCTGTTACCTGC	NM_001008530.1
ILMN_1761409	0.235496	0.0012	ZNF167	-3.76567	-0.80685	-1.34464	47716686	ZNF167	GTCATTCAAAAAGGCTGATTCATGCCTTCCTGCCTCTTGGCTATGGCCCT	NM_018651.2
ILMN_3244841	0.235496	0.00121	LOC100132111	3.76254	-0.81312	1.78888	209862783	LOC100132111	TGGCCCAGAACATCTCCCTGTGGATTCTCTCATCTGGCAACTGGATGCCT	NR_024237.1
ILMN_1797731	0.235496	0.00121	MS4A6A	-3.76199	-0.81423	-1.22236	23238233	MS4A6A	GCTATGAGTTTGTGCCTTTGCTGAGGACACTAGAACCTGGCTTGCCTCCC	NM_022349.2
ILMN_1803254	0.236438	0.00122	KIAA2010	3.75746	-0.82328	0.595232	31657116	KIAA2010	GCCTTTGAGCTCTCCAGCTTGGACCACACATTGCCCTTTTCTCAGGGAAG	NM_032560.3
ILMN_1689146	0.23875	0.00125	GABRP	-3.74718	-0.84384	-1.49661	7657105	GABRP	TTGCGGGTGAGCTGCCCTCTCCAAATCCAGCCAGAGATGCACATTCCTCG	NM_014211.1
ILMN_1736178	0.23875	0.00125	AEBP1	-3.74691	-0.84438	-1.08233	53692188	AEBP1	TCAGCACATGGAAGGCCCCTGGTATGGACACTGAAAGGAAGGGCTGGTCC	NM_001129.3
ILMN_1703123	0.23875	0.00126	AXUD1	3.74332	-0.85157	0.89248	17136074	AXUD1	GGCCTTGCCAGCCTGTGTGCTTGTGGGAACACCTTGTACCTGAGCTTACA	NM_033027.2
ILMN_2078547	0.23875	0.00127	HSPC268	-3.7422	-0.85381	-0.909894	37537547	HSPC268	TAAAAGTAGTACAAGCCTTAGCCAGGCACGGTGGCTCACGCCTGTAATCC	NM_197964.1
ILMN_2273224	0.241472	0.00129	SLC4A5	-3.73462	-0.86896	-1.46161	125987594	SLC4A5	GCTATAATCATGCCACTGCACTCCAGCCAGGGAGACAGCTGGAATCCATG	NM_133478.2
ILMN_1686319	0.241713	0.0013	USP37	-3.73148	-0.87524	-1.19529	32698743	USP37	CCTACACTTTGCCTAATTGAGCCACTACCAGGTTTTCTGGCAGCTGTGGC	NM_020935.1
ILMN_2093389	0.245749	0.00134	SNAPC1	-3.72	-0.89821	-0.981581	19923159	SNAPC1	GAAGCTGAGGCAGGAGAATGGTGTGAACCCAGTGAGCCGAGATCGTGCCA	NM_003082.2
ILMN_1794740	0.245749	0.00135	CD151	-3.71664	-0.90493	-0.870193	87159823	CD151	GTTCCCAGCAGGGGGAGAAACCCTTCACACCCCAGGCCCTTCAGGAACTG	NM_001039490.1
ILMN_1699665	0.245749	0.00135	CLIC6	-3.71603	-0.90614	-0.924003	27894377	CLIC6	GGGTCTAGCACATGTCACCCTTGTCCACGTTGTTTCACATCTGGTTAGGG	NM_053277.1
ILMN_2043828	0.245749	0.00137	UTP23	-3.70965	-0.9189	-1.03	14150117	UTP23	GTGGTCCCAATCCTCTTAGTTGTTTGAAGAAAAAGAAAAAGGCACCGGAC	NM_032334.1
ILMN_1732885	0.245749	0.00137	BTBD12	-3.70768	-0.92282	-1.5123	63252862	BTBD12	CTCCAGCCTCAGGAGCAGTGTGGAGGAAGATGAGGGCCAGGAAAGAAGGA	NM_032444.2
ILMN_1735573	0.245749	0.00138	DPH1	3.7062	-0.9258	1.93387	116686105	DPH1	CTCTGAGGGACATTTCCTGGCAGCAGCCCTACCCGATGGACTTCTACGCT	NM_001383.3
ILMN_2409720	0.245749	0.00138	SLA2	-3.70587	-0.92646	-1.44504	28416422	SLA2	GCTGGGATTACAGGTGTGAGCCACGGCACCCAGCCTAGCTCTCAGATCTC	NM_032214.2
ILMN_2259633	0.246592	0.0014	MLL5	3.69921	-0.93976	0.72735	91199541	MLL5	GGGGTTCGGGTGTCTCGTGTGTGAACATCACAGGTCTATTCTGGATAAGC	NM_182931.2
ILMN_1681721	0.246592	0.00141	OASL	3.69547	-0.94724	1.21432	38016933	OASL	CCAGGTCCCCCAGAGCCAATCTGCCCCCTCTCTATGCTCTTGAACTTCTA	NM_003733.2
ILMN_2127298	0.246592	0.00142	F2RL3	3.69501	-0.94815	1.33988	89353782	F2RL3	CATGTGGCGGCAGAGGCAGAGATGGGAGTGATGCGGACGGACACAAACTA	NM_003950.2
ILMN_2384770	0.246592	0.00142	EGFLAM	3.69415	-0.94986	1.90523	33469934	EGFLAM	GAGAGGGCTCGTGGGCTGTATCTCTCACTTCACCCTGTCCACCGATTACC	NM_182799.1
ILMN_2376458	0.249409	0.00144	CSF2RA	-3.68677	-0.96462	-1.3615	27437039	CSF2RA	CCGTGAGGCGGAGGTTGTAGTGAGCCAAGATCGCACCATTGCACACCAAC	NM_172249.1
ILMN_2350122	0.249673	0.00145	TRIM13	-3.68381	-0.97054	-0.667271	55953111	TRIM13	AAAAAAGGATCAGCTGGCTGGGCAGGGTGGCTCATGTCTATAATCTCAGC	NM_001007278.1
ILMN_2105573	0.251297	0.00147	CCL3L3	3.67854	-0.98107	1.93174	93589093	CCL3L3	CATGCGTGTGACCTCCACAGCTACCTCTTCTATGGACTGGTTATTGCCAA	NM_001001437.3
ILMN_1687501	0.252562	0.00149	MOXD1	-3.67391	-0.99031	-1.5527	118421086	MOXD1	CCGTGTGAGCCAGTCCAGGAGGGTGTAAGTTCTGAATGGTTCCTTGCTGA	NM_015529.2
ILMN_1745256	0.254042	0.00151	CXXC5	-3.66894	-1.00024	-1.02365	31542945	CXXC5	TCTGGCCTTGCTAATGGCAACAGAAGAAAGGGCTTCTTTGCGTGGTCCCC	NM_016463.5
ILMN_1764964	0.255008	0.00152	IFNGR2	-3.66375	-1.01059	-0.845683	47419933	IFNGR2	AAGACCTGGTCGTCGTCTTGACTTTGGCAAATGAGCCGGAGCCCCTTGGG	NM_005534.2
ILMN_1794392	0.255008	0.00153	DDX3X	3.6614	-1.01528	0.639018	87196350	DDX3X	CAGACCCGGCGTTGGCAGTGTAGCCATAACTTTCTGATGTTAGTAAAAAC	NM_001356.3
ILMN_3309428	0.255008	0.00154	SNORD114-17	3.65999	-1.0181	1.53378	115392015	SNORD114-17	GGCATTGGAGTTATGGACGATGAATGATATGTGTCTGAAACTCTGAGGTC	NR_003210.1
ILMN_1741027	0.256083	0.00156	GEFT	-3.65292	-1.03222	-1.04879	150417974	GEFT	TATTCCATTGCGGGCAGTGAGGGGAGTATATCGGCTTCTGCTGCCTCCGG	NM_182947.2
ILMN_2094776	0.256083	0.00157	CCNL1	3.65172	-1.03461	0.620414	49472825	CCNL1	GCTCAGGACATGGCAGGCACAGGCGCTGACTTTCTCTTCCTTTGAGCCTG	NM_020307.2
ILMN_1798636	0.256083	0.00158	RPL32	3.64902	-1.04	1.32204	55743129	RPL32	GTCTTCAGCTTCTTGGCCAACTTAGTTTGCCACAGAGATTGTTCTTTTGC	NM_001007074.1
ILMN_1728535	0.256083	0.00158	COPZ1	3.64685	-1.04434	1.24662	7706336	COPZ1	TCAGCTCCCCGACATGCATTTACTCTCTGCCGTGGGTCTGCAGTCGCTGC	NM_016057.1
ILMN_2181191	0.256083	0.00159	TPI1	-3.64626	-1.04551	-0.583072	52851446	TPI1	CTAAACGTCACCAAGGTGGCTTCTCCTTGGCTGAGAGATGGAAGGCGTGG	NM_000365.4
ILMN_1815012	0.256141	0.0016	EXOC7	-3.64381	-1.05039	-0.609328	62241045	EXOC7	TGGAGCCCAGGGGTGATGGAGACTTTTGATGGCTTTTGGCAGGGACAGAC	NM_001013839.1
ILMN_1776649	0.256467	0.00161	LRRK2	-3.64093	-1.05614	-0.778343	83722281	LRRK2	CACAGCTAGGAAGCCTTAAAAATGTCATGCTGGTATTGGGCTACAACCGG	NM_198578.2
ILMN_2378316	0.258243	0.00163	NUPL1	3.63524	-1.0675	1.95807	56788375	NUPL1	GTTACTACTGGACCCACTCCTTTCAGCACCATGCCAAACGCAGCAGCCGT	NM_014089.3
ILMN_2252621	0.258243	0.00164	ACOT7	3.63154	-1.07488	1.15114	75709207	ACOT7	CAAATATTTACCGCCGCGCGGAGAGTGAGGGCCCAAGTCCGCCCTGCTCC	NM_007274.3
ILMN_1736670	0.258243	0.00166	PPP1R3C	-3.62695	-1.08404	-1.31607	142352454	PPP1R3C	GCAAGAATCCAGTACCTTGCACATAGAAGTAGCAACCCATCCCTTGCCTA	NM_005398.4
ILMN_2178186	0.258243	0.00166	PIGW	-3.62691	-1.08412	-1.05865	75750491	PIGW	GCTGGGATTACAGGTGTGAGCCACCACACTGGGCCAATGCTTAATATTTT	NM_178517.3
ILMN_2100834	0.258243	0.00166	ZNF528	-3.62649	-1.08496	-2.06211	46410932	ZNF528	TTTAGATGAGACAGAGTTTCGCCCTTGTCACCCAGGCTGTAGTGCGGTGG	NM_032423.2
ILMN_1787511	0.26273	0.0017	THUMPD2	-3.61591	-1.10605	-0.693737	142367052	THUMPD2	CCAAGTAACCAAATTCCCCCAAAGACAGGAGGTGTGGCTGATGGGTACAC	NM_025264.3
ILMN_2393456	0.26273	0.00171	DDO	3.61459	-1.10869	1.3262	40217826	DDO	CGAGTGTGTCCATGCCCTCAGGACCCCCATTCCCAAGTCAAACCTGTAGA	NM_004032.2
ILMN_1803560	0.267158	0.00175	LAT2	-3.60514	-1.12752	-2.10863	14702187	LAT2	CTAGAGAAGTAGTGACCAGAACAGGGCAGAGTAGGTCCCCTCCATGGCCC	NM_022040.2
ILMN_1699684	0.267158	0.00176	PBLD	-3.60296	-1.13188	-1.05219	74316007	PBLD	GCATGGGCCATTAAAAATAGCAAACTGAAAACAGTTCATGTGTGGGGGGC	NM_022129.3
ILMN_2052135	0.269431	0.00178	LOH3CR2A	3.5971	-1.14354	1.72546	7106370	LOH3CR2A	GCAATAGTGACATGAGCACTTGACTCGCTGGGTTATCAGGCTTTGGCTCC	NM_013343.1
ILMN_1790918	0.273748	0.00182	ZNF236	3.58808	-1.16153	1.60564	10092585	ZNF236	AGCTGTCCACACGGGCTGGCGACACACTTACCGCATCAATCTGTGTTCAG	NM_007345.1
ILMN_2114422	0.27528	0.00184	NOD1	-3.58349	-1.17067	-1.78351	5174616	NOD1	AAGTCTCTTCCTGCCTCCCAAGCAGCTGAAGGGTGACTAAACGGGCGCCA	NM_006092.1
ILMN_2092933	0.275464	0.00185	ADAMTS4	3.58041	-1.17681	0.950908	41327755	ADAMTS4	GGCGTGAGCCACCGTGCCTGGCCACGCCCAACTAATTTTTGTATTTTTAG	NM_005099.3
ILMN_1815578	0.275464	0.00186	ZNF223	-3.57885	-1.17992	-1.17973	142368963	ZNF223	TGACCTATGGTAGTGCTACTGCACTCCAGCCAGGGCAACAGAGTGAGACC	NM_013361.3
ILMN_1655405	0.275668	0.00188	SCARF2	-3.57399	-1.18958	-1.19347	33598938	SCARF2	GCGACTCTAGTGGCCTGAGGAGATGTATTTATAGGCCCCCAGCAGGGCTG	NM_153334.3
ILMN_2159384	0.275668	0.00189	SBDSP	3.57228	-1.19299	1.31136	38348442	SBDSP	GCTACAGAAACAAGGTCGTCGGCTGGCGGAGCGGCTTGGAAAAAGACCTT	NR_001588.1
ILMN_1779399	0.275668	0.00189	SNRPA	-3.57081	-1.19592	-1.28138	39725715	SNRPA	GCCTTCGTGGAGTTTGACAATGAGGTACAGGCAGGGGCAGCTCGCGATGC	NM_004596.3
ILMN_3234984	0.275668	0.0019	SNORD105	3.56994	-1.19766	1.1761	161087001	SNORD105	GCCTCTGAGCTGCTGTGATTTCTGGCTTCAAAGTAAACGCTCTGAAGAAG	NR_004381.1
ILMN_1691916	0.27969	0.00194	KIAA1919	-3.56091	-1.21563	-0.772819	24158475	KIAA1919	GCAGTGCCCATGTGAAGCACTTGCCAGAAACCAGGACAAAAGGGACTAAC	NM_153369.1
ILMN_2335072	0.27969	0.00196	TAF1C	-3.55542	-1.22657	-1.02435	21536366	TAF1C	CAGGAGTGCTGGCTCCTCGTGTTTGGTGAGGGTGGAGTGAGGCCCCTGCA	NM_139353.1
ILMN_3300358	0.27969	0.00196	ZNF84	-3.5548	-1.22779	-1.10688	188497652	ZNF84	GCAGTGAGTGGCTGTTTTCTGCCACATGGAGAAACATGGTCTGCAGTGAG	NM_003428.4
ILMN_1709247	0.27969	0.00198	PPP2R1B	3.55088	-1.23561	1.29104	124269712	PPP2R1B	GAATAGTCTCACTGTCCCCCGTTTGCCTCCACGAGCCTGCTGTTTCCAGG	NM_002716.4
ILMN_1657619	0.27969	0.002	DNAJB14	-3.54768	-1.24195	-0.544734	72534739	DNAJB14	ATGCAGCAAAAGTATACCGTGATGATCGACTCCGAAGGAAGGCAGATGCC	NM_001031723.1
ILMN_1729611	0.27969	0.002	REEP4	-3.54667	-1.24397	-1.40603	20149694	REEP4	TTTATTGCCTTGCTCTGCCCTCTCCCTTCCCCGGTTGTGGGACAAGAGCC	NM_025232.2
ILMN_1714445	0.27969	0.002	SLC6A9	-3.54663	-1.24405	-1.49632	67782316	SLC6A9	GCAGTGACAGCCCCGGCCAAGCCACCTCTAATCCTCTGTAGCAATAACGG	NM_001024845.1
ILMN_1658636	0.27969	0.002	MRE11A	-3.54609	-1.24513	-0.845981	56550106	MRE11A	GCCACAAGGTGGTGCTTCTGCCATTAGACGCAGTTAGGAGGATGCAACTG	NM_005590.3
ILMN_1677824	0.27969	0.00201	RAB4A	3.545	-1.2473	0.99962	19923259	RAB4A	CTGGAGTACCTGCTCTGTTTTTGGCTGTGAGACTAGCACTAAGGATTCTG	NM_004578.2
ILMN_2276952	0.279754	0.00202	TSC22D3	3.54287	-1.25154	0.942403	62865622	TSC22D3	CAGAGCTTCCTAGCAGCCCGAGCCATGAACACCGAAATGTATCAGACCCC	NM_004089.3
ILMN_2318568	0.282851	0.00206	HCFC1R1	-3.53447	-1.26824	-0.715681	50952467	HCFC1R1	GGAAGGGAGGCATCCCACCCCCAAGAAGAACTGAATAAAGATTGCTGAGC	NM_001002018.1
ILMN_2305112	0.282851	0.00206	CTH	3.5341	-1.26898	1.96059	34328938	CTH	CACACTGATTCGACTTTCTGTGGGCTTAGAGGATGAGGAAGACCTACTGG	NM_153742.3
ILMN_1675413	0.285429	0.0021	ENPP7	3.52648	-1.28413	1.72748	45545420	ENPP7	GACTGCTGGGGACCGTGATTCTTCTGTCTGAGGTCGCATAACGCCCCATG	NM_178543.3
ILMN_2215211	0.285429	0.0021	ZNF514	-3.52609	-1.28491	-1.11121	14249455	ZNF514	AGCACATGTTACCTTTCTTTGTGAGGCAATGGAGTGGTCTAGGATTGAGC	NM_032788.1
ILMN_3237839	0.285429	0.00211	ZNF674	-3.52421	-1.28864	-1.07856	89994741	ZNF674	CGTGCCACTGCACTCCAGCCTGGGCATTATAGCCAGACCTTGTCAAATAA	NM_001039891.1
ILMN_1685445	0.288803	0.00214	NOTCH2NL	-3.51717	-1.30263	-0.623599	131889436	NOTCH2NL	GAGGAGGGGATCCTCTGTTAATCAGTGAGCACTTTTTGATGAGCTGATAG	NM_203458.3
ILMN_2113738	0.288803	0.00215	C8orf45	-3.51521	-1.30652	-1.04918	40255171	C8orf45	GTCCGAGAGGGCAGATTGCCTGAGGTCAGGAGTTCAAGACCAGCCTGGGC	NM_173518.2
ILMN_1758816	0.290209	0.00217	UGT8	-3.51116	-1.31457	-1.19766	40254470	UGT8	TGGAGCCCATCACCTACGTGCCGCTGTCCATCAGATCTCCTTTTGTCAGT	NM_003360.2
ILMN_1666361	0.291511	0.00219	SLC23A2	3.50728	-1.32227	2.18216	44680146	SLC23A2	TGCGGCGCCGAGGCGCGGCGGCAGGACGGGAACCACGCGAGCTGCAGCCA	NM_005116.5
ILMN_1730906	0.292151	0.00221	FILIP1L	3.5044	-1.328	1.21251	109659844	FILIP1L	GCGATATTCAGAGTCTCCCCAGACCGGCAGTCATCATGGCAGTTTCAGCG	NM_182909.2
ILMN_1663160	0.295015	0.00224	ZNF337	-3.49827	-1.34018	-1.65933	34147336	ZNF337	TCAGGTGCCCTTATGAAAAGGCTTGATAGAGGGAGTTTGTCCTGTGGCCC	NM_015655.2
ILMN_2078389	0.295124	0.00225	SLC4A2	3.49618	-1.34433	1.17248	21361550	SLC4A2	CATGCCGCCCAAACACCACCCAGATGTCACTTACGTCAAGAAGGTCCGGA	NM_003040.2
ILMN_2394438	0.295459	0.00226	FAM177A1	-3.49378	-1.3491	-1.01415	118498370	FAM177A1	CTCCAGCCTGGGCGACAGAGTGAGACTCCATCTTGGGGGGAAAAAAGTAT	NM_173607.3
ILMN_2276758	0.296922	0.00229	POFUT1	-3.48974	-1.35711	-0.914753	27436888	POFUT1	AATAATAGCCAGGCGTGGTGGCACATGCCTGTATTCCCAGCTGCTTGGGA	NM_015352.1
ILMN_1761941	0.300438	0.00232	C4orf18	-3.48277	-1.37095	-0.527488	144445990	C4orf18	AGATGTGTTTTCAGAGCTAGGTACAGAGGAATGTTTGCTACCTTTAGCGG	NM_016613.5
ILMN_1653871	0.302022	0.00235	NAMPT	3.47734	-1.38172	0.568718	111161293	NAMPT	CGTCTTCAAGGACCCAGTTGCTGATCCCAACAAAAGGTCCAAAAAGGGCC	NM_005746.2
ILMN_2362832	0.302022	0.00236	STAG3L1	-3.4757	-1.38498	-1.37583	50726988	STAG3L1	TGGCCAGGATGGTCTTGATCTCTTGACCTTGTGATCCACCTGCCTCATCA	NM_001002840.1
ILMN_1798581	0.302022	0.00237	MCM8	-3.47348	-1.38937	-1.18996	33469925	MCM8	CAGTGAGCCACAATCACACCAATCACTGCACTCCAGCCTGGGCAATAAAG	NM_032485.4
ILMN_1690209	0.302022	0.00238	C1orf186	-3.47145	-1.3934	-1.23952	56090508	C1orf186	AGGCTTGGCTGGGAAAACAGGCCAATGCCCCGGCAAGAAAGGTTGAGATC	NM_001007544.1
ILMN_1748889	0.302022	0.0024	PCDHGA7	3.46922	-1.39783	1.42673	14196475	PCDHGA7	CTGGGCAGCCTTGAGCCCTCCGACGGTCCTTACAACTATGACCTCACGTT	NM_018920.2
ILMN_1679428	0.302022	0.0024	CHIC2	-3.46899	-1.39827	-1.51396	29337284	CHIC2	CCAAGTATGTTGTCTTTCCAATGGTGCCTTGCTTGGTGCTCTCCTGGTGG	NM_012110.2
ILMN_1685781	0.302022	0.00241	C14orf142	-3.46742	-1.4014	-0.782087	110227845	C14orf142	GGAGAGTCCTTGAAAGAGACCCAAGGAAACCCTGAATTCATACCCACGTC	NM_032490.4
ILMN_1667288	0.30263	0.00242	SNORD73A	3.46471	-1.40676	0.980374	22546027	SNORD73A	AGTGATGAAAAAAGTTTCGGTCCCAGATGATGGCCAGTGATAACAACATT	NR_000007.1
ILMN_2372974	0.304094	0.00244	SIRPA	3.4608	-1.41451	1.22607	91105786	SIRPA	ATCTGGGAGCCACAGTGACCCAGCCACCTGGCTCAGGCTAGTTCCAAATT	NM_080792.2
ILMN_1815238	0.305112	0.00246	MAP2K3	3.45754	-1.42098	1.45592	117306181	MAP2K3	CCCCCGGAACCTGGACTCCCGGACCTTCATCACCATTGGAGACAGAAACT	NM_002756.3
ILMN_1725597	0.307129	0.00249	FXYD4	-3.45288	-1.43021	-1.23206	50659101	FXYD4	CCTGGGAGGCCTTATCCTCAAGGAAGGACTTCTCTCCAAGGGCAGGCTGT	NM_173160.2
ILMN_2384188	0.309648	0.00253	NFATC1	3.4454	-1.44505	0.849114	27502387	NFATC1	GAAAGGAGAGACGGACATCGGGAGGAAGAACACACGGGTACGGCTGGTGT	NM_172388.1
ILMN_2161286	0.309648	0.00254	FAM40B	-3.44473	-1.44637	-1.08988	55742704	FAM40B	CTTCCAATTTGAGAACCCATGTATGGGTTGCAGTGAGCCGAGATCGTGCC	NM_020704.1
ILMN_2114720	0.309648	0.00254	SLPI	-3.44396	-1.4479	-1.81596	15834622	SLPI	GGATCCTGTTGACACCCCAAACCCAACAAGGAGGAAGCCTGGGAAGTGCC	NM_003064.2
ILMN_1760575	0.309658	0.00255	PTP4A1	3.44216	-1.45146	0.675456	62865860	PTP4A1	CTTGGGTTTGGATACCCTTAGTGGGATGATGTAAATAGAGGCTAGCTACC	NM_003463.3
ILMN_1661674	0.313835	0.0026	VCL	3.43366	-1.4683	1.08487	50593530	VCL	CCCCCTGACATGGAAGACGATTACGAACCTGAGCTGCTGTTAATGCCATC	NM_014000.2
ILMN_1682232	0.313835	0.00261	MIER1	-3.43283	-1.46994	-1.44596	118130818	MIER1	TTGCACTACTTTTTCAGTGGTTCTTGGTCCCCTTTACCACATCTTGGGTG	NM_020948.2
ILMN_1797753	0.315826	0.00264	ARHGAP28	3.42723	-1.48103	1.43421	59710110	ARHGAP28	CGGAAGGAGTCATACGGGTCCATGCTCCACTTCTCTCCAAGGTGTCCATG	NM_030672.2
ILMN_1659936	0.315826	0.00265	PPP1R15A	3.42592	-1.48361	0.706594	9790902	PPP1R15A	CCCTGGACCTCAGTGGGAGGCGTGGCTGAGACCAACTGGTTTGCCTATAA	NM_014330.2
ILMN_1717793	0.315826	0.00266	C19orf33	-3.42482	-1.48579	-1.63104	41281602	C19orf33	TCCAGCGATTCGGACACGGATGTGAAGTCCCACGCTGCTGGCTCCAAGCA	NM_033520.1
ILMN_1708529	0.317219	0.00268	PAPPA2	-3.42118	-1.493	-1.28132	116174737	PAPPA2	AAGGAGACAGTGCCATCCATGGAAACGGGAGACCTCTGTGCCGACACCGC	NM_020318.2
ILMN_1738207	0.319981	0.00272	CISH	3.41476	-1.50569	1.55759	21614506	CISH	CAGAGCCTGTGTCTCACCCCCTCACAGGACAGAGCTGTATCTGCATAGAG	NM_145071.1
ILMN_1738983	0.319981	0.00272	SIRT5	-3.41397	-1.50727	-1.3476	13787214	SIRT5	GGTTGAACTTTACCCTAGGTCAGGGGTCAGCAAACTACTGCCTGTGGGCC	NM_031244.1
ILMN_1698731	0.322536	0.00277	SEC31B	3.40738	-1.52029	1.71892	38149839	SEC31B	CAGGTGCCCCATGCTCTAGTGTCCTCCCAACCACTGGCATCTTGACTCCT	NM_015490.3
ILMN_2368434	0.322536	0.00277	CUX1	3.40709	-1.52087	0.780426	31652237	CUX1	GGCCAGGCTGACTATGAAGAGGTGAAGAAAGAGCTGAACATTCTGAAGTC	NM_181500.1
ILMN_1794921	0.325346	0.0028	MS4A10	3.40162	-1.53168	1.88086	141802757	MS4A10	GGCTAGCTCTGCCAATCACTTACTGTGCGGGTTTGACTCAGTCCCTTCCC	NM_206893.2
ILMN_1729495	0.325346	0.00282	TRIM41	-3.39925	-1.53637	-0.868583	42516573	TRIM41	CTCCCAGCCCCTTTCCATGCCTTTCACTCCATTTGGCAAGCTCTGAGGGG	NM_201627.1
ILMN_1713505	0.325346	0.00283	NPC1	3.39675	-1.5413	0.770223	133930789	NPC1	CTTTGGCAAGCAGGAGGTGACACTAGATGGCTGTGAATGTGATCCGCTCA	NM_000271.3
ILMN_1742330	0.325346	0.00284	PLXNB1	-3.39653	-1.54173	-0.789419	41152087	PLXNB1	AGAGTTGAACGCCTCTCCTAGGCCACTACAAACTGACCCCTCAGCAGGGC	NM_002673.3
ILMN_2296803	0.325566	0.00285	CAPN3	3.39456	-1.54564	1.15567	47078248	CAPN3	GCAGTTGGAGGAACTGCCTGCAGCCTTGAGGAAAATGTCTAGTCACAAGG	NM_212467.1
ILMN_1787378	0.326287	0.00287	ADD3	3.39192	-1.55085	0.471529	62912451	ADD3	GATGACGCTTCATCTGTTTCACAAATTCAGTCTCAAACTCAGTCACCGCA	NM_016824.3
ILMN_2249473	0.328646	0.0029	SPTLC1	-3.38713	-1.5603	-0.971761	30474870	SPTLC1	GATACCTGTAATCCCAGCTACGTGGGAGGCTGAGGTGGGAGAATTGCTTC	NM_178324.1
ILMN_1811433	0.329434	0.00292	RPL8	3.38443	-1.56564	1.7202	15431305	RPL8	ATGGGCAGTATCCGCCGCCATCCTCTTCCGTGAGGCGCGCTGAGACCCGG	NM_033301.1
ILMN_1764596	0.329936	0.00293	MPST	3.38211	-1.57022	1.27779	61835203	MPST	GGCATTGAACCTGGCCACATCCCAGGTACCGTGAACATCCCCTTCACAGA	NM_001013436.1
ILMN_1772506	0.333462	0.00298	ATP5I	-3.37586	-1.58256	-1.24991	51479154	ATP5I	AGGCTTTGCTGGCTTGTGCGGCATCCTGCTCCGTCTGCAGGTTGTGCTTC	NM_007100.2
ILMN_1724877	0.335084	0.00301	PARD6G	3.37046	-1.59322	1.93884	115495001	PARD6G	TTCTTGCTGTGCTCTCTGCTGACTTGCAGGCGAGGCCGACTGTGCTGATG	NM_032510.3
ILMN_3240316	0.335084	0.00301	TMSL3	-3.37022	-1.5937	-0.681018	72255572	TMSL3	TCTGTCTGGCTGGCAGGGAAGGAAAGAACTTGCATGTTGGTGAAGGAAGA	NM_183049.2
ILMN_2304624	0.335084	0.00302	EIF4H	3.36871	-1.59667	0.760053	11559922	EIF4H	GCACCCAGCGGAATGTGCTTAGTATTTGGTCACCAGCCGTCATCCTGGGC	NM_022170.1
ILMN_1718990	0.335084	0.00304	NFRKB	3.3672	-1.59965	2.15947	23346419	NFRKB	CCCTGCATCCCATCTCCAACAGGGAACAGCTTCTGGCTCCTCCAAAGCAG	NM_006165.2
ILMN_1661161	0.336254	0.00307	SIAH1	3.36262	-1.6087	1.22621	63148617	SIAH1	GTTGGCGACGGAGCGCGTTGGTGCCAGGACCGGGGTCCGAGGCGCGCTCT	NM_003031.3
ILMN_1728360	0.336254	0.00308	MED29	-3.36122	-1.61145	-0.888891	52840094	MED29	ACTCGGAGGCTGAGAGGTGGGAGGATGCCTTGAGCTTGAGAGGTTGAAGC	NM_017592.1
ILMN_1672080	0.336254	0.00308	NR2F6	-3.36081	-1.61226	-0.877915	46411186	NR2F6	CCCCTAGCATGAACTTGTGGGATGGTGGGGTTGGCTTCCCTGGCATGATG	NM_005234.3
ILMN_2376205	0.336254	0.00309	LTB	-3.35923	-1.61537	-1.49866	4505034	LTB	CCCGGACGCCCAGGACCCCATGGCAGTGGGAAAAATGTAGGAGACTGTTT	NM_002341.1
ILMN_3229324	0.33868	0.00315	SGK1	3.35096	-1.63169	0.890649	163644253	SGK1	CGGACGCTGTTCTAAAAAAGGTCTCCTGCAGATCTGTCTGGGCTGTGATG	NM_005627.3
ILMN_1659122	0.33868	0.00315	KLF10	3.35075	-1.6321	1.79103	5032176	KLF10	GGCCAAGCAGCCAACCATGCTCAACTTCGGTGCCTCTCTCCAGCAGACTG	NM_005655.1
ILMN_1806733	0.33868	0.00317	COL18A1	-3.3483	-1.63693	-0.527131	110611232	COL18A1	AGTCATTCGTTCTGTGGAGGGACAAGTGGACTCAGGGCAGCGCCAGGCTG	NM_130445.2
ILMN_1731912	0.33868	0.00318	FLJ90231	3.34767	-1.63817	1.22538	113423184	FLJ90231	GGCCCTGCTGAGAAGAGGGATTGTGGAGCTTCTCTTGACCTCTGATGGTG	XM_001131501.1
ILMN_1766085	0.33868	0.00318	REL	3.34663	-1.64023	0.955918	56550118	REL	GGATCTGACTTCAGTTGTGCAGATAACAGCATGATAAATGAGTCGGGACC	NM_002908.2
ILMN_1756696	0.33868	0.00318	USF2	-3.3466	-1.64028	-0.535437	46877104	USF2	CTCTGGAGGTACTGAGACAGGGTGCTGATGGGAAGGAGGGGAGCCTTTGG	NM_207291.1
ILMN_2340908	0.340957	0.00322	SCML1	3.34213	-1.64909	1.1493	82830431	SCML1	ACCCGATCCTCAGCCGCACTCCGAGTCCAGTGCATCCCTCAGATTTCTCT	NM_001037540.1
ILMN_1652790	0.342599	0.00325	CLK1	-3.33803	-1.65717	-0.636554	67551260	CLK1	GTCACCGAAGGAAAAGAACCAGGAGTGTAGAGGATGATGAGGAGGGTCAC	NM_004071.2
ILMN_1718565	0.342599	0.00325	CDKN1C	3.33693	-1.65933	1.13122	4557440	CDKN1C	AAGAGGCTGCGGTGAGCCAATTTAGAGCCCAAAGAGCCCCGAGGGAACCT	NM_000076.1
ILMN_2281529	0.342738	0.00328	STAP2	-3.33393	-1.66524	-1.37804	62243733	STAP2	AAAGTGCTGGGATTACCGGCGTGAGCCACCACACCTGGCCTCATCTGTCT	NM_017720.2
ILMN_2200880	0.342738	0.00334	ZNF367	3.32558	-1.68168	1.2945	46195795	ZNF367	ACTGGGGCGCCACTCCGACAGTAGCTTGGACACTGACTCTTCCACTGTAC	NM_153695.2
ILMN_2147993	0.342738	0.00336	ZNF23	-3.3238	-1.68518	-0.777221	23308736	ZNF23	CAGTTATGGAGGACTTGTATGGAGAAATTTAAGTCTTCACTGAGGGCCAC	NM_145911.1
ILMN_1769129	0.342738	0.00337	CCL19	-3.3214	-1.68991	-2.53085	22165424	CCL19	GGACCTCAGCCAAGATGAAGCGCCGCAGCAGTTAACCTATGACCGTGCAG	NM_006274.2
ILMN_2167805	0.342738	0.00338	LUM	-3.32079	-1.69109	-0.896443	61742794	LUM	CTGTCAAATGATGTGCAAAACCTTTTACTGGTTGCATGGAAATCAGCCAA	NM_002345.3
ILMN_1796855	0.342738	0.00339	TIAL1	-3.31933	-1.69398	-0.72102	77695911	TIAL1	GGCAAATGGGTGGCAAGTACCGCCTTATGGAGTATACGGGCAACCATGGA	NM_001033925.1
ILMN_1791728	0.342738	0.0034	SLC25A25	3.31831	-1.69598	1.91588	56699400	SLC25A25	CTGCCCTTGCTTAACAATGCCGGCCAACTGGCGACCTCACGGTTGCACTT	NM_052901.2
ILMN_1773696	0.342738	0.0034	RGMB	3.31756	-1.69745	1.57529	61676198	RGMB	AGGTGACTGCCAACAGCCAGCCCAATGTCGAATCCAGAAATGCACCACGG	NM_173670.2
ILMN_2247226	0.342738	0.0034	BAIAP2	3.31745	-1.69767	1.84848	9257198	BAIAP2	GAGGAGGTTGTCCTGGAGAGGCCTGTAGGTCCATTCTTCACCCGTCCCTA	NM_017451.1
ILMN_1768101	0.342738	0.00341	HOXB6	-3.31714	-1.69828	-0.588281	85543350	HOXB6	TGTCGTCTCTCCCACCCCCTCCCCAAAGCCACTGGAAGGAGCACATACTA	NM_018952.4
ILMN_2158164	0.342738	0.00342	ZNF430	-3.31561	-1.70129	-0.81958	31982918	ZNF430	TTGAACCCGGGAGGCAGAGGTTGAAGTGAGCTGAGATCGCGCCATTGCAC	NM_025189.2
ILMN_1670816	0.342738	0.00343	MZF1	-3.3148	-1.70288	-0.542481	37622340	MZF1	GGATTCGAGGCGGGGAGCATGGGAAGAAGCGGCCAGGAGTATGACCTGAT	NM_198055.1
ILMN_3238183	0.342738	0.00343	BMS1P5	-3.3144	-1.70367	-0.951365	219689089	BMS1P5	TAAAGTCTAGCCAGGTGCAGTGGCTCACGCCTGTAATCCCAGACTTTGGG	NR_003611.2
ILMN_2240866	0.342738	0.00344	MASP1	-3.31301	-1.70641	-0.759288	73623025	MASP1	CCATGTGGCCTCAGGCTGACCAGATCAAAGTGGTTTCTAATCCATTCTAC	NM_001031849.1
ILMN_1674344	0.342738	0.00344	PARD6G	3.31236	-1.70769	1.26767	115495001	PARD6G	GGGCATGTCGTTCAGTGCCCCAGCAGTCAGAAGCAGTTTTTGTGGAACTA	NM_032510.3
ILMN_1810891	0.342738	0.00345	ZNF629	-3.31221	-1.70798	-0.918239	89040263	ZNF629	TGAAACTGCTATGGACATGGAGGTCAGATGGGAACTTGGAACTGGGCATG	XM_034819.6
ILMN_3250850	0.342738	0.00346	RFESD	-3.3103	-1.71174	-1.6887	197100549	RFESD	GGCAGATCTTGAAGTAAGGAAGCCAGACACAGCTGCTGCCCAGCCATGAG	NM_001131066.1
ILMN_1708881	0.342738	0.00347	RAB20	3.30891	-1.71447	0.929859	8923400	RAB20	GGGGTCTGACCAGGCAAGCTGTGATCTGAAAGGAGCAAGGAACAGCAAGG	NM_017817.1
ILMN_1677466	0.342738	0.00348	DUSP6	3.30817	-1.71592	1.84626	42764682	DUSP6	CTGACCTTGACCGAGACCCCAATAGTGCAACAGACTCGGATGGTAGTCCG	NM_001946.2
ILMN_1778064	0.343708	0.0035	FICD	3.30539	-1.72138	1.26058	42794619	FICD	GGCCTTTCATTCGCTTCATCGCCAAGTGTACTGAGACCACCCTGGACACC	NM_007076.2
ILMN_1806123	0.343708	0.00351	MRPL23	3.30404	-1.72404	1.41796	27436903	MRPL23	ATCAAGAAGCCGGACTACAAGGTCGCCTACGTGCAGCTGGCCCATGGACA	NM_021134.2
ILMN_1718621	0.350355	0.00359	TSPAN32	-3.29415	-1.74348	-2.1929	73765547	TSPAN32	GTCCTTGTCCCTGGTCCTGTGGTCCCTCCACCTTCAAACCAGCAATGGTG	NM_005705.4
ILMN_1656837	0.350355	0.00361	RBP1	-3.29242	-1.74688	-0.801866	8400726	RBP1	CAGTGAGCTGGGACGGAGACAAGCTCCAGTGTGTGCAGAAGGGTGAGAAG	NM_002899.2
ILMN_1782412	0.350355	0.00361	IRX2	-3.2914	-1.74888	-1.78088	142382390	IRX2	TCCAAGTGGACAGGACTCTGACATTCTCCCGGGGCTCACAACAGTATCTC	NM_033267.3
ILMN_3235912	0.35345	0.00366	C7orf38	-3.2861	-1.75928	-1.27375	62420889	C7orf38	CAGCAGTGGGAGACCGAGGTGGGCAGATCACTTGAGTTCAAGACCAGCCT	NM_145111.2
ILMN_1683263	0.35345	0.00367	TSPAN8	-3.28472	-1.762	-0.798403	21265107	TSPAN8	TTGAGATACTGGGTTTGGTGTTTTCTATGGTCCTGTATTGCCAGATCGGG	NM_004616.2
ILMN_1727855	0.356643	0.00373	PEMT	3.27802	-1.77514	1.4163	22538477	PEMT	GGTGGCAGGGCCTGACTGCTGCGGAGGCCTCGGCAATATTGATTTTAGAC	NM_148172.1
ILMN_1756308	0.356643	0.00373	NAE1	-3.27723	-1.7767	-0.817191	66363685	NAE1	TCCTCCATACATTTGACAGCTGTCTGGGCCCTTATGGAGCATACAGTGGA	NM_001018159.1
ILMN_3245310	0.356643	0.00374	CCDC94	3.27655	-1.77802	1.25474	142360381	CCDC94	TTGGCGTGACTGGAGGCCGGACAGACAAGCGCCAGCGTGCTCCAACACAT	NM_018074.4
ILMN_1775016	0.3584	0.00378	MPZL2	-3.27215	-1.78666	-0.955046	21536336	MPZL2	GGCTGTTAGGTGTTTCCCATATGAAATTAGAGGAGCTGGGTCAGGGAGAC	NM_144765.1
ILMN_1801077	0.3584	0.00379	PLIN2	3.2711	-1.78873	0.653993	34577058	PLIN2	ACCAAGGTGCAGAGATGGACAAGAGCAGCCAGGAGACCCAGCGATCTGAG	NM_001122.2
ILMN_1737945	0.3584	0.0038	ALG2	3.2702	-1.79049	1.14676	91807120	ALG2	GGCTCAAATGCCACTGCTGCAAAGCTTTCTTTGACCCTCTGGCCACCTCC	NM_033087.3
ILMN_2061435	0.359087	0.00382	MEG3	-3.26772	-1.79536	-0.69841	84872046	MEG3	CTAGGGGAGCTGTTGAGCCTTCAGTGTCTGCATGTGGGAAGTGGGCTCCT	NR_002766.1
ILMN_2192072	0.359087	0.00383	MMP7	-3.26658	-1.79759	-1.65884	75709180	MMP7	GCAACTCATGAACTTGGCCATTCTTTGGGTATGGGACATTCCTCTGATCC	NM_002423.3
ILMN_1778723	0.359606	0.00385	AMICA1	-3.26456	-1.80154	-1.68235	23397450	AMICA1	CTCTCCTGTGTGTGTCCTGGGCCACTCTACCAGTGATTTCAGACTCCCGC	NM_153206.1
ILMN_2335319	0.360591	0.00389	KCNG3	3.25962	-1.81124	0.684247	27436992	KCNG3	GCCCAGCAGGTTAATCTTCACACATCTCTGGGTTCTGAGAAAAGCCTGGA	NM_172344.1
ILMN_1815287	0.360591	0.00389	B3GALT3	3.25957	-1.81133	1.03406	15451878	B3GALT3	GACCCGGGGCGTTTGCAGCGGTGCCGAGGAAGAGGACGGGAACGGTGTTA	NM_033169.1
ILMN_1684554	0.360591	0.00389	COL16A1	-3.25923	-1.81199	-1.07073	100913219	COL16A1	CCATGCCGATGGAGCAGCAGTACCCACCCATGAAAACCATGAAGGGGCCT	NM_001856.3
ILMN_1748890	0.363982	0.00395	GPR176	-3.25289	-1.82441	-0.76788	6005771	GPR176	CTGTGGGGACAAGAGCTGGGCAGTTTTGAATGGGTCTTGAGGTGGGTACC	NM_007223.1
ILMN_2381537	0.363982	0.00397	CRCP	-3.25105	-1.82803	-0.844311	100913024	CRCP	GGAATCGCTTGAACCGGGGAGGCAGAGGTTGCAGTGAGCCAGATCGTGCA	NM_014478.4
ILMN_1733043	0.363982	0.00398	DLG2	3.24934	-1.83137	0.993215	4557526	DLG2	GCCCAGCTCTATCCCATTGCCATCTTCATAAAACCCAGGTCTCTGGAATC	NM_001364.1
ILMN_3247223	0.363982	0.00399	TPBG	-3.24877	-1.83248	-1.33089	34222307	TPBG	GCAGACGTTAGCAGGCTCTTCAAAATAACTCCATGGTGCACAGGAGCACC	NM_006670.3
ILMN_1660179	0.363982	0.00401	MATR3	-3.24664	-1.83666	-1.62459	62750352	MATR3	ATTGTGGGAGTCTCCGCGTCCCGCTCGCTGGGAGAGAGGTACCTCTCCTT	NM_018834.4
ILMN_2102580	0.363982	0.00401	UTP20	-3.24592	-1.83808	-0.952155	120587022	UTP20	GTGCTGGGATTACAGGTGTGAGCCACCCTGCTCAACCAGGTTTTATTATT	NM_014503.2
ILMN_2268026	0.363982	0.00402	C15orf44	3.24495	-1.83998	0.862582	13540585	C15orf44	TGAGAAGCTTGAATGACTGATGAGCATAGAGCACCCCTGCCTTCCTCAGG	NM_030800.1
ILMN_2374159	0.363982	0.00403	HERPUD1	3.24431	-1.84123	0.520997	58530858	HERPUD1	GCTGTAGCTGTTGGAGGCTTTGACAGGAATGGACTGGATCACCTGACTCC	NM_001010990.1
ILMN_2073307	0.364115	0.00404	IL10	-3.24281	-1.84416	-1.52838	24430216	IL10	GGAAGTTGCAGTGAGCTGATATCATGCCCCTGTACTCCAGCCTGGGTGAC	NM_000572.2
ILMN_1735014	0.367717	0.00409	KLF6	3.23718	-1.85517	1.29966	56550115	KLF6	CCCTTCCGAGCGGCGCCTAAGCCTTTGCCGTGAGCATGCACACTGAGAAT	NM_001300.4
ILMN_1659792	0.369937	0.00413	HOXD9	-3.23294	-1.86348	-0.766866	23397673	HOXD9	GGCCAAGTGCGCCCCAATTCCAAGAATGAAGGCAGAGCGACAACAGTGCG	NM_014213.2
ILMN_2387078	0.369937	0.00414	MPZL2	-3.2319	-1.8655	-0.794052	21536336	MPZL2	CCAGCATTACCGGAAAAAGCGATGGGCCGAAAGAGCTCATAAAGTGGTGG	NM_144765.1
ILMN_1662932	0.370289	0.00416	LCP1	-3.23016	-1.8689	-1.33859	7382490	LCP1	ATTGCTCTGGATCTGTTCCTTGGCAGTGGACTCAGAAAGCCAACATGTGG	NM_002298.2
ILMN_1652065	0.37101	0.00418	KCNMB1	-3.228	-1.87314	-1.49537	25777641	KCNMB1	CCTCTGTGCCTGAGTTCTCCCTGTTGTCTCAAAGCGGTACCCATCCTCCC	NM_004137.2
ILMN_1706505	0.371242	0.0042	COL5A1	-3.226	-1.87705	-0.908044	89276750	COL5A1	GTTCCAAGGTAAGCCTCGTAAAGGTCATCCCACCATCACCAAAGCCTCCG	NM_000093.3
ILMN_1725169	0.371242	0.00421	INTS12	-3.2251	-1.87881	-1.0437	21361850	INTS12	ACTACTTCAGAATCCAGCAGCTCTCCCTCAGCATCCCTTAAAGGCCCAAC	NM_020395.2
ILMN_2190126	0.371523	0.00423	TTC23L	3.22321	-1.88251	0.962122	116089275	TTC23L	GGAGGAACCACAACCAGGCCATCCAGTACTTGCAGCAGGCTCATTCTGTC	NM_144725.3
ILMN_2345824	0.371523	0.00424	PCDHGC3	-3.22216	-1.88456	-1.02437	14277674	PCDHGC3	CGCTGAGAGGAACTGCTTTTGAGTGAGATGGTCCCAGAGGCCTGGAGGAG	NM_002588.2
ILMN_2120022	0.373607	0.00428	ARL5B	3.21835	-1.89201	0.752793	59858805	ARL5B	AGTGAAAAGCAAGGGACCCACCTACATTACCTTCAGGAGACTGTTCTACC	NM_178815.3
ILMN_1802205	0.373607	0.0043	RHOB	3.21612	-1.89636	0.534422	42716309	RHOB	GCAGGTCATGCACACAGTTTTGATAAAGGGCAGTAACAAGTATTGGGGCC	NM_004040.2
ILMN_2150802	0.373607	0.0043	FLJ22795	-3.21583	-1.89693	-0.718665	13443001	FLJ22795	CACCTGTCAAATGTCACAGATCTGGGAGGGGACTTAAGACTTATCATGCC	NM_025084.1
ILMN_1786347	0.37651	0.00435	TNPO1	-3.21116	-1.90605	-0.671594	133904027	TNPO1	CAGTCTTGGAGACTATAAGGGAGCCTCTGCACCCAGGGAAAATGTTACCC	NM_153188.2
ILMN_2395474	0.378006	0.00439	REV1	-3.20683	-1.91451	-0.507826	84043966	REV1	GCCTGATGCTCTCTGATAGCTGTGCCATAAGTGCTTGTGAGGTATTTGCA	NM_001037872.1
ILMN_2354391	0.378006	0.0044	EGLN2	-3.20578	-1.91656	-0.630695	18141577	EGLN2	TGCCACTGCTTGGGCAGAGTAAAAGGTGCCAGGAGGAGCATGGGTGTGGA	NM_080732.1
ILMN_2322972	0.378006	0.00441	ZFYVE27	-3.20443	-1.91919	-1.81182	50557643	ZFYVE27	GAGGCAAGGGACCCATCCTAGGCCCGCTTTCTTGCCGAGCCAAGCAGCTT	NM_144588.4
ILMN_2335754	0.378006	0.00442	CD1E	-3.20428	-1.91949	-1.0187	110618235	CD1E	GGGCCAGCTTCATAAGCATGTGACCTGTGCAGACACATGGAATCGTATGC	NM_001042586.1
ILMN_1687391	0.378006	0.00443	C3orf35	3.2025	-1.92295	1.76764	153251876	C3orf35	ATCCCACCTGTCCCTCCCACTCCTGATCCCAGGCAACCACTGATCTGCTT	NM_178342.2
ILMN_2102422	0.378006	0.00444	ABCB8	3.2017	-1.92452	1.60991	9955964	ABCB8	AGAGGTGTACACAGCCGCCCGGGAAGCGAATGCTCACGAGTTCATCACCA	NM_007188.2
ILMN_1757732	0.378006	0.00445	OSGIN2	3.2005	-1.92685	1.49498	4757889	OSGIN2	CTCTCAGGCCCCACAACTTACTTCCTGCATTTTAACAAGATCCCCAAGGG	NM_004337.1
ILMN_1768491	0.381539	0.00451	TBC1D25	3.19518	-1.93724	1.42667	124299170	TBC1D25	GGGACCTCAGCACAGCCTTTGCCACTGCCTCCAAACCTTACCTGCAATTG	NM_002536.2
ILMN_1688573	0.384967	0.00456	CREB5	3.19001	-1.94732	0.746061	59938769	CREB5	GAGACCGAGGGAGGTACCAGAGTCTAGGAGGTACCTCTGGGTTGCAGAAG	NM_182898.2
ILMN_1769540	0.385216	0.00458	FLJ43276	-3.18809	-1.95108	-0.911639	153791900	FLJ43276	GTGAGATGAAAGAAGAGCCTACTAGTGAGAAGAAGTTGGAGGATGAAGGA	NR_003661.1
ILMN_2090949	0.385216	0.00459	NAG18	-3.18723	-1.95275	-0.913128	76677901	NAG18	AGGCTGCGGTGAGCCAAGATCATGCCACTGCACTCCAGCCTGGGCAAAAA	NR_002568.1
ILMN_1694111	0.386556	0.00464	PNKP	-3.18237	-1.96222	-0.937411	31543418	PNKP	AAGGCTTCTCTGCCATCCTGGAGATCCCGTTCCGGCTATGGGTGGAGCCG	NM_007254.2
ILMN_1662192	0.386556	0.00466	ZNF248	-3.18074	-1.96539	-0.654077	32698747	ZNF248	CCAGGTGGGCACAGAGAAGGGTGGAGAGAGAATCTGGGAAGAGAAATGGA	NM_021045.1
ILMN_1802628	0.386556	0.00468	PPAPDC2	-3.17895	-1.96888	-0.771612	66773039	PPAPDC2	CCCACAGCATCCTGAATACCGACTACCTCTTCACTTGCTAAAGCAGCTAA	NM_203453.2
ILMN_1679460	0.386556	0.00468	PPFIBP1	-3.17876	-1.96925	-0.530571	29294626	PPFIBP1	GGTTTTCACAAATTGAGGTGGAGGTGGGCGGTTCAGTATCTGCCACTGGA	NM_003622.2
ILMN_1777663	0.386556	0.0047	TOP2B	3.1771	-1.97249	0.514388	19913407	TOP2B	AGACTTCCCTACTGAGCCACCTTCTCTGCCACGAACCGGTCGGGCTAGGA	NM_001068.2
ILMN_1802804	0.386556	0.00471	L3MBTL	3.17646	-1.97372	1.07954	117938329	L3MBTL	TTAAGACGGCAGGAAGCAGGTGCCCTCCCCAGCGTCACTTCTGCTAAGGA	NM_032107.3
ILMN_1772055	0.386556	0.00473	VARS	3.17402	-1.97849	1.79177	113417851	VARS	TGCACCTGGGCCATGCACTCACCAACGCCATCCAGGACTCCCTGACTCGA	XM_001133527.1
ILMN_2219131	0.386556	0.00474	RPS15	3.17369	-1.97914	1.24523	71284430	RPS15	CAGTCTCGCGATAACTGCGCAGGCGCGGACCAAAGCGATCTCTTCTGAGG	NM_001018.3
ILMN_1702592	0.386556	0.00474	WDR73	-3.17365	-1.9792	-0.902223	116235475	WDR73	TGAGTGGGTCTCATGGGAACACAGGTGCACTTTCCCACACTTGTCCCCCC	NM_032856.2
ILMN_1674390	0.386556	0.00474	PRKAR1B	3.17339	-1.97971	1.16435	38257138	PRKAR1B	GGCCAAGGCCATCTCCAAGAACGTGCTCTTCGCTCACCTGGATGACAACG	NM_002735.1
ILMN_2088437	0.390549	0.00481	CX3CR1	-3.16666	-1.99281	-1.20002	68348719	CX3CR1	ATTGTCATTCCTGTATTCACCCGTCCAGACCTTGTTCACACTCTCACATG	NM_001337.3
ILMN_1801869	0.390549	0.00483	WDR75	-3.16536	-1.99534	-0.985536	29789282	WDR75	AGACTACAGCTGGATAGCTGCCCTTTAAGCCTTGGAGATGGGGAGGATCC	NM_032168.1
ILMN_1697550	0.390549	0.00483	ACYP2	3.16526	-1.99554	1.77724	148277041	ACYP2	CGCCAAGCAGTCCCATGTGTCCCCTCCCTCTCGCAGCCGCCGCAGTCGCT	NM_138448.3
ILMN_2120555	0.390792	0.00484	ADCY1	3.16378	-1.99841	1.44568	31083192	ADCY1	GCGCCTGCGTTCTTCTGGGTTTGGCTAGATAGGGTTGTGTCCCTCTATGG	NM_021116.1
ILMN_2278653	0.392644	0.00488	ZNF493	-3.1602	-2.00539	-0.690806	115511043	ZNF493	GGAAAAGATCCCTGGAATATGAAGGGACACAGTACGGTAGTCAAACCCCC	NM_001076678.1
ILMN_1661750	0.392644	0.0049	VIL1	3.1589	-2.00791	0.767338	6005943	VIL1	CCGAGGGTGTGGACCCCAGCAGGAAGGAGGAACACCTGTCCATTGAAGAT	NM_007127.1
ILMN_1695604	0.392644	0.00491	DCBLD1	-3.15812	-2.00943	-0.865347	27735142	DCBLD1	GGTGCTCCTTGTTGTCCTGGTGTTTGCTGGAATGGGGATCTTTGCAGCCT	NM_173674.1
ILMN_1680692	0.395138	0.00495	NUCKS1	-3.15415	-2.01715	-0.863242	56118309	NUCKS1	GGGTCTGAAGATGAAGCCCCTTCTGGGGAGGATTAAAAGTGATGATGGTC	NM_022731.2
ILMN_2070792	0.399708	0.00503	ACSM5	3.14727	-2.03053	1.24987	38505219	ACSM5	CACCCCAGGAAGGCCCCGTAGACCTCCGAAGACTCCACAAGAAACTAATG	NM_017888.2
ILMN_1756352	0.399708	0.00504	MAPBPIP	3.14674	-2.03156	0.696664	7661727	MAPBPIP	GGGCCGCCTACGACCGGAACGGGAACCAAGCGTTTAATGAAGACAATCTC	NM_014017.1
ILMN_1757660	0.404307	0.00511	CAPS	-3.14054	-2.0436	-0.508038	18104963	CAPS	CCAGGTGTGGAGCGAGGGGCACAGGGGCATCCTAACCTCAGAAACTGAAA	NM_080590.1
ILMN_2106449	0.405412	0.00515	PLEKHF2	3.13706	-2.05036	0.784688	31543413	PLEKHF2	GTGCGGATTTGTGACTTCTGCTATGACCTGCTTTCTGCTGGGGACATGGC	NM_024613.2
ILMN_2410038	0.405412	0.00515	FAM111A	-3.13663	-2.0512	-0.716331	38505208	FAM111A	GTGCCGGTAGTACAGATAACCCCTCATAAAGATGCTTATCTAACCTCCCC	NM_022074.2
ILMN_1759487	0.405412	0.00516	EGFLAM	3.13581	-2.05278	1.59512	33469936	EGFLAM	TCTCCCTGTTCTCTTTCATGCTGGCACCGGGCAGAGTGTGGGAACTACTG	NM_182801.1
ILMN_2406132	0.405701	0.00518	LILRB3	-3.13433	-2.05566	-0.815228	125661044	LILRB3	GCTATGACTGTGCCACTGCACTCCAGCCTGTGTGACAGAGCGAGACCTTG	NM_006864.2
ILMN_1765257	0.405757	0.0052	CINP	-3.1331	-2.05804	-1.65214	21327682	CINP	TGAGACGGCTGCGGACACTGGCTCCTTCCACGTCTCACCAGGCAGACAGT	NM_032630.2
ILMN_1782635	0.407033	0.00523	YARS2	-3.13055	-2.06299	-1.11444	94681056	YARS2	CCAGATGGTCCCCGAGGGTATCGAATGATAACAGAAGGCGGAGTCAGCAT	NM_001040436.1
ILMN_2225974	0.407033	0.00525	GCLM	-3.12812	-2.06771	-0.7283	53759142	GCLM	ATGTGAAATCTGCCCGGGCACACCTCATGCCTGTAATCCCAGCACTCTGG	NM_002061.2
ILMN_1695354	0.407033	0.00525	BMF	-3.1281	-2.06775	-1.2495	51558692	BMF	TCCCTGCTCTGGGAGCATTGCTAGCCTTCTACCCCATCCCTGGATCCACA	NM_033503.3
ILMN_1722492	0.407033	0.00527	DUSP19	-3.12708	-2.06973	-0.782243	31377625	DUSP19	CTGAATTAAAAAATCTGTTGGTGGCCGGGCGCAGTGGCTCATGCCTGTGG	NM_080876.2
ILMN_1670748	0.407077	0.00528	GALNT7	-3.12588	-2.07206	-0.601883	8393408	GALNT7	CCTTATTAACTAGGCATAGGCCTAAGAAAGGTGGCAATGAACTGTGCATG	NM_017423.1
ILMN_1795507	0.409177	0.00533	ABCA6	-3.12166	-2.08023	-1.58621	27436952	ABCA6	CAGAGATCAAGTGTGGAGCCTCCTGAGAGAGCGTAGAGCAGATCATGTGA	NM_080284.2
ILMN_2255142	0.409177	0.00534	TRIM34	-3.12132	-2.08089	-1.16667	51477686	TRIM34	ATTACAGGTGTGAGCCACTGCGCCCGTCCTGACTCATGCAACTTCTGCTT	NM_001003827.1
ILMN_1758719	0.410396	0.00538	NEDD9	3.11755	-2.0882	0.953219	33667045	NEDD9	CACCACAAGCCATCAGGTTCTTCATGGGGCAGGTGAAATACTTCTACCCC	NM_006403.2
ILMN_1779632	0.410396	0.00539	TMEM1	3.11655	-2.09014	1.30419	48928030	TMEM1	CATGAGAACCTTGAGGGAGAAGAGGACTGAGCCAGGCTGGAGCTTTTGTG	NM_001001723.1
ILMN_1765557	0.410396	0.00539	OLFML2B	-3.11655	-2.09015	-1.87687	46195718	OLFML2B	TGACCAGTAACCACCTTCCTTCAAGCCTTCAGCCCCTCCAGCTCCAAGTC	NM_015441.1
ILMN_1714691	0.410396	0.00544	HOXD10	-3.11302	-2.09698	-0.844916	85380098	HOXD10	AGTGCTGGAGGACTGGGAAAGCGGAAACAAAACCTTCACCGCTCTTTGTT	NM_002148.3
ILMN_1794492	0.410396	0.00544	HOXC6	-3.11265	-2.09771	-0.795951	93141222	HOXC6	TCCCTTCGTGTTACCCTCCTGTATAAATCCAACCTCTGGGTCCGTTCTCG	NM_004503.3
ILMN_1782050	0.410396	0.00546	CEBPD	3.11146	-2.10001	0.722924	125661056	CEBPD	CGCCGGGTGCCCGCTGCAGTTTCTTGGGACATAGGAGCGCAAAGAAGCTA	NM_005195.3
ILMN_1728870	0.410396	0.00546	DDX3X	3.11123	-2.10046	0.439557	87196350	DDX3X	GCTCAAGGTCACAAGAAGAAATGAAAGGAACAATCAGCAGCCCTGTTCAG	NM_001356.3
ILMN_1652753	0.410396	0.00548	PAAF1	3.10998	-2.10288	1.56015	13376750	PAAF1	CGACGCTACCAGCTTTCTGACCTCTGACTTCTTGGAAAGAGCAGTCCCGG	NM_025155.1
ILMN_1709112	0.410396	0.00549	CHM	3.10853	-2.10569	1.54554	82617643	CHM	CAGCCAGAGGCTTCAGAATCCAGTGCCATACCAGAGGCTAACTCGGAGAC	NM_000390.2
ILMN_1786429	0.410396	0.0055	P2RY5	-3.10808	-2.10656	-0.67423	111118965	P2RY5	GCACCCGCCGTTTTTGTTCAGTCTACCCACTCTCAGGGTAACAATGCCTC	NM_005767.4
ILMN_1685433	0.410396	0.00551	COL8A1	-3.10758	-2.10753	-1.14659	32895367	COL8A1	GAGACCGGGTGTTCCTCCAGATGCCCTCAGAACAGGCTGCAGGACTGTAT	NM_020351.2
ILMN_2325763	0.410479	0.00553	VCAM1	-3.10569	-2.11118	-1.46787	18201908	VCAM1	ATATGACATGCTTGAGCCAGGGCTTTCCTGCTCCGAAAATCCTGTGGAGC	NM_080682.1
ILMN_1667429	0.410479	0.00554	SLC25A20	3.10526	-2.11201	0.958349	46276890	SLC25A20	TTCAGGCTTCTTCAGGAGAAAGCAAGTACACTGGTACCTTGGACTGTGCA	NM_000387.3
ILMN_1790197	0.411824	0.00557	FLJ20674	-3.10272	-2.11694	-1.47725	141803293	FLJ20674	GAAGTTGAATCTGGGCTCTGTTGCTTCCTTCTTTCATGGGCTAGAGCACG	NM_019086.3
ILMN_1681296	0.413216	0.0056	ICAM4	3.10013	-2.12195	1.08052	12545400	ICAM4	TTTGGCCTCCGGTTCCATCGCTGCCCTTGTAGGGATCCTCCTCACTGTGG	NM_001544.2
ILMN_1743145	0.415451	0.00565	ERAP2	-3.09587	-2.1302	-1.67354	141802345	ERAP2	AACTTGGCAGCTCTCCTTCATGCGATTGCCAGACGTCCAAAGGGGCAGCA	NM_022350.2
ILMN_1699254	0.415451	0.00566	PLEKHH1	-3.09555	-2.13081	-0.798331	110225343	PLEKHH1	TGGAGCTGTGTTCACACTGAATTTGGGGTCAATCTATTTCCCCCACCCTC	NM_020715.2
ILMN_3184843	0.416439	0.00569	IP6K3	3.09341	-2.13495	1.58582	218777829	IP6K3	TTCTCCTTGTATGGACTGCTCGCTCCAAGGGCAGGCAGAGCTCATGAATG	NM_001142883.1
ILMN_1802157	0.418273	0.00573	THOC1	-3.08979	-2.14195	-0.590525	154448889	THOC1	GTGACAGTGAAGACATGAAGATGAGAGCTAAGCAGCTCCTGGTTGCCTGG	NM_005131.2
ILMN_1793849	0.418273	0.00575	TANK	-3.0886	-2.14426	-0.584016	19743570	TANK	AGAGGAATAGTCTACAAAGGAAGACTTGTAACCTGGAGAAGAGACCTGTC	NM_133484.1
ILMN_1769449	0.418273	0.00575	MBLAC2	3.0882	-2.14503	0.572969	42822879	MBLAC2	TTACTCCCAGCACCAAAAGGTAATTGACCAGCCTCAACACAATTTTGGAC	NM_203406.1
ILMN_1696360	0.42194	0.00583	CTSB	3.08245	-2.15615	0.770615	66346647	CTSB	TCCACTGTCCTGCCAAGGTACACCTCAGTACTCCCCTTCCCAACTGAAGT	NM_147780.2
ILMN_2388517	0.42194	0.00583	MTERFD3	-3.08207	-2.15687	-0.782304	74271829	MTERFD3	CAGGATAAGGAAACTGAATTCCTCAGGCTACAGAATAAAGGATGGACATC	NM_025198.3
ILMN_1718977	0.42194	0.00586	GADD45B	3.08012	-2.16064	0.864417	86991435	GADD45B	GACCACACTTTGGGACTTGGGAGCTGGGGCTGAAGTTGCTCTGTACCCAT	NM_015675.2
ILMN_1759325	0.42194	0.00588	C16orf91	3.07871	-2.16336	1.06378	58197571	C16orf91	GCACTGAAGGACTTGGCTGGTGGATGGGGCACTTGGCTATGCTGATTCGC	NM_001010878.1
ILMN_2234412	0.42194	0.00588	TLE3	3.07864	-2.16351	0.594256	4827029	TLE3	TCAACGCCTGGAGGACGCCTTATGGAGCCAGCATATCCCAGTCTAAAGAA	NM_005078.1
ILMN_2107933	0.42194	0.00589	ZNF285A	-3.07787	-2.165	-0.925465	38566701	ZNF285A	CCCAGTAACCCTTGCAGTTAAGAGTGTGCCCATGTGATTGAGTTCTAGCC	NM_152354.2
ILMN_1796537	0.424127	0.00594	FYB	-3.07452	-2.17147	-1.27868	42476117	FYB	TGCTGAAGTTTTTGGCCAGCTTTAGTTTGAGGACTCCTTGATAAGCTTGC	NM_001465.3
ILMN_2088410	0.42427	0.00596	PSMG2	3.07284	-2.1747	0.498191	39725705	PSMG2	CTGCAGCTTCGTAGTACTCCCTTCCGGTACCTACTTACACCTTCCATGCA	NM_020232.3
ILMN_2321485	0.42427	0.00597	PPP1R8	3.07223	-2.17588	1.65054	20336237	PPP1R8	CCAGGCCCTCAGGTTGAATCCAGAGCTGTAGAGGTTACAGTAGCATCACC	NM_014110.3
ILMN_2387385	0.42514	0.00599	IGFBP1	3.07026	-2.17968	0.951681	61744448	IGFBP1	ATGGATGGAGAGGCGGGACTCTGCTGGTGCGTCTACCCTTGGAATGGGAA	NM_001013029.1
ILMN_2170209	0.428637	0.00607	RASD2	-3.06484	-2.19015	-0.888418	22027485	RASD2	TCTCACCCAGGCACAGCCCCGCCACCATGGATCTCCGTGTACACTATCAA	NM_014310.3
ILMN_3238837	0.428637	0.00609	MSTO2P	-3.06328	-2.19314	-0.623521	197927205	MSTO2P	TCTCCTGGGTTCAAGCAATTCTCCTGCCTCAGCTACTTTGGGAGAGGCTG	NR_024117.1
ILMN_1705218	0.428637	0.0061	TRAPPC2	3.06256	-2.19454	1.77748	58533178	TRAPPC2	CCAGATGTCCTCTTGGAAGCAAGATCGCTCCGGGTTGAGATCCACAGAGC	NM_001011658.1
ILMN_2348503	0.428637	0.00611	PPIE	3.06214	-2.19534	1.49722	45439314	PPIE	AGCATACGGGACCAGGTCTACTATCCATGGCCAACTCTGGCCCAAACACC	NM_006112.2
ILMN_1768062	0.428637	0.00613	ADK	3.06038	-2.19874	1.20466	32484974	ADK	CGAAGATGGCAGCTGCTGAGGAGGAGCCGAAGCCCAAAAAGCTGAAGGTG	NM_006721.2
ILMN_3230508	0.428637	0.00613	NCRNA00152	3.06031	-2.19888	1.50935	209413710	NCRNA00152	CCTGGAAACCTCTTGACTCTTCTGTGATGTCCCCAGTGATCCAGCAGCCC	NR_024204.1
ILMN_1811790	0.429132	0.00618	FOXS1	-3.05707	-2.20513	-0.9888	34304365	FOXS1	CAGCCCTGGTGAGCCAAGGACAACCACACAGAAAGCCAGGATTGAAGCGG	NM_004118.3
ILMN_1764694	0.429132	0.0062	ZFP14	-3.05559	-2.20798	-0.509925	55741658	ZFP14	CCCACAGCAGCAACACCAGGCCTGTCACACAGATGAATGTGTTGAGGGAA	NM_020917.1
ILMN_2234873	0.429132	0.00621	NME2	3.05477	-2.20955	1.76909	66392204	NME2	GGCCTCCGCGGGCCCCGCCAGAGCCTGCGCCCGGGCCCTGACCGCACCTC	NM_001018138.1
ILMN_1658080	0.429132	0.00622	ZNF573	-3.05392	-2.21119	-1.08017	40789269	ZNF573	GAGCGCGCCATTCATCATCAGACAGCCCACACTGGTGAGAAATGATGGAA	NM_152360.2
ILMN_2174729	0.429132	0.00624	ZNF318	-3.05283	-2.21331	-0.547016	120587018	ZNF318	CGACAAATCGGTAAGGCTTATTCATGGTTCATTGCCAGGAGCAGATATGC	NM_014345.2
ILMN_1772727	0.429132	0.00625	GPR75	3.05158	-2.21572	1.25232	5803024	GPR75	GCACTTCAGCCAAGCAGATTCCAGTCCCCTCCGTTTAAAGTCATGGAGGC	NM_006794.1
ILMN_1744118	0.429132	0.00626	ASTN2	-3.05112	-2.2166	-0.928116	46488916	ASTN2	AGGAAGCTCTGAGGATGGTTGCAGTGAGGAAGCATGGGTCTTTAAGGACT	NM_198186.2
ILMN_1769720	0.429132	0.00626	STAU2	3.05096	-2.2169	1.07154	7657624	STAU2	GAGCAGAATCTCCGGGAAATGACTTAGTCTGGCCACATGCATAGCCCATC	NM_014393.1
ILMN_1797055	0.429132	0.00627	LIN52	3.05045	-2.21789	1.02861	67003577	LIN52	GGGGAGTCTCACCACGGCTAATTTGATGGAGAAGGTTCGAGGCCTACAGA	NM_001024674.1
ILMN_1743621	0.431971	0.00633	C17orf69	-3.04607	-2.22633	-0.827836	22748982	C17orf69	TGGCCCATGGCGTCCAGCTTCTGCTTGAATACTTTCAGTGCCCGGGAGCT	NM_152466.1
ILMN_1806023	0.431971	0.00634	JUN	3.04548	-2.22745	1.05283	44890066	JUN	GGGAGGTTTGTGAGAGCGAGGCTGAGCCTACAGATGAACTCTTTCTGGCC	NM_002228.3
ILMN_1780582	0.433109	0.00637	CD83	3.04308	-2.23209	0.999628	94421023	CD83	GCCTTCTGTAGGAATTCTTTTGGGGAAGTGAGGAAGCCAGGTCCACGGTC	NM_001040280.1
ILMN_1707748	0.433109	0.00639	PIM3	3.04198	-2.2342	0.955632	113429645	PIM3	GCCTGGCGTCTGTCCTGGCCCCGCCTGTCAGAAGATGAACATGTATAGTG	XM_938171.2
ILMN_1726459	0.433109	0.00641	NPAS4	3.04081	-2.23645	1.07765	31341471	NPAS4	CTGCCCAGATGGCCACCTCGTGGTGCTGCGGTGACTTTGTAGCCAACTTT	NM_178864.2
ILMN_1666494	0.433109	0.00642	CRK	3.04024	-2.23754	0.932633	41327711	CRK	GCCAGGGTTATCCAGAAGCGAGTCCCCAATGCCTACGACAAGACAGCCTT	NM_016823.2
ILMN_1684227	0.43856	0.00651	GPR146	3.03371	-2.25012	1.10817	41349503	GPR146	CTCAGCCACCAAATGTCCCTGACACCCTCCCCAGCCCCCACAGATAACAT	NM_138445.2
ILMN_1786720	0.442263	0.0066	PROM1	-3.02778	-2.26151	-0.972723	5174386	PROM1	TCCAGATGTAGGCATTCCCCCCAGGTCTTTTCATGTGCAGATTGCAGTTC	NM_006017.1
ILMN_3185707	0.442263	0.0066	HEATR7A	3.02755	-2.26196	1.56604	149944468	HEATR7A	AGCACGCAGAGACCTTCTACTTGTCCAAGAGCCTGGGCCAGATCCTCGAG	NM_001099280.1
ILMN_2372398	0.442263	0.00663	ALDH5A1	3.02595	-2.26503	0.886853	25777719	ALDH5A1	TGGCATAGCTACCGTGAGTTCTCAGCAGGAACTTCCCAGCGATGATAATG	NM_001080.3
ILMN_1711102	0.442263	0.00663	B3GNT2	3.02562	-2.26567	1.07874	92091578	B3GNT2	GGCCCTGAGGCTGTACCATATCACTGACCAGGTCCATCTCTACCCCATTG	NM_006577.5
ILMN_1690695	0.442263	0.00666	PEX11A	-3.02342	-2.26989	-0.639227	4505716	PEX11A	CAACCTGTGATGTGGGCAGAGATGAGGCCAAGAACGGAGAAGGGAGGAGC	NM_003847.1
ILMN_2393573	0.442263	0.00667	RASSF1	3.02306	-2.27059	0.963727	25777678	RASSF1	GGCCTGCAGCAGGAGTGGTGCAGACAGAAGTCTCCTCAATTTTTGTCTCA	NM_007182.4
ILMN_1731714	0.442263	0.00667	CREB5	-3.02295	-2.2708	-0.628099	59938769	CREB5	GAGGAAGTCCCAAAAAGGTGCTGTCACTTTAAGTTCTGGACTTGGGGTTC	NM_182898.2
ILMN_3244319	0.442624	0.0067	CCDC125	-3.02134	-2.2739	-0.828513	88014608	CCDC125	CAGCCTGGGCAACATGGTGAAACCCCATCTATACAAAAACTCGGCAAGGC	NM_176816.3
ILMN_2176467	0.442624	0.00671	COX6B2	-3.0206	-2.27532	-0.968034	93277117	COX6B2	GAGAGGCGGATACAGAAACTTGTGAGAATGTGATGAACGCTCTGAACCCC	NM_144613.4
ILMN_1693338	0.443495	0.00674	CYP1B1	-3.01874	-2.27889	-0.514796	13325059	CYP1B1	GCTTTCATGTCCCAGAACTTAGCCTTTACCTGTGAAGTGTTACTACAGCC	NM_000104.2
ILMN_2261519	0.444578	0.00677	AIRE	-3.01626	-2.28364	-0.95485	4557290	AIRE	TGAGATTGCGCCACTGCACTCCAGTCTGGTCGGCAAGAGTGAGACTCCGT	NM_000383.1
ILMN_1729318	0.444578	0.00678	TOR1AIP1	3.01568	-2.28477	0.793247	39753956	TOR1AIP1	TCCGCGCATCCACTTGTTGCAGTCCAAGTCCTCTAGTGCAACGCCATAGC	NM_015602.2
ILMN_2393765	0.445147	0.00681	IGLL1	-3.01356	-2.28882	-1.7865	23110977	IGLL1	CAGAAGCTACAGCTGCCAGGTCATGCACGAAGGGAGCACCGTGGAGAAGA	NM_020070.2
ILMN_1751757	0.445147	0.00682	CES3	3.01314	-2.28964	1.58784	38455414	CES3	GATTAGCCTAACCCCACTCTGTCACCCACACCAGGATCGGGTGGGACCTG	NM_024922.3
ILMN_1694075	0.445544	0.00684	GADD45A	3.01176	-2.29228	1.06234	9790904	GADD45A	CTGCACTGCGTGCTGGTGACGAATCCACATTCATCTCAATGGAAGGATCC	NM_001924.2
ILMN_2110829	0.446623	0.00688	LOC441743	-3.00965	-2.29634	-0.593009	113930684	LOC441743	CACAAGATGGCGCTGAAAGCAAAGAAGGAAGCTCCTGCCTCTCCTGAAGC	NM_001045548.1
ILMN_1713636	0.446623	0.00689	S100A6	-3.00873	-2.29809	-0.626439	52352807	S100A6	GGAGTATGTCACCTTCCTGGGGGCCTTGGCTTTGATCTACAATGAAGCCC	NM_014624.3
ILMN_1756590	0.446993	0.00692	SYS1	3.00709	-2.30125	0.53893	56676380	SYS1	CCATCTGTGGTTGGAGCGCCTCTTTGGGATTCACTTCAAGGTCTTGTGCC	NM_033542.2
ILMN_1696162	0.446993	0.00693	MME	3.00642	-2.30254	1.66317	116256328	MME	AGATGTGCAAGTGGCGAAGCTTGACCGAGAGCAGGCTGGAGCAGCCGCCC	NM_000902.3
ILMN_3236377	0.448565	0.00697	C2orf69	-3.00389	-2.30738	-0.618946	205360988	C2orf69	TCCAGCTACTCAGGAGGCTAAGGCAGGAGGATTGCTTGAGCCCAGGCTGT	NM_153689.5
ILMN_1760530	0.449195	0.007	BLOC1S2	3.00191	-2.31118	1.32289	46852397	BLOC1S2	CATCTTAACTGTCCCTTCCAACCACCCTCCACACTGCTGCCAGAGCAATC	NM_173809.2
ILMN_1663858	0.449195	0.00702	ZNF286A	-3.00029	-2.31428	-1.29093	10190685	ZNF286A	TGCTGGGTTCAAAGTCCTTAGAATTCCCTTCCTCCCTCAACAAGCTGCTG	NM_020652.1
ILMN_1729374	0.449195	0.00705	ETFB	2.99849	-2.31775	1.32157	62420878	ETFB	AAGATGGCGGAGCTGCGCGTGCTCGTAGCTGTCAAGAGGGTCATCGACTA	NM_001985.2
ILMN_1782851	0.449195	0.00706	TAPBP	2.99806	-2.31857	1.4957	27436896	TAPBP	CTGTGTACAAACCCCCCAAAGTGTCCCTGATGCCAGCAACCCTTGCACGG	NM_172209.1
ILMN_2131336	0.449195	0.00709	TMEM194	2.99614	-2.32225	1.28203	58037092	TMEM194	GCCAACACCAACTCGTAGCTTTAGTGGCAGATGGGAGTGGTCACAGACTC	NM_015257.1
ILMN_1772957	0.449195	0.00709	FOXRED2	2.99576	-2.32298	0.685497	34303916	FOXRED2	GTTCCTAGTCTCTTCTTCATTGCCCTTCCTCACCAGCAATCTGCACTTTC	NM_024955.4
ILMN_3234837	0.449195	0.00711	PKDCC	-2.99507	-2.32428	-0.813756	208431816	PKDCC	CCTCAGCATGAGCCAAGACTGGGGTCAGGGAGCAGGTGTGGTTTGAGCCA	NM_138370.2
ILMN_2193233	0.449195	0.00712	MGC29506	-2.99423	-2.3259	-2.07849	117938313	MGC29506	TCCTGGACTCTACCCTCCTCTGAAAGAAGCTGGGGCTTGCTCTGACGGTC	NM_016459.3
ILMN_1747442	0.449195	0.00713	P4HA1	2.99378	-2.32676	0.715505	63252887	P4HA1	CACCATTTCAAACCCAATAACAGGAGACTTGGAGACGGTACATTACAGAA	NM_001017962.1
ILMN_1774949	0.449195	0.00713	PIGP	2.99366	-2.327	1.31405	82799479	PIGP	TCCTCTTCCCCACTGCGGCTCCCCAGTCGGCGCTTGCGCGGAGAACTCAG	NM_153682.2
ILMN_1725175	0.449453	0.00718	FOSL2	2.99064	-2.33278	0.520808	44680151	FOSL2	AGCAGCAGAATGAGCCAGGAGTAGCAGGAGATGGGCAAAGAAAACTGGGG	NM_005253.3
ILMN_2408572	0.449453	0.00718	RNASE4	2.99018	-2.33365	1.58599	37577169	RNASE4	CCTGCGGCAACACGTGCACCCTGAGGAGACAGGTGGCAGTGATCGCTACT	NM_194430.1
ILMN_1713542	0.449453	0.00721	TRIM14	2.98885	-2.3362	0.998896	15208662	TRIM14	TCTACCTAGATCAGCGTGGCTGGTCCCCTTACTGCCTGCTTCTTAGGGCC	NM_014788.2
ILMN_1722364	0.449453	0.00722	C6orf108	2.9881	-2.33764	0.798838	40354200	C6orf108	CAAGGGGTAAGGGAGCTGTGAGGGTGTGGATGGGAGGCAGCTTCACCTTT	NM_199184.1
ILMN_1811313	0.449453	0.00723	SLIT3	-2.98727	-2.33923	-1.15861	11321570	SLIT3	CCTCGTTTGTAGAAGAGGTGGAGAGACACTTAGAGTGCGGCTGCCTCGCG	NM_003062.1
ILMN_2045994	0.449453	0.00725	SEPW1	-2.98627	-2.34114	-0.674332	42544245	SEPW1	TCTTTGCATACCCCATGTCTTCCCCAGTTGTCCCCTGGAGTTTGGGGGGA	NM_003009.2
ILMN_1727738	0.449453	0.00727	RAB33B	-2.9849	-2.34376	-0.855646	13786128	RAB33B	GTGTCACTGTTACATTTCCCCCAAGAAGTTCAATAAACCAGCTTAGCCAC	NM_031296.1
ILMN_1717078	0.449453	0.00728	DNAJC16	2.98454	-2.34445	1.15123	82524312	DNAJC16	GGAAGCCATAGGGTCGTGCAGTGATGTTGACTCTTCCCTCTACCTGGGTG	NM_015291.2
ILMN_2109489	0.449453	0.00728	GZMB	-2.98438	-2.34476	-1.9164	32483414	GZMB	ACAGGAAGCAAACTAAGCCCCCGCTGTAATGAAACACCTTCTCTGGAGCC	NM_004131.3
ILMN_2148290	0.449453	0.00729	PDCD7	-2.98349	-2.34646	-0.684708	22027540	PDCD7	CACACCTGTAGTCCCAGCTACTGGGGAGGCTGAGGCAGGAGAATGGTGTA	NM_005707.1
ILMN_1804929	0.449453	0.0073	OXTR	-2.98306	-2.34729	-0.640323	32307151	OXTR	AGGGCCTGGAGGCTGTGAGAGATGAGGCATGACTACTAAGGGTTTGGGGT	NM_000916.3
ILMN_3241051	0.450787	0.00734	LOC644907	-2.98082	-2.35158	-1.19365	147900595	LOC644907	ACCAACCCCAATGCCAGGCTGCGCAGCGAAGAAAATGAGTAGACAGCTCG	NM_001090027.1
ILMN_1669046	0.451412	0.00736	FOXQ1	-2.97927	-2.35453	-1.0256	145309319	FOXQ1	TGCAGGCAACGGGCTACAGCTTTATTAGTGGTTCTCTAACTGTGGTCTCC	NM_033260.3
ILMN_1777579	0.458307	0.00752	TIGD1	-2.96998	-2.37229	-0.978026	22209000	TIGD1	CCGATGTCTTATTTTAGGAAATTGCCACAGCCACCCCAACCTTCAGCAGC	NM_145702.1
ILMN_1675898	0.458307	0.00752	SH3BP5	2.96982	-2.37261	0.717281	109134335	SH3BP5	CTGCATGGACGCGGCACTGAAGCGGAGCCGCTCGGAGGAGCCAGCCGAAA	NM_004844.3
ILMN_1787275	0.458307	0.00756	STAG3	2.96735	-2.37733	1.03145	57863309	STAG3	GGCCCCTCCCCAGCTCCACTCCCTACCTCAAGAATGTGACCATTTGGAAA	NM_012447.2
ILMN_3251751	0.458307	0.00758	MFSD8	-2.96666	-2.37864	-0.610778	199560897	MFSD8	GGCACAAAAGAAGGCGAAAGGAAGTAACATGGGATTGGGAAAAGAGCAAG	NM_152778.2
ILMN_1808333	0.458307	0.0076	PPP1R7	2.96504	-2.38173	1.28316	4506012	PPP1R7	GAGTTCTGGATGAACGACAATCTCCTTGAGAGCTGGAGCGACCTCGACGA	NM_002712.1
ILMN_1728496	0.458307	0.00762	SYT9	2.96404	-2.38364	1.34517	31342257	SYT9	CCTGCCCAGAGAGCCAGCAGCCTTGGGATACTAATGAGGATGCAACTGGC	NM_175733.2
ILMN_3240306	0.458307	0.00762	SNORD51	2.96403	-2.38366	1.00191	77993291	SNORD51	CAAATCACCATCTTTCGGCTGAGTTCGTGATGGATTTGCTTTTTTCTGAT	NR_002589.1
ILMN_1704091	0.458307	0.00762	DGAT1	-2.96386	-2.38399	-1.68706	7382489	DGAT1	TCTCTGCCCTATGGGGCTCTGTCCTGCACCCCTCAGGGATGGCGACAGCA	NM_012079.2
ILMN_3310573	0.458307	0.00763	MIR24-2	2.96349	-2.38471	1.13694	262205681	MIR24-2	GCTGAAACACAGTTGGTTTGTGTACACTGGCTCAGTTCAGCAGGAACAGG	NR_029497.1
ILMN_2294976	0.458307	0.00764	RNASE4	2.96265	-2.38631	1.59207	37577169	RNASE4	GTTGGAAGAGATGGTGATGGGCCTGGGCGTTTTGTTGTTGGTCTTCGTGC	NM_194430.1
ILMN_1725098	0.458307	0.00766	RTN4RL2	2.96154	-2.38842	1.4725	30425562	RTN4RL2	GCCCCCAGCCGATCCCTCCACCCTCTACCGAGATCTGCCTGCCGAAGACT	NM_178570.1
ILMN_1712291	0.458307	0.00767	MICALL2	-2.96123	-2.389	-1.23747	142387938	MICALL2	GGTCACCAAAAAGCAAAAGCAGCCCCTCCCAGTAGTAGCCAGTAGGGCCG	NM_182924.2
ILMN_3251676	0.458307	0.0077	BCL2L15	-2.95956	-2.3922	-1.46135	121949805	BCL2L15	CCGAGCCAGTCACTAAAGCTGCCCTCCTCCTACTGTTCCCTATGTTTCAT	NM_001010922.2
ILMN_3310509	0.458307	0.00772	MIR30C2	-2.95843	-2.39436	-1.00083	262206165	MIR30C2	ACATCCTACACTCTCAGCTGTGGAAAGTAAGAAAGCTGGGAGAAGGCTGT	NR_029598.1
ILMN_1712454	0.458307	0.00772	LRRC52	2.95805	-2.39507	0.925604	142377344	LRRC52	CTACCAGAACACCCGCCACAAGTCGAGTGAAGAAGATGAGGACGAGGCCG	NM_001005214.2
ILMN_1780783	0.458307	0.00774	SOCS7	-2.95687	-2.39733	-1.033	53831996	SOCS7	GTGAGGGAACAGGAAGGTTGGGATTCTCTGTGCAGAGACTTTGGTTCCCC	NM_014598.1
ILMN_3245829	0.458307	0.00775	AQP7P1	-2.95648	-2.39808	-0.714651	219555684	AQP7P1	CATGGATGTGCTGAGTCTGAGTTGCCTATGGGACTTGGAATGGGGGGTGG	NR_002817.2
ILMN_1702696	0.458307	0.00776	AFAR3	-2.95616	-2.39869	-0.909585	41152111	AFAR3	GTACTTGCCTAGGACTGGGAGGAGGATTGCGAGGAAATGGAGATTCACTG	NM_201252.1
ILMN_2169152	0.461647	0.00783	SRGN	2.95204	-2.40656	1.00665	45935370	SRGN	GTACCAATGGGTGCGCTGCAATCCAGACAGTAATTCTGCAAACTGCCTTG	NM_002727.2
ILMN_1759186	0.461847	0.00786	MGC16291	2.95042	-2.40964	1.38475	113421945	MGC16291	GACCTGCACAGTTCAGGCCCAGATTGTTCCAGGATCAACCCTACAGTAGA	XR_017966.1
ILMN_1680231	0.461847	0.00787	FAM119B	2.94996	-2.41051	1.06623	45827722	FAM119B	GCGTGGAGCCTGTGGACATGCTCTATCCATGTCTACCATGACTCCCTGGG	NM_206914.1
ILMN_1750167	0.461847	0.0079	PRR3	-2.94815	-2.41396	-0.679474	117320534	PRR3	CTGGCCCTGAGGAAATGGGTCAGGAGTTGTATTGGCAAGAGGGAGGGGTG	NM_025263.2
ILMN_1813955	0.461847	0.0079	SERTAD3	2.94795	-2.41435	1.26765	42741651	SERTAD3	TCGCAACGCTGTGGGCGTTCCAGGAGGTGGTCGTGGCGAACCTGGCAGCT	NM_203344.1
ILMN_1729288	0.461847	0.00791	C1QTNF6	-2.9474	-2.4154	-1.32321	32967293	C1QTNF6	CCAAGTGCCAGGAAGACCTGTGCTATAAACCACCCTGCCTGATCCTGCCC	NM_031910.3
ILMN_2341229	0.46278	0.00795	CD34	-2.94539	-2.41923	-0.642749	77539053	CD34	GTTGATTTCTTTCCAGAGGGGTTGAGCAGGGATCCTGGTTTCAATGACGG	NM_001773.2
ILMN_1768506	0.46278	0.00796	MAPK15	-2.94465	-2.42064	-1.62478	95147355	MAPK15	CTCCTGCACCCCTTAGCCCTCCCTGCTTTGCCTGGCCCGTTGAAGTTCCA	NM_139021.2
ILMN_1663916	0.46278	0.00799	ARHGAP9	-2.9432	-2.4234	-1.05535	122939150	ARHGAP9	GTCTCTATCTTCATGAGTGTGACTTGAGGTGTTGGGATGGGTGAGGGAGC	NM_001080157.1
ILMN_2185845	0.46278	0.00799	BRSK1	-2.94298	-2.42383	-1.43231	24308325	BRSK1	TGCTCTCCGGAAGGAATTCTGGTTTCGCGTGATCCTGCCTGCGTCCGTGT	NM_032430.1
ILMN_1683589	0.464267	0.00804	PPP2R2D	-2.94033	-2.42886	-0.598003	51093852	PPP2R2D	TTCCTGCAGAGAAGTCTGGCAGGGGTGTGAATTCTCTCTTCCCTTCAGGG	NM_001003656.1
ILMN_2411236	0.464267	0.00805	NRCAM	-2.93979	-2.42989	-0.872414	81158223	NRCAM	CCTCTTCCATACTGGTAGATGCGAAATTTATCTGTGCATGAAAGGGTCAC	NM_005010.3
ILMN_1815292	0.464294	0.00812	RPL7	-2.93575	-2.43758	-0.509942	72187675	RPL7	TGCATGGGGGTACCCCAATCTGAAGTCAGTAAATGAACTAATCTACAAGC	NM_000971.3
ILMN_1692936	0.464294	0.00813	OVOL1	2.93515	-2.43874	1.23158	38570157	OVOL1	GCCAAACCCCACCTGAAGCAGAACCACTTTGGCCTCCCCTGCCCAAAATG	NM_004561.2
ILMN_2084059	0.464294	0.00813	SLC12A4	-2.9351	-2.43883	-0.911216	34147633	SLC12A4	GGTCTTGTGGGACCCTGGGATGTTTGGGGACTTTACTATCTAGCACCCCA	NM_005072.3
ILMN_2407464	0.464294	0.00814	FASTK	-2.93483	-2.43934	-0.764402	39995106	FASTK	CCATGGGGGGTGGATGATTTGCACTTTGGTTCCCTGTGTTTTGATTTCTC	NM_033015.2
ILMN_1688639	0.464294	0.00814	FBXL2	-2.93452	-2.43994	-0.941172	16306581	FBXL2	GCTCGGAGTCTGTGTTGCCTGATTGGAAAGTAGAAGCTCTGGTGTATGCT	NM_012157.2
ILMN_1792995	0.464294	0.00814	MEIS2	-2.93449	-2.43999	-0.941967	27502382	MEIS2	CTGGGCTGCTTGTTTTGTCTCTGAAATTGACAAGGACGCAGGGAATCCGC	NM_172316.1
ILMN_1696974	0.464294	0.00816	ANG	2.93369	-2.44151	1.40607	148277045	ANG	TGTGTTGGAAGAGATGGTGATGGGCCTGGGCGTTTTGTTGTTGGTCTTCG	NM_001097577.1
ILMN_2400603	0.464805	0.00818	TIRAP	-2.93233	-2.44409	-0.955073	89111121	TIRAP	GCAGAGCTGCCTACCCACCTGAGCTCCGATTCATGTACTACGTCGATGGC	NM_001039661.1
ILMN_1746465	0.465261	0.00821	FJX1	-2.93104	-2.44656	-0.852547	18765710	FJX1	CTCTGGGGAGCCCTGCAGACCTTGACAATTTGCCTGACTCATTCCTGACC	NM_014344.2
ILMN_3236373	0.467431	0.00826	MSL2	-2.9281	-2.45214	-0.941062	38570120	MSL2	GTACAAGACATGGAGAAGAAACCTTTGGACACAGAGCAGATGACACCTCC	NM_018133.2
ILMN_1703477	0.468825	0.00832	ARHGEF2	-2.92513	-2.4578	-0.646676	15011973	ARHGEF2	TGGGGGATTTTTCAGTGGAACCCTTGCCCCCAAATGTCGACCAGCCCCCA	NM_004723.2
ILMN_1743619	0.468825	0.00834	NEDD9	2.92403	-2.45989	1.49217	78486552	NEDD9	CTCCTGGGGTTTCCCATTGGCGTGTCTTGAGCTGCTCTGGTGATAACCGT	NM_182966.2
ILMN_2288915	0.468825	0.00834	DNAJB14	-2.92382	-2.46028	-0.48952	31542690	DNAJB14	CTAAACAACATACTGTCATAGGAAAACTGGAGAGCTTAACCAACTTGCTC	NM_024920.3
ILMN_1706590	0.468825	0.00835	MLLT1	2.92335	-2.46117	1.54919	90403588	MLLT1	CGAGGAGACTGGCCACTTCAATGTCACCAACACCACCTTCGACTTCGACC	NM_005934.3
ILMN_1698715	0.469136	0.00837	NHLRC2	2.92221	-2.46335	1.13087	42476012	NHLRC2	GCTAGCAACCCATTGCCACCACCTACTGTCTCCCATCCTGACTATCACTG	NM_198514.2
ILMN_1705107	0.470115	0.0084	SDCBP2	2.92043	-2.46673	0.705638	134152697	SDCBP2	GAGGCTCAGGCAGGGCCCACAGGCAGCCGATTCTCTTGTGCTGATTTAAA	NM_015685.4
ILMN_1807501	0.471178	0.00846	GINS4	2.91748	-2.47233	1.35035	14150121	GINS4	CAGATGAGCAGAGGGACTACGTGATTGACCTGGAGAAGGGCTCACAGCAC	NM_032336.1
ILMN_1806779	0.471178	0.00848	ZNF155	-2.91625	-2.47467	-0.929769	37655170	ZNF155	AGTGCATTCCTTCCCCTTCCCAGTCCATAAAAACCCCGGACCCCAGCCTC	NM_003445.2
ILMN_1687301	0.471178	0.00849	VCAN	-2.91604	-2.47506	-1.84703	21361115	VCAN	CAGCCATAGGTGCAGTTTGCTTCTACATGATGCTAAAGGCTGCGAATGGG	NM_004385.2
ILMN_1652826	0.471178	0.0085	LRRC17	-2.91537	-2.47634	-1.6784	5031970	LRRC17	GAATGCTATCATCCTGCTTGCCTGTCCATTTGTGGAACAGCATCTGGTGA	NM_005824.1
ILMN_1695754	0.471178	0.00851	C3orf35	2.91485	-2.47732	1.00353	153251876	C3orf35	CTCTTCTCATGGCCACCATTGTCCCAGGATGTGAGGTCTGGAACAGCTGC	NM_178342.2
ILMN_1652490	0.471178	0.00853	MANSC1	2.91378	-2.47936	1.32683	31542649	MANSC1	CCTGGTGATAGGCCTCGTCCTCCTGGGTAGAATCCTCTCGGAATCACTCC	NM_018050.2
ILMN_1778308	0.471178	0.00854	COL4A4	-2.91351	-2.47987	-0.578802	116256355	COL4A4	CCTGTTCATCTTGAACTTGGCCTGAGAACATTTTCTGGGAAGAGGTAAGG	NM_000092.4
ILMN_2410347	0.47153	0.00856	HHLA3	-2.91234	-2.48209	-0.936741	81295795	HHLA3	GTCTTGTCAACGGAAAGGGGTCCCTATCCAGACCCCAAGAGAGCATTCTT	NM_001036645.1
ILMN_1731043	0.471914	0.00858	TRA2A	-2.91114	-2.48437	-0.985162	110227858	TRA2A	GCGCACACACCAACACCAGGCATCTACATGGGCAGACCAACTCATAGTGG	NM_013293.3
ILMN_2362232	0.472566	0.00862	ZNF331	2.90896	-2.48851	0.796076	121583654	ZNF331	AAACTCCCTGTGGGTGCAATGAGTCTGGAAAAGACCATTGAGTCTTCTAG	NM_018555.5
ILMN_1704424	0.472566	0.00863	PLA2R1	2.90853	-2.48932	1.22652	55953105	PLA2R1	ATGGACTCTCCTACCGCCCCTACCCCCTTGGTACATGGCTGGCTTGGTAT	NM_001007267.1
ILMN_2232036	0.472566	0.00864	EFCAB7	-2.90802	-2.49029	-0.689059	55741648	EFCAB7	ACTGCATAAACAACAGAGGACTCAACATATTTGCAGTAGAAGTGGGACCC	NM_032437.1
ILMN_1751161	0.477205	0.00875	COL7A1	-2.90222	-2.5013	-1.18072	17738300	COL7A1	TGCACGTCCGTTATTTCAGTGACTTGGTCCCGTGGGTCTAGCCTTCCCCC	NM_000094.2
ILMN_1668426	0.477205	0.00876	SPESP1	2.902	-2.50171	0.591264	142368181	SPESP1	GTGCAACAGGCACTTCTTAGTGACACCAGCAACCCAGCATATAGAGAAGA	NM_145658.2
ILMN_2396801	0.477362	0.00878	PNPLA1	2.90103	-2.50356	0.838996	89886440	PNPLA1	CCAAAAAGCGCCGTGCCTCTGGTTCATGTGAAGGAAACCGTCAGCAAGCC	NM_001039725.1
ILMN_1815264	0.478317	0.00882	RHBDD3	-2.89908	-2.50725	-1.82481	11072100	RHBDD3	GTGTCACTGTTGGTTGGAGGACAAGTGGGCACTGAGACCCTGGTGACCCA	NM_012265.1
ILMN_1736256	0.478317	0.00883	CALR	-2.89825	-2.50882	-0.588435	5921996	CALR	CCCTCCAACCTGGGGGGCAGTGGTGTGGAGAAGCCACAGGCCTGAGATTT	NM_004343.2
ILMN_2195703	0.478317	0.00886	PPARGC1B	2.89677	-2.51162	0.855278	31543391	PPARGC1B	GGAGTGCGAGGTGCTGACAAGAAATAGGAGAGGCGAGAAGTACGGCTTCA	NM_133263.2
ILMN_1688067	0.478317	0.00887	Septin 5	2.89636	-2.51241	1.62607	90193629	Septin 5	ATGAGCACAGGCCTGCGGTACAAGAGCAAGCTGGCGACCCCAGAGGACAA	NM_002688.4
ILMN_1680104	0.478317	0.00889	SLC35C1	-2.89515	-2.51471	-0.965901	37059730	SLC35C1	AGGGTGGCTTGCAGTCCCTGGCCCTTCTGGTGGGCATTTGGTATGTCCTT	NM_018389.3
ILMN_3240717	0.478317	0.00891	C2orf14	-2.89442	-2.51607	-1.06428	190570177	C2orf14	GGCCAAAGTGTTGGGATTACAGGCATAAGCCATTGTGCCCGGCCTGTGTT	NR_023391.1
ILMN_1737394	0.478317	0.00891	LMNA	2.89438	-2.51616	0.700852	153281091	LMNA	ACAGAACACCTGGGGCTGCGGGAACAGCCTGCGTACGGCTCTCATCAACT	NM_005572.3
ILMN_1676288	0.478756	0.00893	ACBD4	-2.89315	-2.51848	-0.818647	13376028	ACBD4	AGGAGGTTGAGCTCTTGAGCAAGTTGGGACTTGGGCTGGGGCCTGGAAGA	NM_024722.1
ILMN_2294978	0.479352	0.00898	RNASE4	2.89111	-2.52236	1.82583	37577169	RNASE4	TGGAAGAGATGGTGATGGGCCTGGGCGTTTTGTTGTTGGTCTTCGTGCTG	NM_194430.1
ILMN_1758731	0.479352	0.00898	CYP2J2	2.89097	-2.52262	1.57819	18491007	CYP2J2	AGACATGGCACGTGTTCTGAAACCACTGGTGTCTGCTCAGATGTGTTGGG	NM_000775.2
ILMN_1702604	0.481269	0.00906	KCNA3	-2.88699	-2.53016	-1.86534	88758564	KCNA3	CTTCGGCAGTATCACAAGAAGATTAAAGTGGCAGACACCCCTTCCAGCGG	NM_002232.3
ILMN_2208435	0.481269	0.00906	CLDN16	-2.88685	-2.53041	-1.10855	21536296	CLDN16	ACAGAAAGCAATTTCCAAAGAGGCCAGGGACCCTAATCTTTGAAGAGATG	NM_006580.2
ILMN_2048700	0.481269	0.00906	ATAD2	2.88675	-2.53061	0.875234	24497617	ATAD2	GGCTTTGGCAATTCTTTCTCAGCCTACACCCTCACTTGTTGTGGATCATG	NM_014109.2
ILMN_1736460	0.483047	0.00911	MDM1	-2.88429	-2.53526	-0.709947	34222109	MDM1	GCTCCCACCATACCCGTTAGAAGGCGGCTGGCTTGGGATACAGAGAACAC	NM_017440.2
ILMN_1736585	0.485271	0.00917	TMED10	2.88143	-2.54067	0.598787	98986463	TMED10	GCCATCTGCTGTTGAGAATTGGTAGGTACTGCTTCTGAGAACCTGGCTGC	NM_006827.5
ILMN_2146372	0.485786	0.00921	KCTD6	-2.87939	-2.54453	-0.650101	40255152	KCTD6	GTCCCTGTGGTAGAAAACTTACTCTTTATGCCTGGTGCAGTATAATTCCC	NM_153331.2
ILMN_1702636	0.485786	0.00924	TUBB6	2.87792	-2.54731	1.47404	14210535	TUBB6	AGGCTACGTGGGAGACTCGGCGCTGCAGCTGGAGAGAATCAACGTCTACT	NM_032525.1
ILMN_1665515	0.485786	0.00925	MGC4677	2.87776	-2.54761	0.670325	62243377	MGC4677	TAACTGGGAGATGAAACAGGAAGCTCTATGACACACTTGATCGAATATGA	NM_052871.3
ILMN_2356559	0.485786	0.00926	WTAP	2.87724	-2.54859	0.460869	23199975	WTAP	CCAACGAAGAACCTCTTCCCAAGAAGGTTCGATTGAGTGAAACAGACTTC	NM_152858.1
ILMN_1789224	0.485786	0.00928	MAP9	-2.87625	-2.55047	-0.807647	88759338	MAP9	AAGCTGCTAAAAGAGAAGAAGCATTAGCATCATTTGAGGCCTGGAAGGCT	NM_001039580.1
ILMN_1804854	0.485786	0.00928	CTNNA1	-2.87614	-2.55067	-0.484113	55770843	CTNNA1	CCTGTGGTAAGCAACCTGGGCATCTTAGGAAGCAGTCCCTGGAGAAGGCA	NM_001903.2
ILMN_2188264	0.486616	0.00933	CYR61	2.87398	-2.55476	1.33972	34222286	CYR61	GAAACTGCCAAGGGTGCTGGTGCGGATGGACACTAATGCAGCCACGATTG	NM_001554.3
ILMN_1705922	0.486616	0.00934	BAIAP2	2.87337	-2.55591	1.12836	5453564	BAIAP2	CCCCCGCCCTTCCCATGTAGCCTGTTCTGTCATCATCTGTGCGTTCCTGT	NM_006340.1
ILMN_1791726	0.486616	0.00935	TUBB3	-2.87299	-2.55663	-1.6379	50592995	TUBB3	TCCTCCCCACCTAGGCCACGTGTGAGCTGCTCCTGTCTCTGTCTTATTGC	NM_006086.2
ILMN_1714567	0.486795	0.00937	AHNAK	-2.87203	-2.55844	-0.449031	61743953	AHNAK	GCAAATTGTCCAACCCACCCCCTCAACATGAGGGGCTTCCATTTTCTGTG	NM_001620.1
ILMN_2380946	0.488478	0.00941	EIF4G2	-2.86969	-2.56286	-0.886015	111494227	EIF4G2	ATGGGCTTTATGTGCTAGATTTTAATATCCTTGAGCCTGGGCAAGTGCAC	NM_001418.3
ILMN_2180773	0.488495	0.00945	FAM168A	2.86813	-2.56582	1.42471	124358903	FAM168A	GAGGAGCGGTGCTTGCCTCATGGCTTTGGTTTGAAAGGTCTCTGGCCAAA	NM_015159.1
ILMN_1718770	0.488495	0.00945	FLJ36070	-2.8681	-2.56587	-1.57457	32698969	FLJ36070	GCAACTGCCTTAACTTTGCCTACCTGGCCTCCTTATGATCCCCCTCCGGC	NM_182574.1
ILMN_1706610	0.489002	0.00948	PLEKHA9	-2.86661	-2.56868	-1.33152	7705683	PLEKHA9	GAGGTCCATGGGCTGGAATCTGATGAGGTTGTATGATGGCTGCTGGGCAG	NM_015899.1
ILMN_1745533	0.489002	0.0095	FAM117A	2.86549	-2.57079	0.66365	31543088	FAM117A	GGAGCTGACCAAAGCAGCCCTAACGGGCCATAACACTTGACCAATTCAGC	NM_030802.2
ILMN_1708845	0.489002	0.00951	MTNR1A	2.86527	-2.57121	1.37745	60498974	MTNR1A	GCCAGGGTGTTCTTTGTGGACAGCTCTAACGACGTGGCCGATAGGGTTAA	NM_005958.3
ILMN_1687940	0.4898	0.00954	FOXO3	2.86376	-2.57407	1.34789	146260266	FOXO3	TCTGCTGCGCCAGGTTCGCTGGCCGCACGTCTTCAGGTCCTCCTGTTCCT	NM_001455.3
ILMN_1675788	0.489982	0.00956	ZNF175	-2.86281	-2.57586	-0.595817	37594438	ZNF175	ACACCAGGAGTCAACAAACTGTGGCCATTGGCCAAATATGGCCTCCCAAC	NM_007147.2
ILMN_1672526	0.490247	0.00958	LOC389834	-2.86178	-2.57779	-0.607067	61966764	LOC389834	CCATTGGTTCTGTTTGGCATAACCCTATTAAATGGTGCGCAGAGCTGAAT	NM_001013655.1
ILMN_1686989	0.490476	0.0096	INSIG1	2.86079	-2.57966	1.01647	38327528	INSIG1	GATACCCTTCTGTGAGGAGTTGAATTTGAAGACCACTTGGCTGTTTCACA	NM_198336.1
ILMN_2234710	0.491329	0.00965	C12orf60	2.85855	-2.58389	0.577529	31343594	C12orf60	GTCACCACATCTGAGAGAACCAGAAGTCCTCCAGGTTCTTCCAAAACCAC	NM_175874.2
ILMN_1654552	0.491329	0.00965	MRPS31	-2.85846	-2.58407	-0.623203	16950599	MRPS31	CGCCACTTCATGGAGCTGGTGACTTGTGGCCTTTCCAAAAACCCATATCT	NM_005830.2
ILMN_3307668	0.49168	0.00968	MKRN3	2.85736	-2.58614	0.886309	189181669	MKRN3	GCCTTAACAAATGGACCCTTGCAGGGCTTTGCAGCTGCTCATCTGTTTGT	NM_005664.3
ILMN_1663532	0.493255	0.00974	RIC8B	-2.85427	-2.59196	-1.10465	95113665	RIC8B	ACTAGACAGTGGGCCTAGCTCATCAGTGGCTAAAGTTGAAAAGGGGTTGG	NM_018157.2
ILMN_1672662	0.493255	0.00975	SLC20A1	2.85405	-2.59239	0.929757	31543629	SLC20A1	CATGCTCTGCGTTGTTGGTTTCACCAGCTTCTGCCCTCACATGCACAGGG	NM_005415.3
ILMN_1758102	0.493255	0.00976	LOC643853	2.85347	-2.59347	1.26685	88961439	LOC643853	ACCTGTTTTCAGCTTTGGAAGGTGGTGGTTCTGGCATTTCTGGCCCTGGC	XM_929395.1
ILMN_3245599	0.493255	0.00981	SNORD109A	2.8514	-2.59738	0.808793	30089683	SNORD109A	CGATGATGAGAATAATTGTCTGAGGATGCTGAGGGACTCATTCCAGATGT	NR_001295.1
ILMN_1659976	0.493255	0.00982	CLP1	2.85079	-2.59852	0.602415	5803028	CLP1	CCTAGAGGCAGATGGGCTGAGATAAAAGACTGTTGGGGCCACCTGACCAG	NM_006831.1
ILMN_1755405	0.493255	0.00986	FRAG1	-2.84877	-2.60233	-0.588129	7657101	FRAG1	TGGGATAGAGGGGTCAGATGCAGATCTCTACTGTAAAATGGGCTCCCTGG	NM_014489.1
ILMN_1661197	0.493255	0.00987	CLCF1	2.84865	-2.60255	1.47677	50726992	CLCF1	CCAGTATTACGGTGCCTCTTCTCTGCCCCCTTTCCCAGGGTATCTGTGGG	NM_013246.2
ILMN_3242676	0.493255	0.00989	TMEM233	2.84749	-2.60474	1.27228	211904184	TMEM233	TTTCCAAATAGGCCCCCTCCCTTGCTTGCATCCACGTTGGTCAACTTGAC	NM_001136534.1
ILMN_1652749	0.493255	0.0099	ERF	2.84713	-2.60541	0.701104	5729813	ERF	CATGGGCCACAAATCTCTACAAGTGCCTGCTATCCCTCTCCCACTCCCCA	NM_006494.1
ILMN_1697652	0.493255	0.00992	PLEKHB2	2.84642	-2.60675	0.850419	8923679	PLEKHB2	GGCAAGGCCGATGGCTCAGGATGATGGGGCACAGCCCGCCTTTGAACAAT	NM_017958.1
ILMN_2289840	0.493255	0.00992	SERHL	2.84619	-2.60718	1.02053	25006531	SERHL	CCCCTGGGAGGCCTCCAAGTCCCTAAGCGGTTCCAGTTTGTGGAAGTCCC	NM_170694.1
ILMN_2054928	0.493255	0.00993	XPNPEP3	-2.84597	-2.6076	-0.926865	38195085	XPNPEP3	AAAAAATGATTTCTGGCCGGGCGTGGTGGCTCAAGCCTGTAATCCCAGCA	NM_022098.2
ILMN_1789846	0.493255	0.00993	ITGB6	-2.84594	-2.60765	-1.42276	9966771	ITGB6	GCAGAACGATCAAAAGCCAAGTGGCAAACGGGAACCAATCCACTCTACAG	NM_000888.3
ILMN_2381945	0.495255	0.01	FGA	2.84283	-2.61351	0.863997	70906433	FGA	GGCCGGAAGTGAAGCCGATCATGAAGGAACACATAGCACCAAGAGAGGCC	NM_021871.2
ILMN_1685403	0.495255	0.01	MMP7	-2.84194	-2.6152	-1.46829	75709180	MMP7	GCTCACTTCGATGAGGATGAACGCTGGACGGATGGTAGCAGTCTAGGGAT	NM_002423.3
ILMN_2140559	0.495255	0.01	IRX5	-2.84185	-2.61536	-1.19964	47778932	IRX5	GAGCCACTCATTACTTTTTAGAAGCCTCAATAAACTGTCCATTGCCTTGG	NM_005853.4
ILMN_1695311	0.49984	0.0101	HLA-DMA	-2.83625	-2.62591	-1.0737	18765714	HLA-DMA	CCAGAGTGGCCTGCCTATCACAACCACATCCCTTCCCCCCACAAGGCAAT	NM_006120.2
ILMN_3223181	0.49984	0.0101	SEC13	2.8362	-2.62599	1.2742	210032389	SEC13	AGCTGCTCCCAGGATGGTCGTGTGTTCATTTGGACCTGTGATGATGCCTC	NM_001136232.1
ILMN_1712517	0.499868	0.0102	ZNF696	-2.83542	-2.62745	-0.712559	13569857	ZNF696	ATCGCGTTGGTGTCTGAGAGGGAGTTGGAGAGCTGGTTGGTGTGGAGGGA	NM_030895.1
ILMN_2372011	0.499922	0.0102	SCAND1	2.83462	-2.62896	1.63466	15967155	SCAND1	AGAAACTGGAAGGAGCCGGTTCGAGCTCAGCCCCTGAGCGTAACTGTGTG	NM_033630.1
ILMN_2176931	0.503156	0.0103	PELI3	-2.83097	-2.63582	-1.36699	21450833	PELI3	CAGGCTCAGGTGTCAGTAAGCCAGAAATCCAGGGACAGAGTCAGGATGGC	NM_145065.1
ILMN_1756826	0.504465	0.0103	MORN2	2.82811	-2.64121	0.690629	34915991	MORN2	AGAGCTGGCCGCCCAGGGGGAGTCGCAGAGTTTGGAAGATCTCTCTAACA	NM_194270.1
ILMN_2373592	0.504465	0.0104	PCDHAC2	2.827	-2.64329	0.960317	14717399	PCDHAC2	GACTGACAGCAGGAATCTCACAGGCCAAAGTGGTCAGAATGCTGGGAACC	NM_031883.2
ILMN_1804652	0.504465	0.0104	PLEKHH3	-2.8261	-2.64499	-0.717085	40255046	PLEKHH3	TGGGCCAGGACTGCTCTGAGATTTGAGGGAAACATGGACCCTTTTGGCCC	NM_024927.3
ILMN_1695763	0.504465	0.0104	PDIA5	2.82589	-2.64537	1.09718	142361691	PDIA5	GGTCATGTTCTACGCCCCTTGGTGCCCACACTGTAAGAAGGTCATTCCGC	NM_006810.2
ILMN_1779010	0.504465	0.0104	MAP3K3	2.82556	-2.64599	0.525112	42794766	MAP3K3	TGACTCAACTGTGCGTCCCAGGTTCAGGGTCTTACAGAGCTCCACCCCCT	NM_203351.1
ILMN_2323007	0.504465	0.0104	CDH26	-2.82532	-2.64644	-0.599256	29570801	CDH26	TATAACCCATAGATTACCCAGCCACTTGGGAACAGCAGGTAATACTGAAG	NM_021810.3
ILMN_1668246	0.504563	0.0104	TMEM52	2.82449	-2.648	0.874104	31341734	TMEM52	AGTCGGGCCCCAATACTCAACTACCACCTTGTAGCCCTGGTGCCCCTTGA	NM_178545.2
ILMN_1742541	0.504666	0.0104	ZNF518A	-2.82366	-2.64957	-0.858565	117190511	ZNF518A	GTTTACATATGTCAACTGTAACAGTAGGTCCCAAATGGGCCCATTCCCCT	NM_014803.3
ILMN_1677452	0.504948	0.0105	REXO4	-2.82237	-2.65198	-0.670177	76781491	REXO4	GTGGCACTGACAAGGGGACGGAGTCCAAGGCGTTATTGGGCCACCTGACA	NM_020385.2
ILMN_1769694	0.504948	0.0105	ACCN2	-2.82193	-2.65282	-1.22734	21536348	ACCN2	CCTCCCCAGAGGGAAGCAGGAATGAGGCCAAAAAGTGTGCATTGGATAGG	NM_001095.2
ILMN_1671005	0.506277	0.0105	IRF2BP2	2.81905	-2.65822	0.603941	116734703	IRF2BP2	CACTACCAGGAGGAATAGCAACAGTCCGCCCTCTCCGTCCTCTATGAACC	NM_182972.2
ILMN_1769997	0.506277	0.0105	NFATC1	2.81889	-2.65851	1.27143	27502385	NFATC1	TGGCCCCTATTCCTGTAACGGTCAAGCGAGAGCCTGAAGAGTTGGACCAG	NM_172387.1
ILMN_1728369	0.506277	0.0106	CLCN4	2.81763	-2.66088	1.2566	153252025	CLCN4	CCCCAGAGACGCTCAGCTTGTATCCATTGACTGGAAGTCTGTCACGTGGC	NM_001830.3
ILMN_1803570	0.506277	0.0106	BRI3BP	2.8168	-2.66243	1.16475	40548423	BRI3BP	TCAACACCTTCTCCCAGAGCGTCAGCAGCCTGTTCGGCGAGGACAACGTG	NM_080626.5
ILMN_2362126	0.506277	0.0106	AGAP3	2.81638	-2.66323	1.43265	110227616	AGAP3	ACCCCCACACCCATCCGAAAGCAGTCCAAGCGGCGCTCCAACATCTTCAC	NM_001042535.1
ILMN_2255133	0.506277	0.0106	BCL11A	-2.81568	-2.66453	-1.41637	20336304	BCL11A	GGCAGTTGTCTGCATTAACCTGTTCATACACCCATTTTGTCCCTTTATTG	NM_022893.2
ILMN_1735004	0.506277	0.0106	C4orf43	-2.8156	-2.6647	-1.02651	153251296	C4orf43	AGAGGTAGGTTTTATTTGTGGAGAGAGAGTTGAAGATTAGGGAACCAGTG	NM_018352.2
ILMN_1720794	0.506348	0.0107	SNORD4B	2.81409	-2.66753	0.547431	22546006	SNORD4B	GCGACCAAAGCCTGATCTTTGCTGATTAGTCATAATTAACTGACTGCACC	NR_000009.1
ILMN_2215061	0.506348	0.0107	ORC6L	-2.81374	-2.66819	-0.713346	32454755	ORC6L	TGCACCACCGCACTCCAGCCTGGGTGACAGAGCGAGACTTATCTCATAAA	NM_014321.2
ILMN_2414878	0.506348	0.0107	STXBP1	2.81268	-2.67017	0.955424	73760414	STXBP1	CGTTGGACTCACACAGACCCTGTACCCTCTCGGCAAGCATCTTCAGTCAG	NM_001032221.1
ILMN_1794165	0.506348	0.0107	PGD	2.81262	-2.67028	0.999065	40068517	PGD	CTGCTCCTGTCACCCTCCACGATTCCACAGACCAGGACATTCCATGTGCC	NM_002631.2
ILMN_2333146	0.509053	0.0108	BCR	2.80949	-2.67615	1.06557	82546844	BCR	CTATGAGCGTGCAGAGTGGAGGGAGAACATCCGGGAGCAGCAGAAGAAGT	NM_021574.2
ILMN_2147251	0.509064	0.0108	MGC10997	-2.80796	-2.67902	-0.835055	34610204	MGC10997	CTTCTGCCATGATTGTGAGGCCTCCCCAGCCATGTGGAACTGTGAATCCA	NR_001565.1
ILMN_1806937	0.509064	0.0108	C19orf62	-2.80717	-2.68051	-0.647925	75709191	C19orf62	CCTTGGCCTAAAGCCTTGGTTCTCAAACTGGGTTCCTTGGGACCTCCGGG	NM_014173.2
ILMN_1678423	0.509064	0.0109	SPA17	-2.8059	-2.68288	-0.576319	15718773	SPA17	CTGTCAAAATCCAAGCTGCCTTCCGGGGACACATAGCCAGAGAGGAGGCA	NM_017425.2
ILMN_2357542	0.509064	0.0109	VIP	-2.8053	-2.684	-1.01738	37588851	VIP	CTTCGGCATGGCCTCTTTACAGGGCACCTTCTGCTCTCAGGTTGGGTGAC	NM_003381.2
ILMN_1699190	0.509064	0.0109	SORCS1	2.80495	-2.68465	0.935806	61743974	SORCS1	TCTGAAAGCAGGCCCAATGTCCCTCAGACTGAACTAAGGAGGCCTGGCCA	NM_001013031.1
ILMN_2359907	0.509064	0.0109	CD68	-2.80351	-2.68735	-1.18066	91199547	CD68	CAGTGAGCCGTCATCGCGCCACTAAGCCAAGATCGCGCCACTGCACTCCA	NM_001251.2
ILMN_1734472	0.509064	0.0109	PEBP4	2.80341	-2.68755	0.986838	116812621	PEBP4	AAGATCACCTCCTGGATGGAGCCGATAGTCAAGTTCCCGGGGGCCGTGGA	NM_144962.2
ILMN_1687524	0.509064	0.0109	KBTBD4	2.80332	-2.68771	0.616552	32189315	KBTBD4	TCCCTCCCCATACAAACTCAAAGTCCCCTGGGCCCCAATTCAGAGTTATG	NM_018095.3
ILMN_1814494	0.509064	0.0109	SEMA6D	2.803	-2.68831	0.810472	24234743	SEMA6D	CTCTGTCATTCATCAAATCTCATCCCCTGATGGACTCTGCCGTTCCACCC	NM_153619.1
ILMN_3245554	0.5105	0.011	SNORD1B	2.80067	-2.69267	0.622575	161087016	SNORD1B	CCCTGTCTGAAGGCAAAGAAAGGCCTTTCTGTGTGGAATTTGAATATCTG	NR_004396.1
ILMN_2125747	0.5105	0.011	LOC606724	-2.7997	-2.69448	-1.80444	73760411	LOC606724	GAGGAGATGCGGAAGCTCCAGGCCACGGTGCAGGAGCTCCAGAAGCGCTT	NR_002454.2
ILMN_1757825	0.5105	0.011	ZNF230	2.7982	-2.6973	1.00277	110624766	ZNF230	CCCTGTTGCACTTGGCTGCTGGCTTCCCCTCATCCTCTGTTCTGAAGTTT	NM_006300.3
ILMN_2105966	0.5105	0.011	SLC35A4	2.79819	-2.69731	0.623365	39725666	SLC35A4	TAAGCCGACACTCCTGACCTCTCTGTTCACCCTGAGGGCTGTCTTGAAGC	NM_080670.2
ILMN_2307861	0.5105	0.011	COL6A3	-2.79816	-2.69737	-1.0341	55743097	COL6A3	CCTATCAATCCAAATTCCCTCTGGAGTTTCATGTTATGCCTGTTGCAGGC	NM_004369.2
ILMN_1661138	0.510511	0.0111	GON4L	-2.79595	-2.70151	-1.02756	82830423	GON4L	GGAGAGGAAACAGAGACCTGTAGATGGATGATTATTCTGCCCTGGGACTC	NM_001037533.1
ILMN_1763328	0.510511	0.0111	GZF1	2.79587	-2.70166	1.11454	40807461	GZF1	CTGAGTGGATTGGTCCCAAGTGTGTAATGAGGAAAGTGGCCAGGTGCCGG	NM_022482.3
ILMN_2350574	0.510511	0.0111	MYADM	2.79583	-2.70174	0.555756	66932921	MYADM	TCCTGGCCATGAGGACAAAAATTACTGAGTGGCCCTTAAAGAGGGAAGTT	NM_138373.3
ILMN_2095660	0.510511	0.0111	TMEM156	-2.79514	-2.70302	-1.46957	13376422	TMEM156	AACCAAGATCACGCCACTGCATTACAGCCTGGTGCAGAGCAAGACTCTGT	NM_024943.1
ILMN_1720829	0.510511	0.0112	ZFP36	2.7909	-2.71095	0.885245	141802261	ZFP36	CCAGTGTCTCCTGGTAACTGGAACCTCTCCTGAGGGGGAATCCTGGTGCT	NM_003407.2
ILMN_1791637	0.510511	0.0112	TSSK6	2.79047	-2.71175	0.727934	51477706	TSSK6	GAGACCAGAGGGGACGGAAGCATTGCGCCTGCGCGGAACTCTCAGCCTCT	NM_032037.2
ILMN_3308113	0.510511	0.0112	SNORD115-48	2.79036	-2.71197	0.601504	126032314	SNORD115-48	AGAGAAATGATGACGTAAAAATTAAGTTCAGTTGGATTACGCTGAGGCCC	NR_003362.1
ILMN_1788711	0.510511	0.0112	HSN2	2.79031	-2.71206	0.517507	47458035	HSN2	CAGCTGCACCTTTTGGCTCTGACGTCTCAATGCCCTTTATCCATCTGCCT	NM_213655.1
ILMN_1691409	0.510511	0.0112	SEC31A	-2.78986	-2.71289	-0.463186	41349438	SEC31A	GACCAAGTAGCACAGAGTGATGGGGAGGAGAGCCCTGCTGCTGAAGAGCA	NM_014933.2
ILMN_1692779	0.510511	0.0113	PRPF39	-2.78873	-2.715	-0.463109	33946298	PRPF39	GCCTTAAGGGGTAGGAAGAAAAACCTGACTGCAAATCATGTCAGTGTAGT	NM_017922.2
ILMN_1744665	0.510511	0.0113	EP300	2.78862	-2.71522	0.733165	50345996	EP300	GTGCAAGCGCCACGGACCTGGGACTCAGCACCGATAACTCAGACTTGAAT	NM_001429.2
ILMN_1703648	0.510511	0.0113	TMEM82	2.78767	-2.71699	1.48324	61966730	TMEM82	TGGAGTCTGTCTCAAGCCCACTAGCCTGATCTCCGAGGCCTTGACCCCAG	NM_001013641.1
ILMN_2293992	0.510511	0.0113	RAB28	2.78697	-2.71831	0.675938	63029938	RAB28	GCTGCCCTTCACCTCTGGGTGGGCCCGAGGACTTCTAGGAACTTGTTTTA	NM_001017979.1
ILMN_1776845	0.510511	0.0113	HIST1H3A	2.78689	-2.71846	0.950789	19743828	HIST1H3A	CTCTGCGCGAGATCCGCCGTTATCAGAAGTCCACTGAACTGCTTATTCGT	NM_003529.2
ILMN_3224934	0.510511	0.0113	SFRS18	-2.7864	-2.71936	-0.398862	154146192	SFRS18	CAGATCAACAACCCCTCCCCGTCGTAAACGCTGAGGAATGATGTGGCAAG	NM_032870.2
ILMN_1736575	0.510511	0.0113	TRIM28	2.78623	-2.71969	0.459894	14971416	TRIM28	GAAGTTGTCACCTCCCTACAGCTCCCCACAGGAGTTTGCCCAGGATGTGG	NM_005762.2
ILMN_2371280	0.510511	0.0113	CSF3R	-2.78623	-2.71969	-0.897066	27437044	CSF3R	GACCAGATCATGCTCCATCCAGCCCCACCCAATGGCCTTTTGTGCTTGTT	NM_172313.1
ILMN_2218856	0.513114	0.0114	CCL3L1	2.78324	-2.72527	0.697212	48949814	CCL3L1	GTCTGTGCTGACCCCAGTGAGGAGTGGGTCCAGAAATACGTCAGTGACCT	NM_021006.4
ILMN_3251383	0.514958	0.0115	CCDC74B	-2.78065	-2.73011	-1.29926	46409265	CCDC74B	AGAAACGGCGCCTGCATCGCTCGGTGCTTTGAGCTACCCGCATCTGGTCA	NM_207310.1
ILMN_2408987	0.514958	0.0115	SMARCD3	-2.77964	-2.732	-1.54725	51477703	SMARCD3	CGGGACCTCAAGGTGATGACAGATGTAGCCGGCAACCCTGAAGAGGAGCG	NM_001003802.1
ILMN_1655924	0.514958	0.0115	TRNT1	-2.77955	-2.73217	-0.938917	41281989	TRNT1	CCCCAGTTGCTGGCATTCATATGTACAGGATTTGTTCTAGCAAGCTATGC	NM_182916.1
ILMN_2352881	0.518678	0.0116	NR6A1	2.77551	-2.73971	1.11329	53729326	NR6A1	GGGGAACTGGCTGATGTCACTGCCAAGTACTCGCCCTCCGATGAAGAACT	NM_001489.3
ILMN_2196078	0.518678	0.0117	SLAMF6	-2.77332	-2.74379	-1.34211	38327616	SLAMF6	GGTGGAGGTTCCAGTGAGCCAAAATCATGCCAATGTATTCCAGTCTGGGT	NM_052931.3
ILMN_2413318	0.518678	0.0117	C15orf57	2.77315	-2.74409	0.959383	124248540	C15orf57	TGGGGCTGGCATGTGTGACTGTCTCGGATGAAGTGACTGACCCAGTGCAC	NM_001080791.1
ILMN_1679301	0.518678	0.0117	ZFAT	2.77305	-2.74429	1.32056	46487910	ZFAT	CACCATCACACATCAGCCTGACTCTTGCAAAGCTGCCCCTGAGCACCGGT	NM_020863.2
ILMN_1701852	0.518678	0.0117	ZNF44	-2.77286	-2.74465	-0.654218	56676339	ZNF44	GCCTTTTATTGTTGCAGTTCTGCCCGAAGACATGAAAGGATGCACACTGC	NM_016264.2
ILMN_1667452	0.520192	0.0117	LOC441208	-2.77055	-2.74895	-0.65411	134288913	LOC441208	TAGTACCAGGAAGTCAGGAGGAGACGGTTGCTAAATGTAGTTCTATCTGG	NR_003502.1
ILMN_1808226	0.520192	0.0117	RGS16	2.77017	-2.74965	1.1203	34452689	RGS16	CCCAGGGCAGCCCCTTTGTGGCCCAGGATAATCAACACTGTTCTCTCTGT	NM_002928.2
ILMN_1727156	0.522026	0.0118	ARSI	2.7679	-2.7539	0.708626	59797059	ARSI	CCAGTGTCCGCCAGGCCGTGTGGCTCTTCAACATCAGTGCTGACCCTTAT	NM_001012301.1
ILMN_1699520	0.523205	0.0119	SLC8A1	2.76446	-2.7603	1.31087	115529447	SLC8A1	CCGGACTGCCAAGCTCCTCACATCCTGCCTCTTTGTGCTCCTATGGCTCT	NM_021097.2
ILMN_1671731	0.523205	0.0119	AVPI1	2.76438	-2.76045	0.483952	11119427	AVPI1	ACTGTAAACCATGGTTCCAGCAGCCTGTTCCACACCCCCACACCATCAGG	NM_021732.1
ILMN_1682941	0.523205	0.0119	C18orf25	2.76428	-2.76064	0.8572	116292176	C18orf25	GAGCACAGTAATTCTGTAGGCGGCCAGGACACAGGAGCTACCTGGAGGAC	NM_145055.3
ILMN_1683927	0.523205	0.0119	ITGAE	-2.764	-2.76116	-0.610316	148728187	ITGAE	GAACTTGGAGAGCATCAGGAAGGCCCAGCTGAAATCAGAGAATCTGCTCG	NM_002208.4
ILMN_1667453	0.523205	0.0119	HINFP	-2.76277	-2.76345	-1.03935	39725947	HINFP	AGGCCCAAGGATGGCATGTGACTGGTCCCTGCAAGGGTCCTTTCTTTGTC	NM_015517.3
ILMN_1721636	0.523205	0.012	TSC22D4	2.75965	-2.76927	0.996923	37059797	TSC22D4	CGGCCTTGCGTCAGCCGCCTGCCCCCTCTTCCTATGCAGCTTTAATGTCC	NM_030935.3
ILMN_2207505	0.523205	0.012	LEP	-2.75878	-2.77088	-0.841885	4557714	LEP	CGGGAGGCTGAGACAGGAGAATCGCTTAAACCTGGGAGGCGGAGAGTACA	NM_000230.1
ILMN_1777060	0.523205	0.0121	CTH	2.75807	-2.7722	0.894751	34328937	CTH	GAAACCCCCACAAACCCCACCCAGAAGGTGATTGACATTGAAGGCTGTGC	NM_001902.4
ILMN_2054442	0.523205	0.0121	ZNF146	-2.75669	-2.77476	-0.828206	6005965	ZNF146	CTCAAAATAGGAATGGGAGTGAGGATGGGAATGCTGTATCTGTGGAAGTC	NM_007145.1
ILMN_1747577	0.523205	0.0121	ALAD	2.75532	-2.77731	0.707436	51558758	ALAD	GGCCTCTGCCCCTAACCACTGTGCCATACCACCTCCCAATAATCAACAGC	NM_001003945.1
ILMN_1772074	0.523205	0.0121	C19orf51	-2.75486	-2.77817	-1.73508	73476318	C19orf51	TGAGTCTCAGGCCCTTGACTTTGGCCCCCTTGTTCCCAGGCACCCTGTGG	NM_178837.3
ILMN_2329625	0.523205	0.0122	PCDH11X	2.75378	-2.78019	0.646725	21735589	PCDH11X	CGAAGCACCACATCATCCAAGAACTGCCTCTCGATAACACCTTTGTGGCC	NM_032968.2
ILMN_2324202	0.523205	0.0122	GABRE	-2.75308	-2.78149	-0.864209	52426760	GABRE	GGGGCCAAGAAACTAAGGAAACTCGGCTTTGCAACAGGCATTACTCGCCA	NM_004961.3
ILMN_3236765	0.523205	0.0122	UPLP	-2.75237	-2.7828	-0.647958	167555122	UPLP	CCCAAAGCTTGTGCCAGTCTCTATCAGAAATAAATGCCCCCAAAACCTCA	NM_001114403.1
ILMN_2391400	0.523205	0.0122	PITX2	-2.75182	-2.78383	-1.22312	24234710	PITX2	GGGCAACTCCGCCCTTGAAAGACTGGGAATTATGCTAGAAGGTCGTGGGC	NM_153427.1
ILMN_1786872	0.523205	0.0123	C11orf31	2.75099	-2.78537	0.856638	46370090	C11orf31	GGACAAAGCCAGCCTTGTGGAGTTGGTAGTCCTTGTGTTTTTCATAGCCC	NM_170746.2
ILMN_1715169	0.523205	0.0123	HLA-DRB1	-2.74981	-2.78756	-1.768	4504410	HLA-DRB1	GGACTTCAGCCAACAGGATTCCTGAGCTGAAATGCAGATGACCACATTCA	NM_002124.1
ILMN_1695549	0.523205	0.0123	PVRL1	2.74962	-2.78792	0.92967	42560230	PVRL1	GGCCACCAACCCCATCGGTACACGCTCAGGCCAGGTGGAGGTCAATATCA	NM_203285.1
ILMN_1790160	0.523205	0.0123	KIT	2.74926	-2.78859	1.67392	148005038	KIT	GCCGTTATCTGGAAGTAACCATTTGCACTGGAGTTCTATGCTCTCGCACC	NM_001093772.1
ILMN_2094332	0.523205	0.0123	CYorf15B	-2.74888	-2.7893	-0.847338	50355980	CYorf15B	CTCTAAAAGAGCCCCAGGAGTCCATCTGGAGGCTGACCCCAAAGGAATGA	NM_032576.2
ILMN_1760303	0.523205	0.0123	PIK3R1	-2.74887	-2.78932	-0.623589	32455247	PIK3R1	TGACGAGAGGGAGGATGTCACGGTCAGTTGTAACTTTGCCTTCACAAGGC	NM_181523.1
ILMN_2125010	0.523205	0.0123	SKAP2	-2.74869	-2.78965	-0.640363	38202227	SKAP2	GATCTCCACCGGCCTTTGTTCTTTTAAAACTTGAATATAGGTGGGAGACA	NM_003930.3
ILMN_2227120	0.523205	0.0123	KIF5A	-2.74804	-2.79086	-1.43783	45446748	KIF5A	CTACTCGTCTCACACTGAGTGGTGTTAGTCACTGAGTAGAGGTCACAGAG	NM_004984.2
ILMN_1702970	0.523205	0.0123	NLRP6	2.74802	-2.7909	1.61603	21264319	NLRP6	TGTGGAGCTGAGCGAGCAGTCACTACAGGAGCTTCAGGCTGTGAAGAGAG	NM_138329.1
ILMN_2057566	0.523205	0.0123	PGP	2.74774	-2.79141	1.11727	116642883	PGP	TAAGTTGGCTCAAGCCGGGTCTGGCCTGACAGGGTGCAGTCACACCAGGA	NM_001042371.2
ILMN_1686679	0.523205	0.0124	ZNF462	-2.74714	-2.79252	-0.987954	114431235	ZNF462	GTGCACCCTGTGGTGGTCTTGGACAGTATGTGGAAACAGAAGCTCCATGA	NM_021224.4
ILMN_1745686	0.523205	0.0124	MFHAS1	2.74697	-2.79285	0.645788	110825983	MFHAS1	GGAATGGCCTGGACTGCACTACACCGTGCACATTCTCTGTTCTAAGTGCC	NM_004225.2
ILMN_1722502	0.523205	0.0124	CCT6A	-2.74632	-2.79405	-0.397721	58331170	CCT6A	ACAGGCAGAGGTAAAAAGATGATGGAAGGTGTGGTGACTAAGGGCCACGG	NM_001009186.1
ILMN_1726107	0.523205	0.0124	UBE2V1	2.74613	-2.7944	0.944987	73765545	UBE2V1	GAAGAAGGGGCCGGCCTTCAAGCAAGAGCGACGCAAGATGGCAGCCACCA	NM_001032288.1
ILMN_1733462	0.523205	0.0124	HSD3B2	2.74522	-2.7961	0.996323	50726973	HSD3B2	AATGTCATCAAACTCCACCCACCTGGCTTCATACAGAAGGCAACAGGGGC	NM_000198.2
ILMN_2412564	0.523205	0.0124	NCBP2	2.74504	-2.79644	0.76024	110349728	NCBP2	TCGGCAGGACTACGATGCTGGGAGAGGAGGCTATGGAAAACTGGCACAGA	NM_007362.3
ILMN_1651681	0.523205	0.0124	WDFY3	2.74437	-2.79768	0.784448	31317269	WDFY3	TCTTTTTCCCTGTACTTTGAAACAGCCATTGTGTGCAGGCAGCCCGCTGC	NM_178585.1
ILMN_2208802	0.523205	0.0124	NPIP	-2.74384	-2.79866	-0.420359	5902013	NPIP	CTGGCCCTACCTCACAGCTGAAACTTTAAAAAACAGGATGGGCCACCAGC	NM_006985.1
ILMN_1781812	0.523205	0.0125	NR4A3	2.74364	-2.79903	1.65797	27894358	NR4A3	GAGAACTGGGATGGAACGCCACCTCTGCTACTTCCTGCCTGTGTCACCTG	NM_173199.1
ILMN_1801928	0.523205	0.0125	YWHAZ	2.7436	-2.7991	0.372717	21735623	YWHAZ	GGCACCCTGCTTCCTTTGCTTGCATCCCACAGACTATTTCCCTCATCCTA	NM_003406.2
ILMN_1764867	0.524734	0.0125	LOC649431	2.74132	-2.80333	0.888388	88981251	LOC649431	TGAATGTTGCCGTGCTCCAATTGGCCCATAGGCCGAAGTTTTTGGACTCC	XM_943707.1
ILMN_1776936	0.524734	0.0125	ANKRD38	-2.74098	-2.80397	-0.630582	142373862	ANKRD38	ATTCCCTGGGGCCAGCACATGCAAGGTTTATATGGTCAGTAGCTCACGTG	NM_181712.3
ILMN_3236965	0.525421	0.0126	LOC100129387	-2.73974	-2.80627	-0.886538	213513047	LOC100129387	CAAGAACAGTGTGAGACCAAAGGGAATAGCTGGGCAAAGGCCCTAAGGTG	NR_024490.1
ILMN_2043007	0.52642	0.0126	DDI2	2.73812	-2.80928	1.15293	62955832	DDI2	AAATCAGCAGAGGATGCAGAGCGTCAGAAGCCATGATGCATGTAGTGTGT	NM_032341.3
ILMN_1813028	0.52642	0.0126	CBX5	-2.73759	-2.81027	-0.452519	6912291	CBX5	TCAGAGGATGAGGAGGAGTATGTTGTGGAGAAGGTGCTAGACAGGCGCGT	NM_012117.1
ILMN_1810805	0.526678	0.0126	HEATR5B	2.73656	-2.81219	0.593515	55749741	HEATR5B	GGCTGCCAGACAACCAGCCCCCGCCATACATTCTGCACCAACAATTAAGC	NM_019024.1
ILMN_3307841	0.526678	0.0127	AGR2	-2.73565	-2.81387	-1.44545	219521822	AGR2	GGCCTTGAGACTTGAAACCAGAAGAAGTGTGAGAAGACTGGCTAGTGTGG	NM_006408.3
ILMN_3243223	0.526678	0.0127	FLJ41562	-2.73543	-2.81427	-1.07832	194018583	FLJ41562	GACTTTTGTTCATGTTGCCCAGGCTGGTGTGCAGAGGTGCGGTCTCGACG	NM_001129907.1
ILMN_1710434	0.526922	0.0127	TBC1D10C	-2.73458	-2.81585	-1.82613	48762676	TBC1D10C	CCGTGGTACATACTGGGTCAGGCACTAGCATGGAGGAGGGTCACAGAGTG	NM_198517.2
ILMN_1784113	0.527497	0.0127	NAT14	-2.73345	-2.81795	-0.63761	34147337	NAT14	CTGGGACCTGGATTGGGTCAGATGCCTGTCCTTGGAGGGGACAAGGTTGA	NM_020378.2
ILMN_1664047	0.527672	0.0128	CACNA1E	2.73265	-2.81942	1.29093	53832004	CACNA1E	CACTGCAGATGCGGTCACCTGACTGACCACCTGGGTTTTCTATTACCAGT	NM_000721.2
ILMN_1788019	0.530186	0.0128	LAMA2	-2.72986	-2.82461	-0.671301	119466531	LAMA2	GGCCCCTGCCGATCTGGAACAACCCACCTCCAGCTTCCATGTTGGGACAT	NM_001079823.1
ILMN_1740169	0.53077	0.0129	TYRO3	2.72845	-2.82721	1.53886	27597077	TYRO3	CGGTGACCTTTAGTGCCAACTTCCCCTCTAACTGGACAGCCTCTTCTGTC	NM_006293.2
ILMN_2335718	0.53077	0.0129	HNRNPAB	2.72808	-2.8279	0.394451	55956920	HNRNPAB	GCGGCAGCAGGAGCGACCAACTGATCGCACACATGCTTTGTTTGGATATG	NM_004499.3
ILMN_1668909	0.53139	0.0129	MAP2K3	2.72688	-2.83013	0.708845	117306181	MAP2K3	GGGACCTTTGGAGCACAGCCTACGATCCTGGTGCAAGGCCGGTGGATGCA	NM_002756.3
ILMN_1652512	0.53139	0.0129	C2CD2	-2.72611	-2.83156	-0.680128	119226221	C2CD2	AGCCTGCACACGGGCTTGGGTGGGTTCCTTTGGAGAAGATGTGGCTGGAA	NM_015500.1
ILMN_1770102	0.53139	0.013	FLJ21687	-2.72545	-2.83278	-1.28767	13376285	FLJ21687	CCCCAACTGTATATGTTGCACTGTGCTAGGTACTGTGGAGATGCTGGAGG	NM_024859.1
ILMN_1661137	0.53139	0.013	SH3RF2	-2.72501	-2.8336	-0.850117	47578102	SH3RF2	CCTGGCTGCAAAGGGAGGATTTCTGCGCGGGGTGTGAGGTGGATACTTTG	NM_152550.2
ILMN_2075962	0.533939	0.0131	DSCAML1	2.7222	-2.8388	0.952269	21359934	DSCAML1	GCCGCAGCCCCACACGCCAGCTCGGCTGTTTTTCTGCATTATTTATATTC	NM_020693.2
ILMN_1752758	0.534355	0.0131	BTN2A2	-2.72065	-2.84166	-1.47611	31881700	BTN2A2	AAACTGAGCCATGCTACCAGCATCCCAGGGTCTCCAGCCTACAGATGAGC	NM_006995.3
ILMN_1790154	0.534355	0.0131	PHF21B	2.72002	-2.84282	0.941544	19923936	PHF21B	CACGGTCCCTCCTGTCATTCTCACGACTCCGGGAGAAACTGTGCTGTATG	NM_138415.1
ILMN_1763000	0.534355	0.0131	ADAP2	-2.71995	-2.84297	-0.836225	93102369	ADAP2	GCTGGGTTGTGCATTAAGGGCCAGTTTACTTGTCTGCCTCTTTGACCACC	NM_018404.2
ILMN_1674250	0.537198	0.0132	NCKAP1L	-2.71561	-2.85099	-1.48106	153792638	NCKAP1L	CAATCCAGGGCTGAGAAATCGTAGAGCAGTGAGGCAGGCTGGGAGCATGG	NM_005337.4
ILMN_1654357	0.537198	0.0133	ZNF24	2.71531	-2.85154	0.89235	5902161	ZNF24	CTCTTCCCCTTGTCTGAGCATTCCTCAGGGGAGGTCACCTGTGAGGTTCC	NM_006965.1
ILMN_1700518	0.537198	0.0133	HMGN4	-2.71521	-2.85174	-0.717434	23238232	HMGN4	CCTCTGTCTCCAGTATCACCACAAAATTGTTCTTCCTTGGAGTGTCTTGG	NM_006353.2
ILMN_2361104	0.537198	0.0133	ZMAT3	-2.71501	-2.8521	-0.687898	23199977	ZMAT3	TAAGATGGATATGATTTCAAAAAATAGGGCCGGGCGCGGTGGCTCACGCC	NM_152240.1
ILMN_1787366	0.537198	0.0133	ZNF335	2.71439	-2.85325	0.899771	40807460	ZNF335	ATCACCCTGGCCGATGACTGAGCCCCGAGGGCCCAACACAGATCATGGAT	NM_022095.3
[truncated: 28,640 more rows]

## Sheet: GSE 116626 matrisome
Supplementary Table 2D. Differentially expression of matrisome defining genes in GSE 116626
[truncated: 1,303 more rows]
