# Supplementary material for: Comparative Analysis of Acute Kidney Injury Models and Related Fibrogenic Responses: Convergence on Methylation Patterns Regulated by Cold Shock Protein
Source: Cells. 2024 Feb 20;13(5):367. doi: 10.3390/cells13050367 (PMC10930537; doi:10.3390/cells13050367)
Supplement: Supplementary file 1 [file cells-13-00367-s001.zip › Supplementary Table S3.xlsx]

## Sheet: whole Matrisome KO-WT
	logFC	logPValue
ABI3BP	-0.534661	0.654959
ADIPOQ	-3.33093	0.639798
AEBP1	-0.60056	0.7656
AGRN	-1.34522	5.02313
AGRN	0.043452	0.0972344
AW551984	-0.226942	0.758876
BGLAP2	0.450116	1.27744
BGLAP3	0.296852	0.546598
BGLAP3	0.845717	2.37331
BMPER	-1.88152	2.59977
CILP	-3.23153	3.077
COLQ	0.23744	0.890849
COMP	0.990639	1.10625
CRELD1	-0.168414	0.391241
CRELD2	-0.0516297	0.0881571
CRIM1	0.247398	0.942071
CRISPLD1	0.599614	3.37062
CRISPLD2	0.206606	0.222128
CRISPLD2	0.352758	0.554535
CTGF	-1.56302	2.80251
CTHRC1	-2.41413	2.64298
CYR61	-1.44772	1.45118
DPT	-1.47658	2.1479
ECM1	0.368927	0.559509
ECM2	-0.0259602	0.0424501
EFEMP2	-1.80388	3.40961
EGFLAM	0.0212384	0.0422884
ELN	-0.266224	0.312059
EMID1	-0.705792	1.75563
EMID1	-0.152054	0.140229
EMILIN1	-1.89703	4.07688
EMILIN2	-1.08539	1.48211
EMILIN3	1.00015	2.68129
FBLN1	-1.70024	2.73419
FBLN1	-0.923416	1.28652
FBLN1	-0.862754	0.665121
FBLN2	-1.81134	1.60108
FBLN5	-0.24977	0.321461
FBLN5	0.0106023	0.0174276
FBLN7	0.268408	0.472041
FBLN7	0.333628	0.452003
FBN1	-2.51782	4.52214
FBN2	-2.22202	3.30569
FGA	-0.154493	0.160831
FGA	0.870514	1.80511
FGB	-2.7685	3.0482
FGG	-1.57875	2.10796
FGL1	-0.19216	0.231449
FGL1	-0.165838	0.141338
FGL2	-2.48703	5.46412
FN1	-2.69972	4.46777
FNDC1	-2.71215	3.78061
FNDC1	-0.827376	1.50273
FNDC1	1.25093	3.23883
FNDC7	-0.109872	0.318433
FRAS1	1.04022	3.88238
GAS6	0.400643	1.86225
HMCN1	-0.321061	0.618275
HMCN2	0.364392	1.00289
IGFALS	-0.563862	0.641267
IGFBP1	1.19446	2.8165
IGFBP2	-0.286033	0.146007
IGFBP2	0.067549	0.0325204
IGFBP3	0.781575	3.2371
IGFBP4	-0.138357	0.15586
IGFBP5	1.10898	1.61578
IGFBP6	-2.50838	1.22708
IGFBP7	-1.03282	2.11416
IGSF10	-1.04133	1.61638
KCP	0.160305	0.379301
LAMA1	0.489317	1.3653
LAMA2	-1.0711	1.99402
LAMA2	-0.699721	1.07629
LAMA3	-0.225193	0.320266
LAMA3	0.00672138	0.00919839
LAMA4	-1.17803	1.96375
LAMA5	-0.133885	0.152268
LAMB1	-0.451742	1.18626
LAMB2	-0.284305	0.554866
LAMB3	-1.89716	3.13375
LAMC1	-0.103277	0.0878819
LAMC2	-0.498641	0.777064
LAMC3	0.681895	1.61117
LGI2	-1.78033	1.62826
LGI4	-0.578238	1.00347
LRG1	-0.568065	0.421536
LTBP1	0.212997	0.230497
LTBP2	-3.25647	2.81889
LTBP3	-1.01339	1.7848
LTBP4	-0.791019	1.25154
LTBP4	-0.366622	0.373082
LTBP4	-0.188763	0.623815
MATN2	-0.719629	1.27475
MATN4	0.46214	1.64926
MEPE	0.376268	1.32466
MFAP1A	-0.0653703	0.147047
MFAP1B	0.404476	1.97351
MFAP2	-1.40142	1.30562
MFAP2	-1.17655	1.98215
MFAP3	-0.281249	0.97293
MFAP4	-2.2952	1.6706
MFAP5	-2.65903	1.89699
MFGE8	-0.126649	0.194459
MMRN1	0.749437	1.27239
MMRN2	0.177954	0.236724
NID1	-1.6952	3.03124
NID1	-0.148482	0.231589
NOV	-0.69698	0.979945
NPNT	-0.155527	0.368891
NPNT	1.06687	2.43913
NTN1	-0.148299	0.29619
NTNG1	0.519939	0.728496
OIT3	-0.256172	0.432787
PAPLN	0.29686	0.959355
PAPLN	0.330452	1.19664
PCOLCE	-0.420562	0.364431
PCOLCE2	-1.02349	3.10651
POSTN	-3.28761	2.64635
PXDN	-1.47436	2.62898
PXDN	-0.354067	0.521368
RSPO1	-1.15462	0.740079
RSPO3	-1.13061	0.79105
SLAMF6	-0.783243	2.71632
SLAMF6	-0.656809	2.3652
SLIT1	0.22262	0.0864509
SLIT2	1.28837	4.76252
SLIT3	-0.756575	0.787855
SMOC1	-0.105486	0.0446234
SMOC2	-1.7283	2.12816
SNED1	0.224163	0.338718
SNED1	0.73848	3.07554
SPARC	-2.12698	3.09449
SPARC	-1.61334	2.04587
SPARCL1	-1.15681	0.897713
SPON1	-0.631344	0.675292
SPON1	-0.382634	0.527257
SPON2	-1.51812	1.47071
SPP1	-3.08627	4.93469
SRPX	-1.56453	2.55699
SRPX2	-0.870065	3.01415
SRPX2	-0.154425	0.296025
SSPO	0.270485	0.632495
SVEP1	-0.520754	0.627997
TGFBI	-1.9551	3.81989
THBS1	-1.30587	2.74366
THBS2	-2.29592	3.48505
THBS3	-1.117	2.19327
THBS3	-1.0066	2.02406
THBS4	-2.57272	1.35145
THSD4	-0.360046	0.504775
TINAG	-0.597902	0.732114
TINAGL1	-0.38962	0.514412
TINAGL1	0.714903	1.96887
TNC	-1.62019	2.83687
TNC	-1.10356	1.25425
TNFAIP6	-1.65437	2.68366
TNN	1.82379	1.52274
TNXB	0.0229034	0.0230189
VWA1	0.474057	0.973593
VWA2	-0.0736954	0.118204
VWA3A	-0.074234	0.0533116
VWA5A	-1.0516	3.898
VWA5A	-0.338421	0.959558
VWCE	1.50848	2.16834
VWF	0.00892852	0.00596014
VWF	0.408613	0.959218
WISP1	-2.73296	3.99798
WISP2	-1.75089	1.81222
ZPLD1	-0.458365	0.854811
COL10A1	-1.46006	2.3693
COL12A1	-2.8458	2.82298
COL14A1	-1.52715	3.65416
COL14A1	-1.439	4.92087
COL15A1	-1.79903	2.35879
COL15A1	-1.67498	3.76808
COL15A1	-1.65832	3.52115
COL16A1	-1.43195	3.51048
COL16A1	-1.41715	4.08027
COL16A1	-0.238333	0.659416
COL17A1	-1.62269	3.84614
COL18A1	-1.49133	3.7944
COL18A1	-1.37261	4.07032
COL1A1	-2.97039	3.37285
COL1A2	-2.06283	2.36257
COL20A1	0.130996	0.305301
COL20A1	0.205147	0.425282
COL22A1	-0.704726	1.16161
COL22A1	-0.285957	0.748058
COL23A1	0.369843	0.478782
COL23A1	0.492538	2.05202
COL24A1	-0.883115	1.90098
COL26A1	0.415328	0.471696
COL26A1	0.670574	0.87773
COL27A1	0.0568119	0.0513407
COL3A1	-2.8601	2.75867
COL4A1	-1.64695	4.99865
COL4A2	-1.87031	4.54927
COL4A3	0.932784	2.34843
COL4A4	1.22632	3.36075
COL4A4	1.80309	4.09714
COL4A4	2.44259	5.3609
COL4A5	0.133119	0.289912
COL4A6	-0.19829	0.240435
COL5A1	-2.35609	3.32722
COL5A2	-1.42434	2.60931
COL5A3	-1.66879	1.59627
COL6A1	-1.3922	1.19698
COL6A2	-2.55803	3.01952
COL6A2	-0.00804556	0.0087018
COL6A3	-3.11512	4.72148
COL6A4	-0.133035	0.0717265
COL7A1	-1.02907	1.18736
COL8A1	-2.95515	5.94326
COL8A2	-1.67104	2.4894
COL9A2	-0.0426423	0.101283
ASPN	-0.737149	1.27145
BCAN	0.0582446	0.0147969
BCAN	0.389903	0.0777902
BGN	-1.36142	2.40079
CHAD	0.267174	0.583973
CHADL	1.33824	3.51594
DCN	-0.311901	0.170429
ESM1	-0.365534	0.459296
FMOD	0.129923	0.14343
HAPLN3	0.665474	2.16726
HSPG2	-0.728481	0.7077
HSPG2	-0.572598	1.34657
IMPG1	0.177168	0.53777
IMPG2	-0.621649	0.953031
LUM	-2.83461	2.57363
NEPN	1.469	1.16046
OGN	-1.04962	1.90969
PODN	0.799783	1.37115
PODNL1	-0.820286	1.68917
PRG4	-1.10955	0.703676
SPOCK2	0.154671	0.165754
SRGN	-0.455498	0.681271
VCAN	-2.18115	3.17361
VCAN	-0.238077	1.05496
ANXA1	-2.3983	4.4154
ANXA1	-1.99657	3.61335
ANXA11	0.616562	2.78112
ANXA13	0.26616	0.203581
ANXA2	-1.72638	3.59775
ANXA3	-2.45354	7.28133
ANXA4	-0.386804	1.13584
ANXA5	-1.70369	4.72114
ANXA6	-1.01712	1.57403
ANXA7	-0.268267	0.683444
ANXA7	0.325121	0.715086
ANXA8	-2.11331	1.43785
ANXA8	-1.75783	2.30054
ANXA9	-0.64021	2.61583
C1QA	-2.93227	4.7608
C1QB	-2.54567	5.95879
C1QC	-2.21741	3.93652
C1QL1	-0.0797726	0.0622137
C1QL4	0.629238	1.84551
C1QTNF1	-0.354862	0.425625
C1QTNF1	1.10783	1.46348
C1QTNF3	1.8271	1.54737
C1QTNF3	2.47192	1.9132
C1QTNF4	1.87892	5.55569
C1QTNF5	-1.87042	2.57012
C1QTNF6	-2.37638	4.81515
C1QTNF7	-0.852781	1.11139
C1QTNF7	0.0433521	0.0468722
CD209A	-1.33049	2.51615
CD209D	0.0816533	0.246561
CLEC10A	-2.39848	2.88662
CLEC11A	-0.670228	1.60799
CLEC14A	0.776511	1.45288
CLEC18A	-0.86354	1.42926
CLEC18A	-0.528524	0.831877
CLEC18A	-0.110822	0.0847982
CLEC1A	-0.0289429	0.06037
CLEC1B	0.240648	1.31975
CLEC1B	1.19339	4.83399
CLEC2D	1.17372	1.87574
CLEC2E	-0.105365	0.3259
CLEC2H	1.12969	0.631111
CLEC2I	-0.0639534	0.10241
CLEC4A1	-2.13587	4.01048
CLEC4A3	-2.43871	6.12067
CLEC4B1	-2.33996	3.48852
CLEC4B1	-1.9122	4.71644
CLEC4D	-1.12745	1.16842
CLEC4E	-0.640421	1.6412
CLEC4N	-2.45939	3.81801
CLEC7A	-1.92	2.7905
CLEC9A	-1.13517	2.56905
COLEC11	0.607934	1.46682
COLEC12	-1.64445	2.55824
CSPG4	-0.0303799	0.0361374
CSPG5	1.64439	3.98615
EMCN	0.173213	0.24825
FCNA	-1.22487	1.44911
FREM1	-1.85224	2.75837
FREM2	0.806494	2.80443
GPC1	0.324035	0.359207
GPC3	-1.3473	3.50207
GPC4	-0.170316	0.315174
GPC5	0.34713	1.62141
GPC6	0.183475	0.250932
GREM1	1.67547	2.93914
GRIFIN	-0.0482462	0.0878142
HPX	0.388798	1.01638
LGALS1	-1.77198	4.65495
LGALS3	-0.886135	2.14074
LGALS4	1.58109	3.74939
LGALS4	1.7116	4.66651
LGALS4	1.71864	4.08677
LGALS7	-0.0293242	0.029218
LGALS8	0.0128558	0.0311814
LGALS9	-1.95244	4.17136
LGALSL	0.519733	1.66233
LMAN1	-0.0741745	0.174627
LMAN1	0.0970821	0.317515
LMAN1L	0.0950533	0.204778
MBL1	-0.503524	0.589001
MBL2	0.0776053	0.105433
MUC1	-0.523314	1.13852
MUC13	-0.0876904	0.171582
MUC16	-0.629878	1.31444
MUC19	1.1797	3.1086
MUC20	1.05009	1.25208
MUC20	1.31814	2.432
MUC4	-2.95303	3.53821
MUC5AC	-0.196727	0.573489
MUC5B	-0.0413945	0.101154
OVGP1	0.790646	2.40258
PARM1	0.42191	0.372171
PLXDC1	-0.806614	1.73019
PLXDC1	-0.256155	0.20817
PLXDC2	0.997129	4.79846
PLXNA2	-0.575938	1.78363
PLXNA4	0.311841	0.560584
PLXNB1	-0.294239	0.963171
PLXNB2	0.397207	1.55369
PLXNB3	-0.284728	1.46473
PLXNC1	-1.05341	3.42614
PLXNC1	-0.2628	0.544225
PLXND1	-0.600592	1.1514
PLXND1	-0.308632	0.765658
REG3G	-2.21924	1.89868
SDC1	-1.30739	2.25792
SDC2	0.171592	0.37197
SDC3	-1.66794	3.10667
SDC4	-0.0156942	0.0368428
SEMA3B	-0.280612	0.991944
SEMA3C	-1.48395	5.2776
SEMA3C	-0.544547	1.07759
SEMA3D	-0.399221	0.467025
SEMA3F	-0.136476	0.235768
SEMA3G	0.411876	0.707613
SEMA3G	0.525894	0.785796
SEMA4A	-0.566138	2.05399
SEMA4B	0.327635	0.804906
SEMA4C	-0.785548	2.33321
SEMA4D	-0.342046	1.75864
SEMA4D	-0.333473	0.677667
SEMA4G	0.82662	1.98072
SEMA5A	-1.12187	3.26355
SEMA5B	-0.0540794	0.031594
SEMA5B	0.0897123	0.0659585
SEMA5B	0.451995	1.28718
SEMA6A	0.170238	0.371036
SEMA6A	0.917744	2.93428
SEMA6B	0.234418	0.270834
SEMA6C	0.611538	2.95768
SEMA6C	0.776256	1.72056
SEMA6D	0.101848	0.047585
SEMA6D	0.105222	0.272436
SEMA7A	-0.0536341	0.039279
SFTA2	1.09505	3.07722
SFTPC	0.263823	0.261729
SFTPD	-2.96653	2.47575
SFTPD	-0.761379	1.12259
1810010H24RIK	0.725728	2.94163
2010005H15RIK	-0.308353	0.630758
ADAM10	-0.239916	0.488946
ADAM11	-1.14755	2.42638
ADAM11	0.451048	1.88277
ADAM12	-0.39419	1.51235
ADAM12	-0.29015	0.668564
ADAM15	0.114013	0.251365
ADAM17	0.548418	2.14061
ADAM17	0.958786	4.31203
ADAM19	-1.85287	3.81275
ADAM21	-0.206549	0.327876
ADAM22	-0.393747	1.08625
ADAM23	-0.532108	0.479041
ADAM26B	-0.601807	1.15614
ADAM26B	0.441113	1.8758
ADAM32	0.558752	2.45481
ADAM33	-0.462724	2.11015
ADAM33	0.0663379	0.16521
ADAM4	0.132131	0.277984
ADAM5	-0.577773	2.19721
ADAM5	-0.492749	1.35272
ADAM6B	0.712113	3.0702
ADAM8	-2.82372	3.89868
ADAM9	-0.754492	1.8828
ADAMDEC1	0.202799	0.277677
ADAMTS1	-0.798983	0.752555
ADAMTS10	-0.451706	1.52535
ADAMTS12	-0.804752	2.52173
ADAMTS14	-0.149388	0.193881
ADAMTS15	-0.229619	0.37423
ADAMTS16	-1.5385	2.91189
ADAMTS17	-0.911422	0.868467
ADAMTS2	-1.81001	4.52405
ADAMTS2	-1.57981	2.11346
ADAMTS4	-2.56415	5.90376
ADAMTS4	-1.27686	2.45252
ADAMTS5	-0.349087	1.39885
ADAMTS6	0.144545	0.142243
ADAMTS7	-1.04604	1.3663
ADAMTS8	-0.448875	0.604083
ADAMTS8	0.480995	3.17824
ADAMTS9	-0.672963	2.18974
ADAMTS9	-0.253365	0.574407
ADAMTSL1	0.613183	1.0764
ADAMTSL2	-0.763811	1.82307
ADAMTSL4	0.196402	0.407814
ADAMTSL5	-1.57572	3.69871
ADAMTSL5	-0.471591	1.24281
AMBP	0.197469	0.15919
BC100530	-1.34371	2.90225
BMP1	-1.53813	2.58486
BMP1	-1.36827	1.76423
BMP1	-0.100153	0.284676
CD109	-1.13861	1.90352
CELA1	-1.19902	0.770135
CST13	-0.0235674	0.0322018
CST3	-0.585323	2.23318
CST6	0.584674	2.21288
CST7	-0.810178	1.9699
CST8	1.94243	1.07004
CSTB	-1.17819	3.65621
CTSA	-0.0145238	0.0322974
CTSA	0.0677452	0.150529
CTSB	-0.878785	3.66184
CTSC	-1.44762	4.94583
CTSC	-0.262573	0.483561
CTSD	-0.735816	1.76297
CTSE	-0.414078	0.29812
CTSF	0.197338	0.237334
CTSG	-0.68019	1.32325
CTSH	-0.619217	1.81709
CTSK	-1.47648	1.94067
CTSL	-1.28399	4.98576
CTSO	0.281719	0.961149
CTSS	-2.29852	4.75901
CTSW	-0.738721	1.5273
CTSZ	-0.856499	3.87455
EGLN2	-0.278117	0.555509
EGLN2	0.0315806	0.0868799
EGLN3	0.175723	0.354394
EGLN3	0.458369	1.25097
ELANE	0.0498997	0.14502
F10	-1.13465	3.69628
F13A1	-1.43878	1.55455
F13B	0.702056	0.441186
F2	1.0931	1.42439
F7	-0.92362	2.80424
F7	-0.826753	1.24448
F9	0.100976	0.165146
FAM20A	0.00290485	0.0025398
FAM20B	0.921871	2.51354
FAM20C	-0.579997	1.23991
FAM20C	-0.428602	0.989729
GM5483	0.449643	0.817875
HABP2	-0.595873	0.944502
HABP2	0.45768	0.802452
HPSE	-1.27593	2.59448
HPSE	-0.0729351	0.149834
HRG	0.998839	1.28463
HTRA3	-0.69306	2.28229
HTRA4	0.345274	1.28855
HYAL1	0.456697	0.876715
HYAL1	0.834483	3.12872
HYAL2	0.612003	2.72608
HYAL3	1.45461	3.66234
ITIH1	0.608449	0.897136
ITIH2	1.30692	2.50425
ITIH3	-1.4338	3.20149
ITIH4	-3.86967	1.04773
ITIH4	-2.77048	1.38147
ITIH5	0.0760714	0.110715
KAZALD1	0.221079	0.325429
KNG1	1.38719	6.27254
KNG2	0.607646	1.54058
KNG2	0.939086	2.85279
LOX	-0.671308	0.621191
LOX	-0.6101	0.498411
LOXL1	-2.83208	5.53819
LOXL1	-1.5782	2.4508
LOXL2	-1.43814	1.81699
LOXL3	-0.735686	2.1153
LOXL4	-0.699176	2.48921
MASP1	-0.594132	0.962468
MASP1	0.0759908	0.0604342
MASP2	1.24233	4.26315
MASP2	1.80379	4.24008
MEP1A	0.630318	0.732256
MEP1B	1.11006	0.708053
MMP11	-1.14746	1.35987
MMP11	-1.09641	1.05859
MMP13	-0.563624	1.57312
MMP14	-1.7272	2.29858
MMP15	-0.297125	0.350494
MMP17	-0.094506	0.216194
MMP19	-1.0543	1.97715
MMP2	-3.39955	4.07294
MMP23	-1.85295	4.11991
MMP27	-1.17948	3.31813
MMP3	-1.16148	1.04897
MMP7	-2.69223	1.69925
MMP8	0.430917	1.55789
NGLY1	1.0492	3.81898
OGFOD1	-1.35564	4.66053
OGFOD1	-0.490645	1.2625
OGFOD2	0.709756	2.99733
P4HA1	0.541451	1.38559
P4HA1	0.629555	2.07229
P4HA2	-0.331557	1.40027
P4HA3	-0.717893	0.873195
P4HA3	-0.146183	0.38364
P4HTM	0.435023	1.33374
PAMR1	-0.936411	1.57435
PAPPA	0.350921	0.304652
PAPPA2	0.398874	0.724021
PCSK5	-0.356559	0.278069
PCSK5	0.22712	0.276381
PCSK6	2.31267	3.35169
PLAT	-1.21619	1.46417
PLAU	0.35003	0.986148
PLG	0.911257	1.35558
PLOD1	-0.762968	2.52964
PLOD1	-0.0355983	0.0751786
PLOD2	0.834247	3.0697
PLOD3	-0.299677	1.12032
PRSS12	1.62443	5.58325
PRSS3	-0.480912	0.983883
PZP	1.28702	0.315345
SERPINA10	-3.66601	7.42433
SERPINA10	-2.9452	4.7059
SERPINA11	0.174128	0.38127
SERPINA1A	1.47841	1.96614
SERPINA1A	1.8278	2.76095
SERPINA1C	1.55528	2.07882
SERPINA1D	0.524886	0.318444
SERPINA1D	1.5852	1.6374
SERPINA1E	1.82534	2.25286
SERPINA1E	2.14151	2.7855
SERPINA1F	1.01145	5.02447
SERPINA3B	-0.406954	1.34555
SERPINA3C	-0.914922	0.534162
SERPINA3F	-1.96362	4.42448
SERPINA3M	-1.37501	2.81498
SERPINA6	-0.267841	0.269148
SERPINA9	0.309274	1.10825
SERPINB1A	0.15163	0.245403
SERPINB1C	0.433477	0.799046
SERPINB2	-1.18228	1.91196
SERPINB3C	0.0838624	0.263483
SERPINB5	-2.03425	1.43393
SERPINB6A	-1.61108	3.48767
SERPINB6B	-0.914429	2.92021
SERPINB6C	-1.76119	3.95349
SERPINB6C	-1.20771	2.57202
SERPINB8	-0.540343	2.26567
SERPINB9	-0.799662	1.73251
SERPINC1	0.756978	1.71993
SERPIND1	-1.14161	3.10002
SERPINE1	-3.58864	4.2545
SERPINF1	-2.5606	3.84286
SERPINF1	-2.47039	1.90008
SERPINF2	0.048882	0.020215
SERPING1	-1.91747	2.85511
SERPING1	-0.703881	1.03839
SERPINI1	-0.176265	0.256462
ST14	0.42511	0.661119
STFA1	-1.17914	2.61414
STFA2L1	0.770286	1.51741
STFA3	-0.468834	0.508933
SULF1	-2.46861	2.44223
SULF1	-1.54179	2.90892
SULF2	0.0958144	0.18472
TGM1	0.362545	0.54319
TGM2	-1.22142	5.6416
TGM2	-0.842585	3.67856
TGM3	0.103665	0.252465
TGM5	-1.07319	2.19088
TGM6	0.239789	0.376454
TIMP1	-3.8236	4.36228
TIMP2	-1.86656	4.60183
TIMP2	-0.384432	0.395064
TIMP3	0.468351	0.816678
TIMP4	0.856221	1.80688
TLL1	1.00601	2.12527
ANGPT1	-0.200417	0.34759
ANGPT2	0.424895	0.355312
ANGPTL1	-0.187572	0.23258
ANGPTL3	1.67698	3.62741
ANGPTL4	-0.295928	0.223204
ANGPTL6	0.354767	1.13708
ANGPTL7	2.33668	2.92976
ARTN	0.523647	1.23904
BDNF	0.537278	0.80095
BMP2	0.367654	0.39926
BMP3	0.561255	1.80918
BMP4	0.708805	2.88177
BMP6	-1.07877	2.25372
BMP7	0.993501	3.69019
BMP8A	0.540564	1.51672
BRINP2	-0.327226	0.383061
BTC	1.21233	1.68846
CCBE1	-0.186871	0.215803
CCBE1	0.113546	0.187045
CCBE1	1.19577	2.64636
CCL1	-1.07052	2.90698
CCL1	0.109168	0.115939
CCL11	-1.76463	3.20701
CCL12	-3.29737	7.23734
CCL19	-0.922112	2.64391
CCL19	-0.538434	1.10258
CCL2	-2.599	4.56153
CCL21A	0.190069	0.16784
CCL24	-1.73398	4.6924
CCL25	-0.234395	0.692112
CCL25	0.404593	1.07311
CCL25	0.752102	2.60987
CCL27A	0.277669	1.50644
CCL27A	0.443612	1.87198
CCL27A	0.676755	2.73621
CCL28	0.655431	0.639793
CCL3	0.347926	0.496828
CCL4	-0.730246	1.4981
CCL6	-2.64369	3.12904
CCL7	-2.66809	4.51333
CCL8	-3.4967	2.1459
CCL9	-2.65331	4.0362
CHRD	-0.432104	1.68394
CHRD	0.719031	2.1184
CHRDL1	1.26254	5.54389
CHRDL1	1.26435	5.67889
CHRDL1	1.6174	4.68894
CHRDL2	1.26038	2.32032
CLCF1	-2.10513	5.22624
CRLF1	-3.00704	3.45808
CRLF1	-2.59415	4.60407
CRLF3	-0.189536	0.64926
CRLF3	0.0937632	0.158603
CSF1	-1.30025	2.86385
CSF1	-1.25742	2.66056
CSF1	-1.07376	2.69913
CTF1	1.06883	3.72512
CTF2	0.596117	2.23539
CXCL1	-3.99036	4.47849
CXCL10	-3.3022	6.23647
CXCL10	-2.27954	3.03648
CXCL11	0.00957838	0.0171476
CXCL12	0.497299	0.762256
CXCL12	1.44984	3.17107
CXCL14	-1.10447	0.719357
CXCL5	-3.76174	4.20864
CXCL9	-2.55495	5.98509
CXCL9	-1.50203	5.23462
DHH	0.624384	1.38993
EBI3	-1.47523	4.76332
EDA	0.298799	0.651264
EGF	5.02483	3.7344
EGFL6	2.02203	3.73384
EGFL7	0.0417552	0.0509456
EGFL8	0.47116	1.99508
FASL	-0.406641	0.984349
FGF1	0.984962	2.43337
FGF1	1.86373	4.21016
FGF11	0.577741	1.37998
FGF12	0.468377	0.963413
FGF13	0.0916006	0.164254
FGF14	-0.292858	0.70506
FGF18	-0.249698	0.267973
FGF18	-0.143532	0.157492
FGF2	0.11972	0.185192
FGF20	1.3776	4.84772
FGF22	0.838407	4.08052
FGF23	0.23489	0.391847
FGF6	1.33503	5.28569
FGF7	-1.04452	2.16968
FGF8	0.612417	2.34353
FGF9	1.4487	5.25861
FGFBP3	0.595101	1.6249
FLG	0.540041	1.60615
FLT3L	-0.421815	1.71182
FLT3L	-0.055578	0.0950303
FRZB	-0.679077	0.896954
FST	0.594358	0.847507
FSTL1	-1.88106	2.49686
FSTL3	0.72363	1.58148
GDF1	-0.125095	0.113154
GDF10	0.0295975	0.0338234
GDF11	-0.182954	0.291962
GDF15	-0.378261	0.437736
GDF3	-1.11669	1.7769
GDF3	0.475707	1.08416
GDF5	-0.0963501	0.197733
GDF5	0.0833267	0.313244
GDF7	0.806166	3.39127
GDF9	-0.539852	2.23452
GDNF	-0.229504	0.370655
GM13271	0.163296	0.550859
GM13271	0.313952	0.747081
GM13285	0.168918	0.281714
HBEGF	-0.580166	0.785324
HCFC1	0.180671	0.581942
HCFC2	-0.010612	0.0171781
HGF	-0.759484	2.74269
HGFAC	0.591166	1.84109
HHIP	0.451524	0.300509
IFNA12	0.0220127	0.0447648
IFNA13	0.0867138	0.122921
IFNA14	-0.264893	0.946348
IFNA16	-0.237071	0.841509
IFNA2	-0.0350837	0.0542547
IFNA2	0.895849	3.70727
IFNA5	-0.0476714	0.0933702
IFNAB	-0.120235	0.316658
IFNG	-0.320714	0.634653
IFNK	0.0129375	0.0135071
IGF1	-2.09328	2.57457
IGF1	-1.38265	1.50582
IGF1	-1.3532	1.71096
IGF1	-0.161311	0.341139
IGF1	0.211161	0.843443
IHH	0.215241	0.20446
IL11	-1.14462	3.51937
IL15	-0.487978	0.777702
IL17D	0.283912	1.54133
IL17D	0.317316	0.635834
IL18	-1.23158	4.18716
IL1F6	-3.86595	4.04921
IL1F9	0.662042	0.746772
IL1RN	-1.13964	2.61863
IL22	0.210147	0.734361
IL24	0.286907	0.540437
IL34	-0.202588	0.195584
IL6	-2.68743	3.03135
IL7	-0.458697	1.41238
INHA	-0.84728	1.09956
INHBA	-2.75367	3.44238
INHBB	-1.18451	1.39017
INHBE	0.48855	3.12052
INS2	0.552684	1.67104
INSL5	-0.240984	0.719848
INSL6	0.890456	3.19103
ISM1	0.600819	0.919092
KITL	1.41187	4.37256
LEFTY1	-0.738395	0.800521
LEFTY2	0.161051	0.41159
LIF	-1.54824	3.21336
LTA	-0.333868	0.731066
LTB	-1.44479	1.63548
MDK	0.578405	1.16642
MDK	0.637669	1.54903
MEGF10	-0.911654	1.77296
MEGF11	0.224748	0.859602
MEGF6	-1.38467	1.07389
MEGF8	0.142613	0.37182
MEGF9	1.14272	3.70992
NGF	-0.460749	1.0046
NODAL	0.366652	1.21775
NRG1	-0.1974	0.266919
NRG4	-0.819327	0.624119
NRG4	-0.472373	0.362938
NRTN	1.19499	4.01914
NTF3	0.787312	1.15588
NTF5	-0.193588	0.325574
PDGFA	-0.690778	1.70757
PDGFA	-0.608737	1.37204
PDGFB	-2.36214	6.50907
PDGFB	-1.20764	1.83587
PDGFC	-0.960421	2.45995
PDGFD	-0.79547	2.4608
PF4	-2.11997	2.43374
PGF	0.16916	0.352355
PIK3IP1	-0.726996	1.69679
PIK3IP1	-0.0322227	0.020096
PRL2C1	-1.12064	1.18743
PRL2C5	-0.952926	0.969518
PRL2C5	-0.673099	0.943223
PRL3B1	-0.559851	1.642
PRL3D1	0.216925	0.623629
PTN	-1.15336	1.5602
PTN	-0.693212	0.769919
S100A1	0.136327	0.410444
S100A1	0.629832	2.45252
S100A10	0.0565065	0.128419
S100A13	0.301348	1.00824
S100A14	-1.55543	1.16998
S100A16	-1.1861	3.43342
S100A16	-0.602146	0.973711
S100A2	-0.25105	0.630091
S100A3	-0.427369	1.23022
S100A4	-1.33389	1.83556
S100A4	-1.04425	1.48533
S100A5	-0.0642221	0.226293
S100A6	-1.69143	2.08796
S100A8	1.37712	1.20029
S100A9	1.374	1.25275
S100B	-0.27355	0.167035
S100G	3.07662	4.60898
S100G	3.18623	4.65378
S100Z	0.303065	0.663272
SCUBE1	-1.45976	1.99595
SCUBE2	-0.0989988	0.181129
SCUBE2	-0.0828005	0.0912238
SCUBE3	0.720273	1.43235
SCUBE3	1.02921	2.44601
SFRP1	-0.760296	1.84464
SFRP2	-0.401638	0.375187
SFRP4	-2.83791	2.56761
TCHH	0.83595	1.53059
TCHHL1	0.801878	1.31587
TDGF1	1.56273	2.28323
TGFB1	-0.831996	1.79646
TGFB2	-1.26611	1.33671
TGFB2	-1.08454	1.35539
TGFB3	-1.351	2.38521
THPO	-0.94499	1.8122
TNF	-1.26726	6.65993
TNFSF10	0.349692	0.765444
TNFSF12	-1.2602	4.63642
TNFSF12	0.446318	1.70689
TNFSF13	-1.11508	3.69
TNFSF13B	-1.54486	2.733
TNFSF14	-0.370127	1.02706
TNFSF15	-0.954587	1.92602
TNFSF8	-1.14029	2.2564
TNFSF9	-0.786908	2.28473
VEGFA	-0.0857456	0.12906
VEGFA	1.28813	4.74008
VEGFB	0.935592	3.08454
VEGFC	0.146976	0.424421
WFIKKN1	0.76409	1.45785
WFIKKN2	0.199623	0.286174
WIF1	-0.332944	0.463669
WNT1	0.0708241	0.1998
WNT10A	-0.390576	0.497409
WNT16	0.212369	1.12893
WNT2	-0.541543	0.60666
WNT4	-1.47227	0.72002
WNT4	-1.01551	0.833007
WNT5A	0.614137	1.69404
WNT5B	-0.080139	0.18399
WNT6	0.401996	0.527484
WNT7A	-1.77724	3.20654
WNT7B	-0.0824268	0.100975
WNT9A	0.0311555	0.058405
WNT9B	0.448456	0.323097
XCL1	-0.816799	2.73559
